# Supplementary material for: Identification and Functional Annotation of Genes Differentially Expressed in the Reproductive Tissues of the Olive Tree (Olea europaea L.) through the Generation of Subtractive Libraries
Source: Front Plant Sci. 2017 Sep 13;8:1576. doi: 10.3389/fpls.2017.01576 (PMC5601413; doi:10.3389/fpls.2017.01576)
Supplement: Supplementary file 1 [file Table1.XLSX]

## Sheet: Sheet1
Primer sequences used for qPCR analysis
Tissue	Name	Forward Primer	Reverse Primer	Product Size (bp)
Pollen	Expansin 11 precursor	GCAGGCACCTCCCACGGTTC	ACGTCCGTGGAAGAAGGGTCGT	73
Pollen	Pectinesterase inhibitor 21	TGCCTGCGTTAGGAGCCTCG	TCACCTCGTCAAGAGTGGCCAGA	98
Pollen	Pectin metil esterase 2.1	TGGTAGCTCGCACCAGCCCA	CCACCTACCTCGGCCGACCA	115
Pollen	Pathogenesis Related Protein-1	AGCCACTGCACCCAACCCCT	GCCTGTGCCAACCGGAGACAG	90
Pistil	Pathogenesis Related Protein-5	TGAAGGCTTGCATACCTGTG	ACGGTGGCTTGTAAAAGTGC	93
Pistil	Disease Resistance Response Protein-206	TCGGCTCTTGCCACCTCCCA	GGGGGCTTTTCCAATGCCCGT	101
Pistil	Esterase PIR7A	ACTGCTGGAGGACGCCGGTT	GATTTTCGGGTCAATGCCGGAGG	70
Pistil	14-3-3 Protein	CCAGGAAGCCCTCCTAGCACCA	GCCGAACAGGCTGAGCGGTA	147
Leaf	Photosystem II 10 kda polypeptide	ACATGGGCGGTGGCAAGAAAATC	TCCCTCAAGTCCATGCCCCCA	70
Leaf	Mitogen-activated protein kinase 3	AATGGCTCGGGGCATACTGGC	TCACAGTGGAAGAAGCTCTGGCG	82
Leaf	Fructose-bisphosphate aldolase	GGCACCGTGGAGTTAGCTGGG	TACTGCTGGCAACGGGCTCCT	80
Leaf	Chlorophyll a-b binding protein	GGCCACCTGGGAATGCAGGG	CCAGGGTCCATGGGCAAGCA	82
Constitutive genes
	Zinc finger	AAACCCGAGAGCACAGCGGC	AGTGGTGCGCGGAGAACTGC	120
	Katanin p60	CAAGGCGGCAGAGGCATCGT	TGCTTCGCACCATCGCCGTT	138
