# Supplementary material for: Identification and Functional Annotation of Genes Differentially Expressed in the Reproductive Tissues of the Olive Tree (Olea europaea L.) through the Generation of Subtractive Libraries
Source: Front Plant Sci. 2017 Sep 13;8:1576. doi: 10.3389/fpls.2017.01576 (PMC5601413; doi:10.3389/fpls.2017.01576)
Supplement: Supplementary file 2 [file Table2.XLSX]

## Sheet: Sheet1
Sample	BLAST NCBI DATABASE	(eValue (<E-04)	Accesion number		BLAST OLEAEST DATABASE	(eValue (<E-04)	Id Uniprot		Screening Results
P1C1-PoP					Unknown protein	0.0007			Non specific			Sequences without a significant similarity are boxed in orange
P1C2-PoP	Expansin 11 precursor	0.000617112	XP_002266243		Expansin-A6	1e-09	Q38865		Sustractive. Pollen specific
P1C3-PoP	Protein	7.87344e-32	XP_002303172		Pectinesterase 2.1	9e-27	P09607		Sustractive. Pollen specific
P1C4-PoP	L-ascorbate oxidase-like protein	1.51509e-54	AAL87103		L-ascorbate oxidase homolog (Pollen-specific protein NTP303)/ Monocopper oxidase-like protein SKU5	1e-31	P29162/ Q9SU40		Sustractive. Pollen specific
P1C5-PoP	Major pollen allergen ole e 1	6.39953e-14	CAA73038		Olee1-like protein	4e-06	O49813		Sustractive. Pollen specific
P1C6-PoP	Protein	1.1752e-31	XP_002303172		Pectin metil estarase 3	1e-23	Q96576		Sustractive. Pollen specific
P1C7-PoP									Sustractive. Pollen specific
P1C8-PoP	Lactoylglutathione lyase glyoxalase i-like protein	0.42698	NP_001235416		Metallothiol transferase fosB 1/ Lactoylglutathione lyase	0.008	Q81RK2/ Q8H0V3		Sustractive. Pollen specific
P1C9-PoP	Major pollen allergen ole e 1	3.00015e-09	CAA73038		Olee1-like protein	0.045	O49813		Sustractive. Pollen specific
P1C10-PoP	Major pollen allergen ole e partial	5.90959e-42	B53806		Olee1-like protein	6e-12	O49813		Sustractive. Pollen specific
P1C11-PoP									Sustractive. Pollen specific
P1C12-PoP	Polyol transporter	3.03974e-52	XP_002519083		Putative polyol transporter 1	5e-59	Q9XIH7		Sustractive. Pollen specific
P1C13-PoP	Protein	5.18999e-33	XP_002303172		Pectin metil estarase 2.1	4e-26	P09607		Sustractive. Pollen specific
P1C14-PoP	L-ascorbate oxidase-like protein	8.63688e-127	AAQ90182		L-ascorbate oxidase homolog (Pollen-specific protein NTP303)/ Monocopper oxidase-like protein SKS2	3e-44	P29162/ Q9FHN6		Sustractive. Pollen specific
P1C15-PoP									Non specific
P1C16-PoP	Probable pectinesterase pectinesterase inhibitor 21-like	4.53892e-88	XP_002275819		Pectinesterase/pectinesterase inhibitor U1	4e-39	Q43143		Sustractive. Pollen specific
P1C17-PoP	Mitochondrial f1f0 atp synthase subunit	2.8373e-22	EHY54561						Non specific
P1C18-PoP	Protein	6.71237e-30	XP_002303172		Pectin methylesterase 2.1	2e-23	P09607		Non specific
P1C19-PoP					Unknown protein	4e-05			Non specific
P1C20-PoP	Protein	3.21572e-21	XP_002303172		Pectinesterase 3	1e-21	Q96576		Non specific
P1C21-PoP					Acyl-CoA-binding protein	0.0008	O04066		Sustractive. Pollen specific
P1C22-PoP	At4g03420 f9h3_4	1.65752e-22	ADM21188		Expansin-A4	1e-09			Non specific
P1C23-PoP	Myosin heavy chain-like protein	8.32176e-21	XP_002280610						Non specific
P1C24-PoP	At4g03420 f9h3_4	6.12896e-52	XP_002517959		Unknown protein	2e-43			Non specific
P1C25-PoP	Zinc-finger protein	5.19606	XP_002267645		Zinc finger protein 1	0.006	Q42430		Sustractive. Pollen specific
P1C26-PoP	Protein	4.54037e-12	AAK58515		Glucan endo-1,3-beta-glucosidase 14	0.001	Q9ZQG9		Sustractive. Pollen specific
P1C27-PoP									Non specific
P1C28-PoP	Gdsl esterase lipase at3g48460-like	7.43006e-10	CBI27521		Anter-specific proline-rich protein APG/ Esterase	7e-10	P40602/ Q7Y1X1		Non specific
P1C29-PoP	Transferring glycosyl	1.71407e-87	XP_002524800		Glycosyltransferase 8 domain-containing protein 1/ Galacturonosyltransferase 8	1e-15	Q6DJM3/ Q9LSG3		Non specific
P1C30-PoP	Auxin-induced in root cultures protein 12	5.20304e-21	XP_002533060		Auxin-induced in root cultures protein 12	2,00E-11	Q94BT2		Non specific
P1C31-PoP	Gdsl esterase lipase	5.12309e-60	XP_002267715		Esterase/ Alpha-L-fucosidase 3	3e-18	Q7Y1X1/ Q9FXE5		Non specific
P1C32-PoP	Lim domain-containing protein	6.07272e-87	ACB05475		Pollen-specific protein SF3/ Xin actin-binding repeat-containing protein 2/ LIM domain and actin-binding protein 1	8e-47	P29675/ Q4U4S6/ Q9ERG0		Non specific
P1C33-PoP	Cyclase family protein	4.50529e-53	CBI40274		Unknown protein	2e-45			Non specific
P1C34-PoP					Cytochrome b-c1 complex subunit 8	7e-12	P46269		Non specific
P1C35-PoP	PREDICTED: uncharacterized protein LOC100242684 isoform 1 [Vitis vinifera]	0.015879	XP_002278876		Unknown protein	1e-117			Non specific
P1C36-PoP	H(+)-atpase 9	4.10962e-21	XP_002280201		Plasma membrane ATPase 1	6e-34	P22180		Non specific
P1C37-PoP					Ubiquitin	0.15	P69326		Non specific
P1C38-PoP									Non specific
P1C39-PoP	Protein	2.76747e-48	XP_002265705		Unknown protein	2e-26			Non specific
P1C40-PoP									Non specific
P1C41-PoP	Pollen specific protein sf21	1.07918e-14	ABB82547		Pollen-specific protein SF21	6e-52	O23969		Sustractive. Pollen specific
P1C42-PoP	Glycerophosphoryl diester phosphodiesterase family protein	3.99782e-28	XP_002866252		Biotin carboxyl carrier protein of acetyl-CoA carboxylase, chloroplastic	0.002	Q42783		Non specific
P1C43-PoP	Glycerophosphoryl diester phosphodiesterase family protein	3.99782e-28	XP_002866252		Biotin carboxyl carrier protein of acetyl-CoA carboxylase, chloroplastic	0.002	Q42783		Non specific
P1C44-PoP	Pectinesterase pectinesterase inhibitor 28-like	3.57207e-36	XP_003631952		21 kDa protein/ Pectinesterase/pectinesterase inhibitor U1	6e-11	P17407/ Q43143		Non specific
P1C45-PoP					Vacuolar-sorting protein SNF7	2e-14	Q6CJL0		Non specific
P1C46-PoP	Aspartyl protease family protein	0.0168865	XP_002265771		Aspartic proteinase nepenthesin-1	0.018	Q766C3		Sustractive. Pollen specific
P1C47-PoP	Nitrate transporter	6.5107e-41	XP_002524480		Nitrate transporter 1.1/ Peptide transporter PTR2	7e-46	Q05085/ P46032		Sustractive. Pollen specific
P1C48-PoP	Major pollen allergen ole e partial	5.88704e-42	B53806		Olee1-like protein	6e-12	O49813		Sustractive. Pollen specific
P1C49-PoP									Sustractive. Pollen specific
P1C50-PoP	Major pollen allergen ole e 1	7.56223e-14	CAA73038		Olee1-like protein	3e-06	O49813		Sustractive. Pollen specific
P1C51-PoP	Saur family protein	7.71338e-38	XP_002511675		Auxin-induced protein 10A5	4e-25	P33079		Non specific
P1C52-PoP	Expansin 11 precursor	0.00161195	AFK34290		Expansin-A6	4e-09	Q38865		Non specific
P1C53-PoP					3-ketoacyl-CoA synthase 19	0.5	Q9FG87		Non specific
P1C54-PoP					ABC transporter G family member 36	0.19	Q9XIE2		Sustractive. Pollen specific
P1C55-PoP	Glucan endo- -beta-glucosidase	5.13465e-39	XP_003630124		Glucan endo-1,3-beta-glucosidase 5	6e-12	Q9M088		Non specific
P1C56-PoP	Cobra-like protein 10	1.02486e-135	XP_002316982		COBRA-like protein 11	1e-45	Q9T045		Non specific
P1C57-PoP	Nuclear-interacting partner of alk	1.20492e-17	XP_002275093		Unknown protein	1e-32			Sustractive. Pollen specific
P1C58-PoP	Subtilase family protein	8.25148e-30	CAN75240		Subtilisin-like protease/ Xylem serine proteinase 1/ Cucumisin	1e-56	O65351/ Q9LLL8/ Q39547		Sustractive. Pollen specific
P1C59-PoP	Hypothetical protein VITISV_015170 [Vitis vinifera]	3.27419e-47	CAN68990		Unknown protein	1e-19			Non specific
P1C60-PoP	Universal stress protein family protein	1.92669e-61	XP_002528336		Uncharacterized protein C167.05/ Universal stress protein A-like protein	0.029	P87132/ Q8LGG8		Non specific
P1C61-PoP	All6_oleeu ame: full=pollen allergen ole e 6 ame: allergen=ole e 6	2.91447e-10	O24172		Succinate-semialdehyde dehydrogenase, mitochondrial	0.43	Q9SAK4		Non specific
P1C62-PoP	Protein	4.27942e-24	XP_002273743		Plastid-lipid-associated protein, chloroplastic	4e-30	Q9ZWQ8		Non specific
P1C63-PoP	L-ascorbate oxidase homolog	3.35772e-126	AAQ90182		L-ascorbate oxid-ascorbate oxidase homolog (Pollen-specific protein NTP303)/ Monocopper oxidase-like protein SKS2	4e-44	P29162/ Q9FHN6		Sustractive. Pollen specific
P1C64-PoP									Sustractive. Pollen specific
P1C65-PoP	Lat52-like protein	1.31209	AFB73931		Protein AUXIN SIGNALING F-BOX 2/ Protein TRANSPORT INHIBITOR RESPONSE 1	0.005	Q9LW29/ Q570C0		Non specific
P1C66-PoP	Auxin-induced in root cultures protein 12	6.29797e-21	XP_002533060		Auxin-induced in root cultures protein 12	2e-11	Q94BT2		Non specific
P1C67-PoP	Probable pectinesterase pectinesterase inhibitor 21-like	2.08002e-93	XP_002275819		Pectinesterase/pectinesterase inhibitor U1	5e-43	Q43143		Non specific
P1C68-PoP	L-ascorbate oxidase homolog	8.00224e-128	AAQ90182		L-ascorbate oxid-ascorbate oxidase homolog (Pollen-specific protein NTP303)/ Monocopper oxidase-like protein SKS2	7e-45	P29162/ Q9FHN6		Non specific
P1C69-PoP	Plant invertase pectin methylesterase inhibitor domain-containing protein	0.413046	ABK22757		ADP-ribosylation factor 2	0.28	P51823		Non specific
P1C70-PoP	Alpha tubulin	1.26716e-105	ACJ37364		Tubulin alpha-1 chain	1e-116	P46259		Non specific
P1C71-PoP	Aspartyl protease family protein	5.92306e-27	CAN65806		Aspartic proteinase nepenthesin-2/ Chymosin	4e-11	Q766C2/ P18276		Sustractive. Pollen specific
P1C72-PoP	Autoinhibited h+ atpase	0.0	CAN61424		Plasma membrane ATPase 3	6e-43	Q08436		Non specific
P1C73-PoP	Protein	1.29997e-123	ACJ11754		UDP-glucuronate 4-epimerase 6	1e-90	Q9LIS3		Non specific
P1C74-PoP	Alpha tubulin	1.06397e-105	ACJ37364		Tubulin alpha-1 chain	1e-116	P46259		Non specific
P1C75-PoP	Cation proton exchanger	8.933e-53	CBI37527		Pyrophosphate-energized membrane proton pump 3	0.43	Q9FWR2		Sustractive. Pollen specific
P1C76-PoP	Galactose oxidase	3.22972e-78	XP_002280698		Unknown protein	4e-14			Non specific
P1C77-PoP	Probable pectinesterase pectinesterase inhibitor 21-like	2.23142e-73	CAN67129		Pectinesterase/pectinesterase inhibitor U1	2e-37	Q43143		Non specific
P1C78-PoP	Iron-inhibited abc transporter	1.37788e-63	AEQ94144		ATP-binding cassette sub-family F member 2 (ABC transporter family)	8e-41	Q99LE6		Non specific
P1C79-PoP	Lim domain-containing protein	2.52819e-85	ACB05475		Pollen-specific protein SF3/ Xin actin-binding repeat-containing protein 2/ LIM domain and actin-binding protein 1	4e-47	P29675/ Q4U4S6/ Q9ERG0		Non specific
P1C80-PoP					2,3-bisphosphoglycerate-independent phosphoglycerate mutase	0.045	O24246		Non specific
P1C81-PoP	Protein	1.90993e-31	XP_002303172		Pectinesterase 2.1	3e-26	P09607		Sustractive. Pollen specific
P1C82-PoP	Aspartic proteinase-like protein 2-like	1.74282e-81	NP_001052489		Aspartic proteinase-like protein 2	5e-33	Q9S9K4		Non specific
P1C83-PoP									Non specific
P1C84-PoP	Lupus la	2.08911e-68	XP_002521842		La-related protein 7 (Contains RNA binding domain)	1e-10	Q4R627		Non specific
P1C85-PoP	Probable adp-ribosylation factor gtpase-activating protein agd8-like	6.60713e-35	XP_002527677		Probable ADP-ribosylation factor GTPase-activating protein AGD8	6e-30	Q8H100		Non specific
P1C86-PoP	Protein	4.3742e-104	XP_002520406		Sugar transport protein 1	7e-46	P23586		Sustractive. Pollen specific
P1C87-PoP	Gdsl esterase lipase	7.2814e-62	XP_002267715		Esterase/ Alpha-L-fucosidase 3	4e-19	Q7Y1X1/ Q9FXE5		Non specific
P1C88-PoP	Invertase inhibitor-like	0.000466539	XP_003632383		50S ribosomal protein L17	0.002	A0QKU4		Non specific
P1C89-PoP	Pollen specific protein	1.81538e-74	AAD02557		L-ascorbate oxidase homolog (Pollen-specific protein NTP303)/ Monocopper oxidase-like protein SKU5	2e-38	P29162/ Q9SU40		Sustractive. Pollen specific
P1C90-PoP	Probable pectinesterase pectinesterase inhibitor 21-like	6.98478e-20	XP_002275819		Pectinesterase 1	0.013	Q43867		Sustractive. Pollen specific
P1C91-PoP	Major pollen allergen ole e 1	2.27043e-14	CAA73038		Olee1-like protein	3e-06	O49813		Sustractive. Pollen specific
P1C92-PoP	Pollen specific protein	1.13619e-74	AAD02557		L-ascorbate oxidase homolog (Pollen-specific protein NTP303)/ Monocopper oxidase-like protein SKU5	2e-38	P29162/ Q9SU40		Sustractive. Pollen specific
P1C93-PoP	Abc transporter b family member	9.16649e-57	ABG56413		ABC transporter B family member 4	1e-24	O80725		Sustractive. Pollen specific
P1C94-PoP	Protein	1.33398e-23	XP_002303172		Pectinesterase 2.1	4e-22	P09607		Sustractive. Pollen specific
P1C95-Po									Non specific
P1C96-PoP	Major pollen allergen ole e partial	1.38015e-68	AAQ08188		Olee1-like protein	5e-12	O49813		Non specific
P2C1-PoP	Rho guanine nucleotide exchange factor 8-like	2.93399e-116	XP_002516026		Rop guanine nucleotide exchange factor 1	5e-32	Q93ZY2		Sustractive. Pollen specific
P2C2PoP	Shaggy-related protein kinase theta	2.36037e-107	CAA69899		Shaggy-related protein kinase zeta	4e-97	Q39010		Sustractive. Pollen specific
P2C3-PoP	Protein	1.11277e-24	XP_002273743		Plastid-lipid-associated protein, chloroplastic	0.25	Q9ZWQ8		Sustractive. Pollen specific
P2C4-PoP					Unknown protein	6e-10			Sustractive. Pollen specific
P2C5-PoP	Polygalacturonase	2.78941e-42	ADK92878		Polygalacturonase	2e-27	P48979		Non specific
P2C6-PoP	PREDICTED: uncharacterized protein LOC100255169 [Vitis vinifera]	1.17569	XP_002266224		Unknown protein	0.095			Sustractive. Pollen specific
P2C7-PoP	Cellulose synthase a catalytic subunit 1	4.87919e-35	XP_002518122		Cellulose synthase-like protein D2	5e-17	Q9LFL0		Non specific
P2C8-PoP					2,3-bisphosphoglycerate-independent phosphoglycerate mutase	0.065	O24246		Non specific
P2C9-PoP	protein	2.36378e-34	XP_002303172		Pectinesterase 2.1	6e-27	P09607		Sustractive. Pollen specific
P2C10-PoP	Glycerophosphoryl diester phosphodiesterase family protein	2.3852e-23	XP_002866252		Probable glycerophosphoryl diester phosphodiesterase 1	0.56	Q9FJ62		Non specific
P2C11-PoP	Microsomal delta-12 oleate desaturase	5.02714e-73	AAW63040		Omega-6 fatty acid desaturase, endoplasmic reticulum isozyme 2	2e-68	P48631		Non specific
P2C12-PoP					Acyl-CoA-binding protein	3,00E-04	O04066		Non specific
P2C13-PoP	Rapid alkalinization factor	0.278571	XP_003536069		Chlorophyll a-b binding protein 8, chloroplastic	0.09	P27522		Non specific
P2C14-PoP	Transferring glycosyl	9.09525e-89	XP_002524800		Glycosyltransferase 8 domain-containing protein 1	2e-15	Q6DJM3		Non specific
P2C15-PoP	Protein	4.94906e-103	XP_002520406		Sugar transport protein 1	7e-46	P23586		Sustractive. Pollen specific
P2C16-PoP	Protein	2.0428e-33	XP_002303172		Pectinesterase 2.1	2e-26	P09607		Sustractive. Pollen specific
P2C17-PoP	Actin depolymerizing factor 10	1.54195e-76	NP_194289		Actin-depolymerizing factor 2	6e-71	Q9FVI1		Non specific
P2C18-PoP	Major pollen allergen ole e partial	7.60639e-66	AAQ08188		Olee1-like protein	1e-07	O49813		Non specific
P2C19-PoP	Unknown [Populus trichocarpa]	0.0633963	ABK93930		ATP-binding cassette sub-family F member 2	0.029	Q99LE6		Sustractive. Pollen specific
P2C20-PoP	Hypothetical protein VITISV_015170 [Vitis vinifera]	2.51647e-44	CAN68990		Unknown protein	6e-19			Sustractive. Pollen specific
P2C21-PoP	Alpha peptide	60.4631	CAA75108		Unknown protein	4e-05			Sustractive. Pollen specific
P2C22-PoP	Pectate lyase	4.83478e-06	XP_003613596		Probable pectate lyase 5	2e-12	Q9FXD8		Sustractive. Pollen specific
P2C23-PoP					Triosephosphate isomerase, cytosolic	0.19	P48495		Sustractive. Pollen specific
P2C24-PoP					Unknown protein	1e-05			Non specific
P2C25-PoP	Protein	2.90562e-34	XP_002303172		Pectinesterase 2.1	6e-27	P09607		Sustractive. Pollen specific
P2C26-PoP					E3 ubiquitin-protein ligase UPL1	0.023	Q8GY23		Non specific
P2C27-PoP					Animal Zinc finger protein 706	0.72	Q9D115		Non specific
P2C28-PoP	Protein	2.76457e-06	XP_002303172		Pectinesterase 4	2e-09	O80722		Sustractive. Pollen specific
P2C29-PoP					Vacuolar-sorting protein SNF7	1e-15	Q6CJL0		Non specific
P2C30-PoP									Non specific
P2C31-PoP	Phospholipase d delta-like	4.58026e-19	XP_002306960		Phospholipase D beta 1	2e-19	P93733		Non specific
P2C32-PoP	Pectate lyase	6.49655e-118	XP_002311599		Probable pectate lyase 12	4e-51	Q9SCP2		Non specific
P2C33-PoP	Major pollen allergen ole e partial	2.67981e-67	E53806		Olee1-like protein	1e-07	O49813		Sustractive. Pollen specific
P2C34-PoP	Cysteine-rich receptor-like protein kinase	0.000142028	XP_003523519		Unknown protein	5e-17			Sustractive. Pollen specific
P2C35-PoP	Pathogenesis-related protein class i	5.04485e-10	AEH25621		Pathogenesis-related protein PR-1	0.005	Q40374		Sustractive. Pollen specific
P2C36-PoP	Actin	3.19638e-14	ABK92581		Actin-3	8e-90	P02580		Non specific
P2C37-PoP	Protein	1.96419e-31	XP_002303172		Pectinesterase 2.1	9e-27	P09607		Sustractive. Pollen specific
P2C38-PoP	Lim domain-containing protein	0.36033	NP_171683		Patellin-1	0.023	Q56WK6		Sustractive. Pollen specific
P2C39-PoP	Glyoxal oxidase-related protein	1.10116e-11	XP_002280698		Putative nucleosome assembly protein C364.06	0.64	O59797		Sustractive. Pollen specific
P2C40-PoP	Unknown [Populus trichocarpa]	0.0758043	ABK93930		Animal ATP-binding cassette sub-family F member 2	0.11	Q99LE6		Non specific
P2C41-PoP					Unknown protein	0.004			Non specific
P2C42-PoP	Tpr repeat-containing thioredoxin ttl1-like	3.2271e-74	CBI40996		Protein STIP1 homolog/ Serine/threonine-protein phosphatase 5	0.0001	Q54DA8/ Q84K11		Non specific
P2C43-PoP	Protein	1.88188e-32	XP_002276542		RNA polymerase sigma factor rpoD	0.39	P26683		Non specific
P2C44-PoP	Plasma membrane h+ atpase	4.26928e-29	ABM68570		ATPase 3, plasma membrane-type	3e-30	P20431		Sustractive. Pollen specific
P2C45-PoP	Probable pectinesterase pectinesterase inhibitor 21-like	5.92365e-25	XP_002275819		Pectinesterase 1	0.002	Q43867		Sustractive. Pollen specific
P2C46-PoP					Sex determination protein tasselseed-2/ Xanthoxin dehydrogenase/ Cyclopentanol dehydrogenase	0.7	P50160/ Q9C826 / Q937L4		Sustractive. Pollen specific
P2C47-PoP	Phosphatidylinositol- -trisphosphate 3-phosphatase and dual-specificity protein phosphatase pten	1.4063e-30	XP_002532895		Animal D-2-hydroxyglutarate dehydrogenase, mitochondrial	0.49	Q8N465		Sustractive. Pollen specific
P2C48-PoP	Subtilase family protein	2.70184e-31	CBI23066		Subtilisin-like protease/ Xylem serine proteinase 1/ Cucumisin	2e-24	O65351/ Q9LLL8/ Q39547		Sustractive. Pollen specific
P2C49-PoP	Gdsl esterase lipase at3g48460-like	3.32422e-22	XP_002267715		Anter-specific proline-rich protein APG/Esterase	2e-21	P40602/ Q7Y1X1		Non specific
P2C50-PoP					2,3-bisphosphoglycerate-independent phosphoglycerate mutase	0.064	O24246		Non specific
P2C51-PoP	Anion exchanger family protein	1.91634e-48	XP_002282436		Boron transporter 4	7e-24	Q9XI23		Non specific
P2C52-PoP	S-adenosylmethionine decarboxylase	5.6041e-42	ACE97514		S-adenosylmethionine decarboxylase proenzyme	9,00E-45	Q9M4D8		Non specific
P2C53-PoP	Alpha-expansin 3	2.09487e-48	XP_003520665		Expansin-A5	5e-42	Q38864		Non specific
P2C54-PoP							Q9FG87		Sustractive. Pollen specific
P2C55-PoP	Cell cycle regulated microtubule associated protein	3.46891e-09	XP_002866481		M protein, serotype 5/ ELKS/Rab6-interacting/CAST family member 1	0.26	P02977/ Q99MI1		Sustractive. Pollen specific
P2C56-PoP							Q9FG87		Sustractive. Pollen specific
P2C57-PoP	Zinc finger protein	1.28048e-25	BAA19111		Zinc finger protein 1	8e-33	Q42430		Non specific
P2C58-PoP	Plasma membrane h+-atpase	6.12177e-126	CAN61424		Plasma membrane ATPase	3,00E-40	Q7XPY2		Non specific
P2C59-PoP	Protein	2.60474e-37	XP_002529044		Animal Nuclear pore complex protein Nup98-Nup96	2,00E-50	P52948		Non specific
P2C60-PoP					2,3-bisphosphoglycerate-independent phosphoglycerate mutase	0.064	O24246		Non specific
P2C61-PoP	Pollen specific protein	7.5966e-47	AAQ90182		L-ascorbate oxidase homolog (Pollen-specific protein NTP303)/ Monocopper oxidase-like protein SKS2	8e-34	P29162/ Q9FHN6		Sustractive. Pollen specific
P2C62-PoP	Lat52-like protein	6.29294e-08	AFB73932		Olee1-like protein	0.0001	O49813		Non specific
P2C63-PoP	Polygalacturonase	2.26978e-117	BAA89476		Polygalacturonase	1e-52	P48979		Non specific
P2C64-PoP	Delta-12 desaturase	3.01666e-61	AFK31315		Omega-6 fatty acid desaturase, endoplasmic reticulum	1e-53	P46313		Non specific
P2C65-PoP	Probable pectinesterase pectinesterase inhibitor 21-like	2.7069e-95	XP_002275819		Pectinesterase/pectinesterase inhibitor U1	5e-43	Q43143		Non specific
P2C66-PoP	Expansin a2	0.000482343	AFK34290		Expansin-A6	2e-09	Q38865		Non specific
P2C67-PoP	Aspartyl protease family protein	1.46253e-27	CAN65806		Aspartic proteinase nepenthesin-2/ Chymosin	8e-11	Q766C2/ P18276		Non specific
P2C68-PoP					Unknown protein	0.5			Sustractive. Pollen specific
P2C69-PoP	Probable pectinesterase pectinesterase inhibitor 21-like	2.83331e-88	XP_002275819		Pectinesterase/pectinesterase inhibitor U1	2e-39	Q43143		Sustractive. Pollen specific
P2C70-PoP	Protein	2.05063e-32	XP_002303172		Pectinesterase 2.1	2e-26	P09607		Sustractive. Pollen specific
P2C71-PoP	Protein	1.14102e-08	XP_003528660		Auxin-repressed 12.5 kDa protein	1,00E-12	Q05349		Sustractive. Pollen specific
P2C72-PoP	Ole e 5 olive pollen allergen	1.70768e-55	ABX54864		Superoxide dismutase [Cu-Zn]	3e-70	O49073		Non specific
P2C73-PoP	Protein far1-related sequence 3-like	6.31208e-65	CBI29148		Unknown protein	2e-18			Non specific
P2C74-PoP	Hypothetical protein [Rosa rugosa]	4.64735e-06	AFP55590		Unknown protein	1e-05			Non specific
P2C75-PoP					Unknown protein	2e-30			Non specific
P2C76-PoP	Serine threonine protein kinase a	1.65854e-17	ACA25084		ATP-dependent Clp protease proteolytic subunit	0.008	P12210		Non specific
P2C77-PoP	Selta-12 oleate desaturase	2.92646e-31	ADZ39687		Omega-6 fatty acid desaturase, endoplasmic reticulum isozyme 2	3e-27	P48631		Non specific
P2C78-PoP	Core-2 i-branching beta- -n-acetylglucosaminyltransferase family protein	5.57658e-26	XP_003527246		Animal Xylosyltransferase oxt	9e-13	Q5QQ53		Non specific
P2C79-PoP	Probable pectinesterase pectinesterase inhibitor 21-like	7.40826e-25	XP_002275819		Pectinesterase 1	0.002	Q43867		Non specific
P2C80-PoP	4-nitrophenylphosphatase	1.93881e-81	XP_003838184		Pyridoxal phosphate phosphatase	1e-06	Q8VD52		Sustractive. Pollen specific
P2C81-PoP	Pinus taeda anonymous locus 2_1728_01 genomic sequence	7.29375e-09	XP_002519185		Unknown protein	2,00E-07			Sustractive. Pollen specific
P2C82-PoP							Q9FG87		Sustractive. Pollen specific
P2C83-PoP	Autoinhibited h+ atpase	9.84138e-160	AAA20600		Plasma membrane ATPase 3	6e-43	Q08436		Non specific
P2C84-PoP	Chaperonin-like protein	3.14611e-09	XP_002285429		Serine/threonine-protein kinase PBS1/ Phytosulfokine receptor 1	0.005	Q9FE20/ Q9ZVR7		Non specific
P2C85-PoP					Olee1-like protein	0.009	O49813		Non specific
P2C86-PoP	Pectinesterase precursor, putative [Ricinus communis]	0.0102054	XP_002516960						Sustractive. Pollen specific
P2C87-PoP	Serine threonine-protein kinase pbs1-like	8.11769e-118	XP_002271454		Serine/threonine-protein kinase PBS1/ Protein STRUBBELIG-RECEPTOR FAMILY 7	1e-101	Q9FE20/ Q9LUL4		Non specific
P2C88-PoP	Aspartic proteinase-like protein 2-like	4.69456e-81	NP_001052489		Aspartic proteinase-like protein 2	6e-33	Q9S9K4		Sustractive. Pollen specific
P2C89-PoP	Predicted protein [Populus trichocarpa]	0.0143311	XP_002317287						Sustractive. Pollen specific
P2C90-PoP					Major pollen allergen Lol p 11	8e-06	Q7M1X5		Sustractive. Pollen specific
P2C91-PoP	Protein	2.90562e-34	XP_002303172		Pectinesterase 2.1	6e-27	P09607		Sustractive. Pollen specific
P2C92-PoP	Gdsl esterase lipase	6.27237e-61	XP_002267715		Esterase/ Alpha-L-fucosidase 3	3e-19	Q7Y1X1/ Q9FXE5		Non specific
P2C93-PoP	Pectate lyase	3.07823e-30	XP_002330086		Probable pectate lyase 5	2,00E-18	Q9FXD8		Sustractive. Pollen specific
P2C94-PoP					Protein TAR1	1e-05	Q6CQE5		Sustractive. Pollen specific
P2C95-PoP					Animal DNA helicase MCM8	0.64	Q9CWV1		Sustractive. Pollen specific
P2C96-PoP	Protein	9.37757e-88	XP_003530976		Fe(3+)-Zn(2+) purple acid phosphatase 12	0.17	Q38924		Sustractive. Pollen specific
P4C1-PoP					Unknown protein	4e-05			Non specific
P4C2-PoP	Protein	9.51407e-23	XP_002303172		Pectinesterase 3	3e-20	Q96576		Non specific
P4C3-PoP					Pentatricopeptide repeat-containing protein At1g15510, chloroplastic	0.58	Q9M9E2		Non specific
P4C4-PoP	Cyclase family protein	2.38229e-32	CBI40274		Unknown protein	7,00E-30			Non specific
P4C5-PoP	Alpha-expansin 3	7.64026e-26	XP_003520665		Expansin-A5	1e-30	Q38864		Non specific
P4C6-PoP									Non specific
P4C7-PoP					Unknown protein	0.001			Non specific
P4C8-PoP	Pectate lyase	1.84038e-20	XP_002330086		Probable pectate lyase 5	2,00E-16	Q9FXD8		Sustractive. Pollen specific
P4C9-PoP	Pectate lyase	4.39102e-16	CBI22159		Probable pectate lyase 12	7e-22	Q9SCP2		Non specific
P4C10-PoP					Serine/threonine-protein phosphatase BSL1	0.009	Q8L7U5		Non specific
P4C11-PoP									Non specific
P4C12-PoP	Beta chain	2.36163e-22	XP_002283056		Tubulin beta-8 chain	7,00E-37	Q41785		Non specific
P4C13-PoP									Non specific
P4C14-PoP	Lat52-like protein	0.160235	AFB73931		Ankyrin repeat-containing protein At5g02620	0.049	Q6AWW5		Non specific
P4C15-PoP									Non specific
P4C16-PoP	Ole e protein	1.16757e-06	CAA73038		Arginine--tRNA ligase	0.3	Q3M769		Non specific
P4C17-PoP	Zinc finger ccch domain-containing protein zfn-like isoform 1	2.05052e-49	XP_003536159		Zinc finger CCCH domain-containing protein ZFN-like	6e-23	Q9SWF9		Non specific
P4C18-PoP	Clathrin assembly protein	2.07203e-21	XP_002521908		Putative clathrin assembly protein At2g01600	0.065	Q8LBH2		Non specific
P4C19-PoP	Carbonic anhydrase family protein	4.13236e-12	XP_002869914		Probable pectate lyase 18	0.16	Q9C5M8		Non specific
P4C20-PoP	Beta-galactosidase 13	2.28088e-16	CAC13966		Beta-galactosidase 10	0.08	Q9FN08		Non specific
P4C21-PoP					Replication factor C subunit 2	0.17	P0C7N7		Non specific
P4C22-PoP					Unknown protein	4e-19			Non specific
P4C23-PoP					Unknown protein	3e-08			Non specific
P4C24-PoP	Beta chain	2.28549e-23	XP_003624927		Tubulin beta-8 chain	3e-45	Q41785		Non specific
P4C25-PoP	Protein	0.000140057	XP_002278808						Non specific
P4C26-PoP	Ribonuclease h2 subunit a	4.48357e-30	XP_002311009		Ribonuclease H2 subunit A	2e-17	Q9SEZ6		Non specific
P4C27-PoP	Protein	1.07714e-21	XP_003632385		Pectinesterase 2	3e-09	Q42534		Non specific
P4C28-PoP									Non specific
P4C29-PoP	Probable pectinesterase pectinesterase inhibitor 21-like	1.05497e-12	XP_002275000						Non specific
P4C30-PoP					Unknown protein	0.002			Non specific
P4C31-PoP									Non specific
P4C32-PoP	Pollen specific protein	5.84864e-64	AAD02557		L-ascorbate oxidase homolog (Pollen-specific protein NTP303)/ Monocopper oxidase-like protein SKU5	3e-32	P29162/ Q9SU40		Sustractive. Pollen specific
P4C33-PoP	PREDICTED: uncharacterized protein LOC100245770 [Vitis vinifera]	12.2333	XP_002278808						Non specific
P4C34-PoP	Protein	1.88593e-29	XP_003530976		Unknown protein	4e-07			Non specific
P4C35-PoP	Purple acid phosphatase 17 isoform 1	2.1266e-33	XP_003530976		Unknown protein	1e-07			Non specific
P4C36-PoP									Sustractive. Pollen specific
P4C37-PoP	E-cadherin binding protein	1.33536e-17	XP_002527868		Animal E3 ubiquitin-protein ligase Hakai	9e-31	Q9JIY2		Non specific
P4C38-PoP	Armadillo beta-catenin repeat family protein	8.95277e-17	AAO00878		U-box domain-containing protein 10	0.015	Q9C9A6		Non specific
P4C39-PoP	Anion exchanger family protein	1.69818e-25	XP_002282436		Boron transporter 4	6e-14	Q9XI23		Non specific
P4C40-PoP	Pectinesterase 28	0.00247127	XP_002318979		Pectinesterase 2.1	0.0002	P09607		Sustractive. Pollen specific
P4C41-PoP	L-ascorbate oxidase-like protein	1.533e-38	AAQ90182		L-ascorbate oxidase homolog (Pollen-specific protein NTP303)/ Monocopper oxidase-like protein SKU5	2e-15	P29162/ Q9SU40		Non specific
P4C42-PoP	Pinus taeda anonymous locus 2_5100_02 genomic sequence	6.2385e-31	XP_002279164		Pectinesterase 2.1	1e-22	P09607		Sustractive. Pollen specific
P4C43-PoP	Major pollen allergen ole e 1	3.58288e-12	CAA73038		Olee1-like protein	6e-06	O49813		Sustractive. Pollen specific
P4C44-PoP	Protein	2.41701e-13	XP_002523118		Polygalacturonase	1e-07	P48979		Non specific
P4C45-PoP	Protein	2.08709e-36	AAK58515		Beta-1,3-endoglucanase 11	1e-05	Q8L868		Non specific
P4C46-PoP	Hypothetical protein ARALYDRAFT_893357 [Arabidopsis lyrata subsp. lyrata]	79.8597	XP_002886530		Unknown protein	3e-05			Non specific
P4C47-PoP	Bifunctional monodehydroascorbate reductase and carbonic anhydrase nectarin-3	0.000549544	XP_002308927		Unknown protein	0.17			Non specific
P4C48-PoP	Alpha-expansin 3	1.13041e-24	XP_003520665		Expansin-A5	2e-22	Q38864		Non specific
P4C49-PoP	Pinus taeda anonymous locus 0_1610_01 genomic sequence	8.86679e-06	AEW07441		Expansin-A4	5e-13	O48818		Non specific
P4C50-PoP	Autoinhibited h+ atpase	8.69024e-14	XP_002307856		ATPase 3, plasma membrane-type	5e-15	P20431		Non specific
P4C51-PoP	At3g14310 mln21_9	0.294546	XP_002885033		Pectinesterase 3	0.0002	Q96576		Non specific
P4C52-PoP									Non specific
P4C53-PoP	Protein	1.48424e-38	XP_002265705		Protein ETHYLENE INSENSITIVE 3	0.38	O24606		Non specific
P4C54-PoP	Alpha-expansin 3	8.35476e-21	XP_003520665		Expansin-A5	4e-25	Q38864		Non specific
P4C55-PoP	L-ascorbate oxidase homolog	5.01073e-46	XP_002523381		L-ascorbate oxid-ascorbate oxidase homolog (Pollen-specific protein NTP303)/ Monocopper oxidase-like protein SKS2	3,00E-26	P29162/ Q9FHN6		Sustractive. Pollen specific
P4C56-PoP	Lat52-like protein	5.39337e-07	AFB73931		Olee1-like protein	0.006	O49813		Sustractive. Pollen specific
P4C57-PoP	Major pollen allergen ole e 1	1.05288e-12	B53806		Olee1-like protein	0.0003	O49814		Sustractive. Pollen specific
P4C58-PoP	Phosphate transporter	4.629e-12	AFH74431		Probable inorganic phosphate transporter 1-7	1e-24	Q494P0		Non specific
P4C59-PoP					Probable protein ABIL5	0.16	Q5JMF2		Non specific
P4C60-PoP	Probable pectinesterase pectinesterase inhibitor 21-like	4.75838e-17	XP_002275819						Non specific
P4C61-PoP	Omega-6 desaturase	2.82978e-11	AAS19533		Omega-6 fatty acid desaturase, endoplasmic reticulum	2e-27	P46313		Non specific
P4C62-PoP	Probable pectinesterase pectinesterase inhibitor 21-like	7.82227e-30	XP_002275819		Pectinesterase/pectinesterase inhibitor U1	1e-13	Q43143		Non specific
P4C63-PoP	La-related protein	6.61022e-33	XP_003528499		La-related protein 7	5e-06	Q4R627		Non specific
P4C64-PoP	S-adenosylmethionine decarboxylase	3.29327e-11	ACE97522		S-adenosylmethionine decarboxylase proenzyme	9e-26	Q96471		Non specific
P4C65-PoP	Sts14 protein	9.87521	XP_002867590						Sustractive. Pollen specific
P4C66-PoP					Actin-7	0.0004	P53492		Non specific
P4C67-PoP	Pectate lyase	6.07358e-41	CAN69905		Probable pectate lyase 12	9e-33	Q9SCP2		Non specific
P4C68-PoP	E-cadherin binding protein	4.53135e-57	XP_002527868		Animal E3 ubiquitin-protein ligase Hakai	3e-63	Q9JIY2		Non specific
P4C69-PoP					Calcium-binding allergen Ole e 8/ F-box/kelch-repeat protein At1g55270/ Ubiquitin	0.029	Q9M7R0/ Q93W93/ P69326		Non specific
P4C70-PoP	PREDICTED: uncharacterized protein LOC100258590 [Vitis vinifera]	0.145458	XP_002264509		Animal Peptidyl-prolyl cis-trans isomerase FKBP4	0.89	Q02790		Non specific
P4C71-PoP	Microsomal omega-3 fatty acid desaturase	2.2014e-25	ABG88130		Omega-3 fatty acid desaturase, chloroplastic	2e-32	P48619		Non specific
P4C72-PoP									Non specific
P4C73-PoP	Pollen specific protein	3.58916e-19	AAD02557		L-ascorbate oxidase homolog (Pollen-specific protein NTP303)/ Monocopper oxidase-like protein SKU5	5e-11	P29162/ Q9SU40		Sustractive. Pollen specific
P4C74-PoP									Sustractive. Pollen specific
P4C75-PoP	Omega-6 fatty acid desaturase	1.04503e-123	AAW63041		Omega-6 fatty acid desaturase, endoplasmic reticulum isozyme 2	1e-130	P48631		Non specific
P4C76-PoP	Vacuolar iron transporter	1.30991e-18	XP_002281480		Animal Transmembrane emp24 domain-containing protein 2	0.49	Q63524		Sustractive. Pollen specific
P4C77-PoP	Protein	1.34611e-28	XP_002519226		Receptor-like protein kinase HERK 1	0.061	Q9LX66		Non specific
P4C78-PoP					Unknown protein	2e-14			Non specific
P4C79-PoP	Expansin 11 precursor	2.40814e-14	XP_003520665		Expansin-A4	3e-13	Q0DHB7		Non specific
P4C80-PoP					Putative clathrin assembly protein At5g35200	0.047	Q9LHS0		Non specific
P4C81-PoP	Pollen specific protein	2.67261e-34	ABB82549		Pollen-specific protein SF21/ NDRG-like protein	7e-38	O23969/ Q55BX3		Sustractive. Pollen specific
P4C82-PoP					Sugar transporter ERD6-like 16	0.035	Q8LBI9		Non specific
P4C83-PoP	Pectinesterase	2.50796e-43	XP_002275819		Pectinesterase 2.1	3e-28	P09607		Non specific
P4C84-PoP	Phosphate transporter	1.38739e-07	XP_002524621		Probable inorganic phosphate transporter 1-7	2e-21	Q494P0		Non specific
P4C85-PoP					CBL-interacting protein kinase 26	6e-06	Q6H7U5		Non specific
P4C86-PoP									Non specific
P4C87-PoP	Protein	1.6275e-22	XP_003633305		Animal EH domain-containing protein 1	0.17	Q641Z6		Non specific
P4C88-PoP					Sugar transporter ERD6-like 16	0.019	Q8LBI9		Non specific
P4C89-PoP					Serine/threonine-protein phosphatase BSL3	0.6	Q9SHS7		Sustractive. Pollen specific
P4C90-PoP	Microsomal delta-12 oleate desaturase	4.54798e-33	AAW63040		Omega-6 fatty acid desaturase, endoplasmic reticulum isozyme 2	2e-39	P48631		Non specific
P4C91-PoP	Pto resistance protein candidate tg- partial	4.30297e-31	ABS18369		Receptor-like protein kinase HERK 1/ Nodulation receptor kinase	1e-18	Q9LX66/ Q8L4H4		Non specific
P4C92-PoP	Clathrin light chain 1-like	9.28389e-14	XP_002329414		Unknown protein	8e-38			Non specific
P4C93-PoP	Probable pectinesterase pectinesterase inhibitor 21-like	1.64327e-10	CBI26012		Pectinesterase 1	0.44	Q43867		Non specific
P4C94-PoP	Apoplastic invertase	2.71252e-47	AAK57504		Acid beta-fructofuranosidase AIV-18	3e-15	P93761		Non specific
P4C95-PoP	Major pollen allergen ole e partial	5.96338e-36	B53806		Olee1-like protein	4e-07	O49813		Sustractive. Pollen specific
P4C96-PoP	L-ascorbate oxidase homolog	0.000432047	NP_001058771		L-ascorbate oxidase homolog (Pollen-specific protein NTP303)/ Monocopper oxidase-like protein SKU5	6e-10	P29162/ Q9SU40		Sustractive. Pollen specific
