# Supplementary material for: Identification and Functional Annotation of Genes Differentially Expressed in the Reproductive Tissues of the Olive Tree (Olea europaea L.) through the Generation of Subtractive Libraries
Source: Front Plant Sci. 2017 Sep 13;8:1576. doi: 10.3389/fpls.2017.01576 (PMC5601413; doi:10.3389/fpls.2017.01576)
Supplement: Supplementary file 3 [file Table3.XLSX]

## Sheet: Sheet1
Sample	BLAST NCBI DATABASE	eValue (<E-04)	Accesion number		BLAST OLEAEST DATABASE	eValue	Id Uniprot		Screening Results
P1C1-PPo	Ras-related protein rabh1b	7.81e-05	XP_003601948		Ras-related protein Rab-6A	5e-15	Q5RAV6		Non specific			Sequences without a significant similarity are boxed in orange
P1C2-PPo					Lactase-like protein	0.28	Q6UWM7		Non specific
P1C3-PPo					ATP synthase subunit alpha, mitochondrial	5e-10	P92549		Non specific
P1C4-PPo	Unnamed protein product [Vitis vinifera]	1.3e-07	CBI21800		Unknown protein	0.042			Non specific
P1C5-PPo					Unknown protein	7e-12			Sustractive. Pistil specific
P1C6-PPo					Unknown protein	0.087			Sustractive. Sustractive. Pistil specific
P1C7-PPo					Putative uncharacterized protein ART2; Regulator of rDNA transcription protein 15	0.96	Q8TGM7		Non specific
P1C8-PPo					Unknown protein	0.023			Non specific
P1C9-PPo					Multicystatine; Cysteine proteinase inhibitor A	6e-30	Q10992		Sustractive. Pistil specific
P1C10-PPo					Unknown protein	9e-37			Sustractive. Pistil specific
P1C11-PPo					Unknown protein	3e-05			Sustractive. Pistil specific
P1C12-PPo					Multicystatine; Cysteine proteinase inhibitor A	3e-26	Q10992		Sustractive. Pistil specific
P1C13-PPo					Disease resistance response protein 206	2e-25	P13240		Sustractive. Pistil specific
P1C14-PPo	Pinus taeda anonymous locus 2_6635_01 genomic sequence	1.72e-08	NP_001233896		Probable alpha,alpha-trehalose-phosphate synthase [UDP-forming]	2e-33	Q9LRA7		Non specific
P1C15-PPo					Serine/threonine-protein kinase PBS1	0.0005	Q9FE20		Non specific
P1C16-PPo	Prolyl-trna synthetase associated domain-containing protein 1-like	2.17e-11	XP_002284446		Unkown protein	3e-66			Non specific
P1C17-PPo					Unkown protein	3e-21			Non specific
P1C18-PPo					Unkown protein	4e-26			Non specific
P1C19-PPo	F1-atpase alpha subunit	1.45e-26	ACU30206		ATP synthase subunit alpha, mitochondrial	1e-38	P92549		Non specific
P1C20-PPo	Thaumatin-like protein	4.25e-15	BAD90814		Thaumatin-like protein, Pathogenesis-related protein 5	5e-27	P50699		Sustractive. Pistil specific
P1C21-PPo	Glycosyl hydrolase family 1	6.16e-41	AAL93619		Beta-glucosidase, chloroplastic	2e-68	P49235		Sustractive. Pistil specific
P1C22-PPo	Beta-glucosidase g1	2.46e-60	AAL93619		Beta-glucosidase, chloroplastic	2e-73	P49235		Sustractive. Pistil specific
P1C23-PPo	Protein	6.94e-21	XP_002512678		Transaldolase	2e-44	A0LTY8		Sustractive. Pistil specific
P1C24-PPo					Unkown protein	0.005			Sustractive. Pistil specific
P1C25-PPo					Thaumatin-like protein, Pathogenesis-related protein 5	2e-06	P50699		Sustractive. Pistil specific
P1C26-PPo					Unkown protein	2e-06			Sustractive. Pistil specific
P1C27-PPo					Ribulose bisphosphate carboxylase/oxygenase activase, chloroplastic	4e-16	Q40281		Non specific
P1C28-PPo					Acetyl-coenzyme A carboxylase carboxyl transferase subunit beta, chloroplastic	7e-22	P12219		Non specific
P1C29-PPo					40S ribosomal protein S9	0.0001	P49214		Non specific
P1C30-PPo	Ubiquitin-like protein	1e-23	XP_002872746		Ubiquitin	4,00E-32	P69326		Non specific
P1C31-PPo	Caffeoyl- 3-o-methyltransferase	2.3e-29	AAT75320		Caffeoyl-CoA O-methyltransferase	1e-34	Q43095		Sustractive. Pistil specific
P1C32-PPo					Thaumatin-like protein, Pathogenesis-related protein 5	0.11	P28493		Sustractive. Pistil specific
P1C33-PPo	Wrky 10	4.71e-30	CAP12788		Probable WRKY transcription factor 4	3e-14	Q9XI90		Non specific
P1C34-PPo					Unknown protein; Photosystem Q(B) protein	0.006	Q0ZJ40		Non specific
P1C35-PPo	Monocopper oxidase-like protein sku5	2.89e-16	XP_002532575		Polyneuridine-aldehyde esterase/ (S)-hydroxynitrile lyase/ Probable esterase PIR7A	4,00E-30	Q9SE93/ P52704/ Q0JG98		Non specific
P1C36-PPo					Unknown protein	1e-41			Non specific
P1C37-PPo					Glucan endo-1,3-beta-glucosidase 3	0.28	Q9ZU91		Sustractive. Pistil specific
P1C38-PPo					Gibberellin-regulated protein 3	1e-13	P46687		Sustractive. Pistil specific
P1C39-PPo					Cysteine proteinase inhibitor A	8e-57	Q10992		Non specific
P1C40-PPo	Disease resistance response protein partial	2.19e-09	AFP49319		Disease resistance response protein 206	4e-66	P13240		Sustractive. Pistil specific
P1C41-PPo					Light-inducible protein CPRF2	9e-13	Q99090		Sustractive. Pistil specific
P1C42-PPo	Protein	2.92e-08	XP_002315515		Putative 60S ribosomal protein L22-2	3e-49	Q9M9W1		Non specific
P1C43-PPo					Unknown protein	5e-06			Non specific
P1C44-PPo					Cysteine proteinase inhibitor A	3e-18	Q10992		Non specific
P1C45-PPo					Unknown protein	8e-05			Non specific
P1C46-PPo	Nucleotide-sugar transporter family protein	5.42e-16	XP_002869276		Mouse and Human solute carrier family 35 member C2/ Uncharacterized transporter C22E12.01 (Schizosaccharomyces pombe)	1e-28	Q8VCX2/ Q10354		Sustractive. Pistil specific
P1C47-PPo					Cysteine proteinase inhibitor A	2e-09	Q10992		Non specific
P1C48-PPo	Gdsl esterase lipase at5g33370-like	2.81e-30	AAP35038		Anter-specific proline-rich protein APG; Esterase	2e-63	P40602/ Q7Y1X1		Sustractive. Pistil specific
P1C49-PPo					Unkwon protein	2e-12			Sustractive. Pistil specific
P1C50-PPo					Unkwon protein	0.003			Sustractive. Pistil specific
P1C51-PPo	PREDICTED: uncharacterized protein LOC100780626 [Glycine max]	0.000106	XP_003522734		Unkwon protein	9e-27			Non specific
P1C52-PPo	Fructokinase 2	2.48e-06	AAA80675		Fructokinase-2	1e-29	Q42896		Non specific
P1C53-PPo	Beta-glucosidase d4	1.85e-36	ACD43481		Beta-glucosidase, chloroplastic	5e-57	P49235		Sustractive. Pistil specific
P1C54-PPo	Photosystem II 32kda partial	1.05e-21	AAQ91580		Photosystem Q(B) protein	1e-37	Q0ZJ40		Non specific
P1C55-PPo					Unkwon protein	2e-15			Non specific
P1C56-PPo	Thaumatin-like protein	0.00488	BAA74546		Thaumatin-like protein/ Pathogenesis-related protein 5	1e-08	P50699/ P28493		Sustractive. Pistil specific
P1C57-PPo					Unknown protein	2e-06			Sustractive. Pistil specific
P1C58-PPo	Gtp-binding nuclear protein ran-3-like	4.8e-09	ACX81221		GTP-binding nuclear protein Ran/TC4	1e-19	P38548		Non specific
P1C59-PPo					Serine/threonine-protein kinase HT1/ Putative serine/threonine-protein kinase/receptor R826	0.057	Q2MHE4/ Q7T6X2		Sustractive. Pistil specific
P1C60-PPo	Translation initiation factor eif-2 beta subunit	3.2e-11	AFK36776		Eukaryotic translation initiation factor 2 subunit beta	1,00E-15	O24473		Non specific
P1C61-PPo					Eukaryotic peptide chain release factor subunit 1-3	4e-19	P35614		Non specific
P1C62-PPo					Dehydrin Rab18/ LEA:Late embryogenesis abundant protein	2e-12	P30185/ P21298		Sustractive. Pistil specific
P1C63-PPo	Proteasome subunit alpha type 3	3.77e-27	NP_001236912		Proteasome subunit alpha type-3	3e-36	Q9LSU0		Sustractive. Pistil specific
P1C64-PPo	Chloroplast light-harvesting chlorophyll a b-binding protein	1.57e-17	ACI87809		Chlorophyll a-b binding protein 21, chloroplastic	3e-23	P27493		Sustractive. Pistil specific
P1C65-PPo					Unkwon protein	1e-34			Non specific
P1C66-PPo	Cysteine protease	44	AAS21216		Multicystatine; Cysteine proteinase inhibitor A	1e-52	Q10992		Sustractive. Pistil specific
P1C67-PPo					Unknown protein/ Aldehyde dehydrogenase 22A1	0.031	Q0WSF1		Sustractive. Pistil specific
P1C68-PPo					Multicystatine; Cysteine proteinase inhibitor A	5e-36	Q10992		Sustractive. Pistil specific
P1C69-PPo					Unkwon protein	1e-09			Sustractive. Pistil specific
P1C70-PPo					Multicystatine; Cysteine proteinase inhibitor A	1e-49			Sustractive. Pistil specific
P1C71-PPo	Acid phosphatase 1-like	0.829	XP_002335957		Acid phosphatase 1/ Stem 28 kDa glycoprotein/ Stem 31 kDa glycoprotein	2e-23	P27061/ P15490/ P10742		Non specific
P1C72-PPo					Dehydration-responsive protein RD22 / Polygalacturonase-1 non-catalytic subunit beta	0.0048	Q08298/ Q40161		Non specific
P1C73-PPo					Unknown protein	0.003			Non specific
P1C74-PPo					Protein TAR1	0.0002	Q6CQE5		Non specific
P1C75-PPo	Psi reaction center subunit II	3.68e-08	CAA32182		Photosystem I reaction center subunit II, chloroplastic	1e-29	P12372		Sustractive. Pistil specific
P1C76-PPo	Myb family transcription factor	7.04e-06	CAN66504		Unkwon protein	2e-36			Sustractive. Pistil specific
P1C77-PPo	Heat shock factor 6	1.91e-22	XP_002318823		Heat stress transcription factor B-2a	1e-32	Q9SCW4		Sustractive. Pistil specific
P1C78-PPo					Unknown protein	2e-29			Sustractive. Pistil specific
P1C79-PPo					Unknown protein	0.11			Sustractive. Pistil specific
P1C80-PPo	Alcohol dehydrogenase class III	6.7e-09	XP_002301836		Alcohol dehydrogenase class-3	6e-20	P93629		Non specific
P1C81-PPo	Protein	0.000675	XP_003538553		60S ribosomal protein L17-2	1e-46	P51413		Non specific
P1C82-PPo					Animal 3-hydroxyisobutyryl-CoA hydrolase, mitochondria	1e-20	Q6NVY1		Non specific
P1C83-PPo	Alcohol acyltransferase partial	1.25e-13	BAA93453		Uncharacterized acetyltransferase At3g50280/ Anthranilate N-benzoyltransferase protein 2	1e-40	Q9SND9/ O23917		Sustractive. Pistil specific
P1C84-PPo					Multicystatine; Cysteine proteinase inhibitor A	3e-19	Q10992		Sustractive. Pistil specific
P1C85-PPo					Unknown protein	0.35			Non specific
P1C86-PPo	Transcription factor apetala2	5.43e-12	ADV02331		Floral homeotic protein APETALA 2/ AP2-like ethylene-responsive transcription factor TOE3	3e-40	P47927/ Q9FH95		Sustractive. Pistil specific
P1C87-PPo					Unknown protein	5e-09			Sustractive. Pistil specific
P1C88-PPo					Unknown protein	0.006			Sustractive. Pistil specific
P1C89-PPo					Unknown protein	0.027			Sustractive. Pistil specific
P1C90-PPo					Unknown protein	0.0004			Sustractive. Pistil specific
P1C91-PPo					Unknown protein	0.0006			Sustractive. Pistil specific
P1C92-PPo	Atp-dependent zinc metalloprotease -like	1.7e-18	XP_002303302		ATP-dependent zinc metalloprotease FtsH	2e-21	O19922		Sustractive. Pistil specific
P1C93-PPo	Universal stress protein family protein	8.24e-24	CAN67424		Unknown protein	2e-80			Sustractive. Pistil specific
P1C94-PPo	Mal d	1.7e-18	XP_002274108		Major allergen Pru ar 1/ Ribonuclease 1	4e-26	O50001/ P80889		Non specific
P1C95-PPo	Beta-glucosidase g1	1.52e-33	AAL93619		Beta-glucosidase, chloroplastic	2e-68	P49235		Sustractive. Pistil specific
P1C96-PPo					Unknown protein	0.0004			Non specific
P2C1-PPo					Aspartic proteinase nepenthesin-2	0.003	Q766C2		Non specific
P2C2-PPo	Chlorophyll a b binding protein	4.69e-143	XP_002531690		Chlorophyll a-b binding protein, chloroplastic	1e-175	P12332		Non specific
P2C3-PPo	Protein	2.68e-24	XP_002307245		Polyneuridine-aldehyde esterase/ (S)-hydroxynitrile lyase/ Probable esterase PIR7A	1e-53	Q9SE93/ P52704/ Q0JG98		Sustractive. Pistil specific
P2C4-PPo	Hypothetical protein MTR_1g005050 [Medicago truncatula]	1.52e-15	XP_003588264		NADH-ubiquinone oxidoreductase chain 4	8e-67	P93313		Non specific
P2C5-PPo	Histone h2a	2.03e-34	AEC10950		Probable histone H2A.6	9e-87	Q75L11		Non specific
P2C6-PPo					Cytochrome b	8e-71	P07747		Non specific
P2C7-PPo	5 -methylthioadenosine s-adenosylhomocysteine nucleosidase	9.46e-37	CCJ09766		MTA/SAH nucleosidase/ Bark storage protein A	2e-87	P67656/ Q07469		Sustractive. Pistil specific
P2C8-PPo					MTA/SAH nucleosidase/ Bark storage protein A	2e-16	P67656/ Q07470		Sustractive. Pistil specific
P2C9-PPo					Unknown protein	0.0002			Non specific
P2C10-PPo					60S ribosomal protein L7a-2	0.29	Q9LZH9		Non specific
P2C11-PPo	Glucose acyltransferase	1.13e-20	Q43593		Acyl-[acyl-carrier-protein] desaturase, chloroplastic	8,00E-55	Q43593		Non specific
P2C12-PPo	Glucose acyltransferase	1.13e-20	Q43593		Acyl-[acyl-carrier-protein] desaturase, chloroplastic	8,00 E-55	Q43594		Non specific
P2C13-PPo	actin depolymerizing factor 2	1.46e-82	ABD66505		Actin-depolymerizing factor 2	1e-97	Q9FVI1		Non specific
P2C14-PPo	Wrky transcription factor	2.11e-45	XP_002323675		Probable WRKY transcription factor 70	2e-45	Q9LY00		Non specific
P2C15-PPo	Med23_arath ame: full=mediator of rna polymerase ii transcription subunit 23	4.6e-100	CBI26849		60S ribosomal protein L10a-3	2e-12	P59231		Non specific
P2C16-PPo	Auxin-responsive protein	7.63e-84	XP_002533060		Unknown protein	1e-55			Non specific
P2C17-PPo					Unknown protein	2e-36			Non specific
P2C18-PPo	Chromatin remodeling complex subunit	4.67e-28	XP_002308925		Transketolase, chloroplastic	0.075	Q43848		Non specific
P2C19-PPo					Unknown protein	0.25			Non specific
P2C20-PPo	Serine threonine protein phosphatase	2.65e-75	NP_001169882		Serine/threonine-protein phosphatase BSL3	4e-83	Q9SHS7		Sustractive. Pistil specific
P2C21-PPo	60s ribosomal protein l17-2-like	8.13e-103	AEC10957		60S ribosomal protein L17-2	1e-110	P51413		Non specific
P2C22-PPo	Mitogen-activated protein kinase kinase	2.2e-27	ADD62693		Mitogen-activated protein kinase kinase 5	4e-45	Q8RXG3		Non specific
P2C23-PPo	Mitochondrial import inner membrane translocase subunit tim13	6.61e-16	XP_002518947		Mitochondrial import inner membrane translocase subunit Tim13	1e-24	Q9XGY5		Sustractive. Pistil specific
P2C24-PPo	Peptidyl-prolyl cis-trans isomerase cyp20-1	2.06e-55	ABS30424		Peptidyl-prolyl cis-trans isomerase CYP20-1	6e-62	Q9SP02		Non specific
P2C25-PPo					SUMO-conjugating enzyme UBC9	4e-32	P35132		Non specific
P2C26-PPo	Chromatin remodeling complex subunit	4.67e-28	XP_002308925		Unknown protein	4e-47			Non specific
P2C27-PPo	Hypothetical protein [Nicotiana tabacum]	1.48e-12	CAJ32479		Unknown protein	1e-35			Non specific
P2C28-PPo	Homeobox-leucine zipper protein athb-15	2.79e-82	CBI36079		Homeobox-leucine zipper protein ATHB-15		Q9ZU11		Non specific
P2C29-PPo	Phosphoglycerate kinase	1.77e-95	ACJ11718		Phosphoglycerate kinase, cytosolic	1e-128	Q42962		Non specific
P2C30-PPo					Bark storage protein A/ MTA/SAH nucleosidase	9e-19	Q07469/ P67656		Sustractive. Pistil specific
P2C31-PPo	Pollen ole e 1 allergen and extensin family protein	2.19e-06	XP_003522734		Unknown protein	2e-54			Sustractive. Pistil specific
P2C32-PPo	Light-regulated zinc finger protein 1	2.2e-66	XP_002283666		Probable salt tolerance-like protein At1g78600	1e-43	Q9SYM2		Sustractive. Pistil specific
P2C33-PPo	Peptidyl-prolyl cis-trans isomerase cyp20- chloroplastic-like	2.4e-104	XP_002514874		Peptidyl-prolyl cis-trans isomerase CYP20-2, chloroplastic		Q9ASS6		Non specific
P2C34-PPo	Protein	9.09e-32	XP_002307245		Polyneuridine-aldehyde esterase/ (S)-hydroxynitrile lyase/ Probable esterase PIR7A	9e-68	Q9SE93/ P52704/ Q0JG98		Sustractive. Pistil specific
P2C35-PPo	Nhl repeat-containing protein 2-like	41.7	CAN61591		Unknown protein	2e-46			Non specific
P2C36-PPo	Thiamin biosynthetic enzyme	3.78e-07	CCJ09780		Thiamine thiazole synthase, chloroplastic	2e-39	O23787		Sustractive. Pistil specific
P2C37-PPo					Unknown protein	0.002			Sustractive. Pistil specific
P2C38-PPo					Beta-(1,2)-xylosyltransferase	0.1	Q9LDH0		Non specific
P2C39-PPo	Rapid alkalinization factor	4.4e-05	XP_003637105		Unknown protein	2e-10			Non specific
P2C40-PPo	Partial	5.57e-41	NP_001234783		Auxin response factor 12	2e-79	Q0J951		Sustractive. Pistil specific
P2C41-PPo	Glutathione s-transferase	1.81e-07	AFK45563		Glutathione S-transferase F10	2e-10	P42761		Non specific
P2C42-PPo	Protein	1.56e-37	XP_003521727		Unknown protein	7e-20			Non specific
P2C43-PPo	Peptidyl-prolyl cis-trans isomerase cyp20-1	2.13e-62	ABS30424		Peptidyl-prolyl cis-trans isomerase CYP20-1	2e-67	Q9SP02		Non specific
P2C44-PPo	Myb family transcription factor	1.14e-78	XP_003594367		Putative Myb family transcription factor At1g14600/ Two-component response regulator ARR18	2e-54	Q700D9/ Q9FGT7		Sustractive. Pistil specific
P2C45-PPo					E3 ubiquitin-protein ligase RGLG2	2e-14	Q9LY87		Non specific
P2C46-PPo					Phosphoprotein ECPP44/ Dehydrin COR410	0.046	Q9XJ56/ P46524		Non specific
P2C47-PPo					Unknown protein	0.0006			Non specific
P2C48-PPo	Late blight resistance identical	2.37e-18	BAD15107		Putative late blight resistance protein homolog R1B-17	2e-35	Q6L403		Non specific
P2C49-PPo	Glutamine synthetase	6.5e-61	BAD94507		Glutamine synthetase	3e-56	P23712		Non specific
P2C50-PPo	Magnesium-chelatase subunit	3.78e-38	ABK94717		Magnesium-chelatase subunit H	6e-37	Q9RFD5		Sustractive. Pistil specific
P2C51-PPo	Auxin response factor 8	0.113	CAQ43070		Auxin response factor 8	1e-10	Q9FGV1		Sustractive. Pistil specific
P2C52-PPo	Ubiquitin-like protein	4.3e-85	ABF06579		Ubiquitin		P69326		Non specific
P2C53-PPo					V-type proton ATPase subunit d2	2e-22	Q9LHA4		Non specific
P2C54-PPo					Unknown protein	0.012			Non specific
P2C55-PPo	Apocytochrome b	2.69e-21	YP_004927538		Cytochrome b	1e-180	P07747		Non specific
P2C56-PPo	Trehalose-phosphate synthase	6.63e-31	XP_002304347		Alpha,alpha-trehalose-phosphate synthase [UDP-forming] 5	3,00E-51	O23617		Non specific
P2C57-PPo					Unknown protein	0.35			Non specific
P2C58-PPo	Hydroquinone glucosyltransferase	2.65e-39	BAI65909		Anthocyanidin 5,3-O-glucosyltransferase/ UDP-glycosyltransferase 72B1	1e-21	Q4R1I9/ Q9M156		Non specific
P2C59-PPo	Disease resistance response protein 206	2.47e-25	CAN69110		Disease resistance response protein 206	1e-101	P13240		Sustractive. Pistil specific
P2C60-PPo	Cysteine inhibitor 1	0.141	ADD69946		Cysteine proteinase inhibitor A	3e-84	Q10992		Non specific
P2C61-PPo	Zinc finger	4.71e-100	XP_002319125		Anter-specific proline-rich protein APG/ Esterase	1e-161	P40602/ Q7Y1X1		Sustractive. Pistil specific
P2C62-PPo	Protein	3.16e-65	XP_002275316		Unknown protein	1e-43			Sustractive. Pistil specific
P2C63-PPo	Histone h4	9.94e-47	ACG30677		Histone H4	1e-70	Q76H85		Non specific
P2C64-PPo					Unknown protein	1e-123			Non specific
P2C65-PPo	Calnexin-like protein	1.56e-41	NP_001234129		Calnexin homolog	1e-52	Q39994		Sustractive. Pistil specific
P2C66-PPo					Probable non-specific lipid-transfer protein AKCS9	2e-21	Q43681		Sustractive. Pistil specific
P2C67-PPo					Unknown protein	0.0002			Non specific
P2C68-PPo	Wrky transcription factor 57	9.98e-16	XP_003594714		Probable WRKY transcription factor 4	5e-17	Q9XI90		Non specific
P2C69-PPo	M030_arath ame: full=uncharacterized mitochondrial protein g00030 ame: full=orf107a	2.76e-14	YP_173374		Uncharacterized mitochondrial protein AtMg00030	4e-29	P93276		Sustractive. Pistil specific
P2C70-PPo	4-coumarate: ligase	2.35e-128	ACL31667		4-coumarate--CoA ligase 2	3e-31	O24146		Sustractive. Pistil specific
P2C71-PPo	Glucan endo- -beta-glucosidase	1.14e-32	XP_003631648		Glucan endo-1,3-beta-glucosidase 14	7e-19	Q9ZQG9		Sustractive. Pistil specific
P2C72-PPo	Protein	4.89e-18	XP_002526071		Unknown protein	4e-56			Non specific
P2C73-PPo	Lipoxygenase	4.58e-48	ACD43484		Probable lipoxygenase 6	7e-26	Q8H016		Non specific
P2C74-PPo					Animal Apoptotic chromatin condensation inducer in the nucleus	2e-06	Q9JIX8		Sustractive. Pistil specific
P2C75-PPo	Disease resistance response protein 206	7.11e-25	BAF02555		Disease resistance response protein 206	1e-101	P13240		Sustractive. Pistil specific
P2C76-PPo					NAC domain-containing protein 48	1e-10	Q7F2L3		Sustractive. Pistil specific
P2C77-PPo					Unknown protein	0.43			Sustractive. Pistil specific
P2C78-PPo	40s ribosomal protein s9	2.25e-112	AAU93594		40S ribosomal protein S9-2	7e-75	Q9FLF0		Sustractive. Pistil specific
P2C79-PPo	Chloroplast ferredoxin i	9.31e-09	P81373		Ferredoxin-1, chloroplastic	1e-46	O04683		Non specific
P2C80-PPo	DNA repair protein rad23-3	3.88e-22	CAB51544		Putative DNA repair protein RAD23-3	3e-27	Q84L31		Sustractive. Pistil specific
P2C81-PPo	Glutathione S-transferase	1.97e-30	CAI51314		Glutathione S-transferase	1e-47	P46423		Non specific
P2C82-PPo	Somatic embryogenesis receptor-like kinase-like protein	4.13e-30	NP_001234626		BRASSINOSTEROID INSENSITIVE 1-associated receptor kinase 1/ Putative cysteine-rich receptor-like protein kinase 33	2e-29	Q94F62/ Q9LDN1		Sustractive. Pistil specific
P2C83-PPo					DEAD-box ATP-dependent RNA helicase 11	9e-05	Q8LA13		Sustractive. Pistil specific
P2C84-PPo	Histone h2b	2.39e-52	NP_200799		Histone H2B	1e-89	O22582		Sustractive. Pistil specific
P2C85-PPo	Zinc finger protein zat10-like	6.41e-10	AAC06243		Unknown protein	2e-43			Sustractive. Pistil specific
P2C86-PPo					Uncharacterized mitochondrial protein AtMg00030	3e-07	P93276		Sustractive. Pistil specific
P2C87-PPo	Avr9 elicitor response protein	2.56e-65	XP_003523469		Beta-1,3-galactosyltransferase sqv-2	4e-45	Q9N491		Sustractive. Pistil specific
P2C88-PPo					Coatomer subunit beta-2	0.0003	Q9SV20		Sustractive. Pistil specific
P2C89-PPo					Ubiquinol-cytochrome c reductase complex 6.7 kDa protein	0.72	P48505		Non specific
P2C90-PPo	RNA recognition motif-containing protein	5.95e-08	XP_003539370		Heterogeneous nuclear ribonucleoprotein A1, A2/B1 homolog/ RNA-binding protein Musashi homolog 2/ Uncharacterized RNA-binding protein C660.15/ Nuclear polyadenylated RNA-binding protein 4	7e-22	P21522/ Q920Q6/ O94432/ Q99383		Sustractive. Pistil specific
P2C91-PPo	At4g01050 f2n1_31	1.89e-34	XP_003633983		Rhodanese-like domain-containing protein 4, chloroplastic	5e-81	Q9M158		Non specific
P2C92-PPo					ADP-ribosylation factor 2	0.072	P51823		Non specific
P2C93-PPo					Unknown protein	9e-05			Non specific
P2C94-PPo	Stem 28 kda glycoprotein	2.16e-47	XP_002299744		Acid phosphatase 1/ Stem 28 kDa glycoprotein/ Stem 31 kDa glycoprotein	1e-92	P27061/ P15490/ P10742		Sustractive. Pistil specific
P2C95-PPo	60s ribosomal protein l8	4.36e-61	AEX91926		60S ribosomal protein L8	2e-70	P29766		Sustractive. Pistil specific
P2C96-PPo	Stp synthase cf0 c subunit	3.91e-19	BAH11228		ATP synthase subunit a, chloroplastic/ 30S ribosomal protein S2, chloroplastic	1e-39	P30391/ P06355		Sustractive. Pistil specific
P3C1-PPo	Cox19-like chch family protein	1.35e-37	XP_002285635		Unknown protein	5e-80			Sustractive. Pistil specific
P3C2-PPo									Non specific
P3C3-PPo					Squamosa promoter-binding-like protein 7	6e-71	Q7XT42		Non specific
P3C4-PPo					Protein PROTON GRADIENT REGULATION 5, chloroplastic	0.001	Q9SL05		Non specific
P3C5-PPo	Nucleoside diphosphate kinase	8.9e-75	Q56E62		Nucleoside diphosphate kinase	1e-130	Q9M7P6		Non specific
P3C6-PPo	O-fucosyltransferase family protein	3.49e-13	XP_002275416		DUF246 domain-containing protein At1g04910	7,00E-34	Q8W486		Non specific
P3C7-PPo					Unknown protein	2e-53			Sustractive. Pistil specific
P3C8-PPo	Gonadotropin beta chain	2.12e-37	XP_002520219		Gibberellin-regulated protein 3	1e-87	P46687		Sustractive. Pistil specific
P3C9-PPo									Non specific
P3C10-PPo					Unknown protein	6e-74			Non specific
P3C11-PPo	Cytochrome p450	7.48e-47	AAZ39642		Small heat shock protein C2	1e-71	Q4UKR8		Non specific
P3C12-PPo	Protein	5.26e-09	XP_002308729		Animal Solute carrier family 35 member D3	1e-19	Q8BGF8		Non specific
P3C13-PPo					Abscisic stress-ripening protein 1/ G-box-binding factor	3e-78	Q08655/ P36417		Non specific
P3C14-PPo					Photosystem Q(B) protein	8e-07	Q0ZJ40		Non specific
P3C15-PPo					Ethylene-responsive transcription factor RAP2-10	3e-21	Q9SW63		Non specific
P3C16-PPo	Cysteine inhibitor 1	0.00981	ADD69946		Cysteine proteinase inhibitor A	1e-109	Q10992		Non specific
P3C17-PPo	Cysteine proteinase inhibitor	0.324	ABK20185		Cysteine proteinase inhibitor A	2e-87	Q10993		Non specific
P3C18-PPo	Protein	8.74e-07	XP_003637105		Unknown protein	7e-11			Non specific
P3C19-PPo					Ubiquitin	0.072	P69326		Non specific
P3C20-PPo	Partial	8.54e-29	XP_002884856		Unknown protein	1e-52			Non specific
P3C21-PPo	Nad -linked oxidoreductase-like protein	1.7e-45	AAC23647		Aldose reductase/ Probable NAD(P)H-dependent oxidoreductase 2/ Alcohol dehydrogenase [NADP(+)]	2e-81	P23901/ Q7G765/ P14550		Non specific
P3C22-PPo	Unknown [Populus trichocarpa]	0.0975	ABK93930		F-box protein At1g70590	0.82	Q94C27		Non specific
P3C23-PPo					Dof zinc finger protein DOF3.1	7e-10	Q94AR6		Non specific
P3C24-PPo					Beta-glucosidase, chloroplastic	1e-07	P49235		Non specific
P3C25-PPo	Nadp-dependent malic enzyme	1.05e-63	AAB19243		NADP-dependent malic enzyme, chloroplastic	3e-79	P36444		Non specific
P3C26-PPo	Glutamine synthetase	1.25e-115	AAK08103		Glutamine synthetase	1e-148	P23712		Non specific
P3C27-PPo					Unknown protein	2e-06			Non specific
P3C28-PPo					Histone-lysine N-methyltransferase ATX1	0.59	Q9C5X4		Non specific
P3C29-PPo					Protein TAR1	0.013	Q8TGM6		Non specific
P3C30-PPo	Protein	1.35e-13	CAN62265		DnaJ protein homolog	0.083	Q04960		Non specific
P3C31-PPo					Inosine-5'-monophosphate dehydrogenase/ Uncharacterized protein MJ1426/ Inosine-5'-monophosphate dehydrogenase	5,00E-09	P42851/ Q58821/ O58045		Non specific
P3C32-PPo	Water channel protein	2.04e-31	ABI93215		Probable aquaporin PIP1-2	9e-58	Q7XSQ9		Sustractive. Pistil specific
P3C33-PPo	Par-1a protein	1.95e-66	NP_001242705		Unknown protein	3e-29			Non specific
P3C34-PPo	Nudix hydrolase chloroplastic-like	9.11e-88	CBI28168		Nudix hydrolase 19, chloroplastic	1e-60	Q94A82		Non specific
P3C35-PPo	Ribosomal rna methyltransferase nop2-like	1.19e-72	CAN71575		Putative ribosomal RNA methyltransferase NOP2	4e-87	Q922K7		Non specific
P3C36-PPo	Rapid alkalinization factor	1.71e-07	XP_003637105		Unknown protein	4e-23			Non specific
P3C37-PPo	Histone h4	5.52e-42	EHB12217		Histone H4	1e-67			Non specific
P3C38-PPo	Elongation factor 1-	3.27e-149	AAC15413		Elongation factor 1-alpha	1e-160	P43643		Sustractive. Pistil specific
P3C39-PPo					Protein TAR1	0.022	Q6CQE5		Non specific
P3C40-PPo	Elongation factor 1-	1.47e-62	XP_002538495		Elongation factor 1-alpha	1e-92	P43643		Sustractive. Pistil specific
P3C41-PPo									Sustractive. Pistil specific
P3C42-PPo					Unknown protein	0.0002			Non specific
P3C43-PPo	Mpbq msbq methyltransferase 2	2.73e-54	XP_002520956		37 kDa inner envelope membrane protein, chloroplastic/ Uncharacterized protein MJ1123/ 2-methoxy-6-polyprenyl-1,4-benzoquinol methylase, mitochondrial	3e-57	P23525/ Q58523/ Q4G064		Non specific
P3C44-PPo					Protein TAR1	0.28	Q6CQE5		Non specific
P3C45-PPo					Unknown protein	0.22			Non specific
P3C46-PPo	Mo25-like protein	2.72e-33	XP_002279174		Peroxidase 72	0.18	Q9FJZ9		Non specific
P3C47-PPo	Thaumatin-like protein	5.87e-96	BAA74546		Thaumatin-like protein/ Pathogenesis-related protein 5	5e-72	P50699/ P28493		Sustractive. Pistil specific
P3C48-PPo	Thaumatin-like protein	1.39e-105	BAA74546		Thaumatin-like protein/ Pathogenesis-related protein 6	2e-77	P50699/ P28494		Sustractive. Pistil specific
P3C49-PPo					ZF-HD homeobox protein At4g24660	1e-66	Q9SB61		Non specific
P3C50-PPo	Thaumatin-like protein	6.64e-13	AAK59275		Osmotin-like protein OSML13	7e-48	P50701		Sustractive. Pistil specific
P3C51-PPo					Protein TAR1	3e-06	Q6CQE5		Non specific
P3C52-PPo					Unknown protein	3e-42			Sustractive. Pistil specific
P3C53-PPo					Putative nucleosome assembly protein C364.06	0.1	O59797		Non specific
P3C54-PPo					Unknown protein	2e-52			Non specific
P3C55-PPo	Protein	1.81e-33	XP_002307245		Polyneuridine-aldehyde esterase/ (S)-hydroxynitrile lyase/ Probable esterase PIR7A	9e-68	Q9SE93/ P52704/ Q0JG98		Non specific
P3C56-PPo	Nadph2:quinone reductase	4.91e-153	ACJ11251		Quinone oxidoreductase	5e-57	P40783		Non specific
P3C57-PPo	Brassinosteroid insensitive 1-associated receptor kinase 1 expressed	7.94e-36	CBI25866		BRASSINOSTEROID INSENSITIVE 1-associated receptor kinase 1/ Putative cysteine-rich receptor-like protein kinase 33/ Wall-associated receptor kinase 5	4e-54	Q94F62/ Q9LDN1/ Q9LMN7		Non specific
P3C58-PPo	Cysteine inhibitor 1	0.0587	ADD69946		Cysteine proteinase inhibitor A	2e-83	Q10992		Non specific
P3C59-PPo	Transcription factor bhlh143	2.98e-05	XP_002522619		Unknown protein	2e-21			Non specific
P3C60-PPo	Cysteine inhibitor 1	0.0587	ADD69946		Cysteine proteinase inhibitor A	8e-84	Q10992		Non specific
P3C61-PPo									Non specific
P3C62-PPo	Ralf precursor	9.83e-07	NP_001066957		Unknown protein	2e-23			Non specific
P3C63-PPo	At5g08050 f13g24_250	3.13e-45	CBI15314		Unknown protein	6e-51			Non specific
P3C64-PPo	Phytochrome and flowering time regulatory protein 1	3.45e-77	AAF65166		Unknown protein	2e-40			Non specific
P3C65-PPo					Unknown protein	2e-05			Sustractive. Pistil specific
P3C66-PPo					Unknown protein	4e-56			Non specific
P3C67-PPo	Kcbp-interacting protein kinase	6.44e-14	XP_002277025		Protein kinase G11A	6e-45	Q0DCT8		Non specific
P3C68-PPo					Disease resistance response protein 206	7e-65	P13240		Sustractive. Pistil specific
P3C69-PPo	Chaperone protein dnaj	0.074	XP_002270197		SEC14 cytosolic factor/ CRAL-TRIO domain-containing protein YKL091C/ Retinal-binding protein	6e-11	Q75DK1/ P33324/ P49193		Non specific
P3C70-PPo	Cysteine inhibitor 1	0.536	ADD69946		Cysteine proteinase inhibitor A	6e-84	Q10992		Non specific
P3C71-PPo					Unknown protein	0.0003			Non specific
P3C72-PPo	Transcription factor ilr3	1.72e-53	CBI33226		Transcription factor MYC2	1e-26	Q39204		Non specific
P3C73-PPo	Acetone-cyanohydrin lyase	4.63e-14	XP_002880517		Polyneuridine-aldehyde esterase/ (S)-hydroxynitrile lyase/ Probable esterase PIR7A	1e-139	Q9SE93/ P52704/ Q0JG98		Non specific
P3C74-PPo	Transformation transcription domain-associated protein	4.92e-64	XP_002327756		Uncharacterized PI3/PI4-kinase family protein C1F5.11c/ Transcription-associated protein 1	7e-42	Q10064/ P38811		Non specific
P3C75-PPo	Elongation factor 1-alpha	2.26e-67	AEI28157		Elongation factor 1-alpha	9e-75	P43643		Non specific
P3C76-PPo	Udp-xylose phenolic glycosyltransferase	1.89e-42	NP_001234680		UDP-glycosyltransferase 74E1/ Indole-3-acetate beta-glucosyltransferase	1e-85	P0C7P7/ Q41819		Non specific
P3C77-PPo	Thaumatin-like protein	1.12e-97	BAA74546		Thaumatin-like protein/ Pathogenesis-related protein 5	3e-70	P50699/ P28493		Sustractive. Pistil specific
P3C78-PPo	Apocytochrome b	2.56e-43	XP_002529943		Cytochrome b	6e-49	P07747		Sustractive. Pistil specific
P3C79-PPo	Ribosomal protein s27	3.6e-23	XP_002512685		40S ribosomal protein S27-2	3e-34	Q9M2F1		Sustractive. Pistil specific
P3C80-PPo	Protein	4.27e-87	XP_002272165		CCR4-NOT transcription complex subunit 7	1e-49	Q3KQ85		Sustractive. Pistil specific
P3C81-PPo									Non specific
P3C82-PPo	14-3-3 protein	2.23e-62	AAY67798		14-3-3 protein 4	1e-101	P42652		Sustractive. Pistil specific
P3C83-PPo					Enolase	0.19	P56252		Non specific
P3C84-PPo	H aca ribonucleoprotein complex subunit 3-like protein	2.4e-30	ADB08692		H/ACA ribonucleoprotein complex subunit 3-like protein	5e-52	Q93XX8		Non specific
P3C85-PPo	14-3-3 protein	3.71e-61	BAD12183		14-3-3 protein 4	1e-88	P42652		Sustractive. Pistil specific
P3C86-PPo					Unknown protein	0.0006			Non specific
P3C87-PPo	Photosystem i reaction center subunit x psak	4.07e-56	CAK18849		Photosystem I reaction center subunit psaK, chloroplastic	1e-114	Q9SUI5		Non specific
P3C88-PPo	Non-yellowing protein 1	4.66e-40	XP_002284727		Unknown protein	1e-24			Non specific
P3C89-PPo									Non specific
P3C90-PPo	Protein	1.91e-124	NP_001242098		Putative DNA repair protein RAD23-3	5e-54	Q84L31		Non specific
P3C91-PPo									Non specific
P3C92-PPo									Sustractive. Pistil specific
P3C93-PPo									Non specific
P3C94-PPo	M030_arath ame: full=uncharacterized mitochondrial protein g00030 ame: full=orf107a	2.24e-44	YP_173374		Uncharacterized mitochondrial protein AtMg00030	3e-52	P93276		Non specific
P3C95-PPo					Unknown protein	0.0003			Sustractive. Pistil specific
P3C96-PPo	Glutathione s-transferase	2.57e-27	P46423		Glutathione S-transferase	7e-68	P46423		Non specific
