# Supplementary material for: Identification and Functional Annotation of Genes Differentially Expressed in the Reproductive Tissues of the Olive Tree (Olea europaea L.) through the Generation of Subtractive Libraries
Source: Front Plant Sci. 2017 Sep 13;8:1576. doi: 10.3389/fpls.2017.01576 (PMC5601413; doi:10.3389/fpls.2017.01576)
Supplement: Supplementary file 4 [file Table4.XLSX]

## Sheet: Sheet1
Sample	BLAST NCBI DATABASE	(eValue (<E-04)	Accesion number		BLAST OLEAEST DATABASE	(eValue (<E-04)	Id Uniprot		Screening Results
P1C1-PL	Translation factor sui1-like protein	1.64684e-59	XP_002280065		Protein translation factor SUI1 homolog	1e-118	Q9SM41		Non specific			Sequences without a significant similarity are boxed in orange
P1C2-PL					Early nodulin-like protein 2/ Mavicyanin/ Blue copper protein	2e-80	Q9T076/ P80728/ Q41001		Sustractive. Pistil specific
P1C3-PL	Protein	3.13617e-82	XP_002278808						Sustractive. Pistil specific
P1C4-PL	Pectate lyase	3.47424e-34	XP_003530685		Probable pectate lyase 18	1e-30	Q9C5M8		Non specific
P1C5-PL	Unknown [Populus trichocarpa]	0.0811921	ABK93930						Sustractive. Pistil specific
P1C6-PL					Unknown protein	0.038			Sustractive. Pistil specific
P1C7-PL	Subtilisin-like protease-like	2.74231e-63	CBI35805		Lipoxygenase homology domain-containing protein 1/ Polycystic kidney disease protein 1-like 3	9e-57	Q8IVV2/ Q2EG98		Sustractive. Pistil specific
P1C8-PL	Thaumatin-like protein	1.73137e-76	BAA74546		Pathogenesis-related protein 5/ Thaumatin-like protein 1a	1e-54	P28493/ Q9FSG7		Non specific
P1C9-PL	40s ribosomal protein s29	9.64649e-26	XP_002302413		40S ribosomal protein S29	2e-50	Q680P8		Non specific
P1C10-PL	Stem 28 kda glycoprotein	1.19062e-70	BAJ34931		Acid phosphatase 1/ Stem 28 kDa glycoprotein/ Stem 31 kDa glycoprotein	1e-115	P27061/ P15490/ P10742		Sustractive. Pistil specific
P1C11-PL	Cysteine inhibitor 1	0.0272699	ADD69946		Cysteine proteinase inhibitor A	2e-90	Q10992		Sustractive. Pistil specific
P1C12-PL	Potassium transporter 2	1.46839e-138	CAN75526		Potassium transporter 2	7e-57	O22881		Non specific
P1C13-PL					Unknown protein	0.025			Non specific
P1C14-PL	Chlorophyllase 2	5.59467e-45	XP_002273926		Chlorophyllase-2, chloroplastic	2e-48	Q9M7I7		Non specific
P1C15-PL	Thaumatin-like protein	6.55879e-84	CAN80000		Thaumatin-like protein/ Pathogenesis-related protein 5	1e-73	P50699/ P28493		Non specific
P1C16-PL	PREDICTED: uncharacterized protein LOC100255169 [Vitis vinifera]	1.72337	XP_002266224		Abscisic stress-ripening protein 1/ G-box-binding factor	0.18	Q08655/ P36417		Non specific
P1C17-PL					Glucan endo-1,3-beta-glucosidase 7	0.8	Q9M069		Sustractive. Pistil specific
P1C18-PL	Osmotin-like protein	7.6442e-10	AAK97184		Osmotin-like protein OSML13	8e-47	P50701		Non specific
P1C19-PL	Protein kinase family protein	4.83404e-47	XP_002312759		Serine/threonine-protein kinase PBS1/ Protein STRUBBELIG-RECEPTOR FAMILY 7	2e-45	Q9FE20/ Q9LUL4		Non specific
P1C20-PL					Unknown protein	0.057			Non specific
P1C21-PL	Fatty acid desaturase	2.03866e-45	AAQ08982		Omega-6 fatty acid desaturase, endoplasmic reticulum isozyme 2	1e-44	P48631		Sustractive. Pistil specific
P1C22-PL					SEC14 cytosolic factor/ CRAL-TRIO domain-containing protein YKL091C/ Retinal-binding protein	0.17	Q75DK1/ P33324/ P49193		Non specific
P1C23-PL	Zinc finger protein nutcracker-like	0.412171	CBI19670		Zinc finger protein JACKDAW	4e-09	Q700D2		Non specific
P1C24-PL	Eca1 gametogenesis related family protein	2.61382e-05	XP_002866005		Unknown protein	0.063			Non specific
P1C25-PL	Purple acid phosphatase	3.47238e-21	XP_002883248		Bifunctional purple acid phosphatase 26	1e-61	Q949Y3		Non specific
P1C26-PL	Calcium-dependent lipid-binding domain-containing protein	0.000103339	XP_002325345		Indole-3-glycerol phosphate synthase, chloroplastic	0.2	P49572		Non specific
P1C27-PL	Pollen ole e 1 allergen and extensin family protein	4.94798e-13	XP_002528264		Unknown protein	6e-63			Non specific
P1C28-PL	Chitinase-like protein 2	1.06834e-104	CBI39460		Basic endochitinase B	1e-117	P19171		Sustractive. Pistil specific
P1C29-PL	Thaumatin-like protein	6.99911e-68	BAA74546		Thaumatin-like protein/ Pathogenesis-related protein 5	2e-61	P50699/ P28493		Sustractive. Pistil specific
P1C30-PL					Glucan endo-1,3-beta-glucosidase 7	2e-05	Q9M069		Sustractive. Pistil specific
P1C31-PL	Glucose acyltransferase	5.86949e-07	XP_003633199		Serine carboxypeptidase-like 18	2e-54	Q9C7Z9		Non specific
P1C32-PL					Unknown protein	0.073			Sustractive. Pistil specific
P1C33-PL					Unknown protein	5e-05			Sustractive. Pistil specific
P1C34-PL					Pathogenesis-related protein 5/ Thaumatin-like protein 1	0.005	P28493/ Q9SMH2		Sustractive. Pistil specific
P1C35-PL					Probable aquaporin TIP1-2	0.002	Q94CS9		Non specific
P1C36-PL	Thaumatin-like protein	1.75018e-91	BAA74546		Thaumatin-like protein/ Pathogenesis-related protein 5	4e-72	P50699/ P28493		Non sustractive
P1C37-PL	Rapid alkalinization factor	1.13789e-07	XP_003637105		Unknown protein	2e-20			Non sustractive
P1C38-PL	Axial regulator yabby 5	0.713337	XP_002527201		Axial regulator YABBY 5	1e-39	Q8GW46		Non sustractive
P1C39-PL	Thaumatin-like protein	3.40696e-93	BAA74546		Thaumatin-like protein/ Pathogenesis-related protein 5	9e-72	P50699/ P28493		Non sustractive
P1C40-PL	Beta-amyrin synthase	2.66173e-57	ADK12003		Cycloartenol synthase/ Lanosterol synthase	1e-103	P38605/ P48449		Non specific
P1C41-PL									Non specific
P1C42-PL	Pectin methylesterase	1.91214e-120	AFQ23194		Pectinesterase/pectinesterase inhibitor U1	1e-91	Q43143		Non specific
P1C43-PL					Protein TAR1	0.23	Q6CQE5		Non specific
P1C44-PL					Phospho-N-acetylmuramoyl-pentapeptide-transferase homolog	0.66	O49730		Non specific
P1C45-PL	ATP synthase delta	9.56655e-91	Q40089		ATP synthase subunit delta', mitochondrial	2e-78	Q40089		Sustractive. Pistil specific
P1C46-PL									Sustractive. Pistil specific
P1C47-PL					Enolase	0.36	Q43321		Non specific
P1C48-PL	Pre-mRNA processing protein expressed	5.43463e-39	XP_002523580		Pathogenesis-related protein 5/ Thaumatin-like protein 1a	8e-07	P28493/ Q9FSG7		Non specific
P1C49-PL					Unknown protein	9e-16			Sustractive. Pistil specific
P1C50-PL	Af202179_1disease resistance protein bs2	50.9339	AAF09256		Putative late blight resistance protein homolog R1A-3	4e-13	Q6L440		Sustractive. Pistil specific
P1C51-PL	Ef hand family protein	9.34336e-89	AAT40490		Probable calcium-binding protein CML13	1e-120	Q94AZ4		Sustractive. Pistil specific
P1C52-PL	Beta-amyrin synthase	1.12786e-97	CBI18407		Cycloartenol synthase/ Lanosterol synthase	3e-55	P38605/ Q96WJ0		Non specific
P1C53-PL	Cysteine protease inhibitor	0.14075	ABK20185		Cysteine proteinase inhibitor A	4e-82	Q10992		Non specific
P1C54-PL	Photosystem ii core complex proteins chloroplastic-like	6.269e-20	XP_002285325		Photosystem II core complex proteins psbY, chloroplastic	1e-49	P80470		Non specific
P1C55-PL					Pathogenesis-related protein 5/ Thaumatin-like protein 1a	0.04	P28493/ Q9FSG7		Non specific
P1C56-PL					Unknown protein	0.0004			Non specific
P1C57-PL	Cysteine protease inhibitor	2.37008	ABK20185		Cysteine proteinase inhibitor A	2e-82	Q10992		Non specific
P1C58-PL	Beta-tubulin	2.53475e-94	NP_001141544		Tubulin beta-6 chain	9e-97	Q76FS3		Non specific
P1C59-PL	Thaumatin-like protein	1.04448e-90	BAA74546		Thaumatin-like protein/ Pathogenesis-related protein 5	2e-70	P50699/ P28493		Non specific
P1C60-PL	Cysteine inhibitor 1	0.0374137	ADD69946		Cysteine proteinase inhibitor A	9e-83	Q10992		Non specific
P1C61-PL	Thaumatin-like protein	7.59661e-48	BAA74546		Thaumatin-like protein/ Pathogenesis-related protein 5	3e-45	P50699/ P28493		Sustractive. Pistil specific
P1C62-PL	Duf246 domain-containing protein at1g04910-like	5.17657e-05	XP_002530648		Gibberellin-regulated protein 3	0.035	P46687		Sustractive. Pistil specific
P1C63-PL	Thaumatin-like protein	1.31983e-65	CAN80000		Thaumatin-like protein/ Pathogenesis-related protein 5	3e-64	P50699/ P28493		Sustractive. Pistil specific
P1C64-PL									Non specific
P1C65-PL					Coatomer subunit beta-2	0.013	Q9SV20		Sustractive. Pistil specific
P1C66-PL									Sustractive. Pistil specific
P1C67-PL	Gonadotropin beta chain	7.84237e-40	XP_002520219		Gibberellin-regulated protein 3	5e-89	P46687		Sustractive. Pistil specific
P1C68-PL					Unknown protein	4e-28			Sustractive. Pistil specific
P1C69-PL									Sustractive. Pistil specific
P1C70-PL	STS14 protein	3.80003e-65	Q41495		STS14 protein/ Pathogenesis-related protein 1C	2e-25	Q41495/ P09042		Non specific
P1C71-PL	Thaumatin-like protein	7.66888e-73	CAN80000		Thaumatin-like protein/ Pathogenesis-related protein 5	4e-66	P50699/ P28493		Non specific
P1C72-PL					Unknown protein	0.0005			Non specific
P1C73-PL					Unknown protein	0.023			Non specific
P1C74-PL					Unknown protein	0.0001			Sustractive. Pistil specific
P1C75-PL	Protein tify 9	3.50441e-06	XP_002304653		Unknown protein	2e-10			Non specific
P1C76-PL									Non specific
P1C77-PL	Cyclase family protein	4.57498e-33	XP_002867131		Unknown protein	5e-22			Sustractive. Pistil specific
P1C78-PL	Elicitor-inducible protein eig-j7	6.03203e-45	NP_001234532		Animal Lipoxygenase homology domain-containing protein 1/ Animal Polycystic kidney disease protein 1-like 3	3e-57	Q8IVV2/ Q2EG98		Sustractive. Pistil specific
P1C79-PL	Thaumatin-like protein	3.58665e-89	BAA74546		Thaumatin-like protein/ Pathogenesis-related protein 5	2e-71	P50699/ P28493		Non specific
P1C80-PL	Low quality protein: pathogenesis-related protein 5-like	8.46588e-11	XP_003633935		Thaumatin-like protein/ Pathogenesis-related protein 5	5e-21	P50699/ P28493		Non specific
P1C81-PL					36.4 kDa proline-rich protein/ 14 kDa proline-rich protein DC2.15/ Cortical cell-delineating protein	7e-76	Q00451/ P14009/ Q01595		Sustractive. Pistil specific
P1C82-PL	Aspartyl protease family protein	7.83357e-28	CAN65806		Aspartic proteinase nepenthesin-2/ Chymosin	1e-10	Q766C2/ P18276		Sustractive. Pistil specific
P1C83-PL	Ribosomal protein l1	1.54254e-42	AAG17879		60S ribosomal protein L10a-3	2e-45	P59231		Sustractive. Pistil specific
P1C84-PL	Glutathione s-transferase	6.00824e-14	AEX37999		Glutathione S-transferase F10	5e-16	P42761		Sustractive. Pistil specific
P1C85-PL					Deacetoxyvindoline 4-hydroxylase/ 1-aminocyclopropane-1-carboxylate oxidase homolog 1	0.024	O04847/ Q84MB3		Sustractive. Pistil specific
P1C86-PL									Sustractive. Pistil specific
P1C87-PL	Aspartic proteinase nepenthesin-1	6.02561e-73	ABK92955		Aspartic proteinase nepenthesin-1	1e-107	Q766C3		Non specific
P1C88-PL	Lipid transfer protein	2.72477e-20	XP_002279379		Probable non-specific lipid-transfer protein AKCS9	2e-83	Q43681		Non specific
P1C89-PL	17-1 like protein	7.8573e-72	XP_002533683		DUF246 domain-containing protein At1g04910	2e-94	Q8W486		Non specific
P1C90-PL	Avr9 elicitor response protein	2.72469e-36	AFK45069		Beta-1,3-galactosyltransferase sqv-2	4e-22	Q9N491		Non specific
P1C91-PL	Lipid transfer protein	4.72535e-21	XP_002279379		Probable non-specific lipid-transfer protein AKCS9	9e-83	Q43681		Non specific
P1C92-PL	2pgk 2-phosphoglycerate kinase	1.3862e-32	XP_002534208		Chaperone protein DnaJ/ Mitochondrial protein import protein mas5	0.027	Q73IV4/ O74752		Non specific
P1C93-PL	Pinus taeda anonymous locus cl4080contig1_02 genomic sequence	1.42691e-24	CAN80000		Pathogenesis-related protein 5/ Thaumatin-like protein 1a	4e-38	P28493/ Q9FSG7		Non specific
P1C94-PL					Putative late blight resistance protein homolog R1A-3	6e-13	Q6L440		Non specific
P1C95-PL									Sustractive. Pistil specific
P1C96-PL	Late embryogenesis	1.71598e-12	CBI17507						Non specific
P2C1-PL					Phosphoethanolamine N-methyltransferase 1	5e-09	Q9FR44		Non specific
P2C2-PL	Glutathione s-transferase omega	2.65349e-73	ADB85103		Protein IN2-1	4e-61	P49248		Non specific
P2C3-PL					Chaperone protein DnaJ	1e-08	Q97BG9		Non specific
P2C4-PL	DNA binding	9.88488e-20	XP_002318005		Transcription factor BEE 2	6e-39	Q93VJ4		Non specific
P2C5-PL	Pectate lyase	4.96308e-71	XP_002311599		Probable pectate lyase 12	7e-47	Q9SCP2		Sustractive. Pistil specific
P2C6-PL	Histone h3	5.66984e-16	AAN46701		Histone H3.3	2e-24	Q71H73		Sustractive. Pistil specific
P2C7-PL					Unknown protein	0.093			Non specific
P2C8-PL	Myosin-like protein	1.37993e-16	CBI27520		Coatomer subunit beta-2	0.002	Q9SV20		Non specific
P2C9-PL	Beta-glucosidase g1	2.40123e-10	AAL93619		Beta-glucosidase, chloroplastic	2e-23	P49235		Non specific
P2C10-PL					Serine/threonine-protein kinase CTR1/ Dual specificity protein kinase splA	0.24	Q05609/ P18160		Sustractive. Pistil specific
P2C11-PL	Thaumatin-like protein	7.24988e-87	BAA74546		Thaumatin-like protein/ Pathogenesis-related protein 5	8e-63	P50699/ P28493		Non specific
P2C12-PL	cysteine protease inhibitor	0.133366	Q10992		Cysteine proteinase inhibitor A	1e-72	Q10992		Non specific
P2C13-PL					Unknown protein	0.003			Non specific
P2C14-PL	Protein	4.42716e-76	XP_003535238		Unknown protein	2e-59			Non specific
P2C15-PL	Ralf precursor	1.48589e-06	NP_001066957		Unknown protein	1e-16			Non specific
P2C16-PL					Endoplasmin homolog	1e-73	P35016		Non specific
P2C17-PL					Unknown protein	0.0005			Sustractive. Pistil specific
P2C18-PL	Gdp-mannose 3 -epimerase	6.01898e-132	XP_002467242		GDP-mannose 3,5-epimerase 2	1e-103	Q2R1V8		Non specific
P2C19-PL	3 -5 exonuclease and kh-i domain-containing protein	5.03683e-102	XP_002516481		Exonuclease 3'-5' domain-containing protein 1	1e-50	Q8CDF7		Non specific
P2C20-PL	Protein	1.173e-44	T02428		Polyneuridine-aldehyde esterase/ (S)-hydroxynitrile lyase/ Probable esterase PIR7A	3e-88	Q9SE93/ P52704/ Q0JG98		Non specific
P2C21-PL					Plasma membrane ATPase 1	0.64	Q08435		Non specific
P2C22-PL					Unknown protein	0.067			Non specific
P2C23-PL	Probable adenylate kinase chloroplastic	0.000191547	XP_002263142		Probable adenylate kinase 1, chloroplastic	8e-33	Q9ZUU1		Sustractive. Pistil specific
P2C24-PL	Probable receptor-like serine threonine-protein kinase at5g57670-like	6.64181e-108	XP_002269944		Receptor-like protein kinase/ Putative cysteine-rich receptor-like protein kinase 33	5,00E-48	P93194/ Q9LDN1		Sustractive. Pistil specific
P2C25-PL	Invertase inhibitor	5.00548e-38	ABI17896		21 kDa protein/ Pectinesterase/pectinesterase inhibitor U1	0.029	P17407/ Q43143		Sustractive. Pistil specific
P2C26-PL					Unknown protein	4e-09			Non specific
P2C27-PL					Unknown protein	0.019			Non specific
P2C28-PL	Protein	2.43924e-48	BAB32735		Ubiquitin	4e-56	P69326		Non specific
P2C29-PL					MTA/SAH nucleosidase	1e-05	P67656		Non specific
P2C30-PL					Unknown protein	0.052			Non specific
P2C31-PL	Histone h3	3.82298e-85	CAN70652		Histone H3.3	1e-134	Q71H73		Non specific
P2C32-PL					Protein TAR1	0.047	Q6CQE5		Non specific
P2C33-PL	60s ribosomal protein	4.72911e-77	ABA46763		60S ribosomal protein L28-2	7e-88	Q9M0E2		Sustractive. Pistil specific
P2C34-PL	Two-component response regulator arr12-like	1.91412e-42	ABG35773		Two-component response regulator ARR12	3e-52	P62598		Non specific
P2C35-PL					Unknown protein	0.0001			Non specific
P2C36-PL	Hydroxycinnamoyl-coenzyme a shikimate quinate hydroxycinnamoyltransferase-like	3.59616e-20	XP_003551937		Anthranilate N-benzoyltransferase protein 3	6e-20	O23918		Non specific
P2C37-PL	Protein	3.99976e-54	ACU20037		Animal Oral cancer-overexpressed protein 1 homolog	6e-54	Q8CH62		Sustractive. Pistil specific
P2C38-PL	Cysteine inhibitor 1	0.0380053	ADD69946		Cysteine proteinase inhibitor A	8e-86	Q10992		Non specific
P2C39-PL	Thaumatin-like protein	3.45179e-92	BAA74546		Thaumatin-like protein/ Pathogenesis-related protein 5	4e-72	P50699/ P28493		Non specific
P2C40-PL									Non specific
P2C41-PL	Pathogenesis-related thaumatin-like protein	5.1124e-44	AFP49333		Pathogenesis-related protein R major form/ Osmotin-like protein OSM34		P13046/ P50700		Non specific
P2C42-PL	Cysteine inhibitor 1	0.0026094	ADD69946		Cysteine proteinase inhibitor A	4e-87	Q10992		Non specific
P2C43-PL	30s ribosomal protein s2	3.61912e-24	YP_173420		Pectinesterase/pectinesterase inhibitor U1	0.007	Q43143		Non specific
P2C44-PL	Probable pectinesterase pectinesterase inhibitor 21-like	1.57326e-95	XP_002275819		Pectinesterase/pectinesterase inhibitor U1	4e-44	Q43143		Non specific
P2C45-PL	Aquaporin pip1 1	1.56217e-18	AES04079		Probable aquaporin PIP1-4	8,00E-29	Q39196		Non specific
P2C46-PL					Unknown protein	0.006			Non specific
P2C47-PL					Protein TAR1	0.016	Q6CQE5		Non specific
P2C48-PL					60S ribosomal protein L23	9e-08	P49690		Non specific
P2C49-PL	Thaumatin-like protein	6.64234e-90	BAA74546		Thaumatin-like protein/ Pathogenesis-related protein 5	3e-71	P50699/ P28493		Sustractive. Pistil specific
P2C50-PL	Thaumatin-like protein	3.01532e-65	BAA74546		Thaumatin-like protein/ Pathogenesis-related protein 5	7e-66	P50699/ P28493		Sustractive. Pistil specific
P2C51-PL	ATP binding	9.3649e-83	XP_002518240		U-box domain-containing protein 34	1e-44	Q8S8S7		Non specific
P2C52-PL	U-box domain-containing protein 19-like	9.50642e-68	XP_002264637		U-box domain-containing protein 18	4e-37	Q9XIJ5		Non specific
P2C53-PL	Thaumatin-like protein	1.14978e-87	BAA74546		Thaumatin-like protein/ Pathogenesis-related protein 5	2e-62	P50699/ P28493		Non specific
P2C54-PL	Ests gb	1.37052e-116	XP_003517865		Unknown protein	8e-68			Sustractive. Pistil specific
P2C55-PL					Cysteine proteinase inhibitor A	4e-70	Q10992		Non specific
P2C56-PL	Arabinogalactan peptide 20	5.67299e-13	XP_002265607		Arabinogalactan peptide 20	5e-56	Q9M373		Non specific
P2C57-PL	Anthranilate synthase alpha	3.9583e-61	AAU84989		Anthranilate synthase component I-1, chloroplastic	9e-23	P32068		Sustractive. Pistil specific
P2C58-PL	Lipid transfer protein	2.4469e-21	XP_002279379		Probable non-specific lipid-transfer protein AKCS9	2e-83	Q43681		Non specific
P2C59-PL					Unknown protein	0.0001			Non specific
P2C60-PL					Unknown protein	5,00E-04			Non specific
P2C61-PL					Unknown protein	1e-38			Non specific
P2C62-PL	Leucine-rich repeat receptor-like protein	5.42218e-42	XP_002285553		DNA-damage-repair/toleration protein DRT100/ LRR receptor-like serine/threonine-protein kinase FLS2/ Polygalacturonase inhibitor 1	5e-94	Q00874/ Q9FL28/ Q9M5J9		Non specific
P2C63-PL					Unknown protein	6e-09			Non specific
P2C64-PL	Cysteine proteinase inhibitor	0.318811	ABK20185		Cysteine proteinase inhibitor A	3e-85	Q10992		Non specific
P2C65-PL	Thaumatin-like protein	1.78679e-95	BAA74546		Thaumatin-like protein/ Pathogenesis-related protein 5	2e-71	P50699/ P28493		Sustractive. Pistil specific
P2C66-PL	Cysteine inhibitor 1	0.0037557	ADD69946		Cysteine proteinase inhibitor A	4e-87	Q10992		Non specific
P2C67-PL	Thaumatin-like protein	3.24616e-91	BAA74546		Thaumatin-like protein/ Pathogenesis-related protein 5	2e-71	P50699/ P28493		Non specific
P2C68-PL	Protein	6.45306e-48	XP_002306628		Unknown protein	6e-68			Non specific
P2C69-PL	Thaumatin-like protein	3.11186e-80	BAA74546		Thaumatin-like protein/ Pathogenesis-related protein 5	6e-69	P50699/ P28493		Non specific
P2C70-PL					Unknown protein	0.022			Non specific
P2C71-PL	Chaperonin 21 precursor	2.09841e-52	XP_002276749		20 kDa chaperonin, chloroplastic	8e-38	O65282		Sustractive. Pistil specific
P2C72-PL					Histone-lysine N-methyltransferase trithorax	0.92	P20659		Non specific
P2C73-PL	Translational initiation factor 1	6.32832e-31	ADD72123		30S ribosomal protein S11, chloroplastic	1e-142	Q68RX4		Sustractive. Pistil specific
P2C74-PL	Glyceraldehyde-3-phosphate dehydrogenase a	1.69238e-114	CCF55355		Glyceraldehyde-3-phosphate dehydrogenase A, chloroplastic	8e-77	P09043		Non specific
P2C75-PL	1-aminocyclopropane-1-carboxylate oxidase-like protein	1.85398e-43	XP_002284638		1-aminocyclopropane-1-carboxylate oxidase homolog/ Deacetoxyvindoline 4-hydroxylase	5e-57	P10967/ O04847		Non specific
P2C76-PL	Fatty acid desaturase	2.44921e-45	AAQ08982		Omega-6 fatty acid desaturase, endoplasmic reticulum isozyme 2	1e-44	P48631		Non specific
P2C77-PL	Transcription factor iia small subunit	1.74796e-05	XP_003544835		Transcription initiation factor IIA subunit 2	5e-36	Q39236		Non specific
P2C78-PL					60S ribosomal protein L5	0.006	P93779		Non specific
P2C79-PL					Unknown protein	1e-35			Non specific
P2C80-PL	Cysteine protease inhibitor	1.40213	ABK20185		Cysteine proteinase inhibitor A	1e-82	Q10992		Non specific
P2C81-PL	Thaumatin-like protein	7.10671e-90	BAA74546		Thaumatin-like protein/ Pathogenesis-related protein 5	2e-78	P50699/ P28493		Non specific
P2C82-PL	Cysteine protease inhibitor	1.32555	ABK20185		Cysteine proteinase inhibitor A	6e-87	Q10992		Non specific
P2C83-PL	M030_arath ame: full=uncharacterized mitochondrial protein g00030 ame: full=orf107a	9.32784e-45	YP_173374		Uncharacterized mitochondrial protein AtMg00030	8e-59	P93276		Non specific
P2C84-PL	Lipid transfer protein	2.05656e-19	XP_002279379		Probable non-specific lipid-transfer protein AKCS9	4e-82	Q43681		Non specific
P2C85-PL	High affinity inorganic phosphate transporter	6.56786e-49	ADY17644		Inorganic phosphate transporter 1-4	7e-40	Q96303		Non specific
P2C86-PL	Thaumatin-like protein	1.06011e-92	BAA74546		Thaumatin-like protein/ Pathogenesis-related protein 5	2e-71	P50699/ P28493		Non specific
P2C87-PL	Myrosinase	0.626403	BAB17227		Beta-glucosidase, chloroplastic	8e-08	P49235		Non specific
P2C88-PL	Cysteine inhibitor 1	0.0407852	ADD69946		Cysteine proteinase inhibitor A	4e-85	Q10992		Non specific
P2C89-PL	Thaumatin-like protein	2.65417e-96	BAA74546		Thaumatin-like protein/ Pathogenesis-related protein 5	2,00 E-71	P50699/ P28493		Non specific
P2C90-PL	Protein	4.51424e-33	XP_002307245		Polyneuridine-aldehyde esterase/ (S)-hydroxynitrile lyase/ Probable esterase PIR7A	2e-68	Q9SE93/ P52704/ Q0JG98		Non specific
P2C91-PL					Unknown protein	0.002			Non specific
P2C92-PL	Cysteine inhibitor 1	0.0374137	ADD69946		Cysteine proteinase inhibitor A	5e-86	Q10992		Non specific
P2C93-PL	40s ribosomal protein s25-2	2.94443e-35	ADE42971		40S ribosomal protein S25-2	3e-70	Q9SIK2		Non specific
P2C94-PL	Protein kinase	1.27276e-69	AAF66637		Protein kinase PVPK-1/ Protein kinase G11A	2e-57	P15792/ Q0DCT8		Non specific
P2C95-PL	Thaumatin-like protein	1.00039e-86	BAA74546		Thaumatin-like protein/ Pathogenesis-related protein 5	5e-63	P50699/ P28493		Non specific
P2C96-PL	Heavy metal transport detoxification domain-containing protein	4.84052e-19	ACJ85845		Unknown protein	4e-12			Non specific
