# Supplementary material for: Identification and Functional Annotation of Genes Differentially Expressed in the Reproductive Tissues of the Olive Tree (Olea europaea L.) through the Generation of Subtractive Libraries
Source: Front Plant Sci. 2017 Sep 13;8:1576. doi: 10.3389/fpls.2017.01576 (PMC5601413; doi:10.3389/fpls.2017.01576)
Supplement: Supplementary file 5 [file Table5.XLSX]

## Sheet: Sheet 1
Sample	BLAST NCBI DATABASE	(eValue (<E-04)	Accesion number		BLAST OLEAEST DATABASE	(eValue (<E-04)	Id Uniprot		Screening Results
P1C1-LP	Metallothionein-like protein	3.21677e-18	AFK33631		Metallothionein-like protein type 3	1e-71	Q96386		Non specific			Sequences without a significant similarity are boxed in orange
P1C2-LP	At4g28740 f16a16_150	2.46172e-21	XP_002320616		29 kDa ribonucleoprotein A, chloroplastic	0.087	Q08935		Non specific
P1C3-LP	Bax inhibitor 1	5.54834e-53	NP_001234450		Bax inhibitor 1	1e-50	Q9LD45		Non specific
P1C4-LP					Protein TAR1	0.007	Q6CQE5		Non specific
P1C5-LP	Light harvesting chlorophyll a b-binding protein	4.47958e-33	BAA25389		Chlorophyll a-b binding protein 21, chloroplastic	3,00E-54	P27493		Non specific
P1C6-LP	ATPa	1.02677e-26	ACM46791		ATP synthase subunit alpha, mitochondrial	4e-42	P92549		Non specific
P1C7-LP	Photosystem ii 32 kda protein	1.59849e-93	ABR87701		Photosystem Q(B) protein	1e-117	Q0ZJ40		Non specific
P1C8-LP									Non specific
P1C9-LP	Ribulose bisphosphate small subunit	9.9E-26	CCJ09777		Ribulose bisphosphate carboxylase small chain, chloroplastic	7e-35	Q40004		Non specific
P1C10-LP					Ethylene-responsive transcription factor ERF061	0.043	Q9C7W2		Non specific
P1C11-LP	Transitional endoplasmic reticulum	3.58989e-24	AAP03644		Cell division cycle protein 48 homolog	4e-38	P54774		Non specific
P1C12-LP	Chlorophyll a b binding protein	9.37511e-98	CAA84525		Chlorophyll a-b binding protein, chloroplastic	1e-103	P12332		Non specific
P1C13-LP					Unknown protein	2e-12			Sustractive. Leaf specific
P1C14-LP					Unknown protein	7e-53			Sustractive. Leaf specific
P1C15-LP	Light harvesting chlorophyll a b-binding protein	2.40519e-15	BAA25388		Chlorophyll a-b binding protein 21, chloroplastic	5e-47	P27493		Non specific
P1C16-LP	High mobility group b2 protein	2.46117e-25	XP_002272299		HMG1/2-like protein	7e-98	P40619		Sustractive. Leaf specific
P1C17-LP	Light harvesting chlorophyll a b-binding protein	1.11846e-19	CCJ09777		Chlorophyll a-b binding protein 21, chloroplastic	4e-45	P27493		Non specific
P1C18-LP	Plastocyanin chloroplast	1.08739e-42	P17340		Plastocyanin, chloroplastic	1e-120	P17340		Non specific
P1C19-LP	Glutamine synthetase	1.86042e-107	AAK08103		Glutamine synthetase	1e-134	P23712		Non specific
P1C20-LP	Thiazole biosynthetic enzyme	1.08748e-75	CAN74175		Thiamine thiazole synthase, chloroplastic	9e-78	O23787		Non specific
P1C21-LP					Unknown protein	0.0004			Non specific
P1C22-LP	Chlorophyll a b binding protein	2.83038e-106	XP_002531690		Chlorophyll a-b binding protein, chloroplastic	1e-128	P12332		Non specific
P1C23-LP	Senescence-associated protein	6.63082e-50	ACA30301		Unknown protein	1e-61			Non specific
P1C24-LP					Unknown protein	0.002			Non specific
P1C25-LP	Thiazole biosynthetic enzyme	1.18932e-111	CCJ09780		Thiamine thiazole synthase, chloroplastic	1e-141	O23787		Non specific
P1C26-LP	Cysteine proteinase rd21a	5.07951e-14	BAD29960		Low-temperature-induced cysteine proteinase/ Oryzain alpha chain		P20721/ P25776		Non specific
P1C27-LP	Lipid transfer protein precursor	3.79207e-33	CCJ09772		Non-specific lipid-transfer protein	1e-103	P10976		Non specific
P1C28-LP	Zinc-binding protein	1.21706e-27	CBI26476		Unknown protein	4e-41			Non specific
P1C29-LP	Polyubiquitin	1.11007e-111	EEC81189		Ubiquitin	1e-80	P69326		Non specific
P1C30-LP	Lipid transfer protein precursor	2.10482e-32	CCJ09772		Non-specific lipid-transfer protein	1,00E-101	P10976		Non specific
P1C31-LP	Glutamine synthetase	2.8174e-87	AAK08103		Glutamine synthetase	1e-119	P23712		Sustractive. Leaf specific
P1C32-LP	Acetyl- carboxylase carboxyltransferase beta subunit	7.84398e-56	ACB58687		Acetyl-coenzyme A carboxylase carboxyl transferase subunit beta, chloroplastic	2e-62	P12219		Sustractive. Leaf specific
P1C33-LP	Photosystem ii 32 kda partial	0.00244628	ACN39160		Photosystem Q(B) protein	4e-13	Q0ZJ40		Non specific
P1C34-LP	DNA damage-binding protein 1a	6.1922e-72	CBI30975		DNA damage-binding protein 1	7e-11	Q6QNU4		Non specific
P1C35-LP	Fructose bisphosphate aldolase	1.48456e-40	NP_001031386		Fructose-bisphosphate aldolase, chloroplastic	5e-55	Q40677		Non specific
P1C36-LP	Glutamine synthetase	1.45583e-91	AAK08103		Glutamine synthetase	1e-123	P23712		Non specific
P1C37-LP	Ribulose bisphosphate carboxylase oxygenase chloroplast expressed	3.92277e-66	ABK96359		Ribulose bisphosphate carboxylase/oxygenase activase, chloroplastic	3e-63	P93431		Non specific
P1C38-LP	Light harvesting chlorophyll a b-binding protein	3.9122e-90	CAA52749		Chlorophyll a-b binding protein 21, chloroplastic	7e-95	P27493		Non specific
P1C39-LP	Chloroplast light harvesting chlorophyll a b binding partial	0.00254853	BAB41190		Chlorophyll a-b binding protein 21, chloroplastic	6e-12	P27493		Non specific
P1C40-LP					Integumentary mucin A.1/ Cell wall protein DAN4	4e-20	P10667/ P47179		Non specific
P1C41-LP	Glutamine synthetase	7.1843e-110	AAK08103		Glutamine synthetase	1e-142	P23712		Non specific
P1C42-LP	Glutamine synthetase	3.4229e-66	ACF74298		Glutamine synthetase	2e-75	P23712		Non specific
P1C43-LP					Unknown protein	0.0001			Non specific
P1C44-LP					Unknown protein	0.003			Non specific
P1C45-LP	Chlorophyll a b binding protein	9.62239e-135	XP_002531690		Chlorophyll a-b binding protein, chloroplastic	1e-147	P12332		Non specific
P1C46-LP	Galactinol synthase 1	1.90498e-50	ACA04029		Meiotically up-regulated gene 136 protein/ Glycogenin-2/ Uncharacterized protein C5H10.12c	1e-41	O43061/ O15488/ Q09680		Non specific
P1C47-LP	40s ribosomal protein s5	3.63502e-94	AAR89617		40S ribosomal protein S5-2	1e-120	P51427		Non specific
P1C48-LP	Protein disulfide	5.24096e-102	XP_002515309		Protein disulfide-isomerase like 2-1	5e-69	O22263		Non specific
P1C49-LP	Light harvesting chlorophyll a b-binding protein	1.32873e-62	CAA52749		Chlorophyll a-b binding protein 21, chloroplastic	4e-74	P27493		Non specific
P1C50-LP	Cytochrome b6 f complex subunit iv	2.03842e-15	CAA32269		Cytochrome b6-f complex subunit 4	5e-24	Q2MI70		Non specific
P1C51-LP	Rwp-rk domain-containing protein	3.03592e-34	XP_002518861		Integumentary mucin A.1/ Cell wall protein DAN4	1e-28	P10667/ P47179		Non specific
P1C52-LP					Unknown protein	4e-52			Non specific
P1C53-LP	Ma3 domain-containing protein	6.62023e-92	AEA86341		Animal Programmed cell death protein 4	1e-28	Q9JID1		Non specific
P1C54-LP	Glutamine synthetase	3.4229e-66	ACF74298		Glutamine synthetase	2e-75	P23712		Non specific
P1C55-LP	Plastidic aldolase	1.24935e-126	ADD52195		Fructose-bisphosphate aldolase, chloroplastic	1e-137	Q40677		Non specific
P1C56-LP	Ribulose bisphosphate small subunit	2.43733e-19	CCJ09777		Ribulose bisphosphate carboxylase small chain, chloroplastic	4e-35	Q40004		Non specific
P1C57-LP					Unknown protein	1e-06			Non specific
P1C58-LP	Plastidic aldolase	3.52864e-49	AAV74407		Fructose-bisphosphate aldolase, chloroplastic	1e-85	Q40677		Non specific
P1C59-LP					Unknown protein	0.003			Non specific
P1C60-LP	Photosystem ii 47 kda protein	5.78049e-80	ABG74756		Photosystem II CP47 chlorophyll apoprotein	1e-107	P06411		Non specific
P1C61-LP	Ribulose bisphosphate small subunit	8.77426e-19	CCJ09777		Ribulose bisphosphate carboxylase small chain, chloroplastic	6e-34	Q40004		Non specific
P1C62-LP	Chloroplast ribulose- -bisphosphate carboxylase oxygenase small subunit	3.56984e-10	ABS71998		Ribulose bisphosphate carboxylase small chain, chloroplastic	1e-20	Q40004		Non specific
P1C63-LP	Chlorophyll a b binding protein	1.78852e-138	XP_002531690		Chlorophyll a-b binding protein, chloroplastic	1e-152	P12332		Non specific
P1C64-LP	Light harvesting chlorophyll a b-binding protein	2.11624e-135	XP_002455902		Chlorophyll a-b binding protein 21, chloroplastic	1e-145	P27493		Sustractive. Leaf specific
P1C65-LP	Metallothionein-like protein	3.04779e-18	AFK33631		Metallothionein-like protein type 3	5e-74	Q96386		Non specific
P1C66-LP	Rieske domain containing expressed	4.64392e-79	XP_002528040		Photosystem II 22 kDa protein, chloroplastic	1e-07	Q02060		Non specific
P1C67-LP	Transcription factor asg4-like	1.29901e-25	XP_002320823		Myb-like protein G	5e-89	Q54IF9		Non specific
P1C68-LP	Metallothionein-like protein	3.01533e-18	AFK33631		Metallothionein-like protein type 3	3e-72	Q96386		Non specific
P1C69-LP	Plastidic aldolase	6.66183e-125	ADD52195		Fructose-bisphosphate aldolase, chloroplastic	1e-137	Q40677		Non specific
P1C70-LP					1-aminocyclopropane-1-carboxylate oxidase	4e-10	P31237		Non specific
P1C71-LP					Unknown protein	0.041			Non specific
P1C72-LP					Unknown protein	0.21			Non specific
P1C73-LP	Light harvesting chlorophyll a b-binding protein	4.85234e-127	ACF85694		Chlorophyll a-b binding protein 21, chloroplastic	1e-138	P27493		Sustractive. Leaf specific
P1C74-LP	Farnesylated protein	7.64198e-54	XP_002278879		Unknown protein	1e-109			Non specific
P1C75-LP	Light harvesting chlorophyll a b-binding protein	9.63854e-16	BAA25388		Chlorophyll a-b binding protein 21, chloroplastic	5e-47	P27493		Non specific
P1C76-LP	Light harvesting chlorophyll a b-binding protein	5.32708e-145	XP_002519724		Chlorophyll a-b binding protein 21, chloroplastic	1e-155	P27493		Non specific
P1C77-LP	Chlorophyll a b binding protein	2.12096e-143	XP_002531690		Chlorophyll a-b binding protein, chloroplastic	1e-155	P12332		Sustractive. Leaf specific
P1C78-LP	Light harvesting chlorophyll a b-binding protein	6.09044e-15	BAA25388		Chlorophyll a-b binding protein 21, chloroplastic	1e-45	P27493		Non specific
P1C79-LP	Photosystem ii 10 kda polypeptide	2.55618e-58	XP_002271791		Photosystem II 10 kDa polypeptide, chloroplastic	1e-128	Q40519		Non specific
P1C80-LP					Unknown protein	0.0002			Non specific
P1C81-LP	Chlorophyll a-b binding protein 2	3.20342e-128	XP_002455902		Chlorophyll a-b binding protein 21, chloroplastic	1e-136	P27493		Non specific
P1C82-LP	Metallothionein-like protein	1.51925e-18	XP_002284956		Metallothionein-like protein type 3	3e-67	Q96386		Non specific
P1C83-LP	Fusca protein fus6	1.5316e-43	XP_002511799		COP9 signalosome complex subunit 1	2e-28	P45432		Non specific
P1C84-LP					Unknown protein	0.004			Non specific
P1C85-LP	Light harvesting chlorophyll a b-binding protein	1.6347e-121	BAA25391		Chlorophyll a-b binding protein 21, chloroplastic	1e-144	P27493		Non specific
P1C86-LP	Zinc finger protein	1.85906e-10	CAN83345		Unknown protein	3e-14			Non specific
P1C87-LP	Plastidic aldolase	4.083e-51	AAV74407		Fructose-bisphosphate aldolase, chloroplastic	4e-80	Q40677		Non specific
P1C88-LP	Ribosomal protein s15 family protein	8.68957e-72	XP_002264817		Syntaxin-61	0.25	Q946Y7		Non specific
P1C89-LP	Fructose bisphosphate aldolase	8.9088e-41	NP_001031386		Fructose-bisphosphate aldolase, chloroplastic	9e-54	Q40677		Non specific
P1C90-LP	Glutamine synthetase	6.4988e-65	ACF74298		Glutamine synthetase	2e-75	P23712		Non specific
P1C91-LP	Glutamine synthetase	1.333e-17	AAK49029		Glutamine synthetase	7e-33	P23712		Non specific
P1C92-LP					Unknown protein	0.014			Non specific
P1C93-LP					Unknown protein	0.002			Non specific
P1C94-LP					Ribulose bisphosphate carboxylase small chain, chloroplastic	4e-32	Q40004		Non specific
P1C95-LP	Ferredoxin-nadp reductase	2.38098e-125	ADN33943		Ferredoxin--NADP reductase, root isozyme, chloroplastic	4e-62	Q41014		Non specific
P1C96-LP	Plastidic aldolase	3.12774e-69	XP_002333333		Fructose-bisphosphate aldolase, chloroplastic	2e-97	Q40677		Non specific
P1C97-LP	Cytochrome p450 like_tbp	3.53744e-28	ABO20848		Putative uncharacterized protein ART2/ Regulator of rDNA transcription protein 15	2e-53	Q8TGM7/ Q3E811		Non specific
P1C98-LP	ATP synthase beta subunit	4.30129e-68	ACV71742		ATP synthase subunit beta, chloroplastic	1e-76	Q0ZJ13		Non specific
P1C99-LP	ATP synthase beta subunit	1.10795e-31	AAX62969		ATP synthase subunit beta, chloroplastic	4e-39	Q0ZJ13		Non specific
P1C100-LP	Early light-inducible protein	2.97189e-37	XP_002312552		Early light-induced protein, chloroplastic/ Desiccation stress protein DSP-22, chloroplastic	1e-110	P11432/ Q01931		Non specific
P1C101-LP					Unknown protein	0.001			Non specific
P1C102-LP					Protein TAR1	0.021	Q6CQE5		Non specific
P1C103-LP	Light harvesting chlorophyll a b-binding protein	2.01232e-14	BAA25388		Chlorophyll a-b binding protein 21, chloroplastic	1e-44	P27493		Non specific
P1C104-LP					Protein TAR1	0.013	Q6CQE5		Non specific
P1C105-LP	Rubisco activase	1.67854e-56	ADM67704		Ribulose bisphosphate carboxylase/oxygenase activase, chloroplastic	5e-50	P93431		Non specific
P1C106-LP									Non specific
P1C107-LP	Photosystem ii 10 kda polypeptide	1.36346e-20	NP_001234042		Photosystem II 10 kDa polypeptide, chloroplastic	4e-62	Q40519		Non specific
P1C108-LP	Photosystem ii 32 kda protein	9.51457e-89	AEP82344		Photosystem Q(B) protein	5e-95	Q0ZJ40		Non specific
P1C109-LP	Thiazole biosynthetic enzyme	4.85172e-122	CCJ09780		Thiamine thiazole synthase, chloroplastic	1e-161	O23787		Non specific
P1C110-LP					Metallothionein-like protein 1	4e-32	P20238		Non specific
P1C111-LP									Non specific
P1C112-LP					Unknown protein	1e-42			Non specific
P1C113-LP	Partial	9.09956e-15	YP_003540962		Cytochrome b6-f complex subunit 4	1e-104	Q2MI70		Sustractive. Leaf specific
P1C114-LP	Chlorophyll a b binding protein	5.78307e-133	XP_002531690		Chlorophyll a-b binding protein, chloroplastic	1e-148	P12332		Non specific
P1C115-LP	Polyubiquitin	5.34932e-106	PS0380		Ubiquitin	4e-77	P69326		Non specific
P1C116-LP	Thioredoxin family protein	6.64632e-16	XP_002282520		Glycerate dehydrogenase/ Glyoxylate reductase	6,00E-14	P13443/ Q9C4M5		Non specific
P1C117-LP	Light harvesting chlorophyll a b-binding protein	3.38917e-120	XP_002455902		Chlorophyll a-b binding protein 21, chloroplastic	1e-132	P27493		Non specific
P1C118-LP	Metallothionein-like protein	7.57477e-20	ABY26949		Metallothionein-like protein type 3	7e-74	Q96386		Non specific
P1C119-LP	Galactinol synthase 1	1.33613e-09	ADM92588		Meiotically up-regulated gene 136 protein/ Glycogenin-2/ Uncharacterized protein C5H10.12c	9e-31	O43061/ O15488/ Q09680		Non specific
P1C120-LP					Protein TAR1	0.001	Q6CQE5		Non specific
P1C121-LP					Abscisic stress-ripening protein 1/ G-box-binding factor	2e-77	Q08655/ P36417		Non specific
P1C122-LP	Cytochrome b6 f complex subunit iv	5.66478e-17	CAA32269		Cytochrome b6-f complex subunit 4	9e-27	Q2MI70		Non specific
P1C123-LP					Unknown protein	0.17			Non specific
P1C124-LP					Integumentary mucin A.1/ Cell wall protein DAN4	3e-06	P10667/ P47179		Non specific
P1C125-LP	ABC transporter atp-binding protein	0.669377	XP_001641190		Acyl-CoA-binding protein	4e-06	O04066		Non specific
P1C126-LP	Senescence-associated protein	1.05895e-20	XP_003544026		Unknown protein	3e-31			Non specific
P1C127-LP					Unknown protein	0.002			Non specific
P1C128-LP					Glyceraldehyde-3-phosphate dehydrogenase, cytosolic	1e-81	P09094		Non specific
P1C129-LP	Chloroplast light-harvesting chlorophyll a b-binding protein	1.89311e-19	P10707		Chlorophyll a-b binding protein 21, chloroplastic	5e-36	P27493		Non specific
P1C130-LP	Metallothionein-like protein	3.5414e-16	AFP49330		Metallothionein-like protein 1	3e-45	P20238		Sustractive. Leaf specific
P1C131-LP	Lactoylglutathione lyase glyoxalase i-like protein	0.00153782	CAN67865		Lactoylglutathione lyase	5e-62	Q09751		Non specific
P1C132-LP	Photosystem ii protein	3.97604e-54	CAJ38395		Photosystem II 22 kDa protein, chloroplastic	1e-150	Q02060		Non specific
P1C133-LP	Ribulose- -bisphosphate carboxylase oxygenase small subunit	5.23115e-20	Q02980		Ribulose bisphosphate carboxylase small chain, chloroplastic	4e-62	Q40004		Non specific
P1C134-LP	Polyubiquitin	9.44723e-109	AEW46688		Ubiquitin	1e-78	P69326		Non specific
P1C135-LP					3-oxoacyl-[acyl-carrier-protein] synthase I, chloroplastic	0.62	P23902		Non specific
P1C136-LP	H-protein	9.10523e-69	CAN76620		Glycine cleavage system H protein, mitochondrial	1e-108	Q39732		Non specific
P1C137-LP	Photosystem ii 32 kda protein	1.1832e-72	ACN39170		Photosystem Q(B) protein	1e-80	Q0ZJ40		Non specific
P1C138-LP	Oligoribonuclease	9.42201e-44	XP_002515659		PHD finger protein ALFIN-LIKE 4	0.0003	O81488		Non specific
P1C139-LP	Chloroplast ribulose- -bisphosphate carboxylase oxygenase small subunit	3.55621e-10	ABS71998		Ribulose bisphosphate carboxylase small chain, chloroplastic	1e-20	Q40004		Non specific
P1C140-LP	1-aminocyclopropane-1-carboxylate oxidase	6.75082e-41	BAF33502		1-aminocyclopropane-1-carboxylate oxidase	2e-54	P31237		Non specific
P1C141-LP					Unknown protein	1e-05			Non specific
P1C142-LP	Galactinol synthase 1	9.9554e-54	ACA04029		Meiotically up-regulated gene 136 protein/ Glycogenin-2/ Uncharacterized protein C5H10.12c	1e-43	O43061/ O15488/ Q09680		Non specific
P1C143-LP					Unknown protein	6e-06			Non specific
P1C144-LP	Heavy-metal-associated domain--containing protein	2.64871e-55	XP_002323124		Unknown protein	5,00E-46			Non specific
P1C145-LP	Plasma membrane intrinsic protein	3.87821e-27	AAW80918		Probable aquaporin PIP2-3	3e-37	Q7XUA6		Sustractive. Leaf specific
P1C146-LP	Ribulose bisphosphate small subunit	9.85696e-21	CCJ09777		Ribulose bisphosphate carboxylase small chain, chloroplastic	7e-35	Q40004		Non specific
P1C147-LP					Phospholipase D gamma 1	0.26	Q9T053		Non specific
P1C148-LP					Abscisic stress-ripening protein 1/ G-box-binding factor	1e-138	Q08655/ P36417		Non specific
P1C149-LP	Lipid transfer protein precursor	5.06961e-33	CCJ09772		Non-specific lipid-transfer protein	1e-102	P10976		Non specific
P1C150-LP					Integumentary mucin A.1/ Cell wall protein DAN4	1e-08	P10667/ P47179		Non specific
P1C151-LP	Light harvesting chlorophyll a b-binding protein	1.67407e-113	BAA25394		Chlorophyll a-b binding protein 21, chloroplastic	1e-126	P27493		Non specific
P1C152-LP	Polyubiquitin	8.38757e-121	ACD31680		Ubiquitin	6e-86	P69326		Non specific
P1C153-LP					Metallothionein-like protein 1	4e-33	P20238		Non specific
P1C154-LP	Rubredoxin-like protein	3.60953e-17	CBI15769		Rubredoxin	4e-13	P24297		Non specific
P1C155-LP	Light harvesting chlorophyll a b-binding protein	1.50892e-135	ABF70112		Chlorophyll a-b binding protein 21, chloroplastic	1e-143	P27493		Non specific
P1C156-LP	Granule-bound starch synthase	1.22238e-108	CBH29615		Granule-bound starch synthase 1, chloroplastic/amyloplastic	1e-134	O82627		Non specific
P1C157-LP	Inner membrane protein albino3	5.70765e-47	ACN30848		ALBINO3-like protein 1, chloroplastic/ Inner membrane protein PPF-1, chloroplastic	2e-40	Q9FYL3/ Q9FY06		Non specific
P1C158-LP	Galactinol synthase	7.7837e-35	ACT34765		Dynamin-2A	0.65	Q9SE83		Non specific
P1C159-LP	1-hydroxy-2-methyl-butenyl 4-diphosphate reductase	4.39199e-52	ABI30631		4-hydroxy-3-methylbut-2-enyl diphosphate reductase	5,00E-92	Q8DK29		Non specific
P1C160-LP	Ribulose- -bisphosphate carboxylase oxygenase small subunit	2.92286e-19	XP_002532149		Ribulose bisphosphate carboxylase small chain, chloroplastic	4e-63	Q40004		Non specific
P1C161-LP	Chloroplast omega-3 fatty acid desaturase	4.66248e-31	NP_001049795		Omega-3 fatty acid desaturase, chloroplastic	1e-42	P48619		Sustractive. Leaf specific
P1C162-LP					Unknown protein	5e-18			Non specific
P1C163-LP	Metallothionein-like protein	2.13149e-14	AFP49330		Metallothionein-like protein 1	9e-96	P20238		Non specific
P1C164-LP					Cytochrome b6-f complex subunit 4	2e-69	Q2MI70		Non specific
P1C165-LP	Unknown protein (chloroplast) [Nicotiana tabacum]	2.95385e-08	AAA84679		ATP synthase subunit a, chloroplastic	3e-78	P30391		Non specific
P1C166-LP	Galactinol synthase	1.4458e-20	Q9XGN4		NAD(P)H-quinone oxidoreductase subunit J, chloroplastic	5e-36	P12201		Non specific
P1C167-LP					Photosystem II D2 protein	8e-08	Q9BBT0		Non specific
P1C168-LP					Integumentary mucin A.1/ Cell wall protein DAN4	3e-18	P10667/ P47179		Non specific
P1C169-LP					Unknown protein	7e-43			Non specific
P1C170-LP	Rwp-rk domain-containing protein	5.5099e-15	XP_002518861		Integumentary mucin A.1/ Cell wall protein DAN4	1e-28	P10667/ P47179		Non specific
P1C171-LP	Senescence-associated protein	3.9916e-52	ABO20851		Unknown protein	1e-60			Non specific
P1C172-LP					Zeaxanthin epoxidase, chloroplastic	0.18	Q40412		Non specific
P1C173-LP	RNA polymerase sigma subunit 1	4.13304e-39	XP_002524027		Unknown protein	1e-72			Non specific
P1C174-LP	High-affinity phosphate transporter 4	1.0043e-42	BAA20522		Ubiquitin	1e-50	P69326		Non specific
P1C175-LP	Metallothionein-like protein	2.47894e-18	NP_001234585		Metallothionein-like protein type 3	6e-72	Q96386		Non specific
P1C176-LP	Polyubiquitin	2.65877e-69	AAR32784		Ubiquitin	1e-66	P69326		Non specific
P1C177-LP	Ribulose- -bisphosphate carboxylase oxygenase small subunit	2.31935e-20	XP_002532149		Ribulose bisphosphate carboxylase small chain, chloroplastic	6e-62	Q40004		Non specific
P1C178-LP	Unknown protein (chloroplast) [Nicotiana tabacum]	3.66176e-08	AAA84679		ATP synthase subunit a, chloroplastic	3e-78	P30391		Non specific
P1C179-LP	Chlorophyll a-b binding protein	4.65786e-55	3LW5_2		Chlorophyll a-b binding protein 7, chloroplastic	3e-90	P10708		Non specific
P1C180-LP	Senescence-associated protein	6.63082e-50	ACA30301		Unknown protein	1e-61			Non specific
P1C181-LP	Light harvesting chlorophyll a b-binding protein	9.63854e-16	BAA25388		Chlorophyll a-b binding protein 21, chloroplastic	7e-46	P27493		Non specific
P1C182-LP	Cytochrome b6	2.55439e-58	ADD31091		Cytochrome b6-f complex subunit 4	9e-60	Q2MI70		Non specific
P1C183-LP					Unknown protein	0.001			Non specific
P1C184-LP	23s ribosomal rna	2.35769e-37	XP_003610225		Unknown protein	4e-34			Non specific
P1C185-LP					Unknown protein	0.078			Non specific
P1C186-LP	ATP synthase cf0 a subunit	1.81848e-89	YP_588108		ATP synthase subunit a, chloroplastic	1e-105	P30391		Non specific
P1C187-LP	U2 snrnp auxiliary small	1.82991e-24	CBI30239		Animal Splicing factor U2AF 35 kDa subunit	3e-48	Q9D883		Non specific
P1C188-LP					Chlorophyll a-b binding protein 21, chloroplastic	4e-07	P27493		Non specific
P1C189-LP	Polyol transporter	1.16422e-50	AAZ80876		Polyol transporter 5	3e-79	Q8VZ80		Non specific
P1C190-LP	Metallothionein-like protein	9.94172e-18	AFK33631		Metallothionein-like protein type 3	4e-61	Q96386		Non specific
P1C191-LP	Receptor protein	1.01001e-61	AAF66615		Probable receptor protein kinase TMK1	3e-53	P43298		Non specific
P1C192-LP	Chlorophyll a-b binding protein 2	8.26886e-86	AAC25775		Chlorophyll a-b binding protein 21, chloroplastic	1e-101	P27493		Sustractive. Leaf specific
