# Supplementary material for: Identification and Functional Annotation of Genes Differentially Expressed in the Reproductive Tissues of the Olive Tree (Olea europaea L.) through the Generation of Subtractive Libraries
Source: Front Plant Sci. 2017 Sep 13;8:1576. doi: 10.3389/fpls.2017.01576 (PMC5601413; doi:10.3389/fpls.2017.01576)
Supplement: Supplementary file 6 [file Table6.XLSX]

## Sheet: Sheet1
Sample	BLAST NCBI DATABASE	(eValue (<E-04)	Accesion number		BLAST OLEAEST DATABASE	(eValue (<E-04)	Id Uniprot		Screening Results
P1C1-PoL									Sustractive. Pollen specific			Sequences without a significant similarity are boxed in orange
P1C2-PoL	Late embryogenesis	1.05809e-24	CBI17507		DnaJ protein homolog ANJ1/ Animal Dual oxidase 2	0.072	P43644/ Q8HZK2		Sustractive. Pollen specific
P1C3-PoL	Transmembrane bax inhibitor motif-containing protein	1.95533e-36	XP_002312548		BI1-like protein/ Animal Protein lifeguard 3/ Bax inhibitor 1	3e-44	Q94A20/ Q969X1/ O74888		Sustractive. Pollen specific
P1C4-PoL	Protein	1.51346e-39	XP_002520406		Sugar carrier protein C		Q41144		Sustractive. Pollen specific
P1C5-PoL									Sustractive. Pollen specific
P1C6-PoL	Ole e allergen precursor	1.62415e-82	ACZ57582		Pectinesterase 3	7e-09	Q96576		Sustractive. Pollen specific
P1C7-PoL					Protein TAR1	0.001	Q6CQE5		Sustractive. Pollen specific
P1C8-PoL	Sec14-like 3 protein	9.28356e-64	XP_002521526		SEC14 cytosolic factor	4e-48	P45816		Sustractive. Pollen specific
P1C9-PoL	Pectate lyase	2.34731e-41	CBI15265		Probable pectate lyase 18	3e-32	Q9C5M8		Sustractive. Pollen specific
P1C10-PoL									Sustractive. Pollen specific
P1C11-PoL					Animal RNA-binding protein 38	0.74	Q9H0Z9		Sustractive. Pollen specific
P1C12-PoL									Sustractive. Pollen specific
P1C13-PoL	Myosin heavy chain-like protein	1.48294e-50	CBI30969		Unknown protein	0.009			Non specific
P1C14-PoL	Pectate lyase	4.94687e-41	CBI15265		Probable pectate lyase 18	8e-32	Q9C5M8		Non specific
P1C15-PoL	Delta-12 desaturase	7.12663e-60	AFK31315		Omega-6 fatty acid desaturase, endoplasmic reticulum	8e-54	P46313		Sustractive. Pollen specific
P1C16-PoL	Probable pectinesterase pectinesterase inhibitor 21-like	9.75957e-49	XP_002298186		Pectinesterase/pectinesterase inhibitor U1	7e-36	Q43143		Sustractive. Pollen specific
P1C17-PoL					Animal Ribosome biogenesis protein BMS1 homolog	0.017	Q14692		Sustractive. Pollen specific
P1C18-PoL					Animal RCC1 domain-containing protein 1/ Probable E3 ubiquitin-protein ligase HERC2	0.0003	Q8BTU7/ Q9VR91		Sustractive. Pollen specific
P1C19-PoL					V-type proton ATPase subunit C	0.046	Q9SDS7		Sustractive. Pollen specific
P1C20-PoL	Amino acid	8.88623e-20	XP_003573327		Unknown protein	3e-36			Sustractive. Pollen specific
P1C21-PoL	Anion exchanger family protein	8.26627e-48	XP_002281778		Boron transporter 1	6e-32	Q8VYR7		Sustractive. Pollen specific
P1C22-PoL	Major pollen allergen ole e partial	7.33458e-68	E53806		Olee1-like protein	2e-08	O49813		Sustractive. Pollen specific
P1C23-PoL					Unknown protein	0.0003			Sustractive. Pollen specific
P1C24-PoL					2,3-bisphosphoglycerate-independent phosphoglycerate mutase	0.065	O24246		Sustractive. Pollen specific
P1C25-PoL	Hypothetical protein VITISV_033282 [Vitis vinifera]	0.300789	CAN81862		Animal Fatty acid 2-hydroxylase	3e-08	Q2LAM0		Sustractive. Pollen specific
P1C26-PoL					Pectinesterase 2	0.005	O04887		Sustractive. Pollen specific
P1C27-PoL					Unknown protein	0.0009			Sustractive. Pollen specific
P1C28-PoL	Ankyrin repeat family protein	3.81703e-28	XP_002268421		Anima E3 ubiquitin-protein ligase RNF8/ RING finger protein 141	0.26	Q2HJ46/ Q5ZM74		Sustractive. Pollen specific
P1C29-PoL	Sugar transport protein	0.000616166	XP_003589734		Sugar carrier protein A	0.003	Q10710		Sustractive. Pollen specific
P1C30-PoL	Adp-ribosylation factor gtpase-activating protein agd10	3.02978e-12	XP_002326525		Histone H3.3	2e-09	Q71H73		Non specific
P1C31-PoL	Major pollen allergen ole e partial	4.48119e-67	ABP58636		Olee1-like protein	5e-08	O49813		Non specific
P1C32-PoL	Cazy family gt8	2.77845e-36	XP_003557847		Galacturonosyltransferase 8	1e-32	Q9LSG3		Sustractive. Pollen specific
P1C33-PoL	Glucan endo- -beta-glucosidase	1.11805e-93	XP_002310612		Glucan endo-1,3-beta-glucosidase 8	4e-13	Q6NKW9		Sustractive. Pollen specific
P1C34-PoL					Unknown protein	0.037			Sustractive. Pollen specific
P1C35-PoL	Protein	2.55924e-41	XP_003535258		Histone deacetylase 19	0.47	O22446		Sustractive. Pollen specific
P1C36-PoL	Protein	7.4042e-81	XP_002513329		Potassium transporter	0.038	O22881		Sustractive. Pollen specific
P1C37-PoL	Late embryogenesis abundant hydroxyproline-rich glycoprotein	1.59255e-06	XP_002533836		Peptidyl-prolyl cis-trans isomerase	0.43	Q39613		Sustractive. Pollen specific
P1C38-PoL	Peroxidase 37-like	2.07721e-19	XP_003520954		Peroxidase 72	2e-15	Q9FJZ9		Sustractive. Pollen specific
P1C39-PoL	Protein kinase	2.92797e-132	XP_003553436		Serine/threonine-protein kinase PBS1/ Protein STRUBBELIG-RECEPTOR FAMILY 8	2e-65	Q9FE20/ Q6R2J8		Sustractive. Pollen specific
P1C40-PoL									Sustractive. Pollen specific
P1C41-PoL									Sustractive. Pollen specific
P1C42-PoL					Unknown protein	0.003			Sustractive. Pollen specific
P1C43-PoL					Animal Plasminogen activator inhibitor 1 RNA-binding protein	0.29	Q9CY58		Sustractive. Pollen specific
P1C44-PoL	ATP binding	9.55391e-34	XP_002319081		Receptor-like protein kinase HERK 1	0.019	Q9LX66		Sustractive. Pollen specific
P1C45-PoL	Phosphoinositide 4-kinase gamma 4	4.85973e-61	XP_002320202		Animal Phosphatidylinositol 4-kinase type 2-beta	2e-48	Q5ZIK0		Non specific
P1C46-PoL	peroxidase 37-like	1.83507e-19	XP_003520954		Peroxidase 72	6e-16	Q9FJZ9		Non specific
P1C47-PoL	Calcium-dependent protein kinase 17-like	2.35849e-35	XP_002526062		Calcium-dependent protein kinase 2	2e-33	P49101		Non specific
P1C48-PoL	ATP binding	5.7868e-42	XP_002266413		Universal stress protein A-like protein	0.0008	Q8LGG8		Non specific
P1C49-PoL	Cation proton exchanger	4.61817e-36	NP_188390		Calmodulin	0.37	0.97		Sustractive. Pollen specific
P1C50-PoL	Cation proton exchanger	4.86014e-37	XP_002516306		NADPH--cytochrome P450 reductase	0.02	Q05001		Sustractive. Pollen specific
P1C51-PoL	Polygalacturonase	8.96072e-54	ADK92878		Polygalacturonase	4e-20	P48979		Sustractive. Pollen specific
P1C52-PoL	Autoinhibited h+ atpase	1.93665e-120	AAF97591		ATPase 4, plasma membrane-type	2e-78	Q9SU58		Sustractive. Pollen specific
P1C53-PoL	Myosin heavy chain-like protein	1.46472e-48	CBI30969		Pentatricopeptide repeat-containing protein At1g64583, mitochondrial	0.73	P0C7R3		Sustractive. Pollen specific
P1C54-PoL					Unknown protein	0.26			Sustractive. Pollen specific
P1C55-PoL									Sustractive. Pollen specific
P1C56-PoL	Major pollen allergen ole e partial	1.49411e-42	C53806		Olee1-like protein	6e-12	O49813		Sustractive. Pollen specific
P1C57-PoL					Unknown protein	8e-07			Sustractive. Pollen specific
P1C58-PoL					Animal Anaphase-promoting complex subunit 1	0.37	Q9H1A4		Sustractive. Pollen specific
P1C59-PoL	U-box domain-containing protein	9.11426e-11	XP_003631778		Novel plant SNARE 13	0.53	Q9LRP1		Non specific
P1C60-PoL					Unknown protein	0.008			Non specific
P1C61-PoL	Beta-galactosidase	4.32324e-81	ACC60982		Beta-galactosidase 1	2e-15	Q9SCW1		Non specific
P1C62-PoL	Syntaxin-124	4.77228e-129	XP_003545852		Syntaxin-132	2e-39	Q8VZU2		Non specific
P1C63-PoL	Gdsl esterase lipase	6.26503e-38	XP_002267715		Esterase/ Alpha-L-fucosidase 3	0.0005	Q7Y1X1/ Q9FXE5		Non specific
P1C64-PoL	Microsomal delta-12 oleate desaturase	3.78388e-73	AAW63040		Omega-6 fatty acid desaturase, endoplasmic reticulum isozyme 2	2e-68	P48631		Non specific
P1C65-PoL	AF378084_1PNCBP [Solanum tuberosum]	0.194112	AAL48201		Animal AP-1 complex subunit sigma-2	0.037	B0G185		Sustractive. Pollen specific
P1C66-PoL					Unknown protein	0.12			Sustractive. Pollen specific
P1C67-PoL	Predicted protein [Populus trichocarpa]	0.000216318	XP_002329513		Unknown protein	0.14			Sustractive. Pollen specific
P1C68-PoL	Polygalacturonase	3.50445e-53	ADK92878		Polygalacturonase	5e-20	P48979		Sustractive. Pollen specific
P1C69-PoL	Polcalcin nic t 1-like	1.80754e-45	O81092		Calcium-binding allergen Ole e 8	6e-13	Q9M7R0		Sustractive. Pollen specific
P1C70-PoL	Protein	9.43232e-37	XP_003541915		Unknown protein	2e-58			Sustractive. Pollen specific
P1C71-PoL					3-ketoacyl-CoA synthase 19	0.47	Q9FG87		Sustractive. Pollen specific
P1C72-PoL	Polcalcin nic t 1-like	3.54598e-46	O81092		Calcium-binding allergen Ole e 8	3e-13	Q9M7R0		Sustractive. Pollen specific
P1C73-PoL	Subtilase family protein	5.19189e-67	XP_002518937		Subtilisin-like protease/ Xylem serine proteinase 1/ Cucumisin	1e-27	O65351/ Q9LLL8/ Q39547		Sustractive. Pollen specific
P1C74-PoL	L-ascorbate oxidase homolog	1.25031e-17	AAQ90182		L-ascorbate oxidase homolog/ Monocopper oxidase-like protein SKU5	3e-17	Q00624/ Q9SU40		Sustractive. Pollen specific
P1C75-PoL					Unknown protein				Non specific
P1C76-PoL	Auxin-induced in root cultures protein 12	5.35863e-21	XP_002533060		Auxin-induced in root cultures protein 12	2e-11	Q94BT2		Sustractive. Pollen specific
P1C77-PoL	Xyloglucan:xyloglucosyl transferase	2.3147e-94	XP_002275971		Probable xyloglucan endotransglucosylase/hydrolase protein 30	4e-57	Q38908		Non specific
P1C78-PoL	Heat shock protein binding	0.000261898	XP_002279725		Chaperone protein DnaJ	2e-07	Q128K1		Non specific
P1C79-PoL	Endoglucanase 16-like	5.64008e-63	CAN82881		Endoglucanase 9	3e-18	Q9C9H5		Non specific
P1C80-PoL	Transferring glycosyl	4.02044e-78	XP_002524800		Flocculation protein FLO11	6e-15	P08640		Non specific
P1C81-PoL	Plant invertase pectin methylesterase inhibitor domain-containing protein	6.5442	XP_002882486		3-oxoacyl-[acyl-carrier-protein] reductase, chloroplastic	0.086	P28643		Sustractive. Pollen specific
P1C82-PoL	Plasma membrane h+ atpase	7.52121e-29	ABM68570		ATPase 3, plasma membrane-type	3e-30	P20431		Sustractive. Pollen specific
P1C83-PoL					Unknown protein	0.029			Sustractive. Pollen specific
P1C84-PoL					Unknown protein				Sustractive. Pollen specific
P1C85-PoL					Unknown protein	1e-32			Sustractive. Pollen specific
P1C86-PoL	Predicted protein [Populus trichocarpa]	2.1857e-06	XP_002329513		Unknown protein	0.04			Sustractive. Pollen specific
P1C87-PoL					Unknown protein	0.86			Sustractive. Pollen specific
P1C88-PoL	Snare associated golgi protein family	1.33671e-34	CAB78081		Uncharacterized membrane protein At4g09580	8e-52	Q8L586		Sustractive. Pollen specific
P1C89-PoL	Receptor serine-threonine protein	1.42809e-35	XP_002893124		Probable serine/threonine-protein kinase NAK/ Protein kinase APK1A, chloroplastic	3e-26	P43293/ Q06548		Sustractive. Pollen specific
P1C90-PoL					Unknown protein	0.01			Sustractive. Pollen specific
P1C91-PoL	ATP binding	8.93404e-40	XP_002266413		Universal stress protein A-like protein	0.001	Q8LGG8		Non specific
P1C92-PoL	Protein	6.23902e-28	XP_002268421		Unknown protein	0.094			Non specific
P1C93-PoL	Cation h(+) antiporter 15-like	4.41951e-54	XP_002516306		Acidic endochitinase	0.89	P17541		Non specific
P1C94-PoL	Polyol transporter	1.61846e-49	AAO39267		Putative polyol transporter 1	3e-59	Q9XIH7		Non specific
P1C95-PoL					Unknown protein	0.002			Non specific
P1C96-PoL					Unknown protein	0.006			Non specific
P1C97-PoL	H(\+)-transporting atpase plant fungi plasma membrane	5.44812e-80	CBN72504		ATPase 3, plasma membrane-type	1e-59	P20431		Sustractive. Pollen specific
P1C98-PoL					Abscisic stress-ripening protein 1/ G-box-binding factor	0.19	Q08655/ P36417		Sustractive. Pollen specific
P1C99-PoL					Probable voltage-gated potassium channel subunit beta	0.038	Q40648		Sustractive. Pollen specific
P1C100-PoL	Sphingolipid delta -desaturase des1-like	1.47771e-92	NP_001234676		Anamial Sphingolipid delta(4)-desaturase DES1	1e-45	Q5RE51		Sustractive. Pollen specific
P1C101-PoL	Glucan endo- -beta-glucosidase	1.97019e-09	NP_001234416		5'-AMP-activated protein kinase subunit gamma-2/ Glucan endo-1,3-beta-glucosidase	3e-10	Q91WG5/ P52409		Sustractive. Pollen specific
P1C102-PoL	Succinate dehydrogenase	5.53317e-46	XP_002985229		Succinate dehydrogenase [ubiquinone] flavoprotein subunit, mitochondrial	6e-43	Q6ZDY8		Sustractive. Pollen specific
P1C103-PoL	Fatty acid desaturase	1.16776e-33	AAQ08982		Omega-6 fatty acid desaturase, endoplasmic reticulum isozyme 2	2e-42	P48631		Sustractive. Pollen specific
P1C104-PoL	Autoinhibited h+ atpase	1.77164e-69	AAO92440		Plasma membrane ATPase	1e-43	P83970		Sustractive. Pollen specific
P1C105-PoL	Cation h(+) antiporter 15-like	1.6833e-54	XP_002516306		Acidic endochitinase	0.89	P17541		Sustractive. Pollen specific
P1C106-PoL	Pectate lyase	8.45927e-64	XP_002311599		Probable pectate lyase 1	6e-40	Q940Q1		Non specific
P1C107-PoL									Sustractive. Pollen specific
P1C108-PoL	Carbonic anhydrase	6.51407e-129	ABI14813		Carbonic anhydrase 2	1e-53	P46513		Sustractive. Pollen specific
P1C109-PoL	Pathogenesis-related protein	3.06374e-09	XP_002867590		Pathogenesis-related protein PR-1	1e-05	Q40374		Non specific
P1C110-PoL	Cyclase family protein	2.39075e-54	XP_002518694						Non specific
P1C111-PoL	Delta-12 oleate desaturase	5.44463e-33	ADZ39687		Omega-6 fatty acid desaturase, endoplasmic reticulum isozyme 2	1e-28	P48631		Non specific
P1C112-PoL	Pectate lyase	2.27921e-37	XP_002282500		Probable pectate lyase 12	3e-36	Q9SCP2		Non specific
P1C113-PoL	Hypothetical protein VITISV_015170 [Vitis vinifera]	8.57671e-46	CAN68990		Unknown protein	1e-18			Sustractive. Pollen specific
P1C114-PoL	Plant invertase pectin methylesterase inhibitor domain-containing protein	1.11448e-23	XP_002519216		Unknown protein	0.002			Sustractive. Pollen specific
P1C115-PoL	Pectate lyase	0.519992	BAK05605		Probable pectate lyase 5	4e-07	Q9FXD8		Sustractive. Pollen specific
P1C116-PoT	Probable serine threonine-protein kinase rlckvii-like	1.23945e-100	XP_003539745		Serine/threonine-protein kinase PBS1/ Protein STRUBBELIG-RECEPTOR FAMILY 7		Q9FE20/ Q9LUL4		Sustractive. Pollen specific
P1C117-PoL	U-box domain-containing protein	2.44895e-11	XP_003631778		Novel plant SNARE 13	0.29	Q9LRP1		Sustractive. Pollen specific
P1C118-PoL	Hexose transporter	1.465e-86	CBI25296		Sugar carrier protein C	6e-20	Q41144		Sustractive. Pollen specific
P1C119-PoL	Hexose transporter	5.79389e-32	ADP37146		Hexose carrier protein HEX6	9e-13	Q07423		Sustractive. Pollen specific
P1C120-PoL					Unknown protein	0.2			Sustractive. Pollen specific
P1C121-PoL	Ubiquitin-conjugating enzyme family protein	11.6259	ACF06539		Ubiquitin-conjugating enzyme E2 variant 1C	2e-06	Q9SJ44		Sustractive. Pollen specific
P1C122-PoL	Clathrin assembly	2.1691e-22	XP_002523765		Putative clathrin assembly protein At5g35200	4e-10	Q9LHS0		Sustractive. Pollen specific
P1C123-PoL	Phospholipase d delta	1.99523e-25	CBI18911		Unknown protein	3e-05			Sustractive. Pollen specific
P1C124-PoL									Sustractive. Pollen specific
P1C125-PoL	Pectate lyase family protein	0.00295839	AAB69766		Probable pectate lyase 5	0.003	Q9FXD8		Sustractive. Pollen specific
P1C126-PoL	Cbl-interacting serine threonine-protein kinase 11-like	6.58033e-113	XP_002517709		CBL-interacting serine/threonine-protein kinase 6	2e-83	O65554		Sustractive. Pollen specific
P1C127-PoL	Potassium channel	1.20838e-91	BAD81034		Potassium channel AKT2/3	1e-24	Q38898		Non specific
P1C128-PoL	Protein	1.14902e-77	AAG14416		Polygalacturonase	9e-45	P48979		Non specific
P1C129-PoL	Ccr4-not transcription complex subunit	3.58672e-13	XP_002281895		Unknown protein	5e-08			Sustractive. Pollen specific
P1C130-PoL	At4g03420 f9h3_4	4.84818e-29	XP_002319915		Unknown protein	1e-28			Sustractive. Pollen specific
P1C131-PoL					RuBisCO large subunit	0.49	P61293		Sustractive. Pollen specific
P1C132-PoL									Sustractive. Pollen specific
P1C133-PoL	U-box domain-containing protein 35-like	2.26081e-07	XP_003564167		U-box domain-containing protein 51	0.001	Q9FKG5		Sustractive. Pollen specific
P1C134-PoL	Pectate lyase	7.42735e-24	XP_003613595		Probable pectate lyase 18	3e-30	Q9C5M8		Sustractive. Pollen specific
P1C135-PoL					Unknown protein	2e-10			Sustractive. Pollen specific
P1C136-PoL	Protein	1.72028e-27	XP_002268421		RING-H2 finger protein ATL47	0.26	Q8GW38		Sustractive. Pollen specific
P1C137-PoL	Pollen specific protein	4.96786e-74	AAD02557		L-ascorbate oxidase homolog (Pollen-specific protein NTP303)/ Monocopper oxidase-like protein SKU5	2e-38	P29162/ Q9SU40		Sustractive. Pollen specific
P1C138-PoL	Major pollen allergen ole e partial	1.18574e-14	A38968		Animal ATP-binding cassette sub-family F member 2	0.92	Q99LE6		Sustractive. Pollen specific
P1C139-PoL					Serine/threonine-protein phosphatase BSL3	0.33	Q9SHS7		Sustractive. Pollen specific
P1C140-PoL	Calcium binding protein	1.6766e-63	XP_002531819		Calcium-binding allergen Bet v 3	1e-46	P43187		Sustractive. Pollen specific
P1C141-PoL					Tyramine N-feruloyltransferase 4/11	0.59	Q9SMB8		Sustractive. Pollen specific
P1C142-PoL	Sugar transport protein	1.24704e-53	AAC61852		Sugar carrier protein C	7e-30	Q41144		Sustractive. Pollen specific
P1C143-PoL	At4g03420 f9h3_4	6.99437e-63	XP_002517959		Unknown protein	7e-43			Non specific
P1C144-PoL	Pollen specific protein	2.6544e-47	AAQ90185		L-ascorbate oxidase homolog (Pollen-specific protein NTP303)/ Monocopper oxidase-like protein SKU5	6e-28	P29162/ Q9SU40		Non specific
P1C145-PoL									Sustractive. Pollen specific
P1C146-PoL	Phosphoric diester	4.73959e-35	CBI17501		Tubby-like F-box protein 6	4e-36	Q0WPY0		Sustractive. Pollen specific
P1C147-PoL	Predicted protein [Populus trichocarpa]	0.0785279	XP_002309319		Unknown protein	4e-07			Sustractive. Pollen specific
P1C148-PoL	Serine threonine-protein kinase pbs1-like	1.57997e-22	XP_002319828		Serine/threonine-protein kinase PBS1	7e-10	Q9FE20		Sustractive. Pollen specific
P1C149-PoL	Hexose transporter	4.84763e-32	ADP37146		Hexose carrier protein HEX6	9e-13	Q07423		Sustractive. Pollen specific
P1C150-PoL	Probable phosphatidylinositol 4-kinase type 2-beta at1g26270-like	1.40967e-27	XP_002523668		Unknown protein	3e-34			Sustractive. Pollen specific
P1C151-PoL									Sustractive. Pollen specific
P1C152-PoL	Hypothetical protein 111018.17 [Coffea canephora]	5.37201	AEI98630						Sustractive. Pollen specific
P1C153-PoL	Probable polygalacturonase-like	4.26515e-69	XP_003536450		Polygalacturonase	4e-37	P27644		Sustractive. Pollen specific
P1C154-PoL					14-3-3 protein 6	0.029	P93211		Sustractive. Pollen specific
P1C155-PoL					Polyneuridine-aldehyde esterase	0.093	Q9SE93		Sustractive. Pollen specific
P1C156-PoL	Alpha tubulin 1	2.69711e-132	XP_002263822		Tubulin alpha chain	1e-154	P33629		Sustractive. Pollen specific
P1C157-PoL									Sustractive. Pollen specific
P1C158-PoL	Novel plant snare 11	1.60771e-62	XP_002282944		Novel plant SNARE 12	9e-52	Q9LNH6		Non specific
P1C159-PoL	Sulfite oxidase	0.000202098	BAE48793		Unknown protein	8e-47			Non specific
P1C160-PoL	Major pollen allergen ole e partial	9.36896e-66	E53806		Olee1-like protein	3e-07	O49813		Non specific
P1C161-PoL	Centromere protein s	9.22042e-49	XP_002284609		Animal Centromere protein S	7e-48	Q8N2Z9		Sustractive. Pollen specific
P1C162-PoL	Late embryogenesis	1.11307e-25	CBI17507		SEC12-like protein 2	0.14	Q39221		Sustractive. Pollen specific
P1C163-PoL					Aspartate aminotransferase, cytoplasmic isozyme 1	0.08	P46645		Sustractive. Pollen specific
P1C164-PoL					Unknown protein	0.0005			Sustractive. Pollen specific
P1C165-PoL					Animal Anaphase-promoting complex subunit 1	0.37	Q9H1A4		Sustractive. Pollen specific
P1C166-PoL	Thioredoxin h-type 9	0.0027951	AEC03318		Thioredoxin H-type	6e-13	P85801		Sustractive. Pollen specific
P1C167-PoL					Cellulose synthase A catalytic subunit 8 [UDP-forming]	0.54	Q8LPK5		Sustractive. Pollen specific
P1C168-PoL	3 protein	1.88023e-12	XP_002459566		NAC domain-containing protein 19	2e-54	Q9C932		Sustractive. Pollen specific
P1C169-PoL	Pathogenesis-related protein class i	8.27417e-10	AEH25622		Pathogenesis-related protein PR-1	0.001	Q40374		Sustractive. Pollen specific
P1C170-PoL					Pollen-specific protein SF3/ Xin actin-binding repeat-containing protein 2/ LIM domain and actin-binding protein 1	0.025	P29675/ Q4U4S6/ Q9ERG0		Sustractive. Pollen specific
P1C171-PoL					Animal Plasminogen activator inhibitor 1 RNA-binding protein	0.2	Q9CY58		Sustractive. Pollen specific
P1C172-PoL	Phosphatidylinositol- -trisphosphate 3-phosphatase and dual-specificity protein phosphatase pten	1.28114e-37	XP_002532895		Animal Mitochondrial 2-oxoglutarate/malate carrier protein	0.42	Q9CY58		Sustractive. Pollen specific
P1C173-PoL	ATP binding microtubule motor family protein	2.7877e-16	BAF00728		Protein claret segregational/ Kinesin-like protein KIF3C	4e-18	P20480/ O55165		Non specific
P1C174-PoL					Unknown protein	2e-10			Non specific
P1C175-PoL					Probable mannitol dehydrogenase	0.17	Q9ZRF1		Non specific
P1C176-PoL	Lactoylglutathione lyase glyoxalase i-like protein	0.093337	ACG48997		Metallothiol transferase fosB 1/ Lactoylglutathione lyase	2e-07	Q81RK2/ Q8H0V3		Non specific
P1C177-PoL					Unknown protein	0.018			Sustractive. Pollen specific
P1C178-PoL	Pollen specific protein	1.39031e-45	AAQ90182		L-ascorbate oxidase homolog (Pollen-specific protein NTP303)/ Monocopper oxidase-like protein SKS2	3e-33	P29162/ Q9FHN6		Sustractive. Pollen specific
P1C179-PoL	Minor allergen	7.53773e-21	AEI98629		Flavoprotein WrbA/ P25 protein/ Minor allergen Alt a 7	3e-26	Q8Z7N9/ P30821/ P42058		Sustractive. Pollen specific
P1C180-PoL									Sustractive. Pollen specific
P1C181-PoL	Asol_tobac ame: full=l-ascorbate oxidase homolog ame: full=pollen-specific protein ntp303 flags: precursor	5.56255	P29162						Sustractive. Pollen specific
P1C182-PoL	Protein	4.19328e-73	XP_002525765		Unknown protein	2e-43			Non specific
P1C183-PoL	Calcium-dependent protein kinase 17	2.27025e-65	CAG27840		Calcium-dependent protein kinase 7	4e-40	Q38873		Non specific
P1C184-PoL	Major pollen allergen ole e partial	7.06052e-68	E53806		Olee1-like protein	2e-08	O49813		Non specific
P1C185-PoL	Major pollen allergen ole e partial	4.50638e-60	E53806		Olee1-like protein	2e-05	O49813		Non specific
P1C186-PoL	Apoplastic invertase	6.78037e-18	CAA57428		Acid beta-fructofuranosidase	0.09	P29000		Sustractive. Pollen specific
P1C187-PoL	Autoinhibited h+ atpase	9.60204e-15	AAV49159		ATPase 3, plasma membrane-type	1e-14	P20431		Sustractive. Pollen specific
P1C188-PoL	Alpha-expansin 3	2.09487e-48	XP_003520665		Expansin-A5	4e-42	Q38864		Non specific
P1C189-PoL	Protein	1.49983e-10	XP_002533096		Rhomboid-like protease 3	4e-13	Q6IUY1		Non specific
P1C190-PoL	Inositol or phosphatidylinositol	1.15724e-14	CBI32835		Unknown protein	0.8			Non specific
P1C191-PoL	Unknown [Populus trichocarpa]	0.0811921	ABK93930		Animal ATP-binding cassette sub-family F member 2	0.082	Q99LE6		Non specific
P1C192-PoL	Alpha-expansin 3	9.21766e-48	XP_003520665		Expansin-A5	3e-42	Q38864		Non specific
