# Supplementary material for: Identification and Functional Annotation of Genes Differentially Expressed in the Reproductive Tissues of the Olive Tree (Olea europaea L.) through the Generation of Subtractive Libraries
Source: Front Plant Sci. 2017 Sep 13;8:1576. doi: 10.3389/fpls.2017.01576 (PMC5601413; doi:10.3389/fpls.2017.01576)
Supplement: Supplementary file 7 [file Table7.XLSX]

## Sheet: Sheet1
Sample	BLAST NCBI DATABASE	(eValue (<E-04)	Accesion number		BLAST OLEAEST DATABASE	(eValue (<E-01)	Id Uniprot		Screening Results
P1C1-LPo					Unknown protein	0.0003			Sustractive. Leaf specific			Sequences without a significant similarity are boxed in orange
P1C2-LPo	At3g17930 meb5_15	8.19325e-39	XP_002278927		Unknown protein	6e-39			Sustractive. Leaf specific
P1C3-LPo									Sustractive. Leaf specific
P1C4-LPo	Wpp domain-associated	1.05337e-24	CBI31022		Pentatricopeptide repeat-containing protein At1g80150, mitochondrial	0.46	Q8GW57		Sustractive. Leaf specific
P1C5-LPo					Unknown protein	2e-05			Sustractive. Leaf specific
P1C6-LPo					Dehydrin Rab18/ Late embryogenesis abundant protein	1e-36	P30185/ P21298		Sustractive. Leaf specific
P1C7-LPo					60S ribosomal protein L19-3	1e-21	P49693		Sustractive. Leaf specific
P1C8-LPo	Photosystem ii d1 protein	5.10634e-95	ACQ91600		Photosystem Q(B) protein	1e-121	Q0ZJ40		Sustractive. Leaf specific
P1C9-LPo	Pentatricopeptide repeat-containing protein	2.69065e-46	XP_002509971		Animal WD repeat and FYVE domain-containing protein 3/ Beige protein homolog 1	0.22	Q6VNB8/ P25356		Sustractive. Leaf specific
P1C10-LPo									Sustractive. Leaf specific
P1C11-LPo	1-aminocyclopropane-1-carboxylic acid oxidase	5.39515e-44	CAH58646		1-aminocyclopropane-1-carboxylate oxidase 3	5e-46	Q08507		Sustractive. Leaf specific
P1C12-LPo	Rubisco activase	9.08516e-26	AAN15946		Ribulose bisphosphate carboxylase/oxygenase activase, chloroplastic	1e-39	P93431		Sustractive. Leaf specific
P1C13-LPo	Mitogen-activated protein kinase 3	9.41432e-85	ABY85198		Mitogen-activated protein kinase 3	6e-52	Q39023		Sustractive. Leaf specific
P1C14-LPo	Aconitate hydratase	4.05146e-82	ADP03093		Aconitate hydratase, cytoplasmic	1e-105	P49608		Non specific
P1C15-LPo					Unknown protein	0.0002			Non specific
P1C16-LPo					Unknown protein	2e-08			Non specific
P1C17-LPo	PREDICTED: uncharacterized protein LOC100819024 [Glycine max]	1.0437e-63	XP_003532186		Casein kinase I isoform delta-like	0.68	P42158		Sustractive. Leaf specific
P1C18-LPo	Plant-specific domain tigr01589 family protein	2.63655e-25	CBI28559		Allene oxide synthase 1, chloroplastic	0.55	Q7Y0C8		Sustractive. Leaf specific
P1C19-LPo	ATP synthase cf0 subunit iv	1.3482e-52	ADD31558		ATP synthase subunit a, chloroplastic/ 30S ribosomal protein S2, chloroplastic	3e-77	P30391/ P06355		Sustractive. Leaf specific
P1C20-LPo	Hypothetical chloroplast rf68	5.01428e-23	XP_003604154		Uncharacterized protein ycf68	2e-29	Q6ENQ5		Sustractive. Leaf specific
P1C21-LPo	Plastidic aldolase	9.12546e-49	AAV74407		Fructose-bisphosphate aldolase, chloroplastic	3e-81	Q40677		Sustractive. Leaf specific
P1C22-LPo	Glyceraldehyde-3-phosphate dehydrogenase	1.10646e-113	CCF55355		Glyceraldehyde-3-phosphate dehydrogenase A, chloroplastic	3e-79	P09672		Sustractive. Leaf specific
P1C23-LPo	Nitrate	6.70625e-20	ACN72639		Zinc finger protein JACKDAW	3e-70	Q700D2		Sustractive. Leaf specific
P1C24-LPo	Catalase	9.18199e-74	CAB56850		Nitrate transporter 1.1/ Catalase isozyme 3	7e-89	Q05085/ P49317		Sustractive. Leaf specific
P1C25-LPo	Probable fructose-bisphosphate aldolase chloroplastic-like	2.6463e-36	ABY84683		Fructose-bisphosphate aldolase, chloroplastic	5e-44	P16096		Sustractive. Leaf specific
P1C26-LPo	Predicted protein [Populus trichocarpa]	6.54662	XP_002314132		Unknown protein	1e-29			Sustractive. Leaf specific
P1C27-LPo	23s ribosomal rna	6.78205e-59	XP_003610225		Unknown protein	9e-42			Sustractive. Leaf specific
P1C28-LPo					Protein TAR1	0.002	Q6CQE5		Sustractive. Leaf specific
P1C29-LPo	Chloroplast sedoheptulose- -bisphosphatase	2.77331e-77	NP_001234585		Sedoheptulose-1,7-bisphosphatase, chloroplastic	8e-54	P46285		Sustractive. Leaf specific
P1C30-LPo	Isochorismatase hydrolase family protein	3.87764e-34	ADR83703		Unknown protein	0.14			Sustractive. Leaf specific
P1C31-LPo	NADP-dependent glyceraldehyde-3-phosphate dehydrogenase	5.24674e-80	P93338		NADP-dependent glyceraldehyde-3-phosphate dehydrogenase	2e-65	Q9SNX8		Sustractive. Leaf specific
P1C32-LPo	Bromodomain adjacent to zinc finger domain protein 2b	2.82761e-23	CBI26469		TIP41-like protein	0.51	Q6IRA8		Sustractive. Leaf specific
P1C33-LPo					Unknown protein	0.016			Non specific
P1C34-LPo	Light harvesting chlorophyll a b-binding protein	4.46279e-131	XP_002455901		Chlorophyll a-b binding protein 21, chloroplastic	1e-152	P27493		Sustractive. Leaf specific
P1C35-LPo	Photosystem ii d1 protein	3.38704e-93	ABL86554		Photosystem Q(B) protein	1e-119	Q0ZJ40		Sustractive. Leaf specific
P1C36-LPo	Sec14 cytosolic factor family protein	3.06115e-63	XP_002327362		Patellin-3	1e-56	Q56Z59		Sustractive. Leaf specific
P1C37-LPo	Ribulose- -bisphosphate carboxylase oxygenase large partial	9.36901e-67	AFI20590		Ribulose bisphosphate carboxylase large chain	1e-75	P61293		Sustractive. Leaf specific
P1C38-LPo									Sustractive. Leaf specific
P1C39-LPo	Sedoheptulose- -bisphosphatase	8.98632e-118	XP_002530415		Sedoheptulose-1,7-bisphosphatase, chloroplastic	3e-96	O20252		Sustractive. Leaf specific
P1C40-LPo	NADH-ubiquinone oxidoreductase b18 subunit	1.4474e-48	XP_002521886		NADH dehydrogenase [ubiquinone] 1 beta subcomplex subunit 7	1e-94	Q54V61		Sustractive. Leaf specific
P1C41-LPo	At4g12290 t4c9_130	1.51362e-82	XP_002509596		Primary amine oxidase	1e-125	Q8H1H9		Sustractive. Leaf specific
P1C42-LPo	Catalase	8.66177e-50	ABS72010		Nitrate transporter 1.1/ Catalase isozyme 3	2e-60	Q05085/ P49317		Sustractive. Leaf specific
P1C43-LPo	NADH dehydrogenase subunit 5	3.94102e-125	YP_004564051		NAD(P)H-quinone oxidoreductase subunit 5, chloroplastic	1e-58	Q9TLA3		Sustractive. Leaf specific
P1C44-LPo	Snf7 family protein	6.02318e-74	AAO59435		Charged multivesicular body protein 1b	1e-104	Q5E994		Sustractive. Leaf specific
P1C45-LPo	Unknown protein (chloroplast) [Nicotiana tabacum]	4.68168e-08	AAA84679		ATP synthase subunit a, chloroplastic	5e-79	P30391		Sustractive. Leaf specific
P1C46-LPo	Protein plastid transcriptionally active 16	1.33579e-108	XP_002282730		Uncharacterized protein At2g34460, chloroplastic	1e-05	Q8H124		Sustractive. Leaf specific
P1C47-LPo	TO109-12 [Taraxacum officinale]	9.56165e-08	ABA27072		Unknown protein	3e-12			Sustractive. Leaf specific
P1C48-LPo					Unknown protein	2e-12			Sustractive. Leaf specific
P1C49-LPo	Membrane protein	1.20009e-58	XP_002532004		Unknown protein	3e-60			Non specific
P1C50-LPo	Metallothionein-like protein	1.39855e-06	AAO92264		Metallothionein-like protein type 3	5e-37	Q96386		Non specific
P1C51-LPo	Abhydrolase domain-containing protein 4-like	1.69811e-118	CBI19801		Animal Abhydrolase domain-containing protein 4	1e-77	Q8VD66		Sustractive. Leaf specific
P1C52-LPo					Early light-induced protein, chloroplastic/ Desiccation stress protein DSP-22, chloroplastic	4e-20	P11432/ Q01931		Sustractive. Leaf specific
P1C53-LPo	Hop-interacting protein thi115	3.90618e-57	CBI32175		Unknown protein	2e-44			Sustractive. Leaf specific
P1C54-LPo	Heat shock protein 70	8.40848e-43	AAL85887		Probable mediator of RNA polymerase II transcription subunit 37e	1e-73	P22953		Sustractive. Leaf specific
P1C55-LPo	Abscisic acid insensitivity 1b	1.40832e-11	XP_002521368		Protein phosphatase 2C 7	9e-20	Q9LNP9		Sustractive. Leaf specific
P1C56-LPo					Unknown protein	0.018			Sustractive. Leaf specific
P1C57-LPo	Major facilitator protein	1.9651e-51	XP_002326206		Unknown protein	4e-24			Sustractive. Leaf specific
P1C58-LPo	Cytochrome f	7.30665e-36	ADD30925		Apocytochrome f	1e-81	Q06RB9		Sustractive. Leaf specific
P1C59-LPo	Dehydrin dhn3-like	0.0243986	AAP94627		Dehydrin Rab18/ Late embryogenesis abundant protein	3e-17	P30185/ P21298		Sustractive. Leaf specific
P1C60-LPo	Thylakoid membrane phosphoprotein 14 chloroplast	1.28745e-05	XP_002302615		Uncharacterized protein At4g01150, chloroplastic/ Thylakoid membrane phosphoprotein 14 kDa, chloroplastic	1e-76	O04616/ Q8LCA1		Sustractive. Leaf specific
P1C61-LPo					Unknown protein	0.004			Sustractive. Leaf specific
P1C62-LPo					Unknown protein	0.003			Sustractive. Leaf specific
P1C63-LPo					Unknown protein	0.0002			Sustractive. Leaf specific
P1C64-LPo	Photosystem ii p680 chlorophyll a apoprotein	1.4034e-30	ABG74835		Photosystem II CP47 chlorophyll apoprotein	2e-38	Q9BBQ8		Sustractive. Leaf specific
P1C65-LPo	Psi reaction center subunit ii	2.9759e-69	XP_002281825		Photosystem I reaction center subunit II, chloroplastic	1e-121	P12372		Sustractive. Leaf specific
P1C66-LPo					Probable mediator of RNA polymerase II transcription subunit 37c	7e-63	P22954		Sustractive. Leaf specific
P1C67-LPo	Light-harvesting complex i protein lhca2	9.10585e-33	XP_002299309		Chlorophyll a-b binding protein 7, chloroplastic	3e-55	P10708		Sustractive. Leaf specific
P1C68-LPo	Opc-8:0 ligase1	1.01388e-96	XP_002300662		4-coumarate--CoA ligase-like 5	7e-32	Q84P21		Sustractive. Leaf specific
P1C69-LPo	Protein	5.35343e-61	AAW66657		Thiamine thiazole synthase, chloroplastic	9e-62	O23787		Sustractive. Leaf specific
P1C70-LPo	Proliferation-associated protein 2g4-like	1.43132e-89	ABF66654		Animal Proliferation-associated protein 2G4	3e-70	P50580		Non specific
P1C71-LPo	L-lactate dehydrogenase	2.23074e-62	XP_003611291		ABC transporter B family member 4	0.59	O80725		Sustractive. Leaf specific
P1C72-LPo	Nitrate transporter	1.00993e-79	XP_002269340		Peptide transporter PTR2	1e-56	P46032		Sustractive. Leaf specific
P1C73-LPo	RNA polymerase sigma subunit 1	3.93267e-36	XP_002524027		Animal Acidic leucine-rich nuclear phosphoprotein 32 family member B/ E3 ubiquitin-protein ligase CIP8	0.6	Q92688/ Q9SPL2		Sustractive. Leaf specific
P1C74-LPo	33kda precursor protein of oxygen-evolving complex	1.71932e-49	AFH58000		Oxygen-evolving enhancer protein 1, chloroplastic	2e-63	Q40459		Sustractive. Leaf specific
P1C75-LPo	50s ribosomal protein l24	4.85495e-53	Q02764		50S ribosomal protein L24, chloroplastic	6e-65	Q02764		Sustractive. Leaf specific
P1C76-LPo					ATP synthase subunit a, chloroplastic	3e-93	P30391		Sustractive. Leaf specific
P1C77-LPo	ATPase epsilon subunit	4.39513e-79	YP_003359365		ATP synthase subunit beta, chloroplastic	1e-107	Q0ZJ13		Sustractive. Leaf specific
P1C78-LPo	Protein	2.1636e-44	ADE75625		Galactokinase	1e-104	Q9SEE5		Sustractive. Leaf specific
P1C79-LPo	Map3k protein kinase(mitogen-activated protein kinase)	1.62998e-32	XP_002263088		Mitogen-activated protein kinase kinase kinase 2	3e-11	Q9FZ36		Sustractive. Leaf specific
P1C80-LPo	Granule-bound starch synthase	1.56492e-94	CBH29615		Granule-bound starch synthase 1, chloroplastic/amyloplastic	1e-115	O82627		Sustractive. Leaf specific
P1C81-LPo	Beta-glucosidase g1	3.32896e-62	AAL93619		Beta-glucosidase, chloroplastic	3e-92	P49235		Non specific
P1C82-LPo	Tyrosine aminotransferase	4.06634e-58	ABC60050		Tyrosine aminotransferase	1e-55	Q58CZ9		Sustractive. Leaf specific
P1C83-LPo					FKBP-type peptidyl-prolyl cis-trans isomerase fkpA	8e-28	P45523		Sustractive. Leaf specific
P1C84-LPo					Unknown protein	0.022			Sustractive. Leaf specific
P1C85-LPo	Serine threonine-protein kinase chloroplastic-like	1.9967e-51	XP_003516854		Serine/threonine-protein kinase STN7, chloroplastic	2e-48	Q9S713		Non specific
P1C86-LPo	Proliferation-associated protein 2g4-like	1.8488e-91	ABF66654		Animal Proliferation-associated protein 2G4	5e-72	P50580		Non specific
P1C87-LPo	Germin-like protein	4.68473e-48	O04011		Auxin-binding protein ABP20	9e-61	O04011		Sustractive. Leaf specific
P1C88-LPo	chaperonin 20	0.000100545	AAM77651		20 kDa chaperonin, chloroplastic	4e-36	O65282		Non specific
P1C89-LPo	Ribulose- -bisphosphate carboxylase oxygenase activase	1.41781e-92	ABS72022		Ribulose bisphosphate carboxylase/oxygenase activase, chloroplastic	2e-92	P93431		Sustractive. Leaf specific
P1C90-LPo					Photosystem II D2 protein	4e-35	Q9BBT0		Non specific
P1C91-LPo									Non specific
P1C92-LPo	Protein	8.68077e-26	Q6RYA0		Polyneuridine-aldehyde esterase/ (S)-hydroxynitrile lyase/ Probable esterase PIR7A	1e-125	Q9SE93/ P52704/ Q0JG98		Non specific
P1C93-LPo	Protein binding	0.0136687	XP_002528790		Uncharacterized protein At5g08430	3e-05	Q9FT92		Non specific
P1C94-LPo					3-oxoacyl-[acyl-carrier-protein] reductase, chloroplastic	0.41	P28643		Non specific
P1C95-LPo	Nucleic acid binding	1.83555e-32	XP_002519549		Zinc finger protein JACKDAW	8e-59	Q700D2		Non specific
P1C96-LPo	Nucleic acid binding	6.14539e-13	XP_002282251		Zinc finger protein JACKDAW	8e-59	Q700D2		Non specific
P2C1-LPo					Unknown protein	0.005			Sustractive. Leaf specific
P2C2-LPo	Protein	5.21182e-20	CBI33056		UDP-glycosyltransferase 74E1	4e-37	P0C7P7		Sustractive. Leaf specific
P2C3-LPo	Cysteine proteinase aalp	4.21207e-71	BAA96501		Oryzain gamma chain/ Thiol protease aleurain/ Cysteine proteinase 3	1e-102	P25778/ P05167/ Q40143		Non specific
P2C4-LPo	Nascent polypeptide-associated complex subunit beta	6.07359e-55	ABE01085		Transcription factor BTF3 homolog 4	1e-64	Q5M8V0		Sustractive. Leaf specific
P2C5-LPo	Uvrb uvrc motif-containing protein	5.78865e-26	XP_002512121		Animal F-box only protein 21	6e-78	Q8VDH1		Non specific
P2C6-LPo	Structural maintenance of chromosomes 1	1.09865e-54	BAE99763		Structural maintenance of chromosomes protein 1	1e-17	O94383		Non specific
P2C7-LPo	Raffinose synthase protein	8.42133e-83	NP_198855		Probable galactinol--sucrose galactosyltransferase 1/ Stachyose synthase/ Alpha-galactosidase	8e-46	Q84VX0/ Q93XK2/ Q97U94		Sustractive. Leaf specific
P2C8-LPo	At3g17930 meb5_15	4.31896e-37	CBI15594		Bark storage protein A/ MTA/SAH nucleosidase	0.08	Q07469/ P67656		Sustractive. Leaf specific
P2C9-LPo					Aspartate--tRNA ligase	0.88	B0JNW9		Sustractive. Leaf specific
P2C10-LPo	Carboxyl-terminal peptidase protein	1.2875e-41	ACU24472		Unknown protein	6e-55			Sustractive. Leaf specific
P2C11-LPo									Non specific
P2C12-LPo									Sustractive. Leaf specific
P2C13-LPo	Metallothionein-like protein	4.20235e-18	AFK33631		Metallothionein-like protein type 3	5e-73	Q96386		Non specific
P2C14-LPo	Cytochrome b6f complex subunit	2.08179e-08	CAN82364		Uncharacterized TPR repeat-containing protein At1g05150	0.025	O23052		Non specific
P2C15-LPo	Cysteine proteinase rd21a	1.53861e-38	AAU81588		Low-temperature-induced cysteine proteinase/ Cysteine proteinase RD21a	4e-86	P20721/ P43297		Non specific
P2C16-LPo	Nitrate	6.4327e-77	XP_002270558		Peptide transporter PTR2	1e-31	P46032		Non specific
P2C17-LPo					Unknown protein	7e-06			Sustractive. Leaf specific
P2C18-LPo					Chloride channel protein CLC-c	0.23	Q96282		Non specific
P2C19-LPo	Catalase	2.11479e-42	ABS72010		Nitrate transporter 1.1/ Catalase isozyme 3	5e-62	Q05085/ P49317		Non specific
P2C20-LPo	Lipid transfer protein precursor	1.70114e-31	CCJ09772		Non-specific lipid-transfer protein	1,00E-102	P10976		Non specific
P2C21-LPo	NADH dehydrogenase subunit 4	2.77852e-46	BAC77562		NAD(P)H-quinone oxidoreductase chain 4, chloroplastic	2e-38	O03060		Sustractive. Leaf specific
P2C22-LPo	RNA-binding protein	9.72135e-47	XP_002323470		29 kDa ribonucleoprotein A, chloroplastic	1e-141	Q08935		Non specific
P2C23-LPo	Protein	1.01639e-42	XP_002284860		Protein TIFY 6B	1e-131	Q9LVI4		Non specific
P2C24-LPo	Photosystem i reaction center subunit v	2.71632e-45	AEC11064		Photosystem I reaction center subunit V, chloroplastic	4e-31	P12357		Non specific
P2C25-LPo					Aspartate--tRNA ligase	0.88	B0JNW9		Non specific
P2C26-LPo					Tubulin alpha chain	1e-27	Q38771		Non specific
P2C27-LPo	Post-illumination chlorophyll fluorescence increase protein	2.02348e-75	XP_002298209		Retrovirus-related Pol polyprotein from transposon TNT 1-94	0.98	P10978		Non specific
P2C28-LPo	Fructose-bisphosphate aldolase	1.46386e-87	XP_002519633		Fructose-bisphosphate aldolase, cytoplasmic isozyme	6e-79	O65735		Non specific
P2C29-LPo	Protein kinase-like protein	3.02557e-66	XP_003630515		Probable serine/threonine-protein kinase At4g35230	9e-55	Q944A7		Non specific
P2C30-LPo	Glucose-6-phosphate dehydrogenase	3.61264e-75	XP_002530221		Glucose-6-phosphate 1-dehydrogenase, chloroplastic	6e-40	Q43793		Non specific
P2C31-LPo					Unknown protein	4e-52			Non specific
P2C32-LPo	4-diphosphocytidyl-2-c-methyl-d-erythritol kinase	9.36606e-51	AAM53955		4-diphosphocytidyl-2-C-methyl-D-erythritol kinase, chloroplastic	8e-71	P56848		Non specific
P2C33-LPo	At3g29240 mxo21_9	7.43346e-75	XP_002284130		UPF0301 protein Cag_1601	9e-09	Q3AQ69		Non specific
P2C34-LPo	NADP-dependent glyceraldehyde-3-phosphate dehydrogenase	3.23239e-81	P93338		NADP-dependent glyceraldehyde-3-phosphate dehydrogenase	1e-66	Q9SNX8		Sustractive. Leaf specific
P2C35-LPo					Unknown protein	0.017			Non specific
P2C36-LPo									Sustractive. Leaf specific
P2C37-LPo	Ubiquitin-like protein	5.40816e-24	S42643		Ubiquitin	1e-50	P69326		Sustractive. Leaf specific
P2C38-LPo	Jumonji domain protein	2.79186e-48	XP_002276932		Fructose-bisphosphate aldolase, chloroplastic	5e-40	Q40677		Sustractive. Leaf specific
P2C39-LPo	Light-harvesting complex i chlorophyll a b binding protein 3	3.7965e-76	AAF44703		Chlorophyll a-b binding protein 8, chloroplastic	1e-111	P27522		Sustractive. Leaf specific
P2C40-LPo	Psbp domain-containing protein chloroplastic-like	1.23251e-60	XP_002526176		PsbP domain-containing protein 4, chloroplastic	7e-20	O49292		Non specific
P2C41-LPo	Protein	5.53945e-56	XP_002272012		Pollen-specific protein SF21/ NDRG-like protein	0.65	O23969/ Q55BX3		Non specific
P2C42-LPo	Ubiquitin carboxyl-terminal hydrolase 23-like	7.72584e-12	XP_003634989		Unknown protein	0.0002			Non specific
P2C43-LPo	Monooxygenase 1	1.53382e-67	XP_002515156		Zeaxanthin epoxidase, chloroplastic/ 3-(3-hydroxy-phenyl)propionate/3-hydroxycinnamic acid hydroxylase	4e-60	O81360/ A0R1T4		Non specific
P2C44-LPo	Btb poz domain-containing protein at1g63850-like	0.00917621	CAN67577		Unknown protein	1e-42			Non specific
P2C45-LPo									Non specific
P2C46-LPo	Tatc-like protein	5.01068e-18	XP_003567744		Sec-independent protein translocase protein TatC	4e-47	P54086		Sustractive. Leaf specific
P2C47-LPo	Metallothionein-like protein	0.0250823	AFK34468		Metallothionein-like protein type 3	5e-53	Q96386		Non specific
P2C48-LPo	Aspartic proteinase nepenthesin-2	6.91443e-87	XP_002525244		Aspartic proteinase nepenthesin-2	5e-66	Q766C2		Non specific
P2C49-LPo	Protein	4.62776e-09	XP_003631872		Probable salt tolerance-like protein At1g78600	3e-21	Q9SYM2		Sustractive. Leaf specific
P2C50-LPo	Lipid transfer protein precursor	2.47962e-33	CCJ09772		Non-specific lipid-transfer protein	1e-104	P10976		Sustractive. Leaf specific
P2C51-LPo					Cytochrome b-c1 complex subunit 8	0.038	P46269		Non specific
P2C52-LPo	Uvrb uvrc motif-containing protein	4.09514e-102	XP_002512121		Animal F-box only protein 21	5e-44	Q8VDH1		Non specific
P2C53-LPo	Glycolate oxidase	1.41841e-109	ACD93720		Peroxisomal (S)-2-hydroxy-acid oxidase	6e-92	P05414		Non specific
P2C54-LPo	Tyrosine aminotransferase	4.05082e-58	ABC60050		Tyrosine aminotransferase	1e-55	Q58CZ9		Sustractive. Leaf specific
P2C55-LPo	Cytochrome c biogenesis protein transmembrane region containing expressed	3.91199e-26	XP_002284546		Putative cytochrome c-type biogenesis protein dbsD-like	2e-13	P51364		Sustractive. Leaf specific
P2C56-LPo	Hydroxypyruvate reductase	1.01863e-123	ABD97861		Glycerate dehydrogenase/ Glyoxylate reductase	1e-143	P13443/ Q9C4M5		Sustractive. Leaf specific
P2C57-LPo	Multi-copper oxidase type i family protein	3.57314e-87	XP_002315892		Spore coat protein A/ Multicopper oxidase mco	1e-49	P07788 / Q69HT9		Non specific
P2C58-LPo	Secologanin synthase-like	9.41191e-32	XP_003543171		Secologanin synthase/ Cytochrome P450 3A24	2e-92	Q05047/ Q29496		Non specific
P2C59-LPo	Arid bright dna-binding domain-containing protein	2.93734e-120	XP_002324130		Cellulose synthase A catalytic subunit 7 [UDP-forming]	0.25	Q9SWW6		Non specific
P2C60-LPo	Chloroplast elongation factor (ef- )	2.9033e-36	XP_002298064		Elongation factor Tu, chloroplastic	1e-57	P68158		Sustractive. Leaf specific
P2C61-LPo	Photosystem ii 10 kda polypeptide	8.92028e-38	CAA27989		Photosystem II 10 kDa polypeptide, chloroplastic	1e-83	Q40519		Non specific
P2C62-LPo	Cyclin-dependent kinase e-1	1.25641e-98	XP_003532085		Cyclin-dependent kinase E-1	4e-28	Q336M2		Non specific
P2C63-LPo	Predicted protein [Arabidopsis lyrata subsp. lyrata]	6.13857e-25	XP_002863305		Fatty acid desaturase 2	0.72	Q9DEX7		Non specific
P2C64-LPo	UDP-glycosyltransferase 91a1-like	4.09191e-59	XP_002270260		Zeatin O-xylosyltransferase/ UDP-glycosyltransferase 72B1	3e-61	P56725/ Q9M156		Non specific
P2C65-LPo	Chaperone protein dnaj	1.49194e-103	CAN60541		Chaperone protein DnaJ	5e-08	Q253T6		Non specific
P2C66-LPo	At3g32930-like protein	1.22447e-28	XP_002530870		Unknown protein	4e-42			Non specific
P2C67-LPo					Unknown protein	0.007			Non specific
P2C68-LPo	Magnesium-protoporphyrin ix monomethyl ester	1.16134e-123	Q945B7		Magnesium-protoporphyrin IX monomethyl ester [oxidative] cyclase, chloroplastic	3e-55	Q5EFU4		Non specific
P2C69-LPo	NADP-dependent malic enzyme	3.45013e-85	CAB66003		NADP-dependent malic enzyme	1e-105	P51615		Sustractive. Leaf specific
P2C70-LPo					Integumentary mucin A.1/ Cell wall protein DAN4	9e-05	P10667/ P47179		Sustractive. Leaf specific
P2C71-LPo	Geraniol synthase	4.13268e-140	AFI47926		1,8-cineole synthase, chloroplastic/ Casbene synthase, chloroplastic	1e-143	O81191/ P59287		Sustractive. Leaf specific
P2C72-LPo	Ferredoxin--nadp leaf chloroplastic-like isoform 1	4.78956e-72	XP_002533800		Ferredoxin--NADP reductase, chloroplastic	7e-43	P00455		Sustractive. Leaf specific
P2C73-LPo	Photosystem ii 23 kda polypeptide	3.26267e-84	AFK44592		Oxygen-evolving enhancer protein 2, chloroplastic	1e-105	P93566		Sustractive. Leaf specific
P2C74-LPo	NADH dehydrogenase 19 kda subunit	3.56465e-99	YP_003359362		NAD(P)H-quinone oxidoreductase subunit J, chloroplastic	2e-69	P12201		Sustractive. Leaf specific
P2C75-LPo	Protein prenyltransferase	0.0015019	XP_002319657						Non specific
P2C76-LPo	Domain-containing protein	2.80084e-80	BAC76005		GTP pyrophosphokinase	2e-21	Q8CS97		Non specific
P2C77-LPo					Unknown protein	1e-57			Non specific
P2C78-LPo	Polyol transporter	7.67189e-51	AAZ80876		Polyol transporter 5	1e-78	Q8VZ80		Non specific
P2C79-LPo	Degp1	1.23993e-90	XP_003618288		Protease Do-like 1, chloroplastic	3e-78	O22609		Non specific
P2C80-LPo	Plastocyanin chloroplast	3.55326e-24	XP_002510603		Plastocyanin, chloroplastic	2e-90	P17340		Non specific
P2C81-LPo					Unknown protein	0.017			Non specific
P2C82-LPo					Unknown protein	0.025			Non specific
P2C83-LPo	Auxin-responsive protein	3.40723e-77	XP_003632858		Auxin-responsive protein IAA9	7e-34	Q38827		Non specific
P2C84-LPo	Two-component response regulator arr	1.57063e-09	CAN79855		Unknown protein	1e-47			Sustractive. Leaf specific
P2C85-LPo	Ribulose bisphosphate carboxylase oxygenase activase chloroplast	8.23629e-32	XP_002532996		Ribulose bisphosphate carboxylase/oxygenase activase, chloroplastic	9,00E-40	P93431		Sustractive. Leaf specific
P2C86-LPo	Monooxygenase 1	9.12049e-11	XP_002868183		Unknown protein	3e-31			Sustractive. Leaf specific
P2C87-LPo					Animal E3 ubiquitin-protein ligase MARCH3	0.25	Q5XIE5		Sustractive. Leaf specific
P2C88-LPo	Chlorophyll a b-binding protein cp29	4.28896e-129	ABG73415		Chlorophyll a-b binding protein CP29.1, chloroplastic	1e-134	Q07473		Sustractive. Leaf specific
P2C89-LPo					Unknown protein	0.066			Sustractive. Leaf specific
P2C90-LPo	Peptide methionine sulfoxide reductase	1.65649e-55	AEN03271		Peptide methionine sulfoxide reductase	9e-28	P54153		Sustractive. Leaf specific
P2C91-LPo	5 -methylthioadenosine s-adenosylhomocysteine nucleosidase	1.09086e-35	CCJ09766		MTA/SAH nucleosidase/ Bark storage protein B	3e-86	P67656/ Q09117		Non specific
P2C92-LPo	Photosystem ii protein d1	1.63076e-82	ADG84787		Photosystem Q(B) protein	1e-128	Q0ZJ40		Non specific
P2C93-LPo	Ribulose- -bisphosphate carboxylase oxygenase large subunit	2.90894e-43	AFQ22718		Ribulose bisphosphate carboxylase large chain	5e-49	P61293		Sustractive. Leaf specific
P2C94-LPo					FKBP-type peptidyl-prolyl cis-trans isomerase fkpA	8e-28	P45523		Non specific
P2C95-LPo	Glyceraldehyde-3-phosphate dehydrogenase	5.14733e-103	CCF55355		Glyceraldehyde-3-phosphate dehydrogenase A, chloroplastic	3e-79	P09672		Non specific
P2C96-LPo	Dead-box atp-dependent rna helicase	1.21399e-22	XP_003606390		DEAD-box ATP-dependent RNA helicase 17/ Probable ATP-dependent RNA helicase DDX31	2e-30	Q0DLB9/ Q9H8H2		Non specific
