# Supplementary material for: Identification and Functional Annotation of Genes Differentially Expressed in the Reproductive Tissues of the Olive Tree (Olea europaea L.) through the Generation of Subtractive Libraries
Source: Front Plant Sci. 2017 Sep 13;8:1576. doi: 10.3389/fpls.2017.01576 (PMC5601413; doi:10.3389/fpls.2017.01576)
Supplement: Supplementary file 8 [file Table8.XLSX]

## Sheet: Hoja1
Po(P)		FULL-LengtherNext ANNOTATION			REPROLIVE		CRUZ		BLAST WITH Roche/454 READS
Sample	Fastq_id	Description	e-value	Subject_id	pollen_transc_id	pollen_description	cruz_transc_id	cruz_description	pollen_mature	pollen_germ_1h	pollen_germ_5h30min	pistil_stage2	pistil_stage3	pistil_stage4	leaf			Rejected by SeqTrimNext
P1C1-PoP	1_001_A01_2011-12-12.ab1	-	-	-	po11_olive_021777	-	OE6A075553T1	Pyridoxal kinase	YES	YES	YES	-	-	YES	-
P1C2-PoP	2_002_A02_2011-12-12.ab1	Expansin-A2 Arabidopsis thaliana (Mouse-ear cress)	7e-11	Q38866	po11_olive_005759	Expansin-A11 Oryza sativa subsp. japonica (Rice)	OE6A098852T1	Expansin-A32	YES	YES	YES	-	-	-	-
P1C3-PoP	3_001_A03_2011-12-12.ab1	-	-	-	po11_olive_007555	Pectinesterase 4 Arabidopsis thaliana (Mouse-ear cress)	OE6A089469T1	Pectinesterase 4	YES	YES	YES	-	YES	YES	-
P1C4-PoP	4_002_A04_2011-12-12.ab1	L-ascorbate oxidase homolog Nicotiana tabacum (Common tobacco)	0	P29162	po11_olive_000861	L-ascorbate oxidase homolog Nicotiana tabacum (Common tobacco)	OE6A066907T1	L-ascorbate oxidase homolog	YES	YES	YES	YES	YES	YES	-
P1C5-PoP	5_001_A05_2011-12-12.ab1	Olee1-like protein Betula pendula (European white birch) (Betula verrucosa)	3e-09	O49813	po11_olive_008281	Allergen Fra e 1 Fraxinus excelsior (European ash)	OE6A067324T1	Major pollen allergen Ole e 1	YES	YES	YES	-	-	-	-
P1C6-PoP	6_002_A06_2011-12-12.ab1	-	-	-	po11_olive_001055	Pectinesterase Erythranthe guttata (Yellow monkey flower) (Mimulus guttatus)	OE6A071540T1	Pectinesterase 4	YES	YES	YES	-	-	YES	-
P1C7-PoP	7_001_A07_2011-12-12.ab1	Uncharacterized protein Daucus carota subsp. sativus.	0.006	A0A161YDQ9	po11_olive_016743	Uncharacterized protein Theobroma cacao (Cacao) (Cocoa)	OE6A075553T1	Pyridoxal kinase	YES	YES	YES	-	-	-	-
P1C8-PoP	8_002_A08_2011-12-12.ab1	-	-	-	-	-	-	-	-	-	-	-	-	-	-
P1C9-PoP	9_001_A09_2011-12-13.ab1	-	-	-	-	-	-	-	-	-	-	-	-	-	-
P1C10-PoP	10_002_A10_2011-12-13.ab1	Anther-specific protein LAT52 Solanum lycopersicum (Tomato) (Lycopersicon esculentum)	9e-12	P13447	po11_olive_018165	Allergen Fra e 1 Fraxinus excelsior (European ash)	OE6A114289T1	Major pollen allergen Lig v 1	-	-	-	-	-	-	-
P1C11-PoP	11_001_A11_2011-12-13.ab1	-	-	-	-	-	-	-	-	-	-	-	-	-	-
P1C12-PoP	12_002_A12_2011-12-13.ab1	Polyol transporter 5 Arabidopsis thaliana (Mouse-ear cress)	2e-50	Q8VZ80	po11_olive_004755	Polyol transporter 5 Arabidopsis thaliana (Mouse-ear cress)	OE6A089393T1	Polyol transporter 5	YES	YES	YES	-	-	YES	-
P1C13-PoP	13_003_B01_2011-12-12.ab1	-	-	-	po11_olive_017940_split_0	Pectinesterase/pectinesterase inhibitor PPE8B Prunus persica (Peach) (Amygdalus persica)	OE6A089469T1	Pectinesterase 4	YES	YES	YES	-	YES	YES	-
P1C14-PoP	14_004_B02_2011-12-12.ab1	L-ascorbate oxidase homolog Nicotiana tabacum (Common tobacco)	4e-113	P29162	po11_olive_000239	L-ascorbate oxidase homolog Nicotiana tabacum (Common tobacco)	OE6A036630T1	L-ascorbate oxidase homolog	YES	YES	YES	-	-	YES	-
P1C15-PoP	15_003_B03_2011-12-12.ab1	-	-	-	-	-	-	-	-	-	-	-	-	-	-
P1C16-PoP	16_004_B04_2011-12-12.ab1	Putative pectinesterase/pectinesterase inhibitor 45 Arabidopsis thaliana (Mouse-ear cress)	1e-53	Q9SMY6	po11_olive_000076	-	OE6A089469T1	Pectinesterase 4	YES	YES	YES	-	YES	YES	-
P1C17-PoP	17_003_B05_2011-12-12.ab1	Putative uncharacterized protein Zea mays (Maize)	2e-06	B6SN05	po11_olive_002260	Putative uncharacterized protein Zea mays (Maize)	-	-	-	-	-	-	-	-	-
P1C18-PoP	18_004_B06_2011-12-12.ab1	-	-	-	po11_olive_017940_split_0	Pectinesterase/pectinesterase inhibitor PPE8B Prunus persica (Peach) (Amygdalus persica)	OE6A089469T1	Pectinesterase 4	YES	YES	YES	-	YES	YES	-
P1C19-PoP	19_003_B07_2011-12-12.ab1	-	-	-	-	-	-	-	-	-	-	-	-	-	-
P1C20-PoP	20_004_B08_2011-12-12.ab1	-	-	-	-	-	-	-	-	-	-	-	-	-	-
P1C21-PoP	21_003_B09_2011-12-13.ab1	-	-	-	po11_olive_006626	-	OE6A009288T1	Exopolygalacturonase	-	-	-	-	-	-	-
P1C22-PoP	22_004_B10_2011-12-13.ab1	-	-	-	po11_olive_003029	Uncharacterized protein Jatropha curcas (Barbados nut)	OE6A031186T2	Uncharacterized protein At2g34160	YES	YES	YES	-	YES	YES	-
P1C23-PoP	23_003_B11_2011-12-13.ab1	-	-	-	po11_olive_003531	Uncharacterized protein Solanum tuberosum (Potato)	OE6A063612T4	Protein BREAST CANCER SUSCEPTIBILITY 1 homolog	-	YES	YES	-	-	-	-
P1C24-PoP	24_004_B12_2011-12-13.ab1	-	-	-	po11_olive_003993	Coffea canephora DH200=94 genomic scaffold, scaffold_91 Coffea canephora (Robusta coffee)	OE6A084908T3	Pentatricopeptide repeat-containing protein At4g21065	YES	YES	YES	-	YES	-	-
P1C25-PoP	25_005_C01_2011-12-12.ab1	-	-	-	po11_olive_005211_split_1	Zinc finger protein 1 Triticum aestivum (Wheat)	OE6A088907T1	Zinc finger protein ZAT5	-	YES	YES	-	-	-	-
P1C26-PoP	26_006_C02_2011-12-12.ab1	-	-	-	-	-	-	-	-	-	-	-	-	-	-
P1C27-PoP	27_005_C03_2011-12-12.ab1	-	-	-	-	-	-	-	-	-	-	-	-	-	-
P1C28-PoP	28_006_C04_2011-12-12.ab1	-	-	-	-	-	-	-	-	-	-	-	-	-	-
P1C29-PoP	29_005_C05_2011-12-12.ab1	-	-	-	-	-	-	-	-	-	-	-	-	-	-
P1C30-PoP	30_006_C06_2011-12-12.ab1	-	-	-	po11_olive_001781	Cytochrome b561 and DOMON domain-containing protein At3g25290 Arabidopsis thaliana (Mouse-ear cress)	OE6A014721T2	Auxin-induced in root cultures protein 12	YES	YES	YES	-	-	-	-
P1C31-PoP	31_005_C07_2011-12-12.ab1	Putative ovule protein Solanum chacoense (Chaco potato)	2e-57	A0A0V0IH68	po11_olive_002057	-	OE6A088096T1	GDSL esterase/lipase At3g48460	YES	YES	YES	-	YES	YES	-
P1C32-PoP	32_006_C08_2011-12-12.ab1	LIM domain-containing protein PLIM2c Arabidopsis thaliana (Mouse-ear cress)	2e-84	Q500W4	po11_olive_006175	Coffea canephora DH200=94 genomic scaffold, scaffold_35 Coffea canephora (Robusta coffee)	OE6A027213T1	Pollen-specific protein SF3	-	-	YES	-	-	-	-
P1C33-PoP	33_005_C09_2011-12-13.ab1	Uncharacterized protein Gossypium raimondii (New World cotton)	6e-57	A0A0D2TVK1	po11_olive_004481	-	OE6A019012T2	Kynurenine formamidase	YES	YES	YES	-	YES	-	-
P1C34-PoP	34_006_C10_2011-12-13.ab1	-	-	-	-	-	-	-	-	-	-	-	-	-	-
P1C35-PoP	35_005_C11_2011-12-13.ab1	-	-	-	po11_olive_018369	-	OE6A019776T1	RNA polymerase-associated protein CTR9 homolog	YES	YES	YES	-	YES	YES	-
P1C36-PoP	36_006_C12_2011-12-13.ab1	-	-	-	po11_olive_000573_split_0	Coffea canephora DH200=94 genomic scaffold, scaffold_81 Coffea canephora (Robusta coffee)	OE6A024275T3	ATPase 8, plasma membrane-type	-	-	-	-	-	-	-
P1C37-PoP	37_007_D01_2011-12-12.ab1	-	-	-	-	-	-	-	-	-	-	-	-	-	-
P1C38-PoP	38_008_D02_2011-12-12.ab1	-	-	-	-	-	-	-	-	-	-	-	-	-	-
P1C39-PoP	39_007_D03_2011-12-12.ab1	-	-	-	po11_olive_001175	Coffea canephora DH200=94 genomic scaffold, scaffold_22 Coffea canephora (Robusta coffee)	OE6A104581T1	Nuclear factor related to kappa-B-binding protein	-	-	YES	-	-	-	-
P1C40-PoP	40_008_D04_2011-12-12.ab1	-	-	-	po11_olive_012341	-	-	-	YES	YES	YES	-	YES	-	-
P1C41-PoP	41_007_D05_2011-12-12.ab1	Uncharacterized protein Solanum tuberosum (Potato)	9e-23	M1BVR2	po11_olive_003551	Pollen-specific protein SF21 Helianthus annuus (Common sunflower)	OE6A053176T1	Pollen-specific protein SF21	YES	YES	YES	YES	-	-	-
P1C42-PoP	42_008_D06_2011-12-12.ab1	Uncharacterized protein Coffea canephora (Robusta coffee)	0	A0A068UPR2	po11_olive_000423	Glycerophosphodiester phosphodiesterase GDPDL7 Arabidopsis thaliana (Mouse-ear cress)	OE6A104488T2	Probable glycerophosphoryl diester phosphodiesterase 2	YES	YES	YES	-	-	-	-
P1C43-PoP	43_007_D07_2011-12-12.ab1	Uncharacterized protein Coffea canephora (Robusta coffee)	0	A0A068UPR2	po11_olive_000423	Glycerophosphodiester phosphodiesterase GDPDL7 Arabidopsis thaliana (Mouse-ear cress)	OE6A104488T2	Probable glycerophosphoryl diester phosphodiesterase 2	YES	YES	YES	-	-	-	-
P1C44-PoP	44_008_D08_2011-12-12.ab1	-	-	-	po11_olive_001011	Putative pectinesterase/pectinesterase inhibitor 28 Arabidopsis thaliana (Mouse-ear cress)	OE6A035393T1	Putative pectinesterase/pectinesterase inhibitor 28	YES	YES	YES	-	-	YES	-
P1C45-PoP	45_007_D09_2011-12-13.ab1	2 of Vacuolar protein sorting-associated protein 32 homolog 2 Arabidopsis thaliana GN=VPS32.2	2e-05	Q9SZE4-2	po11_olive_006277	Vacuolar protein sorting-associated protein 32 homolog 1 Arabidopsis thaliana (Mouse-ear cress)	OE6A036980T1	Vacuolar protein sorting-associated protein 32 homolog 2	-	YES	-	-	-	-	-
P1C46-PoP	46_008_D10_2011-12-13.ab1	-	-	-	po11_olive_001875	Putative uncharacterized protein Vitis vinifera (Grape)	OE6A093803T1	Protein ASPARTIC PROTEASE IN GUARD CELL 1	YES	YES	YES	-	YES	YES	-
P1C47-PoP	47_007_D11_2011-12-13.ab1	-	-	-	po11_olive_000889	Protein NRT1/ PTR FAMILY 6.2 Arabidopsis thaliana (Mouse-ear cress)	OE6A094934T1	Protein NRT1/ PTR FAMILY 6.2	YES	YES	YES	YES	-	-	YES
P1C48-PoP	48_008_D12_2011-12-13.ab1	Anther-specific protein LAT52 Solanum lycopersicum (Tomato) (Lycopersicon esculentum)	1e-11	P13447	po11_olive_018165	Allergen Fra e 1 Fraxinus excelsior (European ash)	OE6A114289T1	Major pollen allergen Lig v 1	-	-	-	-	-	-	-
P1C49-PoP	49_009_E01_2011-12-12.ab1	-	-	-	-	-	-	-	-	-	-	-	-	-	-
P1C50-PoP	50_010_E02_2011-12-12.ab1	Pollen-specific protein C13 Zea mays (Maize)	1e-08	P33050	po11_olive_008281	Allergen Fra e 1 Fraxinus excelsior (European ash)	OE6A067324T1	Major pollen allergen Ole e 1	YES	YES	YES	-	-	YES	-
P1C51-PoP	51_009_E03_2011-12-12.ab1	Auxin-responsive protein SAUR36 Arabidopsis thaliana (Mouse-ear cress)	6e-34	O22150	po11_olive_010761	Auxin-induced protein X15 Glycine max (Soybean) (Glycine hispida)	OE6A075826T1	Auxin-induced protein X10A	-	-	-	-	-	-	-
P1C52-PoP	52_010_E04_2011-12-12.ab1	-	-	-	po11_olive_005759	Expansin-A11 Oryza sativa subsp. japonica (Rice)	OE6A098852T1	Expansin-A32	-	-	-	-	-	-	-
P1C53-PoP	53_009_E05_2011-12-12.ab1	-	-	-	po11_olive_012679	-	-	-	YES	YES	YES	-	YES	YES	-
P1C54-PoP	54_010_E06_2011-12-12.ab1	-	-	-	po11_olive_008219	Phosphatidylinositol/phosphatidylcholine transfer protein SFH3 Arabidopsis thaliana (Mouse-ear cress)	OE6A004884T1	Kynurenine formamidase	-	-	YES	-	-	-	-
P1C55-PoP	55_009_E07_2011-12-12.ab1	-	-	-	po11_olive_000119_split_0	Glucan endo-1,3-beta-glucosidase 8 Arabidopsis thaliana (Mouse-ear cress)	OE6A059392T1	Glucan endo-1,3-beta-glucosidase 8	YES	YES	YES	-	-	-	-
P1C56-PoP	56_010_E08_2011-12-12.ab1	-	-	-	-	-	-	-	-	-	-	-	-	-	-
P1C57-PoP	57_009_E09_2011-12-13.ab1	-	-	-	po11_olive_000737	Uncharacterized protein Erythranthe guttata (Yellow monkey flower) (Mimulus guttatus)	OE6A077336T3	Nuclear-interacting partner of ALK	-	-	-	-	-	-	-
P1C58-PoP	58_010_E10_2011-12-13.ab1	-	-	-	po11_olive_000445	Subtilisin-like protease Arabidopsis thaliana (Mouse-ear cress)	OE6A063053T2	Subtilisin-like protease	YES	YES	YES	YES	YES	YES	YES
P1C59-PoP	59_009_E11_2011-12-13.ab1	Putative uncharacterized protein Vitis vinifera (Grape)	8e-51	A5BTS4	po11_olive_003097	Putative uncharacterized protein Vitis vinifera (Grape)	-	-	YES	YES	YES	-	-	-	-
P1C60-PoP	60_010_E12_2011-12-13.ab1	Uncharacterized protein Erythranthe guttata (Yellow monkey flower) (Mimulus guttatus)	8e-72	A0A022RXQ1	po11_olive_012505	Uncharacterized protein Erythranthe guttata (Yellow monkey flower) (Mimulus guttatus)	OE6A007815T1	Serine/threonine-protein kinase-like protein ACR4	-	YES	YES	-	-	-	-
P1C61-PoP	61_011_F01_2011-12-12.ab1	-	-	-	-	-	-	-	-	-	-	-	-	-	-
P1C62-PoP	62_012_F02_2011-12-12.ab1	Uncharacterized protein Erythranthe guttata (Yellow monkey flower) (Mimulus guttatus)	6e-40	A0A022RJP0	po11_olive_014490	Probable inactive receptor kinase At5g67200 Arabidopsis thaliana (Mouse-ear cress)	OE6A080815T1	F-box protein SKIP14	YES	YES	YES	-	-	-	-
P1C63-PoP	63_011_F03_2011-12-12.ab1	-	-	-	po11_olive_000239	L-ascorbate oxidase homolog Nicotiana tabacum (Common tobacco)	OE6A036630T1	L-ascorbate oxidase homolog	YES	YES	YES	YES	YES	YES	-
P1C64-PoP	64_012_F04_2011-12-12.ab1	-	-	-	-	-	-	-	-	-	-	-	-	-	-
P1C65-PoP	65_011_F05_2011-12-12.ab1	Anther-specific protein LAT52 Solanum lycopersicum (Tomato) (Lycopersicon esculentum)	9e-09	P13447	po11_olive_000817	Anther-specific protein LAT52 Solanum lycopersicum (Tomato) (Lycopersicon esculentum)	OE6A030050T1	Anther-specific protein LAT52	YES	YES	YES	YES	YES	YES	-
P1C66-PoP	66_012_F06_2011-12-12.ab1	-	-	-	po11_olive_001781	Cytochrome b561 and DOMON domain-containing protein At3g25290 Arabidopsis thaliana (Mouse-ear cress)	OE6A014721T2	Auxin-induced in root cultures protein 12	YES	YES	YES	-	-	-	-
P1C67-PoP	67_011_F07_2011-12-12.ab1	Putative pectinesterase/pectinesterase inhibitor 38 Arabidopsis thaliana (Mouse-ear cress)	1e-42	O81320	po11_olive_001055	Pectinesterase Erythranthe guttata (Yellow monkey flower) (Mimulus guttatus)	OE6A071540T1	Pectinesterase 4	YES	YES	YES	-	-	-	-
P1C68-PoP	68_012_F08_2011-12-12.ab1	L-ascorbate oxidase homolog Nicotiana tabacum (Common tobacco)	2e-121	P29162	po11_olive_000239	L-ascorbate oxidase homolog Nicotiana tabacum (Common tobacco)	OE6A036630T1	L-ascorbate oxidase homolog	YES	-	-	-	-	-	-
P1C69-PoP	69_011_F09_2011-12-13.ab1	Uncharacterized protein Daucus carota subsp. sativus.	1e-19	A0A175YQZ0	po11_olive_011195	Uncharacterized protein Erythranthe guttata (Yellow monkey flower) (Mimulus guttatus)	OE6A033582T1	ATP-dependent Clp protease proteolytic subunit 4, chloroplastic	YES	YES	YES	-	YES	YES	-
P1C70-PoP	70_012_F10_2011-12-13.ab1	Tubulin alpha-1 chain Eleusine indica (Goosegrass) (Cynosurus indicus)	2e-109	O22347	po11_olive_001961	Tubulin alpha-1 chain Pisum sativum (Garden pea)	OE6A073576T1	Tubulin alpha-1 chain	YES	YES	YES	YES	YES	-	YES
P1C71-PoP	71_011_F11_2011-12-13.ab1	-	-	-	po11_olive_001875	Putative uncharacterized protein Vitis vinifera (Grape)	OE6A093803T1	Protein ASPARTIC PROTEASE IN GUARD CELL 1	YES	YES	YES	-	YES	YES	-
P1C72-PoP	72_012_F12_2011-12-13.ab1	-	-	-	po11_olive_000027_split_1	ATPase 8, plasma membrane-type Arabidopsis thaliana (Mouse-ear cress)	OE6A024275T3	ATPase 8, plasma membrane-type	YES	YES	YES	-	-	YES	-
P1C73-PoP	73_013_G01_2011-12-12.ab1	UDP-glucuronate 4-epimerase 1 Arabidopsis thaliana (Mouse-ear cress)	2e-121	Q9M0B6	po11_olive_004655	UDP-glucuronate 4-epimerase 1 Arabidopsis thaliana (Mouse-ear cress)	OE6A058988T1	UDP-glucuronate 4-epimerase 1	YES	YES	YES	-	-	-	-
P1C74-PoP	74_014_G02_2011-12-12.ab1	Tubulin alpha-2 chain Oryza sativa subsp. japonica (Rice)	7e-111	Q53M52	po11_olive_001961	Tubulin alpha-1 chain Pisum sativum (Garden pea)	OE6A073576T1	Tubulin alpha-1 chain	YES	YES	YES	YES	YES	-	YES
P1C75-PoP	75_013_G03_2011-12-12.ab1	-	-	-	po11_olive_000299	Cation/H(+) antiporter 15 Arabidopsis thaliana (Mouse-ear cress)	OE6A034346T2	Cation/H(+) antiporter 15	-	-	YES	-	-	-	-
P1C76-PoP	76_014_G04_2011-12-12.ab1	Aldehyde oxidase GLOX1 Arabidopsis thaliana (Mouse-ear cress)	5e-50	Q9FYG4	po11_olive_000519	Uncharacterized protein Solanum tuberosum (Potato)	OE6A116313T1	Galactose oxidase	YES	YES	YES	-	-	-	-
P1C77-PoP	77_013_G05_2011-12-12.ab1	Putative pectinesterase/pectinesterase inhibitor 38 Arabidopsis thaliana (Mouse-ear cress)	4e-34	O81320	po11_olive_001055	Pectinesterase Erythranthe guttata (Yellow monkey flower) (Mimulus guttatus)	OE6A071540T1	Pectinesterase 4	YES	YES	YES	-	-	-	-
P1C78-PoP	78_014_G06_2011-12-12.ab1	-	-	-	po11_olive_000715	ABC transporter F family member 1 Arabidopsis thaliana (Mouse-ear cress)	OE6A012841T1	ABC transporter F family member 1	YES	YES	YES	YES	YES	YES	YES
P1C79-PoP	79_013_G07_2011-12-12.ab1	LIM domain-containing protein PLIM2c Arabidopsis thaliana (Mouse-ear cress)	3e-84	Q500W4	po11_olive_007533	LIM domain-containing protein PLIM2c Arabidopsis thaliana (Mouse-ear cress)	OE6A054960T1	Pollen-specific protein SF3	YES	YES	YES	-	-	-	-
P1C80-PoP	80_014_G08_2011-12-12.ab1	-	-	-	po11_olive_021777	-	OE6A075553T1	Pyridoxal kinase	YES	YES	YES	-	-	YES	-
P1C81-PoP	81_013_G09_2011-12-13.ab1	-	-	-	po11_olive_017940_split_0	Pectinesterase/pectinesterase inhibitor PPE8B Prunus persica (Peach) (Amygdalus persica)	OE6A089469T1	Pectinesterase 4	YES	YES	YES	-	YES	YES	-
P1C82-PoP	82_014_G10_2011-12-13.ab1	Aspartic proteinase-like protein 2 Arabidopsis thaliana (Mouse-ear cress)	3e-67	Q9S9K4	po11_olive_001511	Aspartic proteinase-like protein 2 Arabidopsis thaliana (Mouse-ear cress)	OE6A061149T1	Aspartic proteinase-like protein 2	-	-	-	-	-	-	-
P1C83-PoP	83_013_G11_2011-12-13.ab1	-	-	-	-	-	-	-	-	-	-	-	-	-	-
P1C84-PoP	84_014_G12_2011-12-13.ab1	La-related protein 6C Arabidopsis thaliana (Mouse-ear cress)	2e-69	Q9LHL3	po11_olive_002277	La-related protein 6C Arabidopsis thaliana (Mouse-ear cress)	OE6A062052T1	La-related protein 6C	YES	YES	YES	-	-	-	-
P1C85-PoP	85_015_H01_2011-12-12.ab1	-	-	-	-	-	-	-	-	-	-	-	-	-	-
P1C86-PoP	86_016_H02_2011-12-12.ab1	Sugar transport protein 11 Arabidopsis thaliana (Mouse-ear cress)	0	Q9FMX3	po11_olive_000707	Sugar transport protein 10 Arabidopsis thaliana (Mouse-ear cress)	OE6A047120T1	Sugar transport protein 10	-	YES	YES	-	-	-	-
P1C87-PoP	87_015_H03_2011-12-12.ab1	GDSL esterase/lipase At3g62280 Arabidopsis thaliana (Mouse-ear cress)	5e-09	Q6NLP7	po11_olive_002057	-	OE6A088096T1	GDSL esterase/lipase At3g48460	YES	YES	YES	-	-	-	-
P1C88-PoP	88_016_H04_2011-12-12.ab1	Uncharacterized protein Erythranthe guttata (Yellow monkey flower) (Mimulus guttatus)	4e-31	A0A022S321	po11_olive_006321	Uncharacterized protein Erythranthe guttata (Yellow monkey flower) (Mimulus guttatus)	OE6A019453T1	Serine/threonine-protein kinase rio1	YES	YES	YES	-	-	YES	-
P1C89-PoP	89_015_H05_2011-12-12.ab1	-	-	-	po11_olive_000239	L-ascorbate oxidase homolog Nicotiana tabacum (Common tobacco)	OE6A036630T1	L-ascorbate oxidase homolog	YES	YES	YES	-	YES	YES	-
P1C90-PoP	90_016_H06_2011-12-12.ab1	-	-	-	-	-	-	-	-	-	-	-	-	-	-
P1C91-PoP	91_015_H07_2011-12-12.ab1	Pollen-specific protein C13 Zea mays (Maize)	1e-08	P33050	po11_olive_023452	Allergen Fra e 1 Fraxinus excelsior (European ash)	OE6A003095T1	Major pollen allergen Ole e 1	YES	YES	YES	-	YES	YES	-
P1C92-PoP	92_016_H08_2011-12-12.ab1	-	-	-	po11_olive_000100	L-ascorbate oxidase homolog Brassica napus (Rape)	OE6A036630T1	L-ascorbate oxidase homolog	YES	YES	YES	-	YES	YES	-
P1C93-PoP	93_015_H09_2011-12-13.ab1	-	-	-	po11_olive_000015_split_1	ABC transporter B family member 9 Arabidopsis thaliana (Mouse-ear cress)	OE6A023001T1	ABC transporter B family member 9	YES	YES	YES	YES	-	YES	-
P1C94-PoP	94_016_H10_2011-12-13.ab1	-	-	-	po11_olive_007555	Pectinesterase 4 Arabidopsis thaliana (Mouse-ear cress)	OE6A089469T1	Pectinesterase 4	YES	YES	YES	-	YES	YES	-
P1C95-Po	95_015_H11_2011-12-13.ab1	-	-	-	-	-	-	-	-	-	-	-	-	-	-
P1C96-PoP	96_016_H12_2011-12-13.ab1	-	-	-	-	-	-	-	-	-	-	-	-	-	-
P2C1-PoP	1_001_A01_2012-02-06.ab1	Rop guanine nucleotide exchange factor 9 Arabidopsis thaliana (Mouse-ear cress)	3e-106	Q9SVQ3	po11_olive_001743	Rho guanine nucleotide exchange factor 8 Arabidopsis thaliana (Mouse-ear cress)	OE6A007808T1	Rho guanine nucleotide exchange factor 8	-	-	-	-	-	-	-
P2C2PoP	2_002_A02_2012-02-06.ab1	Shaggy-related protein kinase theta Arabidopsis thaliana (Mouse-ear cress)	9e-112	Q96287	po11_olive_001079	Shaggy-related protein kinase theta Arabidopsis thaliana (Mouse-ear cress)	OE6A070769T4	Shaggy-related protein kinase theta	YES	YES	YES	-	-	-	-
P2C3-PoP	3_001_A03_2012-02-06.ab1	Uncharacterized protein Erythranthe guttata (Yellow monkey flower) (Mimulus guttatus)	7e-40	A0A022RJP0	po11_olive_014490	Probable inactive receptor kinase At5g67200 Arabidopsis thaliana (Mouse-ear cress)	OE6A080815T1	F-box protein SKIP14	YES	YES	YES	-	-	-	-
P2C4-PoP	4_002_A04_2012-02-06.ab1	-	-	-	-	-	-	-	-	-	-	-	-	-	-
P2C5-PoP	5_001_A05_2012-02-06.ab1	Polygalacturonase Hypericum perforatum (St. John's wort)	3e-46	D9ZHD7	po11_olive_003205	Polygalacturonase Hypericum perforatum (St. John's wort)	OE6A111274T1	Exopolygalacturonase clone GBGA483	YES	YES	YES	-	-	-	-
P2C6-PoP	6_002_A06_2012-02-06.ab1	-	-	-	po11_olive_010073	-	OE6A102085T1	1-aminocyclopropane-1-carboxylate oxidase homolog 11	YES	-	-	-	-	-	-
P2C7-PoP	7_001_A07_2012-02-06.ab1	-	-	-	po11_olive_000051	Cellulose synthase-like protein D1 Arabidopsis thaliana (Mouse-ear cress)	OE6A015037T1	Cellulose synthase-like protein D1	YES	YES	YES	-	-	-	-
P2C8-PoP	8_002_A08_2012-02-06.ab1	-	-	-	po11_olive_016743	Uncharacterized protein Theobroma cacao (Cacao) (Cocoa)	OE6A075553T1	Pyridoxal kinase	YES	YES	YES	-	-	-	-
P2C9-PoP	9_001_A09_2012-02-06.ab1	-	-	-	po11_olive_001185	2 of Probable pectinesterase/pectinesterase inhibitor 25 Arabidopsis thaliana GN=PME25	OE6A089469T1	Pectinesterase 4	YES	YES	YES	-	YES	YES	-
P2C10-PoP	10_002_A10_2012-02-06.ab1	Glycerophosphodiester phosphodiesterase GDPDL6 Arabidopsis thaliana (Mouse-ear cress)	0	Q9FGT9	po11_olive_000419	Glycerophosphodiester phosphodiesterase GDPDL7 Arabidopsis thaliana (Mouse-ear cress)	OE6A104488T2	Probable glycerophosphoryl diester phosphodiesterase 2	YES	YES	YES	-	-	-	-
P2C11-PoP	11_001_A11_2012-02-07.ab1	Delta(12)-acyl-lipid-desaturase Punica granatum (Pomegranate)	1e-73	Q84VT2	po11_olive_002339	Omega-6 fatty acid desaturase, endoplasmic reticulum isozyme 2 Glycine max (Soybean) (Glycine hispida)	OE6A067271T1	Omega-6 fatty acid desaturase, endoplasmic reticulum isozyme 2	YES	YES	YES	YES	YES	-	-
P2C12-PoP	12_002_A12_2012-02-07.ab1	-	-	-	po11_olive_006626	-	-	-	-	-	-	-	-	-	-
P2C13-PoP	13_003_B01_2012-02-06.ab1	Rapid alkalinization factor Nicotiana tabacum (Common tobacco)	0.0004	Q945T0	po11_olive_022975	Rapid alkalinization factor 23 Arabidopsis thaliana (Mouse-ear cress)	-	-	YES	-	-	-	-	-	-
P2C14-PoP	14_004_B02_2012-02-06.ab1	Probable galacturonosyltransferase-like 4 Arabidopsis thaliana (Mouse-ear cress)	2e-85	Q9M8J2	po11_olive_004161	Probable galacturonosyltransferase-like 4 Arabidopsis thaliana (Mouse-ear cress)	OE6A043310T1	Probable galacturonosyltransferase-like 4	YES	YES	YES	-	-	YES	-
P2C15-PoP	15_003_B03_2012-02-06.ab1	Sugar transport protein 11 Arabidopsis thaliana (Mouse-ear cress)	0	Q9FMX3	po11_olive_000707	Sugar transport protein 10 Arabidopsis thaliana (Mouse-ear cress)	OE6A047120T1	Sugar transport protein 10	-	YES	YES	-	-	-	-
P2C16-PoP	16_004_B04_2012-02-06.ab1	-	-	-	po11_olive_017940_split_0	Pectinesterase/pectinesterase inhibitor PPE8B Prunus persica (Peach) (Amygdalus persica)	OE6A089469T1	Pectinesterase 4	YES	YES	YES	-	YES	YES	-
P2C17-PoP	17_003_B05_2012-02-06.ab1	Actin-depolymerizing factor 7 Arabidopsis thaliana (Mouse-ear cress)	1e-84	Q67ZM4	po11_olive_008845	Actin-depolymerizing factor 7 Arabidopsis thaliana (Mouse-ear cress)	OE6A038617T1	Actin-depolymerizing factor 7	YES	YES	YES	-	-	-	-
P2C18-PoP	18_004_B06_2012-02-06.ab1	-	-	-	-	-	-	-	-	-	-	-	-	-	-
P2C19-PoP	19_003_B07_2012-02-06.ab1	Uncharacterized protein Cajanus cajan (Pigeon pea) (Cajanus indicus)	2e-08	A0A151TV21	po11_olive_010787	Putative uncharacterized protein Populus trichocarpa (Western balsam poplar) (Populus balsamifera subsp. trichocarpa)	-	-	YES	YES	YES	-	-	-	-
P2C20-PoP	20_004_B08_2012-02-06.ab1	-	-	-	po11_olive_003097	Putative uncharacterized protein Vitis vinifera (Grape)	-	-	YES	YES	YES	-	-	-	-
P2C21-PoP	21_003_B09_2012-02-06.ab1	-	-	-	-	-	-	-	-	-	-	-	-	-	-
P2C22-PoP	22_004_B10_2012-02-06.ab1	-	-	-	po11_olive_001849	Pectate lyase Lilium longiflorum (Trumpet lily)	OE6A101696T1	Pectate lyase	YES	YES	YES	-	-	YES	-
P2C23-PoP	23_003_B11_2012-02-07.ab1	-	-	-	po11_olive_003691	-	OE6A022700T2	Xylosyltransferase 1	YES	YES	YES	-	-	-	-
P2C24-PoP	24_004_B12_2012-02-07.ab1	-	-	-	-	-	-	-	-	-	-	-	-	-	-
P2C25-PoP	25_005_C01_2012-02-06.ab1	-	-	-	po11_olive_017940_split_0	Pectinesterase/pectinesterase inhibitor PPE8B Prunus persica (Peach) (Amygdalus persica)	OE6A089469T1	Pectinesterase 4	YES	YES	YES	-	YES	YES	-
P2C26-PoP	26_006_C02_2012-02-06.ab1	Uncharacterized protein Populus trichocarpa (Western balsam poplar) (Populus balsamifera subsp. trichocarpa)	0.0001	B9HLD0	po11_olive_014483	Uncharacterized protein Erythranthe guttata (Yellow monkey flower) (Mimulus guttatus)	OE6A059211T1	Probable serine/threonine-protein kinase Cx32, chloroplastic	YES	YES	YES	-	-	YES	-
P2C27-PoP	27_005_C03_2012-02-06.ab1	-	-	-	po11_olive_016809	-	-	-	YES	YES	YES	-	-	-	-
P2C28-PoP	28_006_C04_2012-02-06.ab1	-	-	-	po11_olive_000037_split_0	Probable pectinesterase/pectinesterase inhibitor 13 Arabidopsis thaliana (Mouse-ear cress)	OE6A089469T1	Pectinesterase 4	-	-	-	-	-	-	-
P2C29-PoP	29_005_C05_2012-02-06.ab1	BnaA01g07640D protein Brassica napus (Rape)	3e-09	A0A078IF20	po11_olive_006277	Vacuolar protein sorting-associated protein 32 homolog 1 Arabidopsis thaliana (Mouse-ear cress)	OE6A036980T1	Vacuolar protein sorting-associated protein 32 homolog 2	-	-	-	-	-	-	-
P2C30-PoP	30_006_C06_2012-02-06.ab1	-	-	-	po11_olive_022029	-	-	-	-	YES	YES	-	-	-	-
P2C31-PoP	31_005_C07_2012-02-06.ab1	-	-	-	po11_olive_000833	Phospholipase D delta Arabidopsis thaliana (Mouse-ear cress)	OE6A068998T1	Phospholipase D delta	-	-	-	-	-	-	-
P2C32-PoP	32_006_C08_2012-02-06.ab1	Probable pectate lyase P59 Solanum lycopersicum (Tomato) (Lycopersicon esculentum)	3e-71	P15722	po11_olive_000098	Probable pectate lyase 12 Arabidopsis thaliana (Mouse-ear cress)	OE6A095129T1	Probable pectate lyase P59	YES	YES	YES	-	-	YES	-
P2C33-PoP	33_005_C09_2012-02-06.ab1	Allergen Fra e 1 Fraxinus excelsior (European ash)	1e-66	Q6U740	po11_olive_004279	Allergen Fra e 1 Fraxinus excelsior (European ash)	OE6A083939T1	Major pollen allergen Ole e 1	YES	YES	YES	YES	YES	YES	-
P2C34-PoP	34_006_C10_2012-02-06.ab1	-	-	-	po11_olive_000957	Coffea canephora DH200=94 genomic scaffold, scaffold_1 Coffea canephora (Robusta coffee)	OE6A030894T1	Leukocyte receptor cluster member 8 homolog	-	-	-	-	-	-	-
P2C35-PoP	35_005_C11_2012-02-07.ab1	Pathogenesis-related protein PR-1 Medicago truncatula (Barrel medic) (Medicago tribuloides)	3e-14	Q40374	po11_olive_004695	SEC1 family transport protein SLY1 Arabidopsis thaliana (Mouse-ear cress)	OE6A096126T1	Pathogenesis-related protein 1C	YES	YES	YES	-	-	-	-
P2C36-PoP	36_006_C12_2012-02-07.ab1	-	-	-	po11_olive_000002	Actin Phytophthora megasperma (Potato pink rot fungus)	OE6A071481T2	Actin-7	YES	YES	YES	YES	YES	YES	YES
P2C37-PoP	37_007_D01_2012-02-06.ab1	-	-	-	po11_olive_017940_split_0	Pectinesterase/pectinesterase inhibitor PPE8B Prunus persica (Peach) (Amygdalus persica)	OE6A089469T1	Pectinesterase 4	YES	YES	YES	-	YES	YES	-
P2C38-PoP	38_008_D02_2012-02-06.ab1	-	-	-	po11_olive_009309	LIM domain-containing protein PLIM2c Arabidopsis thaliana (Mouse-ear cress)	OE6A054960T1	Pollen-specific protein SF3	-	-	-	-	-	-	-
P2C39-PoP	39_007_D03_2012-02-06.ab1	-	-	-	po11_olive_000519	Uncharacterized protein Solanum tuberosum (Potato)	OE6A116313T1	Galactose oxidase	YES	YES	YES	-	-	-	-
P2C40-PoP	40_008_D04_2012-02-06.ab1	Uncharacterized protein Cajanus cajan (Pigeon pea) (Cajanus indicus)	3e-08	A0A151TV21	po11_olive_010787	Putative uncharacterized protein Populus trichocarpa (Western balsam poplar) (Populus balsamifera subsp. trichocarpa)	-	-	YES	YES	YES	-	-	-	-
P2C41-PoP	41_007_D05_2012-02-06.ab1	Uncharacterized protein Solanum lycopersicum (Tomato) (Lycopersicon esculentum)	0.5	K4AYC7	-	-	OE6A071739T1	Sucrose transport protein SUC2	-	-	-	-	-	-	-
P2C42-PoP	42_008_D06_2012-02-06.ab1	TPR repeat-containing thioredoxin TTL4 Arabidopsis thaliana (Mouse-ear cress)	0	Q84JR9	po11_olive_000569	Inactive TPR repeat-containing thioredoxin TTL3 Arabidopsis thaliana (Mouse-ear cress)	OE6A084177T1	Inactive TPR repeat-containing thioredoxin TTL3	YES	YES	YES	-	-	-	-
P2C43-PoP	43_007_D07_2012-02-06.ab1	Uncharacterized protein Erythranthe guttata (Yellow monkey flower) (Mimulus guttatus)	2e-47	A0A022QD69	po11_olive_010707	Uncharacterized protein Erythranthe guttata (Yellow monkey flower) (Mimulus guttatus)	OE6A055044T1	Cellulose synthase A catalytic subunit 4 [UDP-forming]	-	YES	YES	-	-	-	-
P2C44-PoP	44_008_D08_2012-02-06.ab1	-	-	-	po11_olive_000027_split_1	ATPase 8, plasma membrane-type Arabidopsis thaliana (Mouse-ear cress)	OE6A024275T2	ATPase 8, plasma membrane-type	YES	YES	YES	-	-	-	-
P2C45-PoP	45_007_D09_2012-02-06.ab1	-	-	-	po11_olive_001055	Pectinesterase Erythranthe guttata (Yellow monkey flower) (Mimulus guttatus)	OE6A071540T1	Pectinesterase 4	YES	YES	YES	-	YES	YES	-
P2C46-PoP	46_008_D10_2012-02-06.ab1	-	-	-	po11_olive_011583	-	-	-	YES	YES	YES	-	-	-	-
P2C47-PoP	47_007_D11_2012-02-07.ab1	-	-	-	po11_olive_004583	-	OE6A118184T1	Phosphatidylinositol 3,4,5-trisphosphate 3-phosphatase and dual-specificity protein phosphatase PTEN	YES	YES	YES	-	-	-	-
P2C48-PoP	48_008_D12_2012-02-07.ab1	-	-	-	po11_olive_000371	Subtilisin-like protease SBT3.3 Arabidopsis thaliana (Mouse-ear cress)	OE6A093401T1	Alpha-L-arabinofuranosidase 1	YES	YES	YES	-	-	-	-
P2C49-PoP	49_009_E01_2012-02-06.ab1	-	-	-	po11_olive_002057	-	OE6A088096T1	GDSL esterase/lipase At3g48460	YES	YES	YES	-	-	YES	-
P2C50-PoP	50_010_E02_2012-02-06.ab1	Uncharacterized protein Daucus carota subsp. sativus.	0.007	A0A161YDQ9	po11_olive_016743	Uncharacterized protein Theobroma cacao (Cacao) (Cocoa)	OE6A075553T1	Pyridoxal kinase	YES	YES	YES	-	-	-	-
P2C51-PoP	51_009_E03_2012-02-06.ab1	-	-	-	-	-	-	-	-	-	-	-	-	-	-
P2C52-PoP	52_010_E04_2012-02-06.ab1	S-adenosylmethionine decarboxylase proenzyme Pisum sativum (Garden pea)	2e-42	Q43820	po11_olive_001633	S-adenosylmethionine decarboxylase proenzyme Ipomoea nil (Japanese morning glory) (Pharbitis nil)	OE6A034184T4	S-adenosylmethionine decarboxylase proenzyme	YES	YES	YES	YES	YES	YES	-
P2C53-PoP	53_009_E05_2012-02-06.ab1	Expansin-A32 Oryza sativa subsp. japonica (Rice)	4e-48	Q6YYW5	po11_olive_005759	Expansin-A11 Oryza sativa subsp. japonica (Rice)	OE6A098852T1	Expansin-A32	YES	YES	YES	-	YES	YES	-
P2C54-PoP	54_010_E06_2012-02-06.ab1	-	-	-	po11_olive_012679	-	-	-	YES	YES	YES	-	YES	YES	-
P2C55-PoP	55_009_E07_2012-02-06.ab1	-	-	-	po11_olive_001629	Protein TPX2 Arabidopsis thaliana (Mouse-ear cress)	OE6A013031T1	Wall-associated receptor kinase 2	YES	YES	YES	-	-	-	-
P2C56-PoP	56_010_E08_2012-02-06.ab1	-	-	-	po11_olive_012341	-	-	-	YES	YES	YES	-	YES	YES	-
P2C57-PoP	57_009_E09_2012-02-06.ab1	Zinc finger protein ZAT5 Arabidopsis thaliana (Mouse-ear cress)	3e-29	Q681X4	po11_olive_012871	Zinc finger protein ZAT8 Arabidopsis thaliana (Mouse-ear cress)	OE6A002456T1	Zinc finger protein ZAT5	-	-	-	-	-	-	-
P2C58-PoP	58_010_E10_2012-02-06.ab1	-	-	-	po11_olive_000074	ATPase 3, plasma membrane-type Arabidopsis thaliana (Mouse-ear cress)	OE6A024275T3	ATPase 8, plasma membrane-type	YES	YES	YES	-	-	-	-
P2C59-PoP	59_009_E11_2012-02-07.ab1	Uncharacterized protein Coffea canephora (Robusta coffee)	3e-35	A0A068UZ07	po11_olive_001103	Heterogeneous nuclear ribonucleoprotein 1 Arabidopsis thaliana (Mouse-ear cress)	OE6A045496T7	Heterogeneous nuclear ribonucleoprotein 1	YES	-	-	-	-	-	-
P2C60-PoP	60_010_E12_2012-02-07.ab1	Uncharacterized protein Daucus carota subsp. sativus.	0.007	A0A161YDQ9	po11_olive_016743	Uncharacterized protein Theobroma cacao (Cacao) (Cocoa)	OE6A075553T1	Pyridoxal kinase	YES	YES	YES	-	-	-	-
P2C61-PoP	61_011_F01_2012-02-06.ab1	-	-	-	po11_olive_000861	L-ascorbate oxidase homolog Nicotiana tabacum (Common tobacco)	OE6A066907T1	L-ascorbate oxidase homolog	YES	YES	YES	YES	-	-	-
P2C62-PoP	62_012_F02_2012-02-06.ab1	-	-	-	-	-	-	-	-	-	-	-	-	-	-
P2C63-PoP	63_011_F03_2012-02-06.ab1	Polygalacturonase Medicago sativa (Alfalfa)	7e-97	Q40312	po11_olive_001602	Polygalacturonase Medicago sativa (Alfalfa)	OE6A011584T1	Polygalacturonase	YES	YES	YES	-	-	-	-
P2C64-PoP	64_012_F04_2012-02-06.ab1	Delta(12)-fatty-acid desaturase FAD2 Vernicia fordii (Tung) (Aleurites fordii)	9e-65	Q8GZC3	po11_olive_002655	Omega-6 fatty acid desaturase, endoplasmic reticulum isozyme 2 Glycine max (Soybean) (Glycine hispida)	OE6A098403T1	Omega-6 fatty acid desaturase, endoplasmic reticulum isozyme 2	YES	YES	YES	-	YES	YES	-
P2C65-PoP	65_011_F05_2012-02-06.ab1	Probable pectinesterase/pectinesterase inhibitor 13 Arabidopsis thaliana (Mouse-ear cress)	0	Q7Y201	po11_olive_001055	Pectinesterase Erythranthe guttata (Yellow monkey flower) (Mimulus guttatus)	OE6A071540T1	Pectinesterase 4	YES	YES	YES	-	-	-	-
P2C66-PoP	66_012_F06_2012-02-06.ab1	Expansin-A2 Arabidopsis thaliana (Mouse-ear cress)	8e-11	Q38866	po11_olive_005759	Expansin-A11 Oryza sativa subsp. japonica (Rice)	OE6A098852T1	Expansin-A32	YES	YES	YES	-	-	-	-
P2C67-PoP	67_011_F07_2012-02-06.ab1	-	-	-	po11_olive_001875	Putative uncharacterized protein Vitis vinifera (Grape)	OE6A093803T1	Protein ASPARTIC PROTEASE IN GUARD CELL 1	YES	YES	YES	-	YES	YES	-
P2C68-PoP	68_012_F08_2012-02-06.ab1	-	-	-	po11_olive_007733	-	-	-	YES	YES	YES	-	-	-	-
P2C69-PoP	69_011_F09_2012-02-06.ab1	Pectinesterase Petunia integrifolia (Violet-flowered petunia) (Salpiglossis integrifolia)	1e-34	Q43043	po11_olive_000076	-	OE6A089469T1	Pectinesterase 4	YES	YES	YES	-	YES	YES	-
P2C70-PoP	70_012_F10_2012-02-06.ab1	-	-	-	po11_olive_017940_split_0	Pectinesterase/pectinesterase inhibitor PPE8B Prunus persica (Peach) (Amygdalus persica)	OE6A089469T1	Pectinesterase 4	YES	YES	YES	-	YES	YES	-
P2C71-PoP	71_011_F11_2012-02-07.ab1	Dormancy-associated protein homolog 4 Arabidopsis thaliana (Mouse-ear cress)	4e-12	F4HV65	po11_olive_006077	Auxin-repressed 12.5 kDa protein Fragaria ananassa (Strawberry)	OE6A061143T3	Zinc finger SWIM domain-containing protein 7	-	-	-	-	-	-	-
P2C72-PoP	72_012_F12_2012-02-07.ab1	-	-	-	-	-	-	-	-	-	-	-	-	-	-
P2C73-PoP	73_013_G01_2012-02-06.ab1	Putative ovule protein Solanum chacoense (Chaco potato)	3e-77	A0A0V0IDW0	po11_olive_000265	2 of Protein FAR1-RELATED SEQUENCE 3 Arabidopsis thaliana GN=FRS3	OE6A106939T3	Protein FAR1-RELATED SEQUENCE 3	-	-	-	-	-	-	-
P2C74-PoP	74_014_G02_2012-02-06.ab1	2 of Transcription factor bHLH112 Arabidopsis thaliana GN=BHLH112	0.19	Q94JL3-2	-	-	OE6A109783T1	Probable sugar phosphate/phosphate translocator At3g11320	YES	YES	YES	-	-	-	-
P2C75-PoP	75_013_G03_2012-02-06.ab1	-	-	-	po11_olive_025895	-	-	-	-	-	-	-	-	-	-
P2C76-PoP	76_014_G04_2012-02-06.ab1	Uncharacterized protein Coffea canephora (Robusta coffee)	0	A0A068V8T3	po11_olive_000149	Receptor-like protein kinase ANXUR1 Arabidopsis thaliana (Mouse-ear cress)	OE6A084904T1	Receptor-like protein kinase ANXUR1	YES	YES	YES	-	YES	-	-
P2C77-PoP	77_013_G05_2012-02-06.ab1	-	-	-	po11_olive_002339	Omega-6 fatty acid desaturase, endoplasmic reticulum isozyme 2 Glycine max (Soybean) (Glycine hispida)	OE6A067271T1	Omega-6 fatty acid desaturase, endoplasmic reticulum isozyme 2	YES	YES	YES	YES	-	YES	-
P2C78-PoP	78_014_G06_2012-02-06.ab1	-	-	-	po11_olive_006626	-	OE6A022700T2	Xylosyltransferase 1	-	-	-	-	-	-	-
P2C79-PoP	79_013_G07_2012-02-06.ab1	-	-	-	po11_olive_001055	Pectinesterase Erythranthe guttata (Yellow monkey flower) (Mimulus guttatus)	OE6A071540T1	Pectinesterase 4	YES	YES	YES	-	YES	YES	-
P2C80-PoP	80_014_G08_2012-02-06.ab1	4-nitrophenylphosphatase Arundo donax (Giant reed) (Donax arundinaceus)	2e-09	A0A0A9P2U1	po11_olive_001091	2 of PTI1-like tyrosine-protein kinase 3 Arabidopsis thaliana GN=PTI13	OE6A095504T3	PTI1-like tyrosine-protein kinase 3	-	-	-	-	-	-	-
P2C81-PoP	81_013_G09_2012-02-06.ab1	-	-	-	po11_olive_017405	-	-	-	-	YES	YES	-	-	-	-
P2C82-PoP	82_014_G10_2012-02-06.ab1	-	-	-	po11_olive_012679	-	-	-	YES	YES	YES	-	YES	YES	-
P2C83-PoP	83_013_G11_2012-02-07.ab1	-	-	-	po11_olive_000027_split_1	ATPase 8, plasma membrane-type Arabidopsis thaliana (Mouse-ear cress)	OE6A024275T3	ATPase 8, plasma membrane-type	YES	YES	YES	-	YES	-	-
P2C84-PoP	84_014_G12_2012-02-07.ab1	Chaperonin-like RbcX protein isoform 2 Theobroma cacao (Cacao) (Cocoa)	7e-16	A0A061GZA2	po11_olive_019637	Chaperonin-like RbcX protein isoform 2 Theobroma cacao (Cacao) (Cocoa)	OE6A064956T1	Eukaryotic peptide chain release factor GTP-binding subunit ERF3A	YES	-	-	-	-	-	-
P2C85-PoP	85_015_H01_2012-02-06.ab1	-	-	-	-	-	-	-	-	-	-	-	-	-	-
P2C86-PoP	86_016_H02_2012-02-06.ab1	-	-	-	po11_olive_000963	Probable pectinesterase/pectinesterase inhibitor 21 Arabidopsis thaliana (Mouse-ear cress)	OE6A008307T1	Probable pectinesterase/pectinesterase inhibitor 21	YES	YES	YES	-	-	-	-
P2C87-PoP	87_015_H03_2012-02-06.ab1	Probable serine/threonine-protein kinase PBL25 Arabidopsis thaliana (Mouse-ear cress)	1e-10	Q9LRY1	po11_olive_000697	Serine/threonine-protein kinase PBS1 Arabidopsis thaliana (Mouse-ear cress)	OE6A060886T1	Serine/threonine-protein kinase PBS1	-	YES	-	-	-	-	-
P2C88-PoP	88_016_H04_2012-02-06.ab1	-	-	-	-	-	-	-	-	-	-	-	-	-	-
P2C89-PoP	89_015_H05_2012-02-06.ab1	Uncharacterized protein Solanum tuberosum (Potato)	1e-09	M0ZQJ9	po11_olive_010767	Uncharacterized protein Solanum tuberosum (Potato)	-	-	YES	YES	YES	-	-	-	-
P2C90-PoP	90_016_H06_2012-02-06.ab1	-	-	-	-	-	-	-	-	-	-	-	-	-	-
P2C91-PoP	91_015_H07_2012-02-06.ab1	-	-	-	po11_olive_007555	Pectinesterase 4 Arabidopsis thaliana (Mouse-ear cress)	OE6A089469T1	Pectinesterase 4	YES	YES	YES	-	YES	YES	-
P2C92-PoP	92_016_H08_2012-02-06.ab1	GDSL esterase/lipase At3g62280 Arabidopsis thaliana (Mouse-ear cress)	8e-09	Q6NLP7	po11_olive_002057	-	OE6A088096T1	GDSL esterase/lipase At3g48460	YES	YES	YES	-	-	-	-
P2C93-PoP	93_015_H09_2012-02-06.ab1	Pectate lyase Erythranthe guttata (Yellow monkey flower) (Mimulus guttatus)	1e-39	A0A022Q1L1	po11_olive_006151	Pectate lyase Lilium longiflorum (Trumpet lily)	OE6A101696T1	Pectate lyase	YES	YES	YES	-	-	YES	-
P2C94-PoP	94_016_H10_2012-02-06.ab1	-	-	-	-	-	-	-	-	-	-	-	-	-	-
P2C95-PoP	95_015_H11_2012-02-07.ab1	-	-	-	-	-	-	-	-	-	-	-	-	-	-
P2C96-PoP	96_016_H12_2012-02-07.ab1	Purple acid phosphatase 17 Arabidopsis thaliana (Mouse-ear cress)	4e-80	Q9SCX8	po11_olive_003391	Purple acid phosphatase 17 Arabidopsis thaliana (Mouse-ear cress)	OE6A000551T1	Purple acid phosphatase 17	YES	YES	YES	YES	-	-	-
P4C1-PoP	1_SP6_A01.ab1	-	-	-	-	-	-	-	-	-	-	-	-	-	-
P4C2-PoP	2_SP6_A03.ab1	-	-	-	-	-	-	-	-	-	-	-	-	-	-
P4C3-PoP	3_SP6_A05.ab1	-	-	-	-	-	-	-	-	-	-	-	-	-	-
P4C4-PoP	4_SP6_A07.ab1	-	-	-	-	-	-	-	-	-	-	-	-	-	-
P4C5-PoP	5_SP6_A09.ab1	Expansin-A11 Oryza sativa subsp. japonica (Rice)	0	Q4PNY1	po11_olive_006787	Expansin-A32 Oryza sativa subsp. japonica (Rice)	OE6A098852T1	Expansin-A32	YES	YES	YES	-	-	-	-
P4C6-PoP	6_SP6_A11.ab1	-	-	-	-	-	-	-	-	-	-	-	-	-	-
P4C7-PoP	7_SP6_A13.ab1	-	-	-	-	-	-	-	-	-	-	-	-	-	-
P4C8-PoP	8_SP6_A15.ab1	-	-	-	-	-	-	-	-	-	-	-	-	-	-
P4C9-PoP	9_SP6_A17.ab1	-	-	-	po11_olive_002112	Probable pectate lyase 3 Arabidopsis thaliana (Mouse-ear cress)	OE6A101696T1	Pectate lyase	YES	YES	YES	-	YES	YES	-
P4C10-PoP	10_SP6_A19.ab1	-	-	-	po11_olive_021777	-	OE6A075553T1	Pyridoxal kinase	YES	YES	YES	-	-	YES	-
P4C11-PoP	11_SP6_A21.ab1	-	-	-	-	-	-	-	-	-	-	-	-	-	-
P4C12-PoP	12_SP6_A23.ab1	-	-	-	po11_olive_001959	Tubulin beta-5 chain Zea mays (Maize)	OE6A048258T2	Tubulin beta-5 chain	YES	YES	YES	YES	YES	YES	-
P4C13-PoP	13_SP6_C01.ab1	-	-	-	-	-	-	-	-	-	-	-	-	-	-
P4C14-PoP	14_SP6_C03.ab1	-	-	-	-	-	-	-	-	-	-	-	-	-	-
P4C15-PoP	15_SP6_C05.ab1	-	-	-	-	-	-	-	-	-	-	-	-	-	-
P4C16-PoP	16_SP6_C07.ab1	-	-	-	po11_olive_010473	Allergen Fra e 1 Fraxinus excelsior (European ash)	OE6A120448T1	Major pollen allergen Ole e 1	YES	YES	YES	-	-	-	-
P4C17-PoP	17_SP6_C09.ab1	-	-	-	-	-	-	-	-	-	-	-	-	-	-
P4C18-PoP	18_SP6_C11.ab1	-	-	-	-	-	-	-	-	-	-	-	-	-	-
P4C19-PoP	19_SP6_C13.ab1	-	-	-	po11_olive_004069	Alpha carbonic anhydrase 4 Arabidopsis thaliana (Mouse-ear cress)	OE6A106338T1	Bifunctional monodehydroascorbate reductase and carbonic anhydrase nectarin-3	YES	YES	YES	-	YES	-	-
P4C20-PoP	20_SP6_C15.ab1	-	-	-	-	-	-	-	-	-	-	-	-	-	-
P4C21-PoP	21_SP6_C17.ab1	-	-	-	-	-	-	-	-	-	-	-	-	-	-
P4C22-PoP	22_SP6_C19.ab1	-	-	-	-	-	-	-	-	-	-	-	-	-	-
P4C23-PoP	23_SP6_C21.ab1	-	-	-	po11_olive_001187	Coffea canephora DH200=94 genomic scaffold, scaffold_9 Coffea canephora (Robusta coffee)	OE6A039909T4	Protein SUPPRESSOR OF GENE SILENCING 3	YES	YES	YES	-	-	-	-
P4C24-PoP	24_SP6_C23.ab1	-	-	-	po11_olive_001959	Tubulin beta-5 chain Zea mays (Maize)	OE6A048258T2	Tubulin beta-5 chain	YES	YES	-	-	YES	-	-
P4C25-PoP	25_SP6_E01.ab1	-	-	-	-	-	-	-	-	-	-	-	-	-	-
P4C26-PoP	26_SP6_E03.ab1	-	-	-	-	-	-	-	-	-	-	-	-	-	-
P4C27-PoP	27_SP6_E05.ab1	-	-	-	-	-	-	-	-	-	-	-	-	-	-
P4C28-PoP	28_SP6_E07.ab1	Uncharacterized protein Daucus carota subsp. sativus.	0.006	A0A161YDQ9	po11_olive_016743	Uncharacterized protein Theobroma cacao (Cacao) (Cocoa)	OE6A075553T1	Pyridoxal kinase	YES	YES	YES	-	-	-	-
P4C29-PoP	29_SP6_E09.ab1	-	-	-	po11_olive_003090	Oxygen-evolving enhancer protein 1, chloroplastic Nicotiana tabacum (Common tobacco)	OE6A089469T1	Pectinesterase 4	YES	YES	YES	-	-	YES	-
P4C30-PoP	30_SP6_E11.ab1	Protein RALF-like 9 Arabidopsis thaliana (Mouse-ear cress)	0.002	Q3ECL0	po11_olive_010453_split_0	Rapid alkalinization factor Nicotiana tabacum (Common tobacco)	-	-	YES	YES	YES	-	-	YES	-
P4C31-PoP	31_SP6_E13.ab1	-	-	-	-	-	-	-	-	-	-	-	-	-	-
P4C32-PoP	32_SP6_E15.ab1	-	-	-	-	-	-	-	-	-	-	-	-	-	-
P4C33-PoP	33_SP6_E17.ab1	-	-	-	-	-	-	-	-	-	-	-	-	-	-
P4C34-PoP	34_SP6_E19.ab1	-	-	-	-	-	-	-	-	-	-	-	-	-	-
P4C35-PoP	35_SP6_E21.ab1	-	-	-	-	-	-	-	-	-	-	-	-	-	-
P4C36-PoP	36_SP6_E23.ab1	-	-	-	-	-	-	-	-	-	-	-	-	-	-
P4C37-PoP	37_SP6_G01.ab1	-	-	-	-	-	-	-	-	-	-	-	-	-	-
P4C38-PoP	38_SP6_G03.ab1	-	-	-	-	-	-	-	-	-	-	-	-	-	-
P4C39-PoP	39_SP6_G05.ab1	-	-	-	-	-	-	-	-	-	-	-	-	-	-
P4C40-PoP	40_SP6_G07.ab1	-	-	-	-	-	-	-	-	-	-	-	-	-	-
P4C41-PoP	41_SP6_G09.ab1	-	-	-	-	-	-	-	-	-	-	-	-	-	-
P4C42-PoP	42_SP6_G11.ab1	-	-	-	po11_olive_001011	Putative pectinesterase/pectinesterase inhibitor 28 Arabidopsis thaliana (Mouse-ear cress)	OE6A035393T1	Putative pectinesterase/pectinesterase inhibitor 28	YES	YES	YES	-	-	YES	-
P4C43-PoP	43_SP6_G13.ab1	-	-	-	-	-	-	-	-	-	-	-	-	-	-
P4C44-PoP	44_SP6_G15.ab1	Uncharacterized protein Erythranthe guttata (Yellow monkey flower) (Mimulus guttatus)	1e-21	A0A022PZW7	po11_olive_000909	Coffea canephora DH200=94 genomic scaffold, scaffold_3 Coffea canephora (Robusta coffee)	OE6A009288T1	Exopolygalacturonase	YES	YES	YES	-	-	YES	-
P4C45-PoP	45_SP6_G17.ab1	-	-	-	po11_olive_002121	Glucan endo-1,3-beta-D-glucosidase Olea europaea (Common olive)	OE6A043576T1	Glucan endo-1,3-beta-D-glucosidase	YES	YES	YES	-	-	YES	-
P4C46-PoP	46_SP6_G19.ab1	Rapid alkalinization factor Nicotiana tabacum (Common tobacco)	0.013	Q945T0	po11_olive_010453_split_0	Rapid alkalinization factor Nicotiana tabacum (Common tobacco)	-	-	YES	YES	YES	-	-	YES	-
P4C47-PoP	47_SP6_G21.ab1	-	-	-	po11_olive_004069	Alpha carbonic anhydrase 4 Arabidopsis thaliana (Mouse-ear cress)	OE6A106338T1	Bifunctional monodehydroascorbate reductase and carbonic anhydrase nectarin-3	YES	YES	YES	-	-	-	-
P4C48-PoP	48_SP6_G23.ab1	-	-	-	-	-	-	-	-	-	-	-	-	-	-
P4C49-PoP	49_SP6_I01.ab1	-	-	-	-	-	-	-	-	-	-	-	-	-	-
P4C50-PoP	50_SP6_I03.ab1	-	-	-	-	-	-	-	-	-	-	-	-	-	-
P4C51-PoP	51_SP6_I05.ab1	-	-	-	-	-	-	-	-	-	-	-	-	-	-
P4C52-PoP	52_SP6_I07.ab1	-	-	-	-	-	-	-	-	-	-	-	-	-	-
P4C53-PoP	53_SP6_I09.ab1	-	-	-	po11_olive_001175	Coffea canephora DH200=94 genomic scaffold, scaffold_22 Coffea canephora (Robusta coffee)	OE6A104581T1	Nuclear factor related to kappa-B-binding protein	YES	YES	YES	-	-	-	-
P4C54-PoP	54_SP6_I11.ab1	-	-	-	-	-	-	-	-	-	-	-	-	-	-
P4C55-PoP	55_SP6_I13.ab1	-	-	-	-	-	-	-	-	-	-	-	-	-	-
P4C56-PoP	56_SP6_I15.ab1	-	-	-	-	-	-	-	-	-	-	-	-	-	-
P4C57-PoP	57_SP6_I17.ab1	Olee1-like protein Betula pendula (European white birch) (Betula verrucosa)	1e-06	O49813	po11_olive_004279	Allergen Fra e 1 Fraxinus excelsior (European ash)	OE6A120448T1	Major pollen allergen Ole e 1	YES	YES	YES	-	YES	YES	-
P4C58-PoP	58_SP6_I19.ab1	-	-	-	-	-	-	-	-	-	-	-	-	-	-
P4C59-PoP	59_SP6_I21.ab1	-	-	-	po11_olive_009315	Chaperone protein dnaJ 3 Arabidopsis thaliana (Mouse-ear cress)	OE6A026293T1	Lipid phosphate phosphatase delta	YES	YES	YES	-	YES	-	-
P4C60-PoP	60_SP6_I23.ab1	-	-	-	-	-	-	-	-	-	-	-	-	-	-
P4C61-PoP	61_SP6_K01.ab1	-	-	-	-	-	-	-	-	-	-	-	-	-	-
P4C62-PoP	62_SP6_K03.ab1	-	-	-	-	-	-	-	-	-	-	-	-	-	-
P4C63-PoP	63_SP6_K05.ab1	-	-	-	-	-	-	-	-	-	-	-	-	-	-
P4C64-PoP	64_SP6_K07.ab1	-	-	-	-	-	-	-	-	-	-	-	-	-	-
P4C65-PoP	65_SP6_K09.ab1	-	-	-	-	-	-	-	-	-	-	-	-	-	-
P4C66-PoP	66_SP6_K11.ab1	-	-	-	-	-	-	-	-	-	-	-	-	-	-
P4C67-PoP	67_SP6_K13.ab1	-	-	-	po11_olive_001849	Pectate lyase Lilium longiflorum (Trumpet lily)	OE6A101696T1	Pectate lyase	YES	YES	YES	-	YES	YES	-
P4C68-PoP	68_SP6_K15.ab1	-	-	-	-	-	-	-	-	-	-	-	-	-	-
P4C69-PoP	69_SP6_K17.ab1	-	-	-	-	-	-	-	-	-	-	-	-	-	-
P4C70-PoP	70_SP6_K19.ab1	-	-	-	-	-	-	-	-	-	-	-	-	-	-
P4C71-PoP	71_SP6_K21.ab1	-	-	-	po11_olive_002745	ER-type omega-3 fatty acid desaturase Olea europaea (Common olive)	-	-	YES	YES	YES	-	YES	-	-
P4C72-PoP	72_SP6_K23.ab1	-	-	-	-	-	-	-	-	-	-	-	-	-	-
P4C73-PoP	73_SP6_M01.ab1	-	-	-	-	-	-	-	-	-	-	-	-	-	-
P4C74-PoP	74_SP6_M03.ab1	-	-	-	-	-	-	-	-	-	-	-	-	-	-
P4C75-PoP	75_SP6_M05.ab1	Omega-6 fatty acid desaturase, endoplasmic reticulum isozyme 2 Glycine max (Soybean) (Glycine hispida)	4e-100	P48631	po11_olive_002947	Omega-6 fatty acid desaturase, endoplasmic reticulum isozyme 2 Glycine max (Soybean) (Glycine hispida)	OE6A098403T1	Omega-6 fatty acid desaturase, endoplasmic reticulum isozyme 2	YES	YES	YES	YES	YES	YES	-
P4C76-PoP	76_SP6_M07.ab1	-	-	-	-	-	-	-	-	-	-	-	-	-	-
P4C77-PoP	77_SP6_M09.ab1	-	-	-	po11_olive_000149	Receptor-like protein kinase ANXUR1 Arabidopsis thaliana (Mouse-ear cress)	OE6A084904T1	Receptor-like protein kinase ANXUR1	YES	YES	YES	-	-	-	-
P4C78-PoP	78_SP6_M11.ab1	-	-	-	po11_olive_001889	-	OE6A019012T2	Kynurenine formamidase	YES	YES	YES	YES	YES	YES	-
P4C79-PoP	79_SP6_M13.ab1	-	-	-	po11_olive_005759	Expansin-A11 Oryza sativa subsp. japonica (Rice)	OE6A098852T1	Expansin-A32	YES	YES	YES	-	YES	YES	-
P4C80-PoP	80_SP6_M15.ab1	Uncharacterized protein Daucus carota subsp. sativus.	0.002	A0A161YDQ9	po11_olive_016743	Uncharacterized protein Theobroma cacao (Cacao) (Cocoa)	OE6A075553T1	Pyridoxal kinase	YES	YES	YES	-	-	-	-
P4C81-PoP	81_SP6_M17.ab1	-	-	-	-	-	-	-	-	-	-	-	-	-	-
P4C82-PoP	82_SP6_M19.ab1	Uncharacterized protein Daucus carota subsp. sativus.	0.53	A0A165ZU42	po11_olive_021777	-	OE6A075553T1	Pyridoxal kinase	YES	YES	YES	-	-	YES	-
P4C83-PoP	83_SP6_M21.ab1	-	-	-	-	-	-	-	-	-	-	-	-	-	-
P4C84-PoP	84_SP6_M23.ab1	Uncharacterized protein Daucus carota subsp. sativus.	3e-08	A0A175YKA9	po11_olive_011195	Uncharacterized protein Erythranthe guttata (Yellow monkey flower) (Mimulus guttatus)	OE6A033582T1	ATP-dependent Clp protease proteolytic subunit 4, chloroplastic	YES	YES	YES	-	-	YES	-
P4C85-PoP	85_SP6_O01.ab1	-	-	-	-	-	-	-	-	-	-	-	-	-	-
P4C86-PoP	86_SP6_O03.ab1	-	-	-	-	-	-	-	-	-	-	-	-	-	-
P4C87-PoP	87_SP6_O05.ab1	-	-	-	po11_olive_005755	Coffea canephora DH200=94 genomic scaffold, scaffold_91 Coffea canephora (Robusta coffee)	OE6A050704T1	Translation initiation factor eIF-2B subunit delta	YES	YES	YES	-	YES	-	-
P4C88-PoP	88_SP6_O07.ab1	-	-	-	-	-	-	-	-	-	-	-	-	-	-
P4C89-PoP	89_SP6_O09.ab1	-	-	-	po11_olive_001001	Uncharacterized protein Solanum tuberosum (Potato)	OE6A116313T1	Galactose oxidase	YES	YES	YES	-	-	-	-
P4C90-PoP	90_SP6_O11.ab1	-	-	-	po11_olive_002033	Omega-6 fatty acid desaturase, endoplasmic reticulum isozyme 2 Glycine max (Soybean) (Glycine hispida)	OE6A069627T1	Omega-6 fatty acid desaturase, endoplasmic reticulum isozyme 2	YES	YES	YES	YES	YES	YES	-
P4C91-PoP	91_SP6_O13.ab1	-	-	-	-	-	-	-	-	-	-	-	-	-	-
P4C92-PoP	92_SP6_O15.ab1	-	-	-	-	-	-	-	-	-	-	-	-	-	-
P4C93-PoP	93_SP6_O17.ab1	-	-	-	-	-	-	-	-	-	-	-	-	-	-
P4C94-PoP	94_SP6_O19.ab1	-	-	-	po11_olive_001283	Beta-fructofuranosidase, insoluble isoenzyme 1 Daucus carota (Wild carrot)	OE6A119047T1	Beta-fructofuranosidase, insoluble isoenzyme 1	YES	YES	YES	-	-	YES	-
P4C95-PoP	95_SP6_O21.ab1	Allergen Fra e 1 Fraxinus excelsior (European ash)	0	Q6U740	po11_olive_007365	Allergen Fra e 1 Fraxinus excelsior (European ash)	OE6A114289T1	Major pollen allergen Lig v 1	YES	YES	YES	-	YES	YES	-
P4C96-PoP	96_SP6_O23.ab1	-	-	-	-	-	-	-	-	-	-	-	-	-	-
