# Supplementary material for: Identification and Functional Annotation of Genes Differentially Expressed in the Reproductive Tissues of the Olive Tree (Olea europaea L.) through the Generation of Subtractive Libraries
Source: Front Plant Sci. 2017 Sep 13;8:1576. doi: 10.3389/fpls.2017.01576 (PMC5601413; doi:10.3389/fpls.2017.01576)
Supplement: Supplementary file 9 [file Table9.XLSX]

## Sheet: T_Pollen__D_Leaf_table_complete
Po(L)		FULL-LengtherNext ANNOTATION			REPROLIVE		CRUZ		BLAST WITH Roche/454 READS
Sample	Fastq_id	Description	e-value	Subject_id	pollen_transc_id	pollen_description	cruz_transc_id	cruz_description	pollen_mature	pollen_germ_1h	pollen_germ_5h30min	pistil_stage2	pistil_stage3	pistil_stage4	leaf			Rejected by SeqTrimNext
P1C1-PoL	1_SP6_A01.ab1	-	-	-	-	-	-	-	-	-	-	-	-	-	-
P1C2-PoL	2_SP6_A03.ab1	Uncharacterized protein Erythranthe guttata (Yellow monkey flower) (Mimulus guttatus)	4e-37	A0A022RIB5	po11_olive_023442	Uncharacterized protein Erythranthe guttata (Yellow monkey flower) (Mimulus guttatus)	OE6A114410T1	Late embryogenesis abundant protein D-29	-	-	-	-	-	-	-
P1C3-PoL	3_SP6_A05.ab1	BI1-like protein Arabidopsis thaliana (Mouse-ear cress)	6e-27	Q94A20	po11_olive_008465	BI1-like protein Arabidopsis thaliana (Mouse-ear cress)	OE6A020763T1	BI1-like protein	YES	YES	YES	-	-	-	-
P1C4-PoL	4_SP6_A07.ab1	Sugar transport protein 11 Arabidopsis thaliana (Mouse-ear cress)	8e-50	Q9FMX3	po11_olive_000707	Sugar transport protein 10 Arabidopsis thaliana (Mouse-ear cress)	OE6A047120T1	Sugar transport protein 10	YES	YES	YES	-	-	-	-
P1C5-PoL	5_SP6_A09.ab1	-	-	-	-	-	-	-	-	-	-	-	-	-	-
P1C6-PoL	6_SP6_A11.ab1	Pectinesterase 1 Olea europaea (Common olive)	3e-90	D8VPP5	po11_olive_000046	Pectinesterase 1 Olea europaea (Common olive)	OE6A111519T1	Pectinesterase 2	YES	YES	YES	YES	-	-	-
P1C7-PoL	7_SP6_A13.ab1	-	-	-	-	-	-	-	-	-	-	-	-	-	-
P1C8-PoL	8_SP6_A15.ab1	Phosphatidylinositol/phosphatidylcholine transfer protein SFH3 Arabidopsis thaliana (Mouse-ear cress)	7e-69	Q93ZE9	po11_olive_000723	Phosphatidylinositol/phosphatidylcholine transfer protein SFH12 Arabidopsis thaliana (Mouse-ear cress)	OE6A114567T2	Phosphatidylinositol/phosphatidylcholine transfer protein SFH12	YES	YES	YES	-	-	-	-
P1C9-PoL	9_SP6_A17.ab1	Pectate lyase Lilium longiflorum (Trumpet lily)	4e-42	P40973	po11_olive_001979	Probable pectate lyase P59 Solanum lycopersicum (Tomato) (Lycopersicon esculentum)	OE6A035860T1	Probable pectate lyase P59	YES	YES	YES	-	-	-	-
P1C10-PoL	10_SP6_A19.ab1	-	-	-	-	-	-	-	-	-	-	-	-	-	-
P1C11-PoL	11_SP6_A21.ab1	-	-	-	po11_olive_012341	-	OE6A070422T1	Putative clathrin assembly protein At1g03050	-	-	-	-	-	-	-
P1C12-PoL	12_SP6_A23.ab1	-	-	-	-	-	-	-	-	-	-	-	-	-	-
P1C13-PoL	13_SP6_C01.ab1	-	-	-	po11_olive_003531	Uncharacterized protein Solanum tuberosum (Potato)	OE6A003630T1	DNA double-strand break repair Rad50 ATPase	YES	YES	YES	-	-	-	-
P1C14-PoL	14_SP6_C03.ab1	Pectate lyase Lilium longiflorum (Trumpet lily)	4e-42	P40973	po11_olive_001979	Probable pectate lyase P59 Solanum lycopersicum (Tomato) (Lycopersicon esculentum)	OE6A035860T1	Probable pectate lyase P59	YES	YES	YES	-	-	-	-
P1C15-PoL	15_SP6_C05.ab1	Delta(12)-fatty-acid desaturase FAD2 Vernicia fordii (Tung) (Aleurites fordii)	2e-65	Q8GZC3	po11_olive_002947	Omega-6 fatty acid desaturase, endoplasmic reticulum isozyme 2 Glycine max (Soybean) (Glycine hispida)	OE6A098403T1	Omega-6 fatty acid desaturase, endoplasmic reticulum isozyme 2	YES	YES	YES	-	-	YES	-
P1C16-PoL	16_SP6_C07.ab1	Putative pectinesterase/pectinesterase inhibitor 38 Arabidopsis thaliana (Mouse-ear cress)	3e-40	O81320	po11_olive_001055	Pectinesterase Erythranthe guttata (Yellow monkey flower) (Mimulus guttatus)	OE6A071540T1	Pectinesterase 4	YES	YES	YES	-	YES	-	-
P1C17-PoL	17_SP6_C09.ab1	-	-	-	-	-	-	-	-	-	-	-	-	-	-
P1C18-PoL	18_SP6_C11.ab1	-	-	-	po11_olive_003417	Uncharacterized protein Citrus sinensis (Sweet orange) (Citrus aurantium var. sinensis)	OE6A109584T1	AP-3 complex subunit sigma	YES	YES	YES	-	-	-	-
P1C19-PoL	19_SP6_C13.ab1	-	-	-	po11_olive_002591	2 of PTI1-like tyrosine-protein kinase 3 Arabidopsis thaliana GN=PTI13	-	-	-	-	-	-	-	-	-
P1C20-PoL	20_SP6_C15.ab1	-	-	-	po11_olive_001075	Lysine histidine transporter 2 Arabidopsis thaliana (Mouse-ear cress)	OE6A088749T1	Lysine histidine transporter-like 2	YES	YES	YES	-	-	-	-
P1C21-PoL	21_SP6_C17.ab1	-	-	-	po11_olive_006171	Boron transporter 4 Arabidopsis thaliana (Mouse-ear cress)	OE6A008817T3	Probable boron transporter 7	YES	YES	YES	YES	YES	-	-
P1C22-PoL	22_SP6_C19.ab1	Allergen Fra e 1 Fraxinus excelsior (European ash)	6e-68	Q6U740	po11_olive_004279	Allergen Fra e 1 Fraxinus excelsior (European ash)	OE6A083939T1	Major pollen allergen Ole e 1	YES	YES	YES	YES	YES	YES	-
P1C23-PoL	23_SP6_C21.ab1	-	-	-	-	-	-	-	-	-	-	-	-	-	-
P1C24-PoL	24_SP6_C23.ab1	Uncharacterized protein Daucus carota subsp. sativus.	0.16	A0A161YDQ9	po11_olive_016743	Uncharacterized protein Theobroma cacao (Cacao) (Cocoa)	OE6A075553T1	Pyridoxal kinase	YES	YES	YES	-	-	-	-
P1C25-PoL	25_SP6_E01.ab1	-	-	-	-	-	-	-	-	-	-	-	-	-	-
P1C26-PoL	26_SP6_E03.ab1	-	-	-	-	-	-	-	-	-	-	-	-	-	-
P1C27-PoL	27_SP6_E05.ab1	-	-	-	-	-	-	-	-	-	-	-	-	-	-
P1C28-PoL	28_SP6_E07.ab1	-	-	-	po11_olive_006667	Uncharacterized protein Solanum lycopersicum (Tomato) (Lycopersicon esculentum)	OE6A091303T1	Aminopeptidase N	YES	YES	YES	-	-	-	-
P1C29-PoL	29_SP6_E09.ab1	-	-	-	po11_olive_000707	Sugar transport protein 10 Arabidopsis thaliana (Mouse-ear cress)	OE6A047120T1	Sugar transport protein 10	YES	YES	YES	-	-	-	-
P1C30-PoL	30_SP6_E11.ab1	-	-	-	po11_olive_002233	Probable ADP-ribosylation factor GTPase-activating protein AGD8 Arabidopsis thaliana (Mouse-ear cress)	OE6A111340T3	Probable ADP-ribosylation factor GTPase-activating protein AGD8	-	-	-	-	-	-	-
P1C31-PoL	31_SP6_E13.ab1	-	-	-	-	-	-	-	-	-	-	-	-	-	-
P1C32-PoL	32_SP6_E15.ab1	-	-	-	po11_olive_004171	Probable galacturonosyltransferase-like 4 Arabidopsis thaliana (Mouse-ear cress)	OE6A066278T1	Probable galacturonosyltransferase-like 4	YES	YES	YES	-	-	-	-
P1C33-PoL	33_SP6_E17.ab1	-	-	-	-	-	-	-	-	-	-	-	-	-	-
P1C34-PoL	34_SP6_E19.ab1	-	-	-	-	-	-	-	-	-	-	-	-	-	-
P1C35-PoL	35_SP6_E21.ab1	Uncharacterized protein Erythranthe guttata (Yellow monkey flower) (Mimulus guttatus)	2e-55	A0A022RVG8	po11_olive_000677	-	OE6A043412T1	Flagellar attachment zone protein 1	YES	YES	YES	-	-	-	-
P1C36-PoL	36_SP6_E23.ab1	Putative vacuole, catalytic-like Solanum chacoense (Chaco potato)	1e-100	A0A0V0I9W0	po11_olive_002021	-	OE6A031987T1	Protein ENHANCED DISEASE RESISTANCE 2-like	YES	YES	YES	-	-	-	-
P1C37-PoL	37_SP6_G01.ab1	-	-	-	po11_olive_002939	FACT complex subunit SPT16 Oryza sativa subsp. japonica (Rice)	OE6A004159T1	NifU-like protein 2, chloroplastic	YES	YES	YES	-	YES	YES	-
P1C38-PoL	38_SP6_G03.ab1	Peroxidase 44 Arabidopsis thaliana (Mouse-ear cress)	1e-24	Q93V93	po11_olive_003255	Uncharacterized protein Erythranthe guttata (Yellow monkey flower) (Mimulus guttatus)	OE6A057232T1	Peroxidase 5	YES	YES	YES	-	-	-	-
P1C39-PoL	39_SP6_G05.ab1	Probable protein kinase At2g41970 Arabidopsis thaliana (Mouse-ear cress)	3e-118	P93749	po11_olive_002719	Probable protein kinase At2g41970 Arabidopsis thaliana (Mouse-ear cress)	OE6A041431T1	Probable protein kinase At2g41970	YES	YES	YES	-	-	YES	-
P1C40-PoL	40_SP6_G07.ab1	-	-	-	-	-	-	-	-	-	-	-	-	-	-
P1C41-PoL	41_SP6_G09.ab1	-	-	-	-	-	-	-	-	-	-	-	-	-	-
P1C42-PoL	42_SP6_G11.ab1	-	-	-	-	-	-	-	-	-	-	-	-	-	-
P1C43-PoL	43_SP6_G13.ab1	Uncharacterized protein Morus notabilis.	4e-09	W9RL15	po11_olive_005117	-	OE6A040144T1	G-type lectin S-receptor-like serine/threonine-protein kinase At1g11330	YES	YES	YES	-	-	-	-
P1C44-PoL	44_SP6_G15.ab1	-	-	-	po11_olive_000149	Receptor-like protein kinase ANXUR1 Arabidopsis thaliana (Mouse-ear cress)	OE6A084904T1	Receptor-like protein kinase ANXUR1	YES	YES	YES	-	-	YES	-
P1C45-PoL	45_SP6_G17.ab1	Anther-specific protein LAT52 Solanum lycopersicum (Tomato) (Lycopersicon esculentum)	6e-08	P13447	po11_olive_006259	Anther-specific protein LAT52 Solanum lycopersicum (Tomato) (Lycopersicon esculentum)	OE6A111542T1	Anther-specific protein LAT52	-	-	-	-	-	-	-
P1C46-PoL	46_SP6_G19.ab1	Peroxidase 44 Arabidopsis thaliana (Mouse-ear cress)	1e-24	Q93V93	po11_olive_003255	Uncharacterized protein Erythranthe guttata (Yellow monkey flower) (Mimulus guttatus)	OE6A057232T1	Peroxidase 5	YES	YES	YES	-	-	-	-
P1C47-PoL	47_SP6_G21.ab1	Calcium-dependent protein kinase 14 Oryza sativa subsp. japonica (Rice)	0	B9FKW9	po11_olive_000917	Calcium-dependent protein kinase 17 Arabidopsis thaliana (Mouse-ear cress)	OE6A034492T1	Calcium-dependent protein kinase 17	YES	YES	YES	-	-	YES	-
P1C48-PoL	48_SP6_G23.ab1	-	-	-	po11_olive_005869	U-box domain-containing protein 34 Arabidopsis thaliana (Mouse-ear cress)	OE6A047406T1	U-box domain-containing protein 52	YES	YES	YES	-	-	-	-
P1C49-PoL	49_SP6_I01.ab1	-	-	-	po11_olive_000309	Cation/H(+) antiporter 18 Arabidopsis thaliana (Mouse-ear cress)	OE6A044950T4	Cation/H(+) antiporter 18	YES	YES	YES	-	YES	-	-
P1C50-PoL	50_SP6_I03.ab1	-	-	-	po11_olive_000299	Cation/H(+) antiporter 15 Arabidopsis thaliana (Mouse-ear cress)	OE6A034346T1	Cation/H(+) antiporter 15	YES	YES	YES	-	-	-	-
P1C51-PoL	51_SP6_I05.ab1	-	-	-	-	-	-	-	-	-	-	-	-	-	-
P1C52-PoL	52_SP6_I07.ab1	Plasma membrane ATPase Coffea canephora (Robusta coffee)	1e-114	A0A068V0H9	po11_olive_000283	ATPase 8, plasma membrane-type Arabidopsis thaliana (Mouse-ear cress)	OE6A049241T1	ATPase 8, plasma membrane-type	YES	YES	YES	-	-	YES	-
P1C53-PoL	53_SP6_I09.ab1	-	-	-	po11_olive_003801	Uncharacterized protein Solanum tuberosum (Potato)	OE6A003630T1	DNA double-strand break repair Rad50 ATPase	YES	YES	YES	-	-	-	-
P1C54-PoL	54_SP6_I11.ab1	-	-	-	-	-	-	-	-	-	-	-	-	-	-
P1C55-PoL	55_SP6_I13.ab1	-	-	-	-	-	-	-	-	-	-	-	-	-	-
P1C56-PoL	56_SP6_I15.ab1	Anther-specific protein LAT52 Solanum lycopersicum (Tomato) (Lycopersicon esculentum)	0	P13447	po11_olive_026411	Allergen Fra e 1 Fraxinus excelsior (European ash)	OE6A100852T1	Major pollen allergen Lig v 1	-	-	-	-	-	-	-
P1C57-PoL	57_SP6_I17.ab1	-	-	-	po11_olive_004145	Pollen-specific leucine-rich repeat extensin-like protein 1 Arabidopsis thaliana (Mouse-ear cress)	OE6A060809T1	Pollen-specific leucine-rich repeat extensin-like protein 1	-	-	-	-	-	-	-
P1C58-PoL	58_SP6_I19.ab1	-	-	-	po11_olive_002951	-	OE6A021657T3	Light-sensor Protein kinase	YES	-	-	-	-	-	-
P1C59-PoL	59_SP6_I21.ab1	-	-	-	po11_olive_005869	U-box domain-containing protein 34 Arabidopsis thaliana (Mouse-ear cress)	OE6A047406T1	U-box domain-containing protein 52	YES	YES	YES	-	-	YES	-
P1C60-PoL	60_SP6_I23.ab1	-	-	-	-	-	-	-	-	-	-	-	-	-	-
P1C61-PoL	61_SP6_K01.ab1	-	-	-	po11_olive_000255	Beta-galactosidase 13 Arabidopsis thaliana (Mouse-ear cress)	OE6A040870T1	Beta-galactosidase 13	YES	YES	YES	-	YES	-	-
P1C62-PoL	62_SP6_K03.ab1	Syntaxin-124 Arabidopsis thaliana (Mouse-ear cress)	1e-127	O64791	po11_olive_004649	Syntaxin-124 Arabidopsis thaliana (Mouse-ear cress)	OE6A073917T1	Syntaxin-124	YES	YES	-	-	-	-	-
P1C63-PoL	63_SP6_K05.ab1	Putative ovule protein Solanum chacoense (Chaco potato)	5e-53	A0A0V0IH68	po11_olive_002057	-	OE6A088096T1	GDSL esterase/lipase At3g48460	YES	YES	YES	-	YES	YES	-
P1C64-PoL	64_SP6_K07.ab1	Delta(12)-acyl-lipid-desaturase Punica granatum (Pomegranate)	1e-73	Q84VT2	po11_olive_002339	Omega-6 fatty acid desaturase, endoplasmic reticulum isozyme 2 Glycine max (Soybean) (Glycine hispida)	OE6A067271T1	Omega-6 fatty acid desaturase, endoplasmic reticulum isozyme 2	YES	YES	YES	YES	YES	-	-
P1C65-PoL	65_SP6_K09.ab1	-	-	-	-	-	-	-	-	-	-	-	-	-	-
P1C66-PoL	66_SP6_K11.ab1	-	-	-	-	-	-	-	-	-	-	-	-	-	-
P1C67-PoL	67_SP6_K13.ab1	Uncharacterized protein Daucus carota subsp. sativus.	0.015	A0A162ARG7	po11_olive_011945	Uncharacterized protein Erythranthe guttata (Yellow monkey flower) (Mimulus guttatus)	OE6A017855T1	Plasma membrane ATPase 4	YES	YES	YES	-	-	-	-
P1C68-PoL	68_SP6_K15.ab1	Polygalacturonase Gossypium barbadense (Sea-island cotton) (Egyptian cotton)	7e-48	Q39766	po11_olive_003205	Polygalacturonase Hypericum perforatum (St. John's wort)	OE6A111274T1	Exopolygalacturonase clone GBGA483	YES	YES	YES	-	-	YES	-
P1C69-PoL	69_SP6_K17.ab1	Polcalcin Ole e 3 Olea europaea (Common olive)	3e-53	O81092	po11_olive_026434	Polcalcin Ole e 3 Olea europaea (Common olive)	OE6A021191T3	Proline-rich receptor-like protein kinase PERK13	YES	YES	YES	-	-	-	YES
P1C70-PoL	70_SP6_K19.ab1	Clathrin light chain 1 Arabidopsis thaliana (Mouse-ear cress)	7e-37	Q9SKU1	po11_olive_006241	Clathrin light chain 1 Arabidopsis thaliana (Mouse-ear cress)	OE6A102650T1	Clathrin light chain 1	-	-	YES	-	-	-	-
P1C71-PoL	71_SP6_K21.ab1	-	-	-	po11_olive_012679	-	-	-	YES	YES	YES	-	YES	YES	-
P1C72-PoL	72_SP6_K23.ab1	Polcalcin Ole e 3 Olea europaea (Common olive)	5e-54	O81092	po11_olive_021619	Polcalcin Ole e 3 Olea europaea (Common olive)	OE6A021191T3	Proline-rich receptor-like protein kinase PERK13	YES	YES	YES	-	-	-	YES
P1C73-PoL	73_SP6_M01.ab1	Subtilisin-like protease SBT3.2 Arabidopsis thaliana (Mouse-ear cress)	2e-60	Q9MAP4	po11_olive_000371	Subtilisin-like protease SBT3.3 Arabidopsis thaliana (Mouse-ear cress)	OE6A093401T1	Alpha-L-arabinofuranosidase 1	YES	YES	YES	-	-	-	-
P1C74-PoL	74_SP6_M03.ab1	-	-	-	po11_olive_011195	Uncharacterized protein Erythranthe guttata (Yellow monkey flower) (Mimulus guttatus)	OE6A033582T1	ATP-dependent Clp protease proteolytic subunit 4, chloroplastic	-	-	-	-	-	-	-
P1C75-PoL	75_SP6_M05.ab1	-	-	-	po11_olive_012679	-	-	-	YES	YES	YES	-	YES	YES	-
P1C76-PoL	76_SP6_M07.ab1	Cytochrome b561 and DOMON domain-containing protein At3g25290 Arabidopsis thaliana (Mouse-ear cress)	3e-23	Q9LSE7	po11_olive_001781	Cytochrome b561 and DOMON domain-containing protein At3g25290 Arabidopsis thaliana (Mouse-ear cress)	OE6A014721T2	Auxin-induced in root cultures protein 12	YES	YES	YES	-	-	-	-
P1C77-PoL	77_SP6_M09.ab1	Probable xyloglucan endotransglucosylase/hydrolase protein 30 Arabidopsis thaliana (Mouse-ear cress)	1e-77	Q38908	po11_olive_008387	Probable xyloglucan endotransglucosylase/hydrolase protein 30 Arabidopsis thaliana (Mouse-ear cress)	OE6A021813T1	Probable xyloglucan endotransglucosylase/hydrolase protein 30	YES	YES	YES	-	-	-	-
P1C78-PoL	78_SP6_M11.ab1	Uncharacterized protein Erythranthe guttata (Yellow monkey flower) (Mimulus guttatus)	0	A0A022RJ02	-	-	-	-	-	-	-	-	-	-	-
P1C79-PoL	79_SP6_M13.ab1	Endoglucanase 16 Arabidopsis thaliana (Mouse-ear cress)	3e-67	Q8VYG3	po11_olive_000017	Endoglucanase 16 Arabidopsis thaliana (Mouse-ear cress)	OE6A090941T1	Endoglucanase 16	YES	YES	YES	-	-	-	-
P1C80-PoL	80_SP6_M15.ab1	Probable galacturonosyltransferase-like 4 Arabidopsis thaliana (Mouse-ear cress)	5e-73	Q9M8J2	po11_olive_004171	Probable galacturonosyltransferase-like 4 Arabidopsis thaliana (Mouse-ear cress)	OE6A043310T1	Probable galacturonosyltransferase-like 4	YES	YES	YES	-	-	YES	-
P1C81-PoL	81_SP6_M17.ab1	Uncharacterized protein Capsella rubella.	0.002	R0G2X7	po11_olive_024568	-	OE6A038893T1	Ubiquitin receptor RAD23b	YES	YES	YES	-	-	-	-
P1C82-PoL	82_SP6_M19.ab1	-	-	-	po11_olive_000027_split_1	ATPase 8, plasma membrane-type Arabidopsis thaliana (Mouse-ear cress)	OE6A024275T2	ATPase 8, plasma membrane-type	YES	YES	YES	-	-	-	-
P1C83-PoL	83_SP6_M21.ab1	-	-	-	po11_olive_000951	Pectinesterase Erythranthe guttata (Yellow monkey flower) (Mimulus guttatus)	OE6A071540T1	Pectinesterase 4	YES	YES	YES	-	-	-	-
P1C84-PoL	84_SP6_M23.ab1	-	-	-	-	-	-	-	-	-	-	-	-	-	-
P1C85-PoL	85_SP6_O01.ab1	-	-	-	po11_olive_005625	-	OE6A027166T6	Ubiquitin-conjugating enzyme E2 35	-	-	-	YES	YES	YES	-
P1C86-PoL	86_SP6_O03.ab1	Uncharacterized protein Coffea canephora (Robusta coffee)	9e-15	A0A068UXJ4	po11_olive_015019	Coffea canephora DH200=94 genomic scaffold, scaffold_72 Coffea canephora (Robusta coffee)	-	-	YES	YES	YES	-	-	-	-
P1C87-PoL	87_SP6_O05.ab1	-	-	-	-	-	-	-	-	-	-	-	-	-	-
P1C88-PoL	88_SP6_O07.ab1	Uncharacterized membrane protein At4g09580 Arabidopsis thaliana (Mouse-ear cress)	2e-40	Q8L586	po11_olive_008873	Uncharacterized membrane protein At4g09580 Arabidopsis thaliana (Mouse-ear cress)	OE6A108131T3	Uncharacterized membrane protein At4g09580	-	-	-	-	-	-	-
P1C89-PoL	89_SP6_O09.ab1	-	-	-	po11_olive_000697	Serine/threonine-protein kinase PBS1 Arabidopsis thaliana (Mouse-ear cress)	OE6A060886T1	Serine/threonine-protein kinase PBS1	YES	YES	YES	-	-	YES	-
P1C90-PoL	90_SP6_O11.ab1	-	-	-	-	-	-	-	-	-	-	-	-	-	-
P1C91-PoL	91_SP6_O13.ab1	-	-	-	po11_olive_005869	U-box domain-containing protein 34 Arabidopsis thaliana (Mouse-ear cress)	OE6A047406T1	U-box domain-containing protein 52	YES	YES	YES	-	-	-	-
P1C92-PoL	92_SP6_O15.ab1	-	-	-	po11_olive_004273	Uncharacterized protein Erythranthe guttata (Yellow monkey flower) (Mimulus guttatus)	OE6A065664T1	Lipase member N	YES	YES	YES	-	YES	-	-
P1C93-PoL	93_SP6_O17.ab1	-	-	-	po11_olive_000299	Cation/H(+) antiporter 15 Arabidopsis thaliana (Mouse-ear cress)	OE6A034346T2	Cation/H(+) antiporter 15	YES	YES	YES	-	-	YES	-
P1C94-PoL	94_SP6_O19.ab1	Uncharacterized protein Prunus persica (Peach) (Amygdalus persica)	3e-56	M5WLJ5	po11_olive_010383	Polyol transporter 5 Arabidopsis thaliana (Mouse-ear cress)	OE6A089393T1	Polyol transporter 5	YES	YES	YES	-	YES	YES	-
P1C95-PoL	95_SP6_O21.ab1	-	-	-	-	-	-	-	-	-	-	-	-	-	-
P1C96-PoL	96_SP6_O23.ab1	-	-	-	-	-	-	-	-	-	-	-	-	-	-
P1C97-PoL	1_SP6_B01.ab1	-	-	-	po11_olive_000027_split_1	ATPase 8, plasma membrane-type Arabidopsis thaliana (Mouse-ear cress)	OE6A024275T3	ATPase 8, plasma membrane-type	YES	YES	YES	-	YES	-	-
P1C98-PoL	2_SP6_B03.ab1	-	-	-	po11_olive_010073	-	OE6A102085T1	1-aminocyclopropane-1-carboxylate oxidase homolog 11	YES	YES	YES	-	-	-	-
P1C99-PoL	3_SP6_B05.ab1	-	-	-	po11_olive_000997	2 of Probable pectinesterase/pectinesterase inhibitor 25 Arabidopsis thaliana GN=PME25	OE6A085858T1	Putative pectinesterase/pectinesterase inhibitor 45	YES	YES	YES	-	-	-	-
P1C100-PoL	4_SP6_B07.ab1	Sphingolipid delta(4)-desaturase DES1-like Arabidopsis thaliana (Mouse-ear cress)	3e-91	Q9ZPH4	po11_olive_002193	Sphingolipid delta(4)-desaturase DES1-like Oryza sativa subsp. japonica (Rice)	OE6A026807T1	Sphingolipid delta(4)-desaturase DES1	YES	-	-	-	-	-	-
P1C101-PoL	5_SP6_B09.ab1	-	-	-	-	-	-	-	-	-	-	-	-	-	-
P1C102-PoL	6_SP6_B11.ab1	-	-	-	po11_olive_003587	Succinate dehydrogenase [ubiquinone] flavoprotein subunit 1, mitochondrial Arabidopsis thaliana (Mouse-ear cress)	OE6A068395T1	Succinate dehydrogenase [ubiquinone] flavoprotein subunit 1, mitochondrial	YES	YES	YES	YES	YES	YES	-
P1C103-PoL	7_SP6_B13.ab1	-	-	-	po11_olive_002033	Omega-6 fatty acid desaturase, endoplasmic reticulum isozyme 2 Glycine max (Soybean) (Glycine hispida)	OE6A069627T1	Omega-6 fatty acid desaturase, endoplasmic reticulum isozyme 2	YES	YES	YES	-	-	YES	-
P1C104-PoL	8_SP6_B15.ab1	-	-	-	po11_olive_000004	ATPase 8, plasma membrane-type Arabidopsis thaliana (Mouse-ear cress)	OE6A024275T3	ATPase 8, plasma membrane-type	YES	YES	YES	YES	YES	-	-
P1C105-PoL	9_SP6_B17.ab1	-	-	-	po11_olive_000299	Cation/H(+) antiporter 15 Arabidopsis thaliana (Mouse-ear cress)	OE6A034346T2	Cation/H(+) antiporter 15	YES	YES	YES	-	-	YES	-
P1C106-PoL	10_SP6_B19.ab1	Probable pectate lyase P59 Solanum lycopersicum (Tomato) (Lycopersicon esculentum)	1e-68	P15722	po11_olive_000030	Probable pectate lyase P59 Solanum lycopersicum (Tomato) (Lycopersicon esculentum)	OE6A095129T1	Probable pectate lyase P59	YES	YES	YES	-	-	-	-
P1C107-PoL	11_SP6_B21.ab1	-	-	-	-	-	-	-	-	-	-	-	-	-	-
P1C108-PoL	12_SP6_B23.ab1	Carbonic anhydrase, chloroplastic Spinacia oleracea (Spinach)	6e-97	P16016	po11_olive_003895	Carbonic anhydrase, chloroplastic Nicotiana tabacum (Common tobacco)	OE6A084575T1	Carbonic anhydrase, chloroplastic	YES	YES	YES	-	-	-	-
P1C109-PoL	13_SP6_D01.ab1	Pathogenesis-related protein 1C Nicotiana tabacum (Common tobacco)	1e-11	P09042	po11_olive_005997	Uncharacterized protein Solanum tuberosum (Potato)	-	-	YES	YES	YES	-	-	-	-
P1C110-PoL	14_SP6_D03.ab1	-	-	-	po11_olive_004481	-	OE6A019012T2	Kynurenine formamidase	YES	YES	YES	-	-	-	-
P1C111-PoL	15_SP6_D05.ab1	-	-	-	po11_olive_002339	Omega-6 fatty acid desaturase, endoplasmic reticulum isozyme 2 Glycine max (Soybean) (Glycine hispida)	OE6A067271T1	Omega-6 fatty acid desaturase, endoplasmic reticulum isozyme 2	YES	YES	YES	YES	-	YES	-
P1C112-PoL	16_SP6_D07.ab1	Pectate lyase Lilium longiflorum (Trumpet lily)	7e-39	P40973	po11_olive_001849	Pectate lyase Lilium longiflorum (Trumpet lily)	OE6A101696T1	Pectate lyase	YES	YES	YES	-	YES	YES	-
P1C113-PoL	17_SP6_D09.ab1	Putative uncharacterized protein Vitis vinifera (Grape)	5e-47	A5BTS4	po11_olive_003097	Putative uncharacterized protein Vitis vinifera (Grape)	-	-	YES	YES	YES	-	-	-	-
P1C114-PoL	18_SP6_D11.ab1	Uncharacterized protein Erythranthe guttata (Yellow monkey flower) (Mimulus guttatus)	1e-28	A0A022QLS2	po11_olive_010783	Coffea canephora DH200=94 genomic scaffold, scaffold_3 Coffea canephora (Robusta coffee)	OE6A060063T1	Probable pectinesterase/pectinesterase inhibitor 25	YES	YES	-	-	-	-	-
P1C115-PoL	19_SP6_D13.ab1	-	-	-	-	-	-	-	-	-	-	-	-	-	-
P1C116-PoT	20_SP6_D15.ab1	Probable serine/threonine-protein kinase PBL5 Arabidopsis thaliana (Mouse-ear cress)	2e-101	Q9LQQ8	po11_olive_002597	Probable serine/threonine-protein kinase RLCKVII Arabidopsis thaliana (Mouse-ear cress)	OE6A104350T3	Probable serine/threonine-protein kinase RLCKVII	YES	YES	YES	YES	YES	-	-
P1C117-PoL	21_SP6_D17.ab1	-	-	-	po11_olive_005869	U-box domain-containing protein 34 Arabidopsis thaliana (Mouse-ear cress)	OE6A047406T1	U-box domain-containing protein 52	YES	YES	YES	-	-	YES	-
P1C118-PoL	22_SP6_D19.ab1	Sugar transport protein 8 Arabidopsis thaliana (Mouse-ear cress)	7e-78	Q9SBA7	po11_olive_001591	Sugar transport protein 8 Arabidopsis thaliana (Mouse-ear cress)	OE6A049149T1	Sugar transport protein 8	YES	YES	YES	-	-	-	-
P1C119-PoL	23_SP6_D21.ab1	-	-	-	po11_olive_000028	Sugar transport protein 2 Arabidopsis thaliana (Mouse-ear cress)	OE6A082174T1	Sugar transport protein 8	YES	YES	YES	-	-	YES	-
P1C120-PoL	24_SP6_D23.ab1	-	-	-	po11_olive_002019	Uncharacterized protein Erythranthe guttata (Yellow monkey flower) (Mimulus guttatus)	-	-	-	YES	YES	-	-	-	-
P1C121-PoL	25_SP6_F01.ab1	-	-	-	-	-	-	-	-	-	-	-	-	-	-
P1C122-PoL	26_SP6_F03.ab1	-	-	-	po11_olive_000731	Putative clathrin assembly protein At1g03050 Arabidopsis thaliana (Mouse-ear cress)	OE6A070422T1	Putative clathrin assembly protein At1g03050	YES	YES	YES	-	-	-	-
P1C123-PoL	27_SP6_F05.ab1	-	-	-	-	-	-	-	-	-	-	-	-	-	-
P1C124-PoL	28_SP6_F07.ab1	-	-	-	-	-	-	-	-	-	-	-	-	-	-
P1C125-PoL	29_SP6_F09.ab1	-	-	-	-	-	-	-	-	-	-	-	-	-	-
P1C126-PoL	30_SP6_F11.ab1	CBL-interacting serine/threonine-protein kinase 11 Arabidopsis thaliana (Mouse-ear cress)	2e-97	O22932	po11_olive_002505	CBL-interacting serine/threonine-protein kinase 11 Arabidopsis thaliana (Mouse-ear cress)	OE6A025932T1	CBL-interacting serine/threonine-protein kinase 11	YES	YES	YES	-	-	-	-
P1C127-PoL	31_SP6_F13.ab1	Probable potassium channel AKT5 Arabidopsis thaliana (Mouse-ear cress)	0	Q9SCX5	po11_olive_000161	Potassium channel AKT1 Arabidopsis thaliana (Mouse-ear cress)	OE6A096212T2	Potassium channel AKT1	YES	YES	YES	YES	YES	-	-
P1C128-PoL	32_SP6_F15.ab1	Polygalacturonase Nicotiana tabacum (Common tobacco)	3e-38	Q05967	po11_olive_004597	-	OE6A103939T1	Exopolygalacturonase clone GBGE184	YES	YES	YES	-	-	-	-
P1C129-PoL	33_SP6_F17.ab1	Uncharacterized protein Erythranthe guttata (Yellow monkey flower) (Mimulus guttatus)	1e-33	A0A022RGP7	po11_olive_000307	Coffea canephora DH200=94 genomic scaffold, scaffold_12 Coffea canephora (Robusta coffee)	OE6A057009T5	Putative general negative regulator of transcription C16C9.04c	-	-	-	-	-	-	-
P1C130-PoL	34_SP6_F19.ab1	-	-	-	-	-	-	-	-	-	-	-	-	-	-
P1C131-PoL	35_SP6_F21.ab1	-	-	-	po11_olive_012341	-	-	-	YES	YES	YES	-	YES	YES	-
P1C132-PoL	36_SP6_F23.ab1	-	-	-	-	-	-	-	-	-	-	-	-	-	-
P1C133-PoL	37_SP6_H01.ab1	-	-	-	po11_olive_000263	U-box domain-containing protein 34 Arabidopsis thaliana (Mouse-ear cress)	OE6A047406T1	U-box domain-containing protein 52	YES	YES	YES	-	-	-	-
P1C134-PoL	38_SP6_H03.ab1	-	-	-	po11_olive_001071	Probable pectate lyase P59 Solanum lycopersicum (Tomato) (Lycopersicon esculentum)	OE6A095129T1	Probable pectate lyase P59	YES	YES	YES	-	YES	YES	-
P1C135-PoL	39_SP6_H05.ab1	-	-	-	po11_olive_000437	Sugar transport protein 8 Arabidopsis thaliana (Mouse-ear cress)	OE6A114410T2	Late embryogenesis abundant protein D-29	YES	YES	YES	-	-	-	-
P1C136-PoL	40_SP6_H07.ab1	-	-	-	po11_olive_006667	Uncharacterized protein Solanum lycopersicum (Tomato) (Lycopersicon esculentum)	OE6A091303T1	Aminopeptidase N	YES	YES	YES	-	-	-	-
P1C137-PoL	41_SP6_H09.ab1	-	-	-	po11_olive_000100	L-ascorbate oxidase homolog Brassica napus (Rape)	OE6A036630T1	L-ascorbate oxidase homolog	YES	YES	YES	-	YES	YES	-
P1C138-PoL	42_SP6_H11.ab1	-	-	-	-	-	-	-	-	-	-	-	-	-	-
P1C139-PoL	43_SP6_H13.ab1	-	-	-	po11_olive_001001	Uncharacterized protein Solanum tuberosum (Potato)	OE6A116313T1	Galactose oxidase	YES	YES	YES	-	-	-	-
P1C140-PoL	44_SP6_H15.ab1	Calcium-binding protein CAST Solanum tuberosum (Potato)	2e-61	Q09011	po11_olive_013677	Calcium-binding protein CAST Solanum tuberosum (Potato)	OE6A057599T1	Calcium-binding protein CAST	YES	YES	YES	YES	-	YES	YES
P1C141-PoL	45_SP6_H17.ab1	-	-	-	po11_olive_002933	-	OE6A026293T1	Lipid phosphate phosphatase delta	YES	YES	YES	-	-	YES	-
P1C142-PoL	46_SP6_H19.ab1	Sugar transport protein 11 Arabidopsis thaliana (Mouse-ear cress)	8e-50	Q9FMX3	po11_olive_000707	Sugar transport protein 10 Arabidopsis thaliana (Mouse-ear cress)	OE6A047120T1	Sugar transport protein 10	YES	YES	YES	-	-	-	-
P1C143-PoL	47_SP6_H21.ab1	Uncharacterized protein Erythranthe guttata (Yellow monkey flower) (Mimulus guttatus)	3e-74	A0A022QAA7	po11_olive_003029	Uncharacterized protein Jatropha curcas (Barbados nut)	OE6A031186T1	Uncharacterized protein At2g34160	YES	YES	YES	-	-	-	-
P1C144-PoL	48_SP6_H23.ab1	-	-	-	po11_olive_016117	L-ascorbate oxidase homolog Nicotiana tabacum (Common tobacco)	OE6A066907T1	L-ascorbate oxidase homolog	YES	YES	YES	YES	YES	YES	-
P1C145-PoL	49_SP6_J01.ab1	-	-	-	-	-	-	-	-	-	-	-	-	-	-
P1C146-PoL	50_SP6_J03.ab1	Tubby-like F-box protein 5 Oryza sativa subsp. japonica (Rice)	5e-34	Q6Z2G9	po11_olive_000785	Tubby-like F-box protein 5 Oryza sativa subsp. japonica (Rice)	OE6A078386T3	Tubby-like F-box protein 5	YES	YES	YES	-	-	-	-
P1C147-PoL	51_SP6_J05.ab1	-	-	-	po11_olive_006986	-	OE6A117572T1	GDSL esterase/lipase At5g33370	-	-	-	-	-	-	-
P1C148-PoL	52_SP6_J07.ab1	-	-	-	po11_olive_002603	Serine/threonine-protein kinase At3g07070 Arabidopsis thaliana (Mouse-ear cress)	OE6A034436T1	Serine/threonine-protein kinase PBS1	YES	YES	YES	-	-	-	-
P1C149-PoL	53_SP6_J09.ab1	-	-	-	po11_olive_000028	Sugar transport protein 2 Arabidopsis thaliana (Mouse-ear cress)	OE6A082174T1	Sugar transport protein 8	YES	YES	YES	-	-	YES	-
P1C150-PoL	54_SP6_J11.ab1	Phosphatidylinositol 4-kinase gamma 1 Arabidopsis thaliana (Mouse-ear cress)	3e-16	O22199	po11_olive_000421	Phosphatidylinositol 4-kinase gamma 1 Arabidopsis thaliana (Mouse-ear cress)	OE6A062874T3	Phosphatidylinositol 4-kinase gamma 1	YES	YES	YES	-	-	-	-
P1C151-PoL	55_SP6_J13.ab1	-	-	-	-	-	-	-	-	-	-	-	-	-	-
P1C152-PoL	56_SP6_J15.ab1	-	-	-	-	-	-	-	-	-	-	-	-	-	-
P1C153-PoL	57_SP6_J17.ab1	Probable polygalacturonase Vitis vinifera (Grape)	1e-67	A7PZL3	po11_olive_002407	Probable polygalacturonase Vitis vinifera (Grape)	OE6A059288T1	Probable polygalacturonase	YES	YES	YES	-	-	-	-
P1C154-PoL	58_SP6_J19.ab1	-	-	-	po11_olive_000909	Coffea canephora DH200=94 genomic scaffold, scaffold_3 Coffea canephora (Robusta coffee)	OE6A009288T1	Exopolygalacturonase	YES	YES	YES	-	-	-	-
P1C155-PoL	59_SP6_J21.ab1	-	-	-	po11_olive_022680	-	-	-	-	YES	-	-	-	-	-
P1C156-PoL	60_SP6_J23.ab1	Tubulin alpha-2 chain Gossypium hirsutum (Upland cotton) (Gossypium mexicanum)	1e-128	Q6VAG0	po11_olive_000244	Tubulin alpha-2 chain Chlamydomonas reinhardtii (Chlamydomonas smithii)	OE6A054066T1	Tubulin alpha chain	YES	YES	YES	-	-	-	-
P1C157-PoL	61_SP6_L01.ab1	-	-	-	-	-	-	-	-	-	-	-	-	-	-
P1C158-PoL	62_SP6_L03.ab1	Novel plant SNARE 11 Arabidopsis thaliana (Mouse-ear cress)	3e-62	Q944A9	po11_olive_005143	Novel plant SNARE 11 Arabidopsis thaliana (Mouse-ear cress)	OE6A116444T1	Novel plant SNARE 11	YES	YES	YES	YES	YES	-	-
P1C159-PoL	63_SP6_L05.ab1	-	-	-	-	-	-	-	-	-	-	-	-	-	-
P1C160-PoL	64_SP6_L07.ab1	Allergen Fra e 1 Fraxinus excelsior (European ash)	1e-65	Q6U740	po11_olive_004279	Allergen Fra e 1 Fraxinus excelsior (European ash)	OE6A083939T1	Major pollen allergen Ole e 1	YES	YES	YES	YES	YES	YES	-
P1C161-PoL	65_SP6_L09.ab1	Uncharacterized protein Erythranthe guttata (Yellow monkey flower) (Mimulus guttatus)	2e-61	A0A022QDG1	po11_olive_010445	Uncharacterized protein Erythranthe guttata (Yellow monkey flower) (Mimulus guttatus)	OE6A059848T1	Centromere protein S	YES	YES	YES	-	-	YES	-
P1C162-PoL	66_SP6_L11.ab1	Uncharacterized protein Erythranthe guttata (Yellow monkey flower) (Mimulus guttatus)	2e-35	A0A022RIB5	po11_olive_023442	Uncharacterized protein Erythranthe guttata (Yellow monkey flower) (Mimulus guttatus)	OE6A114410T1	Late embryogenesis abundant protein D-29	-	-	-	-	-	-	-
P1C163-PoL	67_SP6_L13.ab1	Uncharacterized protein Erythranthe guttata (Yellow monkey flower) (Mimulus guttatus)	3e-48	A0A022QMB5	po11_olive_010983	Uncharacterized protein Erythranthe guttata (Yellow monkey flower) (Mimulus guttatus)	OE6A073918T1	Syntaxin-124	-	YES	YES	-	-	-	-
P1C164-PoL	68_SP6_L15.ab1	-	-	-	-	-	-	-	-	-	-	-	-	-	-
P1C165-PoL	69_SP6_L17.ab1	-	-	-	po11_olive_002951	-	OE6A021657T3	Light-sensor Protein kinase	YES	-	-	-	-	-	-
P1C166-PoL	70_SP6_L19.ab1	Thioredoxin H-type Populus jackii (Balm of Gilead) (Populus deltoides x Populus balsamifera)	9e-09	P85801	po11_olive_008287	Thioredoxin H-type Populus jackii (Balm of Gilead) (Populus deltoides x Populus balsamifera)	OE6A104292T1	Thioredoxin H-type	YES	YES	YES	-	-	-	-
P1C167-PoL	71_SP6_L21.ab1	-	-	-	po11_olive_012913	-	-	-	YES	YES	YES	-	YES	-	-
P1C168-PoL	72_SP6_L23.ab1	-	-	-	-	-	-	-	-	-	-	-	-	-	-
P1C169-PoL	73_SP6_N01.ab1	Pathogenesis-related protein PR-1 Medicago truncatula (Barrel medic) (Medicago tribuloides)	7e-15	Q40374	po11_olive_004695	SEC1 family transport protein SLY1 Arabidopsis thaliana (Mouse-ear cress)	OE6A096126T1	Pathogenesis-related protein 1C	YES	YES	YES	-	-	-	-
P1C170-PoL	74_SP6_N03.ab1	-	-	-	po11_olive_006175	Coffea canephora DH200=94 genomic scaffold, scaffold_35 Coffea canephora (Robusta coffee)	OE6A112325T1	Pollen-specific protein SF3	-	-	YES	-	-	-	-
P1C171-PoL	75_SP6_N05.ab1	Uncharacterized protein Morus notabilis.	9e-09	W9RL15	po11_olive_005117	-	OE6A040144T1	G-type lectin S-receptor-like serine/threonine-protein kinase At1g11330	YES	YES	YES	-	YES	-	-
P1C172-PoL	76_SP6_N07.ab1	Phosphatidylinositol 3,4,5-trisphosphate 3-phosphatase and protein-tyrosine-phosphatase PTEN1 Arabidopsis thaliana (Mouse-ear cress)	1e-37	Q9FLZ5	po11_olive_001521	Coffea canephora DH200=94 genomic scaffold, scaffold_8 Coffea canephora (Robusta coffee)	OE6A118184T1	Phosphatidylinositol 3,4,5-trisphosphate 3-phosphatase and dual-specificity protein phosphatase PTEN	YES	YES	YES	-	-	-	-
P1C173-PoL	77_SP6_N09.ab1	-	-	-	po11_olive_000147_split_0	Kinesin-like protein NACK1 Nicotiana tabacum (Common tobacco)	OE6A075073T4	Kinesin-like protein NACK1	YES	YES	YES	-	-	YES	-
P1C174-PoL	78_SP6_N11.ab1	-	-	-	po11_olive_000437	Sugar transport protein 8 Arabidopsis thaliana (Mouse-ear cress)	OE6A114410T2	Late embryogenesis abundant protein D-29	YES	YES	YES	-	-	-	-
P1C175-PoL	79_SP6_N13.ab1	-	-	-	po11_olive_000247	Probable serine/threonine-protein kinase At1g54610 Arabidopsis thaliana (Mouse-ear cress)	OE6A056500T2	Probable serine/threonine-protein kinase At1g54610	YES	YES	YES	-	-	-	-
P1C176-PoL	80_SP6_N15.ab1	-	-	-	-	-	-	-	-	-	-	-	-	-	-
P1C177-PoL	81_SP6_N17.ab1	-	-	-	-	-	-	-	-	-	-	-	-	-	-
P1C178-PoL	82_SP6_N19.ab1	-	-	-	po11_olive_000861	L-ascorbate oxidase homolog Nicotiana tabacum (Common tobacco)	OE6A066907T1	L-ascorbate oxidase homolog	YES	YES	YES	YES	-	-	-
P1C179-PoL	83_SP6_N21.ab1	-	-	-	po11_olive_017439	Coffea canephora DH200=94 genomic scaffold, scaffold_8 Coffea canephora (Robusta coffee)	OE6A103861T3	F-box protein At5g07610	-	-	-	-	-	-	-
P1C180-PoL	84_SP6_N23.ab1	-	-	-	-	-	-	-	-	-	-	-	-	-	-
P1C181-PoL	85_SP6_P01.ab1	-	-	-	-	-	-	-	-	-	-	-	-	-	-
P1C182-PoL	86_SP6_P03.ab1	-	-	-	po11_olive_005039	-	OE6A015639T1	Transcription factor bHLH155	YES	YES	YES	YES	YES	YES	-
P1C183-PoL	87_SP6_P05.ab1	-	-	-	po11_olive_001253	Calcium-dependent protein kinase 17 Arabidopsis thaliana (Mouse-ear cress)	OE6A063221T1	Calcium-dependent protein kinase 17	YES	YES	YES	-	-	YES	-
P1C184-PoL	88_SP6_P07.ab1	Allergen Fra e 1 Fraxinus excelsior (European ash)	5e-67	Q6U740	po11_olive_004279	Allergen Fra e 1 Fraxinus excelsior (European ash)	OE6A083939T1	Major pollen allergen Ole e 1	YES	YES	YES	YES	YES	YES	-
P1C185-PoL	89_SP6_P09.ab1	-	-	-	-	-	-	-	-	-	-	-	-	-	-
P1C186-PoL	90_SP6_P11.ab1	-	-	-	po11_olive_001283	Beta-fructofuranosidase, insoluble isoenzyme 1 Daucus carota (Wild carrot)	OE6A119047T1	Beta-fructofuranosidase, insoluble isoenzyme 1	YES	YES	YES	-	-	-	-
P1C187-PoL	91_SP6_P13.ab1	-	-	-	-	-	-	-	-	-	-	-	-	-	-
P1C188-PoL	92_SP6_P15.ab1	Expansin-A32 Oryza sativa subsp. japonica (Rice)	4e-48	Q6YYW5	po11_olive_005759	Expansin-A11 Oryza sativa subsp. japonica (Rice)	OE6A098852T1	Expansin-A32	YES	YES	YES	-	YES	YES	-
P1C189-PoL	93_SP6_P17.ab1	-	-	-	-	-	-	-	-	-	-	-	-	-	-
P1C190-PoL	94_SP6_P19.ab1	-	-	-	po11_olive_000421	Phosphatidylinositol 4-kinase gamma 1 Arabidopsis thaliana (Mouse-ear cress)	OE6A062874T3	Phosphatidylinositol 4-kinase gamma 1	YES	YES	YES	-	YES	-	-
P1C191-PoL	95_SP6_P21.ab1	Uncharacterized protein Cajanus cajan (Pigeon pea) (Cajanus indicus)	9e-09	A0A151TV21	po11_olive_010787	Putative uncharacterized protein Populus trichocarpa (Western balsam poplar) (Populus balsamifera subsp. trichocarpa)	-	-	YES	YES	YES	-	-	-	-
P1C192-PoL	96_SP6_P23.ab1	Expansin-A32 Oryza sativa subsp. japonica (Rice)	2e-47	Q6YYW5	po11_olive_005759	Expansin-A11 Oryza sativa subsp. japonica (Rice)	OE6A098852T1	Expansin-A32	YES	YES	YES	-	YES	YES	-
