# Supplementary material for: Identification and Functional Annotation of Genes Differentially Expressed in the Reproductive Tissues of the Olive Tree (Olea europaea L.) through the Generation of Subtractive Libraries
Source: Front Plant Sci. 2017 Sep 13;8:1576. doi: 10.3389/fpls.2017.01576 (PMC5601413; doi:10.3389/fpls.2017.01576)
Supplement: Supplementary file 10 [file Table10.XLSX]

## Sheet: Hoja1
P(Po)		FULL-LengtherNext ANNOTATION			REPROLIVE		CRUZ		BLAST WITH Roche/454 READS
Sample	Fastq_id	Description	e-value	Subject_id	pistil_transc_id	pistil_description	cruz_transc_id	cruz_description	pollen_mature	pollen_germ_1h	pollen_germ_5h30min	pistil_stage2	pistil_stage3	pistil_stage4	leaf			Rejected by SeqTrimNext
P1C1-PPo	polen-pistil-sp6_A01_01.ab1	-	-	-	-	-	-	-	-	-	-	-	-	-	-
P1C2-PPo	polen-pistil-sp6_A02_02.ab1	-	-	-	-	-	-	-	-	-	-	-	-	-	-
P1C3-PPo	polen-pistil-sp6_A03_01.ab1	-	-	-	-	-	-	-	-	-	-	-	-	-	-
P1C4-PPo	polen-pistil-sp6_A04_02.ab1	-	-	-	st11_olive_047187	-	OE6A027208T1	Probable xyloglucan endotransglucosylase/hydrolase protein 30	-	-	-	YES	YES	YES	-
P1C5-PPo	polen-pistil-sp6_A05_01.ab1	-	-	-	-	-	-	-	-	-	-	-	-	-	-
P1C6-PPo	polen-pistil-sp6_A06_02.ab1	-	-	-	-	-	-	-	-	-	-	-	-	-	-
P1C7-PPo	polen-pistil-sp6_A07_01.ab1	-	-	-	-	-	-	-	-	-	-	-	-	-	-
P1C8-PPo	polen-pistil-sp6_A08_02.ab1	-	-	-	-	-	-	-	-	-	-	-	-	-	-
P1C9-PPo	polen-pistil-sp6_A09_01.ab1	-	-	-	st11_olive_051444	-	OE6A105660T1	Cysteine proteinase inhibitor	-	-	-	-	-	YES	-
P1C10-PPo	polen-pistil-sp6_A10_02.ab1	-	-	-	-	-	-	-	-	-	-	-	-	-	-
P1C11-PPo	polen-pistil-sp6_A11_01.ab1	-	-	-	-	-	-	-	-	-	-	-	-	-	-
P1C12-PPo	polen-pistil-sp6_A12_02.ab1	-	-	-	-	-	-	-	-	-	-	-	-	-	-
P1C13-PPo	polen-pistil-sp6_B01_03.ab1	-	-	-	-	-	-	-	-	-	-	-	-	-	-
P1C14-PPo	polen-pistil-sp6_B02_04.ab1	Uncharacterized protein Solanum tuberosum (Potato)	5e-16	M1CMF7	st11_olive_000847	Coffea canephora DH200=94 genomic scaffold, scaffold_9 Coffea canephora (Robusta coffee)	OE6A082350T5	Probable alpha,alpha-trehalose-phosphate synthase [UDP-forming] 11	-	-	-	YES	-	YES	YES
P1C15-PPo	polen-pistil-sp6_B03_03.ab1	-	-	-	st11_olive_023407	Serine/threonine-protein kinase PBS1 Arabidopsis thaliana (Mouse-ear cress)	OE6A043277T1	Serine/threonine-protein kinase PBS1	-	-	-	YES	-	YES	-
P1C16-PPo	polen-pistil-sp6_B04_04.ab1	-	-	-	st11_olive_011037	-	OE6A013506T2	Prolyl-tRNA editing protein ProX	-	-	-	YES	-	YES	YES
P1C17-PPo	polen-pistil-sp6_B05_03.ab1	-	-	-	st11_olive_021107	Uncharacterized protein Erythranthe guttata (Yellow monkey flower) (Mimulus guttatus)	OE6A052001T3	Transcription factor bHLH47	-	-	-	YES	YES	YES	YES
P1C18-PPo	polen-pistil-sp6_B06_04.ab1	-	-	-	st11_olive_007889	Uncharacterized protein Erythranthe guttata (Yellow monkey flower) (Mimulus guttatus)	OE6A051600T4	Aldehyde dehydrogenase family 2 member C4	-	-	-	-	YES	YES	-
P1C19-PPo	polen-pistil-sp6_B07_03.ab1	-	-	-	-	-	-	-	-	-	-	-	-	-	-
P1C20-PPo	polen-pistil-sp6_B08_04.ab1	-	-	-	st11_olive_033317	Thaumatin-like protein Arabidopsis thaliana (Mouse-ear cress)	OE6A051451T1	Pathogenesis-related protein 5	-	-	-	YES	YES	YES	-
P1C21-PPo	polen-pistil-sp6_B09_03.ab1	-	-	-	-	-	-	-	-	-	-	-	-	-	-
P1C22-PPo	polen-pistil-sp6_B10_04.ab1	-	-	-	st11_olive_000236	Beta-glucosidase 14 Arabidopsis thaliana (Mouse-ear cress)	OE6A014603T8	Raucaffricine-O-beta-D-glucosidase	-	-	-	YES	YES	YES	YES
P1C23-PPo	polen-pistil-sp6_B11_03.ab1	-	-	-	st11_olive_006513	Uncharacterized protein Jatropha curcas (Barbados nut)	OE6A087160T2	Transaldolase	-	-	-	YES	YES	YES	YES
P1C24-PPo	polen-pistil-sp6_B12_04.ab1	-	-	-	-	-	-	-	-	-	-	-	-	-	-
P1C25-PPo	polen-pistil-sp6_C01_05.ab1	-	-	-	-	-	-	-	-	-	-	-	-	-	-
P1C26-PPo	polen-pistil-sp6_C02_06.ab1	-	-	-	-	-	-	-	-	-	-	-	-	-	-
P1C27-PPo	polen-pistil-sp6_C03_05.ab1	-	-	-	-	-	-	-	-	-	-	-	-	-	-
P1C28-PPo	polen-pistil-sp6_C04_06.ab1	-	-	-	-	-	-	-	-	-	-	-	-	-	-
P1C29-PPo	polen-pistil-sp6_C05_05.ab1	-	-	-	-	-	-	-	-	-	-	-	-	-	-
P1C30-PPo	polen-pistil-sp6_C06_06.ab1	-	-	-	-	-	-	-	-	-	-	-	-	-	-
P1C31-PPo	polen-pistil-sp6_C07_05.ab1	-	-	-	st11_olive_024015	Caffeoyl-CoA O-methyltransferase Populus tremuloides (Quaking aspen)	OE6A059983T2	Caffeoyl-CoA O-methyltransferase	-	-	-	-	YES	YES	YES
P1C32-PPo	polen-pistil-sp6_C08_06.ab1	-	-	-	-	-	-	-	-	-	-	-	-	-	-
P1C33-PPo	polen-pistil-sp6_C09_05.ab1	-	-	-	st11_olive_019193	Probable WRKY transcription factor 33 Arabidopsis thaliana (Mouse-ear cress)	OE6A043605T1	Probable WRKY transcription factor 33	-	-	-	YES	YES	YES	YES
P1C34-PPo	polen-pistil-sp6_C10_06.ab1	-	-	-	-	-	-	-	-	-	-	-	-	-	-
P1C35-PPo	polen-pistil-sp6_C11_05.ab1	-	-	-	-	-	-	-	-	-	-	-	-	-	-
P1C36-PPo	polen-pistil-sp6_C12_06.ab1	Putative uncharacterized protein Vitis vinifera (Grape)	3e-07	A5AU95	st11_olive_003198	Putative uncharacterized protein Vitis vinifera (Grape)	OE6A013357T1	Probable methyltransferase PMT5	-	-	YES	-	-	YES	-
P1C37-PPo	polen-pistil-sp6_D01_07.ab1	-	-	-	-	-	-	-	-	-	-	-	-	-	-
P1C38-PPo	polen-pistil-sp6_D02_08.ab1	-	-	-	-	-	-	-	-	-	-	-	-	-	-
P1C39-PPo	polen-pistil-sp6_D03_07.ab1	-	-	-	st11_olive_051444	-	-	-	-	-	-	-	-	-	-
P1C40-PPo	polen-pistil-sp6_D04_08.ab1	-	-	-	st11_olive_030473	Uncharacterized protein Erythranthe guttata (Yellow monkey flower) (Mimulus guttatus)	OE6A031612T1	Dirigent protein 21	-	-	-	-	-	YES	-
P1C41-PPo	polen-pistil-sp6_D05_07.ab1	-	-	-	st11_olive_020515	Light-inducible protein CPRF2 Petroselinum crispum (Parsley) (Petroselinum hortense)	OE6A100369T1	Light-inducible protein CPRF2	-	-	-	-	YES	YES	-
P1C42-PPo	polen-pistil-sp6_D06_08.ab1	-	-	-	-	-	-	-	-	-	-	-	-	-	-
P1C43-PPo	polen-pistil-sp6_D07_07.ab1	-	-	-	-	-	-	-	-	-	-	-	-	-	-
P1C44-PPo	polen-pistil-sp6_D08_08.ab1	-	-	-	-	-	-	-	-	-	-	-	-	-	-
P1C45-PPo	polen-pistil-sp6_D09_07.ab1	-	-	-	-	-	-	-	-	-	-	-	-	-	-
P1C46-PPo	polen-pistil-sp6_D10_08.ab1	-	-	-	st11_olive_013883	Probable sugar phosphate/phosphate translocator At2g25520 Arabidopsis thaliana (Mouse-ear cress)	OE6A092404T1	Probable sugar phosphate/phosphate translocator At2g25520	-	-	-	-	YES	-	-
P1C47-PPo	polen-pistil-sp6_D11_07.ab1	-	-	-	-	-	-	-	-	-	-	-	-	-	-
P1C48-PPo	polen-pistil-sp6_D12_08.ab1	-	-	-	st11_olive_024881	GDSL esterase/lipase At4g28780 Arabidopsis thaliana (Mouse-ear cress)	OE6A114386T2	GDSL esterase/lipase LTL1	-	-	-	-	-	-	-
P1C49-PPo	polen-pistil-sp6_E01_09.ab1	-	-	-	-	-	-	-	-	-	-	-	-	-	-
P1C50-PPo	polen-pistil-sp6_E02_10.ab1	-	-	-	-	-	-	-	-	-	-	-	-	-	-
P1C51-PPo	polen-pistil-sp6_E03_09.ab1	-	-	-	st11_olive_011049	Putative uncharacterized protein Vitis vinifera (Grape)	OE6A052613T1	Geraniol 8-hydroxylase	-	-	-	YES	YES	YES	-
P1C52-PPo	polen-pistil-sp6_E04_10.ab1	-	-	-	-	-	-	-	-	-	-	-	-	-	-
P1C53-PPo	polen-pistil-sp6_E05_09.ab1	-	-	-	st11_olive_053362	Beta-glucosidase 24 Oryza sativa subsp. japonica (Rice)	OE6A014603T8	Raucaffricine-O-beta-D-glucosidase	-	-	-	YES	YES	YES	YES
P1C54-PPo	polen-pistil-sp6_E06_10.ab1	-	-	-	-	-	-	-	-	-	-	-	-	-	-
P1C55-PPo	polen-pistil-sp6_E07_09.ab1	-	-	-	-	-	-	-	-	-	-	-	-	-	-
P1C56-PPo	polen-pistil-sp6_E08_10.ab1	-	-	-	-	-	-	-	-	-	-	-	-	-	-
P1C57-PPo	polen-pistil-sp6_E09_09.ab1	-	-	-	-	-	-	-	-	-	-	-	-	-	-
P1C58-PPo	polen-pistil-sp6_E10_10.ab1	-	-	-	st11_olive_029971	GTP-binding nuclear protein Ran-3 Arabidopsis thaliana (Mouse-ear cress)	OE6A104766T1	GTP-binding nuclear protein Ran-A1	YES	YES	YES	YES	YES	YES	YES
P1C59-PPo	polen-pistil-sp6_E11_09.ab1	-	-	-	-	-	-	-	-	-	-	-	-	-	-
P1C60-PPo	polen-pistil-sp6_E12_10.ab1	-	-	-	-	-	-	-	-	-	-	-	-	-	-
P1C61-PPo	polen-pistil-sp6_F01_11.ab1	-	-	-	-	-	-	-	-	-	-	-	-	-	-
P1C62-PPo	polen-pistil-sp6_F02_12.ab1	-	-	-	-	-	-	-	-	-	-	-	-	-	-
P1C63-PPo	polen-pistil-sp6_F03_11.ab1	-	-	-	st11_olive_021805	Proteasome subunit alpha type-3 Spinacia oleracea (Spinach)	OE6A003673T3	Proteasome subunit alpha type-3	-	YES	-	YES	YES	YES	YES
P1C64-PPo	polen-pistil-sp6_F04_12.ab1	-	-	-	-	-	-	-	-	-	-	-	-	-	-
P1C65-PPo	polen-pistil-sp6_F05_11.ab1	-	-	-	-	-	-	-	-	-	-	-	-	-	-
P1C66-PPo	polen-pistil-sp6_F06_12.ab1	-	-	-	st11_olive_051444	-	OE6A046507T1	Cysteine proteinase inhibitor	-	-	-	-	-	-	-
P1C67-PPo	polen-pistil-sp6_F07_11.ab1	-	-	-	-	-	-	-	-	-	-	-	-	-	-
P1C68-PPo	polen-pistil-sp6_F08_12.ab1	-	-	-	st11_olive_051444	-	OE6A105660T1	Cysteine proteinase inhibitor	-	-	-	-	-	YES	-
P1C69-PPo	polen-pistil-sp6_F09_11.ab1	-	-	-	-	-	-	-	-	-	-	-	-	-	-
P1C70-PPo	polen-pistil-sp6_F10_12.ab1	-	-	-	st11_olive_051444	-	OE6A105660T1	Cysteine proteinase inhibitor	-	-	-	-	-	YES	-
P1C71-PPo	polen-pistil-sp6_F11_11.ab1	-	-	-	-	-	-	-	-	-	-	-	-	-	-
P1C72-PPo	polen-pistil-sp6_F12_12.ab1	-	-	-	-	-	-	-	-	-	-	-	-	-	-
P1C73-PPo	polen-pistil-sp6_G01_13.ab1	-	-	-	-	-	-	-	-	-	-	-	-	-	-
P1C74-PPo	polen-pistil-sp6_G02_14.ab1	-	-	-	-	-	-	-	-	-	-	-	-	-	-
P1C75-PPo	polen-pistil-sp6_G03_13.ab1	-	-	-	-	-	-	-	-	-	-	-	-	-	-
P1C76-PPo	polen-pistil-sp6_G04_14.ab1	-	-	-	-	-	-	-	-	-	-	-	-	-	-
P1C77-PPo	polen-pistil-sp6_G05_13.ab1	-	-	-	st11_olive_011251	2 of Heat stress transcription factor B-2c Oryza sativa subsp. japonica GN=HSFB2C	OE6A054585T3	Heat stress transcription factor B-2b	-	-	YES	YES	YES	YES	YES
P1C78-PPo	polen-pistil-sp6_G06_14.ab1	-	-	-	-	-	-	-	-	-	-	-	-	-	-
P1C79-PPo	polen-pistil-sp6_G07_13.ab1	-	-	-	-	-	-	-	-	-	-	-	-	-	-
P1C80-PPo	polen-pistil-sp6_G08_14.ab1	-	-	-	-	-	-	-	-	-	-	-	-	-	-
P1C81-PPo	polen-pistil-sp6_G09_13.ab1	-	-	-	st11_olive_035359	60S ribosomal protein L17-2 Arabidopsis thaliana (Mouse-ear cress)	OE6A074522T2	60S ribosomal protein L17-2	-	-	-	YES	YES	YES	YES
P1C82-PPo	polen-pistil-sp6_G10_14.ab1	-	-	-	-	-	-	-	-	-	-	-	-	-	-
P1C83-PPo	polen-pistil-sp6_G11_13.ab1	-	-	-	st11_olive_003891	BAHD acyltransferase DCR Arabidopsis thaliana (Mouse-ear cress)	OE6A059818T2	BAHD acyltransferase DCR	-	-	-	YES	YES	YES	-
P1C84-PPo	polen-pistil-sp6_G12_14.ab1	-	-	-	-	-	-	-	-	-	-	-	-	-	-
P1C85-PPo	polen-pistil-sp6_H01_15.ab1	-	-	-	-	-	-	-	-	-	-	-	-	-	-
P1C86-PPo	polen-pistil-sp6_H02_16.ab1	-	-	-	st11_olive_004195	Floral homeotic protein APETALA 2 Arabidopsis thaliana (Mouse-ear cress)	OE6A099997T2	Floral homeotic protein APETALA 2	-	-	-	YES	YES	-	YES
P1C87-PPo	polen-pistil-sp6_H03_15.ab1	-	-	-	-	-	-	-	-	-	-	-	-	-	-
P1C88-PPo	polen-pistil-sp6_H04_16.ab1	-	-	-	-	-	-	-	-	-	-	-	-	-	-
P1C89-PPo	polen-pistil-sp6_H05_15.ab1	-	-	-	-	-	-	-	-	-	-	-	-	-	-
P1C90-PPo	polen-pistil-sp6_H06_16.ab1	-	-	-	-	-	-	-	-	-	-	-	-	-	-
P1C91-PPo	polen-pistil-sp6_H07_15.ab1	-	-	-	-	-	-	-	-	-	-	-	-	-	-
P1C92-PPo	polen-pistil-sp6_H08_16.ab1	-	-	-	st11_olive_024805	Uncharacterized protein Erythranthe guttata (Yellow monkey flower) (Mimulus guttatus)	OE6A018763T1	ATP-dependent zinc metalloprotease FtsH	-	YES	-	YES	-	YES	YES
P1C93-PPo	polen-pistil-sp6_H09_15.ab1	Putative uncharacterized protein Vitis vinifera (Grape)	4e-12	A5B200	st11_olive_024721	Putative uncharacterized protein Vitis vinifera (Grape)	OE6A026820T2	Clumping factor A	-	-	-	YES	-	YES	-
P1C94-PPo	polen-pistil-sp6_H10_16.ab1	Major allergen Mal d 1 Malus domestica (Apple) (Pyrus malus)	3e-31	Q40280	st11_olive_043653	Major allergen Pru ar 1 Prunus armeniaca (Apricot) (Armeniaca vulgaris)	OE6A107162T1	Major allergen Pru ar 1	-	-	-	YES	-	-	-
P1C95-PPo	polen-pistil-sp6_H11_15.ab1	-	-	-	st11_olive_002861	Glycosyl hydrolase family 1 beta glucosidase protein Olea europaea (Common olive)	OE6A014603T8	Raucaffricine-O-beta-D-glucosidase	-	-	-	YES	YES	YES	YES
P1C96-PPo	polen-pistil-sp6_H12_16.ab1	-	-	-	-	-	-	-	-	-	-	-	-	-	-
P2C1-PPo	1_001_A01_2012-03-02.ab1	-	-	-	-	-	-	-	-	-	-	-	-	-	-
P2C2-PPo	2_002_A02_2012-03-02.ab1	-	-	-	-	-	-	-	-	-	-	-	-	-	-
P2C3-PPo	3_001_A03_2012-03-02.ab1	-	-	-	-	-	-	-	-	-	-	-	-	-	-
P2C4-PPo	4_002_A04_2012-03-02.ab1	-	-	-	-	-	-	-	-	-	-	-	-	-	-
P2C5-PPo	5_001_A05_2012-03-02.ab1	-	-	-	-	-	-	-	-	-	-	-	-	-	-
P2C6-PPo	6_002_A06_2012-03-02.ab1	Uncharacterized protein Amborella trichopoda.	2e-10	W1NNS8	st11_olive_008239	Cytochrome b Solanum tuberosum (Potato) Mitochondrion	-	-	-	-	-	-	YES	YES	-
P2C7-PPo	7_001_A07_2012-03-02.ab1	-	-	-	st11_olive_010697	-	OE6A098060T3	Bark storage protein A	-	-	-	YES	YES	YES	YES
P2C8-PPo	8_002_A08_2012-03-02.ab1	-	-	-	-	-	-	-	-	-	-	-	-	-	-
P2C9-PPo	9_001_A09_2012-03-02.ab1	-	-	-	-	-	-	-	-	-	-	-	-	-	-
P2C10-PPo	10_002_A10_2012-03-02.ab1	-	-	-	-	-	-	-	-	-	-	-	-	-	-
P2C11-PPo	11_001_A11_2012-03-03.ab1	-	-	-	st11_olive_006155	Acyl-[acyl-carrier-protein] desaturase, chloroplastic Olea europaea (Common olive)	OE6A020845T2	Acyl-[acyl-carrier-protein] desaturase, chloroplastic	-	-	-	-	-	-	-
P2C12-PPo	12_002_A12_2012-03-03.ab1	-	-	-	st11_olive_006155	Acyl-[acyl-carrier-protein] desaturase, chloroplastic Olea europaea (Common olive)	OE6A020845T2	Acyl-[acyl-carrier-protein] desaturase, chloroplastic	-	-	-	-	-	-	-
P2C13-PPo	13_003_B01_2012-03-02.ab1	-	-	-	-	-	-	-	-	-	-	-	-	-	-
P2C14-PPo	14_004_B02_2012-03-02.ab1	Probable WRKY transcription factor 66 Arabidopsis thaliana (Mouse-ear cress)	1e-20	Q9M8M6	st11_olive_038289	Probable WRKY transcription factor 66 Arabidopsis thaliana (Mouse-ear cress)	OE6A013380T3	Probable WRKY transcription factor 70	-	-	-	-	-	-	-
P2C15-PPo	15_003_B03_2012-03-02.ab1	-	-	-	st11_olive_000939	2 of Mediator of RNA polymerase II transcription subunit 23 Arabidopsis thaliana GN=MED23	OE6A099830T3	Mediator of RNA polymerase II transcription subunit 23	-	-	-	-	-	-	-
P2C16-PPo	16_004_B04_2012-03-02.ab1	Cytochrome b561 and DOMON domain-containing protein At3g25290 Arabidopsis thaliana (Mouse-ear cress)	3e-75	Q9LSE7	st11_olive_044885	Cytochrome b561 and DOMON domain-containing protein At3g25290 Arabidopsis thaliana (Mouse-ear cress)	OE6A015859T1	Auxin-induced in root cultures protein 12	-	-	-	YES	-	-	-
P2C17-PPo	17_003_B05_2012-03-02.ab1	-	-	-	-	-	-	-	-	-	-	-	-	-	-
P2C18-PPo	18_004_B06_2012-03-02.ab1	-	-	-	st11_olive_009045	DNA helicase INO80 Arabidopsis thaliana (Mouse-ear cress)	OE6A062202T3	DNA helicase INO80	-	-	-	-	YES	-	-
P2C19-PPo	19_003_B07_2012-03-02.ab1	-	-	-	-	-	-	-	-	-	-	-	-	-	-
P2C20-PPo	20_004_B08_2012-03-02.ab1	Serine/threonine-protein phosphatase Cucumis sativus (Cucumber)	3e-84	A0A0A0KJE4	st11_olive_001025	Serine/threonine-protein phosphatase BSL1 Arabidopsis thaliana (Mouse-ear cress)	OE6A084252T2	Serine/threonine-protein phosphatase BSL1	-	-	-	-	-	-	-
P2C21-PPo	21_003_B09_2012-03-02.ab1	-	-	-	-	-	-	-	-	-	-	-	-	-	-
P2C22-PPo	22_004_B10_2012-03-02.ab1	-	-	-	st11_olive_019069	Mitogen-activated protein kinase kinase 9 Arabidopsis thaliana (Mouse-ear cress)	OE6A052451T1	Mitogen-activated protein kinase kinase 9	-	-	-	YES	YES	YES	-
P2C23-PPo	23_003_B11_2012-03-03.ab1	Mitochondrial import inner membrane translocase subunit Tim13 Oryza sativa subsp. japonica (Rice)	4e-20	Q9XGY5	st11_olive_059030	Mitochondrial import inner membrane translocase subunit Tim13 Oryza sativa subsp. japonica (Rice)	OE6A030661T1	Mitochondrial import inner membrane translocase subunit Tim13	-	-	-	YES	-	-	-
P2C24-PPo	24_004_B12_2012-03-03.ab1	Peptidyl-prolyl cis-trans isomerase CYP20-1 Arabidopsis thaliana (Mouse-ear cress)	3e-60	Q9SP02	st11_olive_021703	Peptidyl-prolyl cis-trans isomerase CYP20-1 Arabidopsis thaliana (Mouse-ear cress)	OE6A018641T1	Peptidyl-prolyl cis-trans isomerase CYP20-1	-	-	-	YES	YES	YES	YES
P2C25-PPo	25_005_C01_2012-03-02.ab1	-	-	-	-	-	-	-	-	-	-	-	-	-	-
P2C26-PPo	26_006_C02_2012-03-02.ab1	-	-	-	st11_olive_009045	DNA helicase INO80 Arabidopsis thaliana (Mouse-ear cress)	OE6A062202T3	DNA helicase INO80	-	-	-	-	YES	-	-
P2C27-PPo	27_005_C03_2012-03-02.ab1	-	-	-	-	-	-	-	-	-	-	-	-	-	-
P2C28-PPo	28_006_C04_2012-03-02.ab1	-	-	-	st11_olive_015381	Homeobox-leucine zipper protein ATHB-15 Arabidopsis thaliana (Mouse-ear cress)	OE6A105889T3	Homeobox-leucine zipper protein ATHB-15	-	-	-	-	-	-	-
P2C29-PPo	29_005_C05_2012-03-02.ab1	Phosphoglycerate kinase, cytosolic Nicotiana tabacum (Common tobacco)	2e-98	Q42962	st11_olive_028387_split_1	Phosphoglycerate kinase, cytosolic Nicotiana tabacum (Common tobacco)	OE6A041235T2	Phosphoglycerate kinase, cytosolic	-	-	-	-	-	-	-
P2C30-PPo	30_006_C06_2012-03-02.ab1	-	-	-	-	-	-	-	-	-	-	-	-	-	-
P2C31-PPo	31_005_C07_2012-03-02.ab1	-	-	-	st11_olive_039715	Putative uncharacterized protein Populus trichocarpa (Western balsam poplar) (Populus balsamifera subsp. trichocarpa)	OE6A052613T1	Geraniol 8-hydroxylase	-	-	-	-	-	-	-
P2C32-PPo	32_006_C08_2012-03-02.ab1	B-box zinc finger protein 22 Arabidopsis thaliana (Mouse-ear cress)	1e-59	Q9SYM2	st11_olive_049805	B-box zinc finger protein 22 Arabidopsis thaliana (Mouse-ear cress)	OE6A068410T1	Probable salt tolerance-like protein At1g78600	-	-	-	-	-	-	-
P2C33-PPo	33_005_C09_2012-03-02.ab1	-	-	-	-	-	-	-	-	-	-	-	-	-	-
P2C34-PPo	34_006_C10_2012-03-02.ab1	(S)-hydroxynitrile lyase Hevea brasiliensis (Para rubber tree) (Siphonia brasiliensis)	2e-33	P52704	st11_olive_046683	Salicylic acid-binding protein 2 Nicotiana tabacum (Common tobacco)	OE6A059030T1	Methylesterase 1	-	-	-	YES	YES	YES	YES
P2C35-PPo	35_005_C11_2012-03-03.ab1	-	-	-	-	-	-	-	-	-	-	-	-	-	-
P2C36-PPo	36_006_C12_2012-03-03.ab1	-	-	-	-	-	-	-	-	-	-	-	-	-	-
P2C37-PPo	37_007_D01_2012-03-02.ab1	-	-	-	-	-	-	-	-	-	-	-	-	-	-
P2C38-PPo	38_008_D02_2012-03-02.ab1	-	-	-	-	-	-	-	-	-	-	-	-	-	-
P2C39-PPo	39_007_D03_2012-03-02.ab1	-	-	-	-	-	-	-	-	-	-	-	-	-	-
P2C40-PPo	40_008_D04_2012-03-02.ab1	-	-	-	-	-	-	-	-	-	-	-	-	-	-
P2C41-PPo	41_007_D05_2012-03-02.ab1	-	-	-	-	-	-	-	-	-	-	-	-	-	-
P2C42-PPo	42_008_D06_2012-03-02.ab1	-	-	-	-	-	-	-	-	-	-	-	-	-	-
P2C43-PPo	43_007_D07_2012-03-02.ab1	-	-	-	-	-	-	-	-	-	-	-	-	-	-
P2C44-PPo	44_008_D08_2012-03-02.ab1	Protein PHR1-LIKE 2 Arabidopsis thaliana (Mouse-ear cress)	1e-52	Q94A57	st11_olive_013593	Myb family transcription factor APL Arabidopsis thaliana (Mouse-ear cress)	OE6A084950T1	Myb family transcription factor APL	-	-	-	-	-	-	-
P2C45-PPo	45_007_D09_2012-03-02.ab1	-	-	-	st11_olive_047976	E3 ubiquitin-protein ligase RGLG2 Arabidopsis thaliana (Mouse-ear cress)	OE6A095464T6	E3 ubiquitin-protein ligase RGLG2	-	-	-	-	-	-	-
P2C46-PPo	46_008_D10_2012-03-02.ab1	-	-	-	-	-	-	-	-	-	-	-	-	-	-
P2C47-PPo	47_007_D11_2012-03-03.ab1	-	-	-	-	-	-	-	-	-	-	-	-	-	-
P2C48-PPo	48_008_D12_2012-03-03.ab1	-	-	-	st11_olive_008923	Uncharacterized protein Erythranthe guttata (Yellow monkey flower) (Mimulus guttatus)	OE6A035093T1	Putative late blight resistance protein homolog R1A-6	-	-	-	YES	-	YES	-
P2C49-PPo	49_009_E01_2012-03-02.ab1	-	-	-	-	-	-	-	-	-	-	-	-	-	-
P2C50-PPo	50_010_E02_2012-03-02.ab1	-	-	-	st11_olive_000105	Magnesium-chelatase subunit ChlH, chloroplastic Arabidopsis thaliana (Mouse-ear cress)	OE6A054942T1	Magnesium-chelatase subunit ChlH, chloroplastic	-	-	-	YES	YES	YES	YES
P2C51-PPo	51_009_E03_2012-03-02.ab1	-	-	-	-	-	-	-	-	-	-	-	-	-	-
P2C52-PPo	52_010_E04_2012-03-02.ab1	-	-	-	-	-	-	-	-	-	-	-	-	-	-
P2C53-PPo	53_009_E05_2012-03-02.ab1	-	-	-	st11_olive_009803	V-type proton ATPase subunit d2 Arabidopsis thaliana (Mouse-ear cress)	OE6A028035T3	V-type proton ATPase subunit d2	-	-	-	-	-	-	-
P2C54-PPo	54_010_E06_2012-03-02.ab1	-	-	-	-	-	-	-	-	-	-	-	-	-	-
P2C55-PPo	55_009_E07_2012-03-02.ab1	-	-	-	st11_olive_008239	Cytochrome b Solanum tuberosum (Potato) Mitochondrion	-	-	-	-	-	-	-	-	-
P2C56-PPo	56_010_E08_2012-03-02.ab1	-	-	-	-	-	-	-	-	-	-	-	-	-	-
P2C57-PPo	57_009_E09_2012-03-02.ab1	-	-	-	-	-	-	-	-	-	-	-	-	-	-
P2C58-PPo	58_010_E10_2012-03-02.ab1	-	-	-	st11_olive_011039	Hydroquinone glucosyltransferase Rauvolfia serpentina (Serpentwood) (Devilpepper)	OE6A056365T1	Hydroquinone glucosyltransferase	-	-	-	-	YES	-	-
P2C59-PPo	59_009_E11_2012-03-03.ab1	Dirigent protein 23 Arabidopsis thaliana (Mouse-ear cress)	1e-28	Q84TH6	st11_olive_031339	Uncharacterized protein Erythranthe guttata (Yellow monkey flower) (Mimulus guttatus)	OE6A082703T1	Dirigent protein 21	-	-	-	YES	YES	YES	YES
P2C60-PPo	60_010_E12_2012-03-03.ab1	-	-	-	st11_olive_051444	-	OE6A046507T1	Cysteine proteinase inhibitor	-	-	-	-	-	-	-
P2C61-PPo	61_011_F01_2012-03-02.ab1	GDSL esterase/lipase At5g18430 Arabidopsis thaliana (Mouse-ear cress)	6e-103	Q5PNZ0	st11_olive_010003	GDSL esterase/lipase At5g33370 Arabidopsis thaliana (Mouse-ear cress)	OE6A085897T1	GDSL esterase/lipase At5g33370	-	-	-	-	-	-	-
P2C62-PPo	62_012_F02_2012-03-02.ab1	-	-	-	-	-	-	-	-	-	-	-	-	-	-
P2C63-PPo	63_011_F03_2012-03-02.ab1	Histone H4 Glycine max (Soybean) (Glycine hispida)	8e-54	P0CG89	st11_olive_038706	Histone H4 Glycine max (Soybean) (Glycine hispida)	OE6A038431T1	Histone H4	-	-	-	-	YES	-	-
P2C64-PPo	64_012_F04_2012-03-02.ab1	-	-	-	-	-	-	-	-	-	-	-	-	-	-
P2C65-PPo	65_011_F05_2012-03-02.ab1	-	-	-	st11_olive_032647	Calnexin homolog Glycine max (Soybean) (Glycine hispida)	OE6A013329T5	Calnexin homolog	YES	-	-	YES	YES	YES	YES
P2C66-PPo	66_012_F06_2012-03-02.ab1	-	-	-	-	-	-	-	-	-	-	-	-	-	-
P2C67-PPo	67_011_F07_2012-03-02.ab1	-	-	-	-	-	-	-	-	-	-	-	-	-	-
P2C68-PPo	68_012_F08_2012-03-02.ab1	-	-	-	st11_olive_022062	Probable WRKY transcription factor 23 Arabidopsis thaliana (Mouse-ear cress)	OE6A099866T1	Probable WRKY transcription factor 48	-	-	-	-	-	-	-
P2C69-PPo	69_011_F09_2012-03-02.ab1	-	-	-	-	-	-	-	-	-	-	-	-	-	-
P2C70-PPo	70_012_F10_2012-03-02.ab1	4-coumarate--CoA ligase 1 Nicotiana tabacum (Common tobacco)	1e-124	O24145	st11_olive_004879	4-coumarate--CoA ligase 2 Nicotiana tabacum (Common tobacco)	OE6A006366T2	4-coumarate--CoA ligase 1	-	-	-	-	-	-	-
P2C71-PPo	71_011_F11_2012-03-03.ab1	-	-	-	st11_olive_003917	Glucan endo-1,3-beta-D-glucosidase Olea europaea (Common olive)	OE6A048050T3	Glucan endo-1,3-beta-D-glucosidase	-	-	-	YES	YES	YES	YES
P2C72-PPo	72_012_F12_2012-03-03.ab1	-	-	-	st11_olive_045139	Putative uncharacterized protein Vitis vinifera (Grape)	OE6A020959T5	Serine/threonine-protein kinase PBS1	YES	-	-	-	-	YES	-
P2C73-PPo	73_013_G01_2012-03-02.ab1	Linoleate 13S-lipoxygenase 3-1, chloroplastic Solanum tuberosum (Potato)	0	O24371	st11_olive_000111	Linoleate 13S-lipoxygenase 3-1, chloroplastic Solanum tuberosum (Potato)	OE6A043608T1	Linoleate 13S-lipoxygenase 3-1, chloroplastic	-	-	-	YES	YES	YES	-
P2C74-PPo	74_014_G02_2012-03-02.ab1	-	-	-	st11_olive_048271	Coffea canephora DH200=94 genomic scaffold, scaffold_9 Coffea canephora (Robusta coffee)	OE6A030194T1	Deoxyuridine 5'-triphosphate nucleotidohydrolase	-	-	-	-	-	-	-
P2C75-PPo	75_013_G03_2012-03-02.ab1	Dirigent protein 23 Arabidopsis thaliana (Mouse-ear cress)	1e-28	Q84TH6	st11_olive_031339	Uncharacterized protein Erythranthe guttata (Yellow monkey flower) (Mimulus guttatus)	OE6A082703T1	Dirigent protein 21	-	-	-	YES	YES	YES	YES
P2C76-PPo	76_014_G04_2012-03-02.ab1	-	-	-	-	-	-	-	-	-	-	-	-	-	-
P2C77-PPo	77_013_G05_2012-03-02.ab1	-	-	-	-	-	-	-	-	-	-	-	-	-	-
P2C78-PPo	78_014_G06_2012-03-02.ab1	-	-	-	-	-	-	-	-	-	-	-	-	-	-
P2C79-PPo	79_013_G07_2012-03-02.ab1	Ferredoxin-1, chloroplastic Mesembryanthemum crystallinum (Common ice plant) (Cryophytum crystallinum)	5e-15	O04683	st11_olive_033311	Ferredoxin, chloroplastic Capsicum annuum (Bell pepper)	OE6A007297T1	Ferredoxin, chloroplastic	-	-	-	YES	YES	YES	YES
P2C80-PPo	80_014_G08_2012-03-02.ab1	Uncharacterized protein Solanum tuberosum (Potato)	5e-28	M1AYC5	st11_olive_042783	2 of Ubiquitin receptor RAD23c Arabidopsis thaliana GN=RAD23C	OE6A022987T5	Ubiquitin receptor RAD23d	-	-	-	YES	YES	YES	YES
P2C81-PPo	81_013_G09_2012-03-02.ab1	Glutathione S-transferase Hyoscyamus muticus (Egyptian henbane)	3e-37	P46423	st11_olive_023981	Glutathione S-transferase Hyoscyamus muticus (Egyptian henbane)	OE6A024298T2	Glutathione S-transferase	-	-	-	YES	YES	YES	YES
P2C82-PPo	82_014_G10_2012-03-02.ab1	-	-	-	-	-	-	-	-	-	-	-	-	-	-
P2C83-PPo	83_013_G11_2012-03-03.ab1	-	-	-	-	-	-	-	-	-	-	-	-	-	-
P2C84-PPo	84_014_G12_2012-03-03.ab1	-	-	-	-	-	-	-	-	-	-	-	-	-	-
P2C85-PPo	85_015_H01_2012-03-02.ab1	-	-	-	-	-	-	-	-	-	-	-	-	-	-
P2C86-PPo	86_016_H02_2012-03-02.ab1	-	-	-	-	-	-	-	-	-	-	-	-	-	-
P2C87-PPo	87_015_H03_2012-03-02.ab1	-	-	-	-	-	-	-	-	-	-	-	-	-	-
P2C88-PPo	88_016_H04_2012-03-02.ab1	-	-	-	-	-	-	-	-	-	-	-	-	-	-
P2C89-PPo	89_015_H05_2012-03-02.ab1	-	-	-	-	-	-	-	-	-	-	-	-	-	-
P2C90-PPo	90_016_H06_2012-03-02.ab1	-	-	-	st11_olive_001727_split_0	UBP1-associated protein 2A Arabidopsis thaliana (Mouse-ear cress)	OE6A042559T3	Heterogeneous nuclear ribonucleoprotein 1	-	-	-	-	-	-	YES
P2C91-PPo	91_015_H07_2012-03-02.ab1	Rhodanese-like domain-containing protein 4, chloroplastic Arabidopsis thaliana (Mouse-ear cress)	4e-33	Q9M158	st11_olive_006581	Rhodanese-like domain-containing protein 4, chloroplastic Arabidopsis thaliana (Mouse-ear cress)	OE6A054608T1	Rhodanese-like domain-containing protein 4, chloroplastic	-	-	-	-	-	-	-
P2C92-PPo	92_016_H08_2012-03-02.ab1	-	-	-	-	-	-	-	-	-	-	-	-	-	-
P2C93-PPo	93_015_H09_2012-03-02.ab1	-	-	-	-	-	-	-	-	-	-	-	-	-	-
P2C94-PPo	94_016_H10_2012-03-02.ab1	VSP-like protein 1 Ipomoea batatas (Sweet potato) (Convolvulus batatas)	6e-72	A0A142KXK7	st11_olive_019309	Acid phosphatase 1 Solanum lycopersicum (Tomato) (Lycopersicon esculentum)	OE6A082408T1	Acid phosphatase 1	-	-	-	YES	YES	YES	-
P2C95-PPo	95_015_H11_2012-03-03.ab1	60S ribosomal protein L8-3 Arabidopsis thaliana (Mouse-ear cress)	1e-63	Q42064	st11_olive_020813	60S ribosomal protein L8-3 Arabidopsis thaliana (Mouse-ear cress)	OE6A112301T1	60S ribosomal protein L8	-	-	YES	YES	YES	YES	YES
P2C96-PPo	96_016_H12_2012-03-03.ab1	ATP synthase subunit c, chloroplastic Pinus thunbergii (Japanese black pine) (Pinus thunbergiana) Plastid Chloroplast	2e-17	P41603	st11_olive_004346	ATP synthase subunit c, chloroplastic Pinus thunbergii (Japanese black pine) (Pinus thunbergiana) Plastid Chloroplast	-	-	-	-	-	-	-	-	-
P3C1-PPo	DZA22630_A01_SP6_A02.ab1	Uncharacterized protein Coffea canephora (Robusta coffee)	1e-53	A0A068TPS6	st11_olive_041041	Coffea canephora DH200=94 genomic scaffold, scaffold_1 Coffea canephora (Robusta coffee)	OE6A039495T1	BTB/POZ domain-containing protein NPY2	-	-	YES	YES	YES	YES	-
P3C2-PPo	DZA22630_A02_SP6_A04.ab1	-	-	-	-	-	-	-	-	-	-	-	-	-	-
P3C3-PPo	DZA22630_A03_SP6_A06.ab1	-	-	-	st11_olive_018748	-	OE6A000186T1	Squamosa promoter-binding-like protein 7	-	-	-	-	-	-	-
P3C4-PPo	DZA22630_A04_SP6_A08.ab1	-	-	-	-	-	-	-	-	-	-	-	-	-	-
P3C5-PPo	DZA22630_A05_SP6_A10.ab1	Nucleoside diphosphate kinase B Flaveria bidentis (Coastal plain yellowtops) (Ethulia bidentis)	2e-84	P47920	st11_olive_041303	Nucleoside diphosphate kinase 1 Nicotiana tabacum (Common tobacco)	OE6A101444T2	Nucleoside diphosphate kinase 1	-	-	-	-	YES	YES	YES
P3C6-PPo	DZA22630_A06_SP6_A12.ab1	-	-	-	st11_olive_035666	Uncharacterized protein Solanum tuberosum (Potato)	OE6A039934T2	Uncharacterized protein At1g04910	YES	-	-	YES	YES	YES	-
P3C7-PPo	DZA22630_A07_SP6_A14.ab1	-	-	-	-	-	-	-	-	-	-	-	-	-	-
P3C8-PPo	DZA22630_A08_SP6_A16.ab1	Gibberellin-regulated protein 14 Arabidopsis thaliana (Mouse-ear cress)	2e-20	Q9LFR3	st11_olive_032487_split_0	Snakin-2 Solanum tuberosum (Potato)	OE6A027640T1	Gibberellin-regulated protein 14	-	-	-	YES	YES	YES	-
P3C9-PPo	DZA22630_A09_SP6_A18.ab1	-	-	-	-	-	-	-	-	-	-	-	-	-	-
P3C10-PPo	DZA22630_A10_SP6_A20.ab1	-	-	-	st11_olive_000805	-	OE6A095320T1	Clumping factor A	-	-	-	-	-	-	YES
P3C11-PPo	DZA22630_A11_SP6_A22.ab1	Putative cytochrome P450 86A2-like Solanum chacoense (Chaco potato)	8e-60	A0A0V0IB70	st11_olive_031615	Putative uncharacterized protein Vitis vinifera (Grape)	OE6A107631T2	Small heat shock protein C2	-	-	-	-	-	-	-
P3C12-PPo	DZA22630_A12_SP6_A24.ab1	-	-	-	st11_olive_015559	-	OE6A093019T4	Putative UDP-sugar transporter DDB_G0278631	YES	-	-	-	YES	YES	YES
P3C13-PPo	DZA22630_B01_SP6_C02.ab1	ABA-, stress-and ripening-induced protein Fragaria ananassa (Strawberry) (Fragaria chiloensis x Fragaria virginiana)	0.28	G3JVJ6	st11_olive_037848	ABA-, stress-and ripening-induced protein Fragaria ananassa (Strawberry)	OE6A106849T1	Abscisic stress-ripening protein 1	-	YES	-	YES	YES	YES	YES
P3C14-PPo	DZA22630_B02_SP6_C04.ab1	-	-	-	-	-	-	-	-	-	-	-	-	-	-
P3C15-PPo	DZA22630_B03_SP6_C06.ab1	-	-	-	st11_olive_026789	Ethylene-responsive transcription factor ERF008 Arabidopsis thaliana (Mouse-ear cress)	OE6A071366T1	Ethylene-responsive transcription factor ERF011	-	-	-	-	-	-	-
P3C16-PPo	DZA22630_B04_SP6_C08.ab1	-	-	-	-	-	-	-	-	-	-	-	-	-	-
P3C17-PPo	DZA22630_B05_SP6_C10.ab1	-	-	-	st11_olive_051444	-	OE6A105660T1	Cysteine proteinase inhibitor	-	-	-	-	-	-	-
P3C18-PPo	DZA22630_B06_SP6_C12.ab1	Protein RALF-like 19 Arabidopsis thaliana (Mouse-ear cress)	6e-12	Q6NME6	st11_olive_058418	Protein RALF-like 19 Arabidopsis thaliana (Mouse-ear cress)	-	-	-	-	-	YES	YES	YES	-
P3C19-PPo	DZA22630_B07_SP6_C14.ab1	-	-	-	-	-	-	-	-	-	-	-	-	-	-
P3C20-PPo	DZA22630_B08_SP6_C16.ab1	NDR1/HIN1-like protein 12 Arabidopsis thaliana (Mouse-ear cress)	1e-29	Q9SJ54	st11_olive_030125	Uncharacterized protein Erythranthe guttata (Yellow monkey flower) (Mimulus guttatus)	OE6A038818T1	Protein YLS9	-	-	-	-	-	-	-
P3C21-PPo	DZA22630_B09_SP6_C18.ab1	Aldo-keto reductase family 4 member C9 Arabidopsis thaliana (Mouse-ear cress)	5e-55	Q0PGJ6	st11_olive_009193	Aldo-keto reductase family 4 member C9 Arabidopsis thaliana (Mouse-ear cress)	OE6A094965T2	Aldo-keto reductase family 4 member C9	-	-	-	-	-	-	-
P3C22-PPo	DZA22630_B10_SP6_C20.ab1	Putative uncharacterized protein Populus trichocarpa (Western balsam poplar) (Populus balsamifera subsp. trichocarpa)	2e-07	A9PC27	st11_olive_039715	Putative uncharacterized protein Populus trichocarpa (Western balsam poplar) (Populus balsamifera subsp. trichocarpa)	-	-	-	-	-	-	YES	YES	-
P3C23-PPo	DZA22630_B11_SP6_C22.ab1	Dof zinc finger protein DOF5.4 Arabidopsis thaliana (Mouse-ear cress)	0.003	Q8LDR0	st11_olive_011337	Dof zinc finger protein DOF3.1 Arabidopsis thaliana (Mouse-ear cress)	OE6A089438T2	Dof zinc finger protein DOF5.4	-	-	-	-	-	YES	-
P3C24-PPo	DZA22630_B12_SP6_C24.ab1	-	-	-	-	-	-	-	-	-	-	-	-	-	-
P3C25-PPo	DZA22630_C01_SP6_E02.ab1	Malic enzyme Solanum chacoense (Chaco potato)	9e-73	A0A0V0ISF3	st11_olive_003085	NADP-dependent malic enzyme, chloroplastic Flaveria pringlei.	OE6A088887T6	NADP-dependent malic enzyme, chloroplastic	YES	YES	YES	-	YES	YES	YES
P3C26-PPo	DZA22630_C02_SP6_E04.ab1	Glutamine synthetase Alnus glutinosa (European alder) (Betula alnus var. glutinosa)	2e-121	O04867	st11_olive_007437	Glutamine synthetase cytosolic isozyme 2 Vitis vinifera (Grape)	OE6A048840T3	Glutamine synthetase nodule isozyme	-	-	-	YES	YES	YES	-
P3C27-PPo	DZA22630_C03_SP6_E06.ab1	-	-	-	-	-	-	-	-	-	-	-	-	-	-
P3C28-PPo	DZA22630_C04_SP6_E08.ab1	-	-	-	-	-	-	-	-	-	-	-	-	-	-
P3C29-PPo	DZA22630_C05_SP6_E10.ab1	-	-	-	-	-	-	-	-	-	-	-	-	-	-
P3C30-PPo	DZA22630_C06_SP6_E12.ab1	-	-	-	st11_olive_026183	Putative uncharacterized protein Vitis vinifera (Grape)	OE6A091428T4	Growth-regulating factor 1	-	-	-	-	-	-	-
P3C31-PPo	DZA22630_C07_SP6_E14.ab1	-	-	-	st11_olive_057259	CBS domain-containing protein CBSX1, chloroplastic Arabidopsis thaliana (Mouse-ear cress)	OE6A036260T3	CBS domain-containing protein CBSX2, chloroplastic	-	-	-	-	YES	-	YES
P3C32-PPo	DZA22630_C08_SP6_E16.ab1	-	-	-	st11_olive_011987	Probable aquaporin PIP1-2 Oryza sativa subsp. japonica (Rice)	OE6A097898T2	Probable aquaporin PIP1-2	-	-	-	YES	YES	YES	-
P3C33-PPo	DZA22630_C09_SP6_E18.ab1	Uncharacterized protein Erythranthe guttata (Yellow monkey flower) (Mimulus guttatus)	6e-88	A0A022RPT5	st11_olive_032077	Uncharacterized protein Erythranthe guttata (Yellow monkey flower) (Mimulus guttatus)	OE6A110740T1	Nucleolar MIF4G domain-containing protein 1	-	-	-	-	-	-	-
P3C34-PPo	DZA22630_C10_SP6_E20.ab1	-	-	-	-	-	-	-	-	-	-	-	-	-	-
P3C35-PPo	DZA22630_C11_SP6_E22.ab1	-	-	-	-	-	-	-	-	-	-	-	-	-	-
P3C36-PPo	DZA22630_C12_SP6_E24.ab1	Protein RALF-like 19 Arabidopsis thaliana (Mouse-ear cress)	4e-12	Q6NME6	st11_olive_010507_split_0	Protein RALF-like 19 Arabidopsis thaliana (Mouse-ear cress)	-	-	-	-	-	YES	YES	YES	-
P3C37-PPo	DZA22630_D01_SP6_G02.ab1	Histone H4 Olisthodiscus luteus (Marine phytoflagellate)	3e-40	P82888	st11_olive_017025	Coffea canephora DH200=94 genomic scaffold, scaffold_13 Coffea canephora (Robusta coffee)	OE6A090361T2	Probable S-adenosylmethionine-dependent methyltransferase At5g37990	-	-	-	-	-	-	-
P3C38-PPo	DZA22630_D02_SP6_G04.ab1	-	-	-	-	-	-	-	-	-	-	-	-	-	-
P3C39-PPo	DZA22630_D03_SP6_G06.ab1	-	-	-	-	-	-	-	-	-	-	-	-	-	-
P3C40-PPo	DZA22630_D04_SP6_G08.ab1	Elongation factor 1-alpha, putative Ricinus communis (Castor bean)	2e-67	B9TJS6	st11_olive_000134	Elongation factor 1-alpha Triticum aestivum (Wheat)	OE6A045598T2	Elongation factor 1-alpha	-	-	YES	YES	YES	YES	YES
P3C41-PPo	DZA22630_D05_SP6_G10.ab1	-	-	-	-	-	-	-	-	-	-	-	-	-	-
P3C42-PPo	DZA22630_D06_SP6_G12.ab1	-	-	-	-	-	-	-	-	-	-	-	-	-	-
P3C43-PPo	DZA22630_D07_SP6_G14.ab1	2-methyl-6-phytyl-1,4-hydroquinone methyltransferase, chloroplastic Spinacia oleracea (Spinach)	2e-58	P23525	st11_olive_012021	2-methyl-6-phytyl-1,4-hydroquinone methyltransferase, chloroplastic Spinacia oleracea (Spinach)	OE6A047012T1	2-methyl-6-phytyl-1,4-hydroquinone methyltransferase, chloroplastic	-	-	-	-	-	YES	YES
P3C44-PPo	DZA22630_D08_SP6_G16.ab1	-	-	-	-	-	-	-	-	-	-	-	-	-	-
P3C45-PPo	DZA22630_D09_SP6_G18.ab1	-	-	-	-	-	-	-	-	-	-	-	-	-	-
P3C46-PPo	DZA22630_D10_SP6_G20.ab1	-	-	-	st11_olive_017787	Uncharacterized protein Erythranthe guttata (Yellow monkey flower) (Mimulus guttatus)	OE6A039175T2	Calcium-binding protein 39	-	-	-	-	-	-	-
P3C47-PPo	DZA22630_D11_SP6_G22.ab1	Pathogenesis-related protein 5 Arabidopsis thaliana (Mouse-ear cress)	6e-81	P28493	st11_olive_016489	Pathogenesis-related protein 5 Arabidopsis thaliana (Mouse-ear cress)	OE6A051451T1	Pathogenesis-related protein 5	-	-	-	YES	YES	YES	-
P3C48-PPo	DZA22630_D12_SP6_G24.ab1	-	-	-	-	-	-	-	-	-	-	-	-	-	-
P3C49-PPo	DZA22630_E01_SP6_I02.ab1	-	-	-	-	-	-	-	-	-	-	-	-	-	-
P3C50-PPo	DZA22630_E02_SP6_I04.ab1	-	-	-	st11_olive_015575	Thaumatin-like protein Actinidia deliciosa (Kiwi)	OE6A062898T1	Thaumatin-like protein	-	-	-	YES	YES	YES	-
P3C51-PPo	DZA22630_E03_SP6_I06.ab1	-	-	-	-	-	-	-	-	-	-	-	-	-	-
P3C52-PPo	DZA22630_E04_SP6_I08.ab1	-	-	-	st11_olive_020401	-	OE6A071886T1	RAN GTPase-activating protein 1	-	-	-	-	-	-	YES
P3C53-PPo	DZA22630_E05_SP6_I10.ab1	-	-	-	-	-	OE6A057799T1	Deoxycytidine kinase	-	-	-	-	-	-	-
P3C54-PPo	DZA22630_E06_SP6_I12.ab1	-	-	-	st11_olive_013586	-	OE6A010497T2	Calreticulin-3	-	-	-	-	-	-	-
P3C55-PPo	DZA22630_E07_SP6_I14.ab1	(S)-hydroxynitrile lyase Hevea brasiliensis (Para rubber tree) (Siphonia brasiliensis)	2e-33	P52704	st11_olive_046683	Salicylic acid-binding protein 2 Nicotiana tabacum (Common tobacco)	OE6A059030T1	Methylesterase 1	-	-	-	YES	YES	YES	YES
P3C56-PPo	DZA22630_E08_SP6_I16.ab1	-	-	-	st11_olive_013973	Uncharacterized protein Solanum tuberosum (Potato)	OE6A097843T1	Quinone oxidoreductase	-	-	-	-	-	-	-
P3C57-PPo	DZA22630_E09_SP6_I18.ab1	Uncharacterized protein Solanum tuberosum (Potato)	2e-40	M1BYX7	st11_olive_003277	2 of Probable LRR receptor-like serine/threonine-protein kinase At5g65240 Arabidopsis thaliana GN=At5g65240	OE6A071681T3	Probable LRR receptor-like serine/threonine-protein kinase At5g10290	-	-	-	-	-	-	-
P3C58-PPo	DZA22630_E10_SP6_I20.ab1	-	-	-	st11_olive_051444	-	OE6A046507T1	Cysteine proteinase inhibitor	-	-	-	-	-	-	-
P3C59-PPo	DZA22630_E11_SP6_I22.ab1	Transcription factor bHLH143 Arabidopsis thaliana (Mouse-ear cress)	4e-06	Q9FY69	st11_olive_017917	Uncharacterized protein Brachypodium distachyon (Purple false brome) (Trachynia distachya)	OE6A066192T1	Transcription factor bHLH143	-	-	-	-	-	-	-
P3C60-PPo	DZA22630_E12_SP6_I24.ab1	-	-	-	st11_olive_051444	-	OE6A105660T1	Cysteine proteinase inhibitor	-	-	-	-	-	-	-
P3C61-PPo	DZA22630_F01_SP6_K02.ab1	-	-	-	-	-	-	-	-	-	-	-	-	-	-
P3C62-PPo	DZA22630_F02_SP6_K04.ab1	Protein RALF-like 24 Arabidopsis thaliana (Mouse-ear cress)	5e-10	Q9LK37	st11_olive_020153_split_1	Protein RALF-like 24 Arabidopsis thaliana (Mouse-ear cress)	-	-	-	-	-	YES	YES	YES	-
P3C63-PPo	DZA22630_F03_SP6_K06.ab1	Uncharacterized protein Coffea canephora (Robusta coffee)	2e-49	A0A068VJA8	st11_olive_024763	Coffea canephora DH200=94 genomic scaffold, scaffold_660 Coffea canephora (Robusta coffee)	OE6A010937T1	Geraniol dehydrogenase 1	-	-	-	-	-	-	-
P3C64-PPo	DZA22630_F04_SP6_K08.ab1	2 of Mediator of RNA polymerase II transcription subunit 25 Arabidopsis thaliana GN=MED25	7e-74	Q7XYY2-2	st11_olive_002035	Mediator of RNA polymerase II transcription subunit 25 Arabidopsis thaliana (Mouse-ear cress)	OE6A074454T2	Mediator of RNA polymerase II transcription subunit 25	-	-	-	-	-	-	-
P3C65-PPo	DZA22630_F05_SP6_K10.ab1	-	-	-	-	-	-	-	-	-	-	-	-	-	-
P3C66-PPo	DZA22630_F06_SP6_K12.ab1	-	-	-	st11_olive_052595	-	-	-	-	-	-	-	-	-	-
P3C67-PPo	DZA22630_F07_SP6_K14.ab1	-	-	-	st11_olive_004155	Serine/threonine-protein kinase KIPK Arabidopsis thaliana (Mouse-ear cress)	OE6A011087T4	Serine/threonine-protein kinase KIPK	-	-	-	-	-	YES	-
P3C68-PPo	DZA22630_F08_SP6_K16.ab1	-	-	-	-	-	-	-	-	-	-	-	-	-	-
P3C69-PPo	DZA22630_F09_SP6_K18.ab1	-	-	-	st11_olive_013253	Uncharacterized protein Erythranthe guttata (Yellow monkey flower) (Mimulus guttatus)	OE6A051529T5	SEC14-like protein 1	-	-	-	-	-	-	YES
P3C70-PPo	DZA22630_F10_SP6_K20.ab1	-	-	-	st11_olive_051444	-	OE6A105660T1	Cysteine proteinase inhibitor	-	-	-	-	-	-	-
P3C71-PPo	DZA22630_F11_SP6_K22.ab1	-	-	-	-	-	-	-	-	-	-	-	-	-	-
P3C72-PPo	DZA22630_F12_SP6_K24.ab1	Transcription factor bHLH115 Arabidopsis thaliana (Mouse-ear cress)	1e-45	Q9C682	st11_olive_019531	Transcription factor bHLH115 Arabidopsis thaliana (Mouse-ear cress)	OE6A106715T2	Transcription factor bHLH115	-	-	-	-	-	-	-
P3C73-PPo	DZA22630_G01_SP6_M02.ab1	-	-	-	-	-	-	-	-	-	-	-	-	-	-
P3C74-PPo	DZA22630_G02_SP6_M04.ab1	-	-	-	st11_olive_000215	Uncharacterized protein Erythranthe guttata (Yellow monkey flower) (Mimulus guttatus)	OE6A057102T9	Transcription-associated protein 1	-	-	-	-	-	YES	YES
P3C75-PPo	DZA22630_G03_SP6_M06.ab1	-	-	-	st11_olive_000004	Elongation factor 1-alpha Triticum aestivum (Wheat)	OE6A045598T2	Elongation factor 1-alpha	YES	YES	YES	YES	YES	YES	YES
P3C76-PPo	DZA22630_G04_SP6_M08.ab1	UDP-glycosyltransferase 74E2 Arabidopsis thaliana (Mouse-ear cress)	0	Q9SYK9	st11_olive_008505	UDP-glycosyltransferase 74F2 Arabidopsis thaliana (Mouse-ear cress)	OE6A046733T2	UDP-glycosyltransferase 74F2	-	-	-	YES	-	YES	YES
P3C77-PPo	DZA22630_G05_SP6_M10.ab1	Pathogenesis-related protein 5 Arabidopsis thaliana (Mouse-ear cress)	6e-81	P28493	st11_olive_016489	Pathogenesis-related protein 5 Arabidopsis thaliana (Mouse-ear cress)	OE6A051451T1	Pathogenesis-related protein 5	-	-	-	YES	YES	YES	-
P3C78-PPo	DZA22630_G06_SP6_M12.ab1	-	-	-	st11_olive_000619	Coffea canephora DH200=94 genomic scaffold, scaffold_24 Coffea canephora (Robusta coffee)	OE6A109711T4	Serine/threonine-protein phosphatase 6 regulatory subunit 3	-	-	-	-	-	-	-
P3C79-PPo	DZA22630_G07_SP6_M14.ab1	40S ribosomal protein S27-2 Arabidopsis thaliana (Mouse-ear cress)	2e-29	Q9M2F1	st11_olive_024444	40S ribosomal protein S27-2 Arabidopsis thaliana (Mouse-ear cress)	OE6A038124T1	40S ribosomal protein S27-2	-	-	-	-	-	-	-
P3C80-PPo	DZA22630_G08_SP6_M16.ab1	Probable CCR4-associated factor 1 homolog 7 Arabidopsis thaliana (Mouse-ear cress)	4e-80	Q9SKZ2	st11_olive_020389	Probable CCR4-associated factor 1 homolog 7 Arabidopsis thaliana (Mouse-ear cress)	OE6A088052T1	Probable CCR4-associated factor 1 homolog 6	-	-	-	-	-	-	-
P3C81-PPo	DZA22630_G09_SP6_M18.ab1	-	-	-	-	-	-	-	-	-	-	-	-	-	-
P3C82-PPo	DZA22630_G10_SP6_M20.ab1	14-3-3-like protein Mesembryanthemum crystallinum (Common ice plant) (Cryophytum crystallinum)	7e-67	P93259	st11_olive_013703	14-3-3 protein 4 Solanum lycopersicum (Tomato) (Lycopersicon esculentum)	OE6A016584T4	14-3-3 protein 4	-	-	-	YES	YES	YES	YES
P3C83-PPo	DZA22630_G11_SP6_M22.ab1	-	-	-	-	-	-	-	-	-	-	-	-	-	-
P3C84-PPo	DZA22630_G12_SP6_M24.ab1	H/ACA ribonucleoprotein complex subunit 3-like protein Arabidopsis thaliana (Mouse-ear cress)	3e-34	Q93XX8	st11_olive_050669	H/ACA ribonucleoprotein complex subunit 3-like protein Arabidopsis thaliana (Mouse-ear cress)	OE6A087053T1	H/ACA ribonucleoprotein complex subunit 3-like protein	-	-	-	YES	-	-	-
P3C85-PPo	DZA22630_H01_SP6_O02.ab1	14-3-3-like protein Solanum tuberosum (Potato)	1e-69	Q41418	st11_olive_016911	14-3-3 protein 4 Solanum lycopersicum (Tomato) (Lycopersicon esculentum)	OE6A016584T5	14-3-3-like protein	-	-	-	YES	YES	YES	YES
P3C86-PPo	DZA22630_H02_SP6_O04.ab1	-	-	-	-	-	-	-	-	-	-	-	-	-	-
P3C87-PPo	DZA22630_H03_SP6_O06.ab1	-	-	-	-	-	-	-	-	-	-	-	-	-	-
P3C88-PPo	DZA22630_H04_SP6_O08.ab1	Protein STAY-GREEN LIKE, chloroplastic Arabidopsis thaliana (Mouse-ear cress)	0	Q94AQ9	st11_olive_035295	Protein STAY-GREEN LIKE, chloroplastic Arabidopsis thaliana (Mouse-ear cress)	OE6A104491T2	Protein STAY-GREEN LIKE, chloroplastic	-	-	-	-	-	YES	-
P3C89-PPo	DZA22630_H05_SP6_O10.ab1	-	-	-	-	-	-	-	-	-	-	-	-	-	-
P3C90-PPo	DZA22630_H06_SP6_O12.ab1	-	-	-	-	-	-	-	-	-	-	-	-	-	-
P3C91-PPo	DZA22630_H07_SP6_O14.ab1	-	-	-	-	-	-	-	-	-	-	-	-	-	-
P3C92-PPo	DZA22630_H08_SP6_O16.ab1	-	-	-	-	-	-	-	-	-	-	-	-	-	-
P3C93-PPo	DZA22630_H09_SP6_O18.ab1	-	-	-	-	-	-	-	-	-	-	-	-	-	-
P3C94-PPo	DZA22630_H10_SP6_O20.ab1	-	-	-	-	-	-	-	-	-	-	-	-	-	-
P3C95-PPo	DZA22630_H11_SP6_O22.ab1	-	-	-	-	-	-	-	-	-	-	-	-	-	-
P3C96-PPo	DZA22630_H12_SP6_O24.ab1	Glutathione S-transferase Hyoscyamus muticus (Egyptian henbane)	3e-35	P46423	st11_olive_023981	Glutathione S-transferase Hyoscyamus muticus (Egyptian henbane)	OE6A024298T2	Glutathione S-transferase	-	-	-	YES	YES	YES	-
