# Supplementary material for: Identification and Functional Annotation of Genes Differentially Expressed in the Reproductive Tissues of the Olive Tree (Olea europaea L.) through the Generation of Subtractive Libraries
Source: Front Plant Sci. 2017 Sep 13;8:1576. doi: 10.3389/fpls.2017.01576 (PMC5601413; doi:10.3389/fpls.2017.01576)
Supplement: Supplementary file 11 [file Table11.XLSX]

## Sheet: T_Pistil__D_Leaf_table_complete
Pi(L)		FULL-LengtherNext ANNOTATION			REPROLIVE		CRUZ		BLAST WITH Roche/454 READS
Sample	Fastq_id	Description	e-value	Subject_id	pistil_transc_id	pistil_description	cruz_transc_id	cruz_description	pollen_mature	pollen_germ_1h	pollen_germ_5h30min	pistil_stage2	pistil_stage3	pistil_stage4	leaf			Rejected by SeqTrimNext
P1C1-PL	1_SP6_A01.ab1	Protein translation factor SUI1 homolog Sporobolus stapfianus (Ressurection grass)	2e-58	Q9SM41	st11_olive_045469	Protein translation factor SUI1 homolog Sporobolus stapfianus (Ressurection grass)	OE6A117793T1	Protein translation factor SUI1 homolog	-	YES	YES	-	YES	YES	-
P1C2-PL	2_SP6_A03.ab1	-	-	-	-	-	-	-	-	-	-	-	-	-	-
P1C3-PL	3_SP6_A05.ab1	-	-	-	st11_olive_006847	Uncharacterized protein At3g27210 Arabidopsis thaliana (Mouse-ear cress)	OE6A013048T3	Protein ENHANCED DISEASE RESISTANCE 2	YES	YES	YES	-	-	-	-
P1C4-PL	4_SP6_A07.ab1	-	-	-	-	-	-	-	-	-	-	-	-	-	-
P1C5-PL	5_SP6_A09.ab1	Uncharacterized protein Cajanus cajan (Pigeon pea) (Cajanus indicus)	2e-08	A0A151TV21	st11_olive_053640	Putative uncharacterized protein Populus trichocarpa (Western balsam poplar) (Populus balsamifera subsp. trichocarpa)	-	-	YES	YES	YES	-	-	-	-
P1C6-PL	6_SP6_A11.ab1	-	-	-	-	-	-	-	-	-	-	-	-	-	-
P1C7-PL	7_SP6_A13.ab1	PLAT domain-containing protein 1 Arabidopsis thaliana (Mouse-ear cress)	3e-37	O65660	st11_olive_028321	Uncharacterized protein Erythranthe guttata (Yellow monkey flower) (Mimulus guttatus)	OE6A051813T1	Lipoxygenase homology domain-containing protein 1	-	-	-	-	-	-	-
P1C8-PL	8_SP6_A15.ab1	-	-	-	-	-	-	-	-	-	-	-	-	-	-
P1C9-PL	9_SP6_A17.ab1	40S ribosomal protein S29 Arabidopsis thaliana (Mouse-ear cress)	3e-30	Q680P8	st11_olive_033100	40S ribosomal protein S29 Arabidopsis thaliana (Mouse-ear cress)	OE6A064911T1	40S ribosomal protein S29	-	-	-	-	-	-	-
P1C10-PL	10_SP6_A19.ab1	Acid phosphatase 1 Solanum lycopersicum (Tomato) (Lycopersicon esculentum)	1e-45	P27061	st11_olive_019309	Acid phosphatase 1 Solanum lycopersicum (Tomato) (Lycopersicon esculentum)	OE6A082408T1	Acid phosphatase 1	-	-	-	YES	YES	YES	-
P1C11-PL	11_SP6_A21.ab1	-	-	-	st11_olive_051444	-	OE6A105660T1	Cysteine proteinase inhibitor	-	-	-	-	-	-	-
P1C12-PL	12_SP6_A23.ab1	Potassium transporter 2 Arabidopsis thaliana (Mouse-ear cress)	1e-140	O22881	st11_olive_006037	Potassium transporter 2 Arabidopsis thaliana (Mouse-ear cress)	OE6A065504T2	Potassium transporter 2	-	-	-	YES	YES	-	-
P1C13-PL	13_SP6_C01.ab1	-	-	-	-	-	-	-	-	-	-	-	-	-	-
P1C14-PL	14_SP6_C03.ab1	Chlorophyllase-2, chloroplastic Arabidopsis thaliana (Mouse-ear cress)	8e-38	Q9M7I7	st11_olive_019483	Uncharacterized protein Erythranthe guttata (Yellow monkey flower) (Mimulus guttatus)	OE6A020234T1	Chlorophyllase-2, chloroplastic	-	-	-	YES	YES	-	-
P1C15-PL	15_SP6_C05.ab1	-	-	-	-	-	-	-	-	-	-	-	-	-	-
P1C16-PL	16_SP6_C07.ab1	-	-	-	st11_olive_044262	-	OE6A102085T1	1-aminocyclopropane-1-carboxylate oxidase homolog 11	YES	YES	YES	-	-	-	-
P1C17-PL	17_SP6_C09.ab1	Rapid alkalinization factor Genlisea aurea.	0.003	S8CZN7	st11_olive_035439	Protein RALF-like 19 Arabidopsis thaliana (Mouse-ear cress)	OE6A099118T1	Protein RALF-like 19	YES	YES	YES	-	-	-	-
P1C18-PL	18_SP6_C11.ab1	Osmotin-like protein OSML13 Solanum commersonii (Commerson's wild potato) (Commerson's nightshade)	2e-16	P50701	st11_olive_015575	Thaumatin-like protein Actinidia deliciosa (Kiwi)	OE6A062898T1	Thaumatin-like protein	-	-	-	-	-	-	-
P1C19-PL	19_SP6_C13.ab1	Uncharacterized protein Zea mays (Maize)	1e-52	A0A1D6FRG4	st11_olive_023407	Serine/threonine-protein kinase PBS1 Arabidopsis thaliana (Mouse-ear cress)	OE6A043277T1	Serine/threonine-protein kinase PBS1	-	-	-	-	-	-	-
P1C20-PL	20_SP6_C15.ab1	-	-	-	-	-	-	-	-	-	-	-	-	-	-
P1C21-PL	21_SP6_C17.ab1	-	-	-	st11_olive_006029	Omega-6 fatty acid desaturase, endoplasmic reticulum isozyme 2 Glycine max (Soybean) (Glycine hispida)	OE6A019200T1	Omega-6 fatty acid desaturase, endoplasmic reticulum isozyme 2	YES	YES	YES	YES	YES	YES	-
P1C22-PL	22_SP6_C19.ab1	-	-	-	-	-	-	-	-	-	-	-	-	-	-
P1C23-PL	23_SP6_C21.ab1	Protein indeterminate-domain 2 Arabidopsis thaliana (Mouse-ear cress)	4e-05	Q9SCQ6	st11_olive_021305	2 of Zinc finger protein MAGPIE Arabidopsis thaliana GN=MGP	OE6A073529T1	Zinc finger protein MAGPIE	-	-	-	-	-	-	-
P1C24-PL	24_SP6_C23.ab1	-	-	-	-	-	-	-	-	-	-	-	-	-	-
P1C25-PL	25_SP6_E01.ab1	-	-	-	st11_olive_047958	Purple acid phosphatase 18 Arabidopsis thaliana (Mouse-ear cress)	OE6A106708T2	Purple acid phosphatase 18	-	-	-	-	-	-	-
P1C26-PL	26_SP6_E03.ab1	-	-	-	-	-	-	-	-	-	-	-	-	-	-
P1C27-PL	27_SP6_E05.ab1	-	-	-	-	-	-	-	-	-	-	-	-	-	-
P1C28-PL	28_SP6_E07.ab1	Chitinase-like protein 1 Arabidopsis thaliana (Mouse-ear cress)	3e-100	Q9MA41	st11_olive_012025	Chitinase-like protein 1 Arabidopsis thaliana (Mouse-ear cress)	OE6A068866T3	Chitinase-like protein 1	-	-	YES	YES	YES	YES	YES
P1C29-PL	29_SP6_E09.ab1	Thaumatin-like protein Arabidopsis thaliana (Mouse-ear cress)	6e-64	P50699	st11_olive_033317	Thaumatin-like protein Arabidopsis thaliana (Mouse-ear cress)	OE6A019177T1	Pathogenesis-related protein 5	-	-	-	YES	YES	YES	-
P1C30-PL	30_SP6_E11.ab1	-	-	-	st11_olive_008375	Coffea canephora DH200=94 genomic scaffold, scaffold_83 Coffea canephora (Robusta coffee)	OE6A108442T1	Glucan endo-1,3-beta-glucosidase 14	-	-	-	YES	YES	YES	-
P1C31-PL	31_SP6_E13.ab1	-	-	-	-	-	-	-	-	-	-	-	-	-	-
P1C32-PL	32_SP6_E15.ab1	-	-	-	-	-	-	-	-	-	-	-	-	-	-
P1C33-PL	33_SP6_E17.ab1	-	-	-	-	-	-	-	-	-	-	-	-	-	-
P1C34-PL	34_SP6_E19.ab1	-	-	-	-	-	-	-	-	-	-	-	-	-	-
P1C35-PL	35_SP6_E21.ab1	-	-	-	-	-	-	-	-	-	-	-	-	-	-
P1C36-PL	36_SP6_E23.ab1	Thaumatin-like protein Arabidopsis thaliana (Mouse-ear cress)	1e-73	P50699	st11_olive_010105	Pathogenesis-related protein 5 Arabidopsis thaliana (Mouse-ear cress)	OE6A019177T1	Pathogenesis-related protein 5	-	-	-	YES	YES	YES	-
P1C37-PL	37_SP6_G01.ab1	-	-	-	-	-	-	-	-	-	-	-	-	-	-
P1C38-PL	38_SP6_G03.ab1	-	-	-	-	-	-	-	-	-	-	-	-	-	-
P1C39-PL	39_SP6_G05.ab1	Thaumatin-like protein Arabidopsis thaliana (Mouse-ear cress)	3e-70	P50699	st11_olive_010105	Pathogenesis-related protein 5 Arabidopsis thaliana (Mouse-ear cress)	OE6A019177T1	Pathogenesis-related protein 5	-	-	-	YES	YES	YES	-
P1C40-PL	40_SP6_G07.ab1	-	-	-	-	-	-	-	-	-	-	-	-	-	-
P1C41-PL	41_SP6_G09.ab1	-	-	-	-	-	-	-	-	-	-	-	-	-	-
P1C42-PL	42_SP6_G11.ab1	-	-	-	-	-	-	-	-	-	-	-	-	-	-
P1C43-PL	43_SP6_G13.ab1	-	-	-	-	-	-	-	-	-	-	-	-	-	-
P1C44-PL	44_SP6_G15.ab1	-	-	-	st11_olive_000151	Paired amphipathic helix protein Sin3-like 2 Arabidopsis thaliana (Mouse-ear cress)	OE6A050974T2	Paired amphipathic helix protein Sin3-like 2	-	-	-	-	-	-	-
P1C45-PL	45_SP6_G17.ab1	ATP synthase subunit delta', mitochondrial Ipomoea batatas (Sweet potato) (Convolvulus batatas)	2e-97	Q40089	st11_olive_033585	ATP synthase subunit delta', mitochondrial Ipomoea batatas (Sweet potato) (Convolvulus batatas)	OE6A119525T1	ATP synthase subunit delta', mitochondrial	-	-	YES	-	-	-	YES
P1C46-PL	46_SP6_G19.ab1	-	-	-	-	-	-	-	-	-	-	-	-	-	-
P1C47-PL	47_SP6_G21.ab1	-	-	-	-	-	OE6A119801T4	Transmembrane 9 superfamily member 4	-	-	-	-	-	-	-
P1C48-PL	48_SP6_G23.ab1	-	-	-	-	-	-	-	-	-	-	-	-	-	-
P1C49-PL	49_SP6_I01.ab1	-	-	-	st11_olive_051269	-	OE6A118985T3	SUN domain-containing protein 2	-	-	-	-	-	-	-
P1C50-PL	50_SP6_I03.ab1	-	-	-	st11_olive_017534	-	OE6A106168T1	Putative late blight resistance protein homolog R1A-6	-	-	-	-	-	-	-
P1C51-PL	51_SP6_I05.ab1	Probable calcium-binding protein CML13 Arabidopsis thaliana (Mouse-ear cress)	1e-91	Q94AZ4	st11_olive_045695	Probable calcium-binding protein CML13 Arabidopsis thaliana (Mouse-ear cress)	OE6A104272T1	Probable calcium-binding protein CML13	YES	YES	-	-	-	YES	-
P1C52-PL	52_SP6_I07.ab1	-	-	-	st11_olive_000617	Beta-Amyrin Synthase 1 Panax ginseng (Korean ginseng)	OE6A085890T4	Beta-Amyrin Synthase 1	-	-	-	YES	YES	YES	-
P1C53-PL	53_SP6_I09.ab1	-	-	-	st11_olive_051444	-	OE6A105660T1	Cysteine proteinase inhibitor	-	-	-	-	-	-	-
P1C54-PL	54_SP6_I11.ab1	Photosystem II core complex proteins psbY, chloroplastic Arabidopsis thaliana (Mouse-ear cress)	0	O49347	st11_olive_020153_split_1	Protein RALF-like 24 Arabidopsis thaliana (Mouse-ear cress)	OE6A048199T1	Photosystem II core complex proteins psbY, chloroplastic	-	-	-	-	-	-	-
P1C55-PL	55_SP6_I13.ab1	-	-	-	-	-	-	-	-	-	-	-	-	-	-
P1C56-PL	56_SP6_I15.ab1	-	-	-	-	-	-	-	-	-	-	-	-	-	-
P1C57-PL	57_SP6_I17.ab1	Cysteine proteinase inhibitor Cajanus cajan (Pigeon pea) (Cajanus indicus)	0.0004	A0A151QZF6	st11_olive_051444	-	OE6A105660T1	Cysteine proteinase inhibitor	-	-	-	-	-	-	-
P1C58-PL	58_SP6_I19.ab1	-	-	-	-	-	-	-	-	-	-	-	-	-	-
P1C59-PL	59_SP6_I21.ab1	Thaumatin-like protein Arabidopsis thaliana (Mouse-ear cress)	3e-72	P50699	st11_olive_010105	Pathogenesis-related protein 5 Arabidopsis thaliana (Mouse-ear cress)	OE6A019177T1	Pathogenesis-related protein 5	-	-	-	YES	YES	YES	-
P1C60-PL	60_SP6_I23.ab1	-	-	-	st11_olive_051444	-	OE6A046507T1	Cysteine proteinase inhibitor	-	-	-	-	-	-	-
P1C61-PL	61_SP6_K01.ab1	-	-	-	-	-	-	-	-	-	-	-	-	-	-
P1C62-PL	62_SP6_K03.ab1	-	-	-	-	-	OE6A062279T1	Uncharacterized protein At1g04910	-	-	-	-	-	-	-
P1C63-PL	63_SP6_K05.ab1	Thaumatin-like protein Arabidopsis thaliana (Mouse-ear cress)	5e-62	P50699	st11_olive_033317	Thaumatin-like protein Arabidopsis thaliana (Mouse-ear cress)	OE6A019177T1	Pathogenesis-related protein 5	-	-	-	YES	YES	YES	-
P1C64-PL	64_SP6_K07.ab1	-	-	-	-	-	-	-	-	-	-	-	-	-	-
P1C65-PL	65_SP6_K09.ab1	-	-	-	-	-	-	-	-	-	-	-	-	-	-
P1C66-PL	66_SP6_K11.ab1	-	-	-	-	-	-	-	-	-	-	-	-	-	-
P1C67-PL	67_SP6_K13.ab1	Gibberellin-regulated protein 14 Arabidopsis thaliana (Mouse-ear cress)	1e-20	Q9LFR3	st11_olive_032487_split_0	Snakin-2 Solanum tuberosum (Potato)	OE6A027640T1	Gibberellin-regulated protein 14	-	-	-	-	-	-	-
P1C68-PL	68_SP6_K15.ab1	-	-	-	-	-	-	-	-	-	-	-	-	-	-
P1C69-PL	69_SP6_K17.ab1	-	-	-	-	-	-	-	-	-	-	-	-	-	-
P1C70-PL	70_SP6_K19.ab1	-	-	-	-	-	-	-	-	-	-	-	-	-	-
P1C71-PL	71_SP6_K21.ab1	Thaumatin-like protein Arabidopsis thaliana (Mouse-ear cress)	3e-69	P50699	st11_olive_033317	Thaumatin-like protein Arabidopsis thaliana (Mouse-ear cress)	OE6A019177T1	Pathogenesis-related protein 5	-	-	-	YES	YES	YES	-
P1C72-PL	72_SP6_K23.ab1	-	-	-	-	-	-	-	-	-	-	-	-	-	-
P1C73-PL	73_SP6_M01.ab1	-	-	-	-	-	-	-	-	-	-	-	-	-	-
P1C74-PL	74_SP6_M03.ab1	-	-	-	-	-	-	-	-	-	-	-	-	-	-
P1C75-PL	75_SP6_M05.ab1	Protein TIFY 9 Arabidopsis thaliana (Mouse-ear cress)	3e-13	Q93ZM9	st11_olive_028233	Protein TIFY 9 Arabidopsis thaliana (Mouse-ear cress)	OE6A100067T2	Protein TIFY 9	-	-	-	YES	YES	-	-
P1C76-PL	76_SP6_M07.ab1	-	-	-	-	-	-	-	-	-	-	-	-	-	-
P1C77-PL	77_SP6_M09.ab1	-	-	-	st11_olive_025957	-	OE6A021045T3	Kynurenine formamidase	YES	YES	YES	-	-	YES	YES
P1C78-PL	78_SP6_M11.ab1	PLAT domain-containing protein 1 Arabidopsis thaliana (Mouse-ear cress)	1e-37	O65660	st11_olive_028321	Uncharacterized protein Erythranthe guttata (Yellow monkey flower) (Mimulus guttatus)	OE6A051813T1	Lipoxygenase homology domain-containing protein 1	YES	YES	YES	YES	YES	YES	-
P1C79-PL	79_SP6_M13.ab1	Thaumatin-like protein Arabidopsis thaliana (Mouse-ear cress)	4e-73	P50699	st11_olive_010105	Pathogenesis-related protein 5 Arabidopsis thaliana (Mouse-ear cress)	OE6A019177T1	Pathogenesis-related protein 5	-	-	-	YES	YES	YES	-
P1C80-PL	80_SP6_M15.ab1	-	-	-	-	-	-	-	-	-	-	-	-	-	-
P1C81-PL	81_SP6_M17.ab1	-	-	-	-	-	-	-	-	-	-	-	-	-	-
P1C82-PL	82_SP6_M19.ab1	-	-	-	st11_olive_009735	Putative uncharacterized protein Vitis vinifera (Grape)	OE6A093803T1	Protein ASPARTIC PROTEASE IN GUARD CELL 1	YES	-	-	-	-	-	-
P1C83-PL	83_SP6_M21.ab1	-	-	-	st11_olive_018271	60S ribosomal protein L10a-3 Arabidopsis thaliana (Mouse-ear cress)	OE6A113338T1	60S ribosomal protein L10a-1	-	-	-	-	-	-	-
P1C84-PL	84_SP6_M23.ab1	Glutathione S-transferase F9 Arabidopsis thaliana (Mouse-ear cress)	0	O80852	st11_olive_031590	Glutathione S-transferase F9 Arabidopsis thaliana (Mouse-ear cress)	OE6A103647T1	Glutathione S-transferase F9	-	-	-	-	-	-	-
P1C85-PL	85_SP6_O01.ab1	-	-	-	-	-	-	-	-	-	-	-	-	-	-
P1C86-PL	86_SP6_O03.ab1	-	-	-	-	-	-	-	-	-	-	-	-	-	-
P1C87-PL	87_SP6_O05.ab1	Aspartyl protease 25 Oryza sativa subsp. japonica (Rice)	4e-32	Q6F4N5	st11_olive_007571	Coffea canephora DH200=94 genomic scaffold, scaffold_152 Coffea canephora (Robusta coffee)	OE6A113059T1	Protein ASPARTIC PROTEASE IN GUARD CELL 2	-	-	-	YES	YES	YES	-
P1C88-PL	88_SP6_O07.ab1	Probable non-specific lipid-transfer protein AKCS9 Vigna unguiculata (Cowpea)	2e-22	Q43681	st11_olive_036439	Probable non-specific lipid-transfer protein AKCS9 Vigna unguiculata (Cowpea)	OE6A029951T1	60S acidic ribosomal protein P0	-	-	-	YES	YES	YES	-
P1C89-PL	89_SP6_O09.ab1	-	-	-	st11_olive_004433	Uncharacterized protein Erythranthe guttata (Yellow monkey flower) (Mimulus guttatus)	OE6A020493T3	Uncharacterized protein At1g04910	-	-	-	YES	YES	YES	YES
P1C90-PL	90_SP6_O11.ab1	-	-	-	-	-	-	-	-	-	-	-	-	-	-
P1C91-PL	91_SP6_O13.ab1	Probable non-specific lipid-transfer protein AKCS9 Vigna unguiculata (Cowpea)	1e-21	Q43681	st11_olive_036439	Probable non-specific lipid-transfer protein AKCS9 Vigna unguiculata (Cowpea)	OE6A029951T1	60S acidic ribosomal protein P0	-	-	-	-	-	-	-
P1C92-PL	92_SP6_O15.ab1	2 of P-loop NTPase domain-containing protein LPA1 Oryza sativa subsp. japonica GN=LPA1	1e-26	B9F4I8-2	st11_olive_001503	-	OE6A113458T4	Uncharacterized protein DDB_G0273453/DDB_G0273565	YES	YES	YES	-	YES	-	-
P1C93-PL	93_SP6_O17.ab1	-	-	-	-	-	-	-	-	-	-	-	-	-	-
P1C94-PL	94_SP6_O19.ab1	-	-	-	st11_olive_017534	-	OE6A106168T1	Putative late blight resistance protein homolog R1A-6	-	-	-	-	-	-	-
P1C95-PL	95_SP6_O21.ab1	-	-	-	-	-	-	-	-	-	-	-	-	-	-
P1C96-PL	96_SP6_O23.ab1	-	-	-	st11_olive_041941	Uncharacterized protein Erythranthe guttata (Yellow monkey flower) (Mimulus guttatus)	OE6A114410T1	Late embryogenesis abundant protein D-29	YES	YES	YES	-	YES	YES	-
P2C1-PL	1_SP6_B02.ab1	-	-	-	-	-	-	-	-	-	-	-	-	-	-
P2C2-PL	2_SP6_B04.ab1	Glutathione S-transferase L1 Arabidopsis thaliana (Mouse-ear cress)	1e-59	Q6NLB0	st11_olive_024171	Glutathione S-transferase L1 Arabidopsis thaliana (Mouse-ear cress)	OE6A018645T1	Glutathione S-transferase L3	-	-	YES	YES	YES	YES	-
P2C3-PL	3_SP6_B06.ab1	-	-	-	-	-	-	-	-	-	-	-	-	-	-
P2C4-PL	4_SP6_B08.ab1	Uncharacterized protein Citrus sinensis (Sweet orange) (Citrus aurantium var. sinensis)	1e-18	A0A067G2D3	st11_olive_017251	2 of Transcription factor BPE Arabidopsis thaliana GN=BPE	OE6A008589T2	Transcription factor bHLH79	-	-	-	YES	-	-	-
P2C5-PL	5_SP6_B10.ab1	Probable pectate lyase P59 Solanum lycopersicum (Tomato) (Lycopersicon esculentum)	2e-62	P15722	st11_olive_007511	Probable pectate lyase P59 Solanum lycopersicum (Tomato) (Lycopersicon esculentum)	OE6A095129T1	Probable pectate lyase P59	YES	YES	YES	-	YES	YES	-
P2C6-PL	6_SP6_B12.ab1	Histone H3.3a Lilium longiflorum (Trumpet lily)	2e-22	Q402E2	st11_olive_009573	Histone H3.3 Vitis vinifera (Grape)	OE6A011705T3	Protein SCAI	-	-	-	-	-	-	-
P2C7-PL	7_SP6_B14.ab1	-	-	-	-	-	-	-	-	-	-	-	-	-	-
P2C8-PL	8_SP6_B16.ab1	-	-	-	-	-	-	-	-	-	-	-	-	-	-
P2C9-PL	9_SP6_B18.ab1	-	-	-	st11_olive_026791	Subtilisin-like protease SDD1 Arabidopsis thaliana (Mouse-ear cress)	-	-	-	-	-	YES	YES	YES	-
P2C10-PL	10_SP6_B20.ab1	-	-	-	st11_olive_020719	-	OE6A035990T1	Protein NRT1/ PTR FAMILY 5.3	-	-	-	-	-	-	-
P2C11-PL	11_SP6_B22.ab1	Pathogenesis-related protein 5 Arabidopsis thaliana (Mouse-ear cress)	1e-62	P28493	st11_olive_016489	Pathogenesis-related protein 5 Arabidopsis thaliana (Mouse-ear cress)	OE6A051451T1	Pathogenesis-related protein 5	-	-	-	YES	YES	YES	-
P2C12-PL	12_SP6_B24.ab1	-	-	-	st11_olive_051444	-	-	-	-	-	-	-	-	-	-
P2C13-PL	13_SP6_D02.ab1	-	-	-	-	-	-	-	-	-	-	-	-	-	-
P2C14-PL	14_SP6_D04.ab1	-	-	-	st11_olive_046155	-	OE6A113022T1	Probable ubiquitin-conjugating enzyme E2 25	-	-	-	-	-	-	-
P2C15-PL	15_SP6_D06.ab1	Protein RALF-like 33 Arabidopsis thaliana (Mouse-ear cress)	2e-11	Q8L9P8	st11_olive_020153_split_1	Protein RALF-like 24 Arabidopsis thaliana (Mouse-ear cress)	-	-	-	-	-	YES	YES	YES	-
P2C16-PL	16_SP6_D08.ab1	-	-	-	st11_olive_000945	Endoplasmin homolog Catharanthus roseus (Madagascar periwinkle) (Vinca rosea)	OE6A119484T2	Endoplasmin homolog	-	-	-	YES	YES	-	YES
P2C17-PL	17_SP6_D10.ab1	-	-	-	-	-	-	-	-	-	-	-	-	-	-
P2C18-PL	18_SP6_D12.ab1	GDP-mannose 3,5-epimerase 2 Oryza sativa subsp. japonica (Rice)	2e-135	Q2R1V8	st11_olive_010021	GDP-mannose 3,5-epimerase 2 Oryza sativa subsp. japonica (Rice)	OE6A004844T1	GDP-mannose 3,5-epimerase 2	YES	YES	YES	YES	YES	-	YES
P2C19-PL	19_SP6_D14.ab1	Uncharacterized protein Erythranthe guttata (Yellow monkey flower) (Mimulus guttatus)	2e-110	A0A022PX55	st11_olive_013483	Uncharacterized protein Erythranthe guttata (Yellow monkey flower) (Mimulus guttatus)	OE6A004652T1	Exonuclease 3'-5' domain-containing protein 1	-	-	-	-	-	YES	-
P2C20-PL	20_SP6_D16.ab1	Methylesterase 1 Arabidopsis thaliana (Mouse-ear cress)	7e-48	Q8S8S9	st11_olive_011393	Methylesterase 1 Arabidopsis thaliana (Mouse-ear cress)	OE6A059030T1	Methylesterase 1	-	-	-	YES	YES	YES	-
P2C21-PL	21_SP6_D18.ab1	-	-	-	-	-	-	-	-	-	-	-	-	-	-
P2C22-PL	22_SP6_D20.ab1	-	-	-	-	-	-	-	-	-	-	-	-	-	-
P2C23-PL	23_SP6_D22.ab1	Uncharacterized protein Erythranthe guttata (Yellow monkey flower) (Mimulus guttatus)	3e-18	A0A022RXY9	st11_olive_024195	Probable adenylate kinase 7, mitochondrial Arabidopsis thaliana (Mouse-ear cress)	OE6A099855T2	Adenylate kinase 1, mitochondrial	-	-	-	-	-	-	-
P2C24-PL	24_SP6_D24.ab1	2 of Probable receptor-like serine/threonine-protein kinase At5g57670 Arabidopsis thaliana GN=At5g57670	7e-78	Q5XF57-2	st11_olive_053990	2 of Probable receptor-like serine/threonine-protein kinase At5g57670 Arabidopsis thaliana GN=At5g57670	OE6A032511T6	Probable receptor-like serine/threonine-protein kinase At5g57670	-	-	-	-	-	-	-
P2C25-PL	25_SP6_F02.ab1	Uncharacterized protein Erythranthe guttata (Yellow monkey flower) (Mimulus guttatus)	3e-44	A0A022RPA7	st11_olive_039955	Uncharacterized protein Solanum lycopersicum (Tomato) (Lycopersicon esculentum)	OE6A048969T1	Putative invertase inhibitor	-	-	-	YES	YES	YES	-
P2C26-PL	26_SP6_F04.ab1	-	-	-	-	-	-	-	-	-	-	-	-	-	-
P2C27-PL	27_SP6_F06.ab1	-	-	-	-	-	-	-	-	-	-	-	-	-	-
P2C28-PL	28_SP6_F08.ab1	Ubiquitin-60S ribosomal protein L40 Brassica rapa subsp. pekinensis (Chinese cabbage) (Brassica pekinensis)	2e-56	P51423	st11_olive_053163	Ubiquitin Avena sativa (Oat)	OE6A002921T2	Ubiquitin-60S ribosomal protein L40	-	-	-	-	-	-	-
P2C29-PL	29_SP6_F10.ab1	-	-	-	-	-	-	-	-	-	-	-	-	-	-
P2C30-PL	30_SP6_F12.ab1	-	-	-	-	-	-	-	-	-	-	-	-	-	-
P2C31-PL	31_SP6_F14.ab1	-	-	-	-	-	-	-	-	-	-	-	-	-	-
P2C32-PL	32_SP6_F16.ab1	-	-	-	-	-	-	-	-	-	-	-	-	-	-
P2C33-PL	33_SP6_F18.ab1	60S ribosomal protein L28-2 Arabidopsis thaliana (Mouse-ear cress)	6e-73	Q9M0E2	st11_olive_053895	60S ribosomal protein L28-2 Arabidopsis thaliana (Mouse-ear cress)	OE6A103451T2	60S ribosomal protein L28-2	-	YES	-	-	YES	YES	YES
P2C34-PL	34_SP6_F20.ab1	-	-	-	st11_olive_048685	Two-component response regulator ARR12 Arabidopsis thaliana (Mouse-ear cress)	OE6A064829T1	Two-component response regulator ARR12	-	-	-	-	-	-	-
P2C35-PL	35_SP6_F22.ab1	-	-	-	-	-	-	-	-	-	-	-	-	-	-
P2C36-PL	36_SP6_F24.ab1	-	-	-	st11_olive_017597	Spermidine hydroxycinnamoyl transferase Arabidopsis thaliana (Mouse-ear cress)	OE6A107980T1	Spermidine hydroxycinnamoyl transferase	-	-	-	YES	YES	YES	-
P2C37-PL	37_SP6_H02.ab1	Uncharacterized protein Coffea canephora (Robusta coffee)	2e-68	A0A068U8J4	st11_olive_031278	Coffea canephora DH200=94 genomic scaffold, scaffold_14 Coffea canephora (Robusta coffee)	OE6A104078T3	Oral cancer-overexpressed protein 1 homolog	-	-	-	-	-	-	-
P2C38-PL	38_SP6_H04.ab1	-	-	-	st11_olive_051444	-	OE6A046507T1	Cysteine proteinase inhibitor	-	-	-	-	-	-	-
P2C39-PL	39_SP6_H06.ab1	Thaumatin-like protein Arabidopsis thaliana (Mouse-ear cress)	2e-75	P50699	st11_olive_010105	Pathogenesis-related protein 5 Arabidopsis thaliana (Mouse-ear cress)	OE6A019177T1	Pathogenesis-related protein 5	-	-	-	YES	YES	YES	-
P2C40-PL	40_SP6_H08.ab1	-	-	-	st11_olive_040335	-	-	-	-	-	-	YES	YES	YES	-
P2C41-PL	41_SP6_H10.ab1	Thaumatin-like protein Actinidia deliciosa (Kiwi)	7e-41	P81370	st11_olive_015575	Thaumatin-like protein Actinidia deliciosa (Kiwi)	OE6A062898T1	Thaumatin-like protein	-	-	-	YES	YES	YES	YES
P2C42-PL	42_SP6_H12.ab1	-	-	-	st11_olive_051444	-	OE6A105660T1	Cysteine proteinase inhibitor	-	-	-	-	-	-	-
P2C43-PL	43_SP6_H14.ab1	Uncharacterized protein Nicotiana tabacum (Common tobacco) Mitochondrion	0	Q5M9Z4	st11_olive_039453	Uncharacterized protein	OE6A078861T1	Probable GPI-anchored adhesin-like protein PGA55	-	-	-	-	-	-	YES
P2C44-PL	44_SP6_H16.ab1	Putative pectinesterase/pectinesterase inhibitor 38 Arabidopsis thaliana (Mouse-ear cress)	1e-44	O81320	st11_olive_004373	Pectinesterase Erythranthe guttata (Yellow monkey flower) (Mimulus guttatus)	OE6A071540T1	Pectinesterase 4	YES	YES	YES	-	-	-	-
P2C45-PL	45_SP6_H18.ab1	-	-	-	-	-	-	-	-	-	-	-	-	-	-
P2C46-PL	46_SP6_H20.ab1	-	-	-	-	-	-	-	-	-	-	-	-	-	-
P2C47-PL	47_SP6_H22.ab1	-	-	-	-	-	-	-	-	-	-	-	-	-	-
P2C48-PL	48_SP6_H24.ab1	-	-	-	-	-	-	-	-	-	-	-	-	-	-
P2C49-PL	49_SP6_J02.ab1	Thaumatin-like protein Arabidopsis thaliana (Mouse-ear cress)	6e-73	P50699	st11_olive_016489	Pathogenesis-related protein 5 Arabidopsis thaliana (Mouse-ear cress)	OE6A051451T1	Pathogenesis-related protein 5	-	-	-	YES	YES	YES	-
P2C50-PL	50_SP6_J04.ab1	Thaumatin-like protein Arabidopsis thaliana (Mouse-ear cress)	1e-69	P50699	st11_olive_010105	Pathogenesis-related protein 5 Arabidopsis thaliana (Mouse-ear cress)	OE6A019177T1	Pathogenesis-related protein 5	-	-	-	YES	YES	YES	-
P2C51-PL	51_SP6_J06.ab1	-	-	-	st11_olive_020171	U-box domain-containing protein 34 Arabidopsis thaliana (Mouse-ear cress)	OE6A047406T1	U-box domain-containing protein 52	YES	YES	YES	-	-	-	-
P2C52-PL	52_SP6_J08.ab1	Putative ovule protein Solanum chacoense (Chaco potato)	1e-49	A0A0V0HCZ5	st11_olive_017015	U-box domain-containing protein 19 Arabidopsis thaliana (Mouse-ear cress)	OE6A100587T1	Probable receptor-like protein kinase At1g30570	-	-	-	-	-	-	-
P2C53-PL	53_SP6_J10.ab1	Pathogenesis-related protein 5 Arabidopsis thaliana (Mouse-ear cress)	1e-59	P28493	st11_olive_016489	Pathogenesis-related protein 5 Arabidopsis thaliana (Mouse-ear cress)	OE6A051451T1	Pathogenesis-related protein 5	-	-	-	YES	YES	YES	-
P2C54-PL	54_SP6_J12.ab1	-	-	-	st11_olive_043253	Uncharacterized protein Solanum lycopersicum (Tomato) (Lycopersicon esculentum)	OE6A059636T1	Eukaryotic initiation factor 4A-11	YES	YES	-	YES	YES	YES	-
P2C55-PL	55_SP6_J14.ab1	-	-	-	-	-	-	-	-	-	-	-	-	-	-
P2C56-PL	56_SP6_J16.ab1	-	-	-	-	-	-	-	-	-	-	-	-	-	-
P2C57-PL	57_SP6_J18.ab1	Uncharacterized protein Citrus sinensis (Sweet orange) (Citrus aurantium var. sinensis)	6e-66	A0A067FTS6	st11_olive_049357	Anthranilate synthase alpha subunit 1, chloroplastic Oryza sativa subsp. indica (Rice)	OE6A117469T2	Anthranilate synthase alpha subunit 1, chloroplastic	-	-	-	-	-	-	-
P2C58-PL	58_SP6_J20.ab1	Probable non-specific lipid-transfer protein AKCS9 Vigna unguiculata (Cowpea)	2e-22	Q43681	st11_olive_036439	Probable non-specific lipid-transfer protein AKCS9 Vigna unguiculata (Cowpea)	OE6A029951T1	60S acidic ribosomal protein P0	-	-	-	YES	YES	YES	-
P2C59-PL	59_SP6_J22.ab1	-	-	-	-	-	-	-	-	-	-	-	-	-	-
P2C60-PL	60_SP6_J24.ab1	-	-	-	-	-	-	-	-	-	-	-	-	-	-
P2C61-PL	61_SP6_L02.ab1	-	-	-	st11_olive_026791	Subtilisin-like protease SDD1 Arabidopsis thaliana (Mouse-ear cress)	-	-	-	-	-	YES	YES	YES	-
P2C62-PL	62_SP6_L04.ab1	-	-	-	st11_olive_047183	DNA-damage-repair/toleration protein DRT100 Arabidopsis thaliana (Mouse-ear cress)	OE6A010444T1	DNA-damage-repair/toleration protein DRT100	-	-	-	-	-	-	-
P2C63-PL	63_SP6_L06.ab1	-	-	-	-	-	-	-	-	-	-	-	-	-	-
P2C64-PL	64_SP6_L08.ab1	-	-	-	st11_olive_051444	-	OE6A105660T1	Cysteine proteinase inhibitor	-	-	-	-	-	-	-
P2C65-PL	65_SP6_L10.ab1	Pathogenesis-related protein 5 Arabidopsis thaliana (Mouse-ear cress)	6e-76	P28493	st11_olive_010105	Pathogenesis-related protein 5 Arabidopsis thaliana (Mouse-ear cress)	OE6A019177T1	Pathogenesis-related protein 5	-	-	-	YES	YES	YES	-
P2C66-PL	66_SP6_L12.ab1	-	-	-	st11_olive_051444	-	OE6A046507T1	Cysteine proteinase inhibitor	-	-	-	-	-	-	-
P2C67-PL	67_SP6_L14.ab1	Pathogenesis-related protein 5 Arabidopsis thaliana (Mouse-ear cress)	3e-73	P28493	st11_olive_016489	Pathogenesis-related protein 5 Arabidopsis thaliana (Mouse-ear cress)	OE6A051451T1	Pathogenesis-related protein 5	-	-	-	YES	YES	YES	-
P2C68-PL	68_SP6_L16.ab1	Putative ovule protein Solanum chacoense (Chaco potato)	2e-49	A0A0V0HUK0	st11_olive_025153	Uncharacterized protein Solanum tuberosum (Potato)	OE6A004362T2	Pentatricopeptide repeat-containing protein At3g20730	-	-	-	-	-	YES	-
P2C69-PL	69_SP6_L18.ab1	Pathogenesis-related protein 5 Arabidopsis thaliana (Mouse-ear cress)	6e-62	P28493	st11_olive_010105	Pathogenesis-related protein 5 Arabidopsis thaliana (Mouse-ear cress)	OE6A019177T1	Pathogenesis-related protein 5	-	-	-	YES	YES	YES	-
P2C70-PL	70_SP6_L20.ab1	-	-	-	-	-	-	-	-	-	-	-	-	-	-
P2C71-PL	71_SP6_L22.ab1	20 kDa chaperonin, chloroplastic Arabidopsis thaliana (Mouse-ear cress)	2e-47	O65282	st11_olive_022607	20 kDa chaperonin, chloroplastic Arabidopsis thaliana (Mouse-ear cress)	OE6A075722T2	20 kDa chaperonin, chloroplastic	-	-	-	YES	YES	YES	YES
P2C72-PL	72_SP6_L24.ab1	-	-	-	st11_olive_026791	Subtilisin-like protease SDD1 Arabidopsis thaliana (Mouse-ear cress)	-	-	-	-	-	YES	YES	YES	-
P2C73-PL	73_SP6_N02.ab1	50S ribosomal protein L36, chloroplastic Nicotiana tabacum (Common tobacco) Plastid Chloroplast	4e-07	P62118	st11_olive_009530	Translation initiation factor IF-1, chloroplastic Coffea arabica (Arabian coffee) Plastid Chloroplast	OE6A106900T1	NAD(P)H-quinone oxidoreductase subunit 2 A, chloroplastic	-	-	-	-	-	-	-
P2C74-PL	74_SP6_N04.ab1	Glyceraldehyde-3-phosphate dehydrogenase GAPA1, chloroplastic Arabidopsis thaliana (Mouse-ear cress)	4e-103	P25856	st11_olive_008499	Glyceraldehyde-3-phosphate dehydrogenase A, chloroplastic Pisum sativum (Garden pea)	OE6A056022T1	Glyceraldehyde-3-phosphate dehydrogenase A, chloroplastic	-	-	-	YES	YES	YES	YES
P2C75-PL	75_SP6_N06.ab1	1-aminocyclopropane-1-carboxylate oxidase homolog Solanum lycopersicum (Tomato) (Lycopersicon esculentum)	3e-45	P10967	st11_olive_012451	1-aminocyclopropane-1-carboxylate oxidase homolog 6 Arabidopsis thaliana (Mouse-ear cress)	OE6A077572T1	1-aminocyclopropane-1-carboxylate oxidase homolog 3	-	-	-	-	-	-	-
P2C76-PL	76_SP6_N08.ab1	-	-	-	st11_olive_006029	Omega-6 fatty acid desaturase, endoplasmic reticulum isozyme 2 Glycine max (Soybean) (Glycine hispida)	OE6A019200T1	Omega-6 fatty acid desaturase, endoplasmic reticulum isozyme 2	YES	YES	YES	YES	YES	YES	-
P2C77-PL	77_SP6_N10.ab1	Transcription initiation factor IIA subunit 2 Arabidopsis thaliana (Mouse-ear cress)	9e-12	Q39236	st11_olive_050255	Transcription initiation factor IIA subunit 2 Arabidopsis thaliana (Mouse-ear cress)	OE6A092536T3	Transcription initiation factor IIA subunit 2	-	-	-	-	YES	YES	-
P2C78-PL	78_SP6_N12.ab1	-	-	-	-	-	-	-	-	-	-	-	-	-	-
P2C79-PL	79_SP6_N14.ab1	-	-	-	-	-	-	-	-	-	-	-	-	-	-
P2C80-PL	80_SP6_N16.ab1	-	-	-	st11_olive_051444	-	OE6A046507T1	Cysteine proteinase inhibitor	-	-	-	-	-	-	-
P2C81-PL	81_SP6_N18.ab1	Thaumatin-like protein Arabidopsis thaliana (Mouse-ear cress)	5e-77	P50699	st11_olive_010105	Pathogenesis-related protein 5 Arabidopsis thaliana (Mouse-ear cress)	OE6A019177T1	Pathogenesis-related protein 5	-	-	-	YES	YES	YES	-
P2C82-PL	82_SP6_N20.ab1	Cysteine proteinase inhibitor Musa acuminata subsp. malaccensis (Wild banana) (Musa malaccensis)	1e-06	M0RR15	st11_olive_051444	-	OE6A105660T1	Cysteine proteinase inhibitor	-	-	-	-	-	-	-
P2C83-PL	83_SP6_N22.ab1	-	-	-	-	-	-	-	-	-	-	-	-	-	-
P2C84-PL	84_SP6_N24.ab1	Probable non-specific lipid-transfer protein AKCS9 Vigna unguiculata (Cowpea)	2e-21	Q43681	st11_olive_036439	Probable non-specific lipid-transfer protein AKCS9 Vigna unguiculata (Cowpea)	OE6A029951T1	60S acidic ribosomal protein P0	-	-	-	YES	YES	YES	-
P2C85-PL	85_SP6_P02.ab1	-	-	-	st11_olive_026444	Inorganic phosphate transporter 1-4 Arabidopsis thaliana (Mouse-ear cress)	OE6A098387T1	Probable inorganic phosphate transporter 1-7	YES	YES	YES	-	-	-	-
P2C86-PL	86_SP6_P04.ab1	Pathogenesis-related protein 5 Arabidopsis thaliana (Mouse-ear cress)	5e-71	P28493	st11_olive_010105	Pathogenesis-related protein 5 Arabidopsis thaliana (Mouse-ear cress)	OE6A019177T1	Pathogenesis-related protein 5	-	-	-	YES	YES	YES	-
P2C87-PL	87_SP6_P06.ab1	-	-	-	-	-	-	-	-	-	-	-	-	-	-
P2C88-PL	88_SP6_P08.ab1	-	-	-	st11_olive_051444	-	OE6A046507T1	Cysteine proteinase inhibitor	-	-	-	-	-	-	-
P2C89-PL	89_SP6_P10.ab1	Pathogenesis-related protein 5 Arabidopsis thaliana (Mouse-ear cress)	6e-69	P28493	st11_olive_016489	Pathogenesis-related protein 5 Arabidopsis thaliana (Mouse-ear cress)	OE6A051451T1	Pathogenesis-related protein 5	-	-	-	YES	YES	YES	-
P2C90-PL	90_SP6_P12.ab1	(S)-hydroxynitrile lyase Hevea brasiliensis (Para rubber tree) (Siphonia brasiliensis)	2e-33	P52704	st11_olive_046683	Salicylic acid-binding protein 2 Nicotiana tabacum (Common tobacco)	OE6A059030T1	Methylesterase 1	-	-	-	YES	YES	YES	YES
P2C91-PL	91_SP6_P14.ab1	-	-	-	-	-	-	-	-	-	-	-	-	-	-
P2C92-PL	92_SP6_P16.ab1	-	-	-	st11_olive_051444	-	OE6A046507T1	Cysteine proteinase inhibitor	-	-	-	-	-	-	-
P2C93-PL	93_SP6_P18.ab1	40S ribosomal protein S25 Solanum lycopersicum (Tomato) (Lycopersicon esculentum)	5e-41	P46301	st11_olive_058566	40S ribosomal protein S25 Solanum lycopersicum (Tomato) (Lycopersicon esculentum)	OE6A041090T1	40S ribosomal protein S25	-	-	-	-	-	YES	-
P2C94-PL	94_SP6_P20.ab1	Serine/threonine-protein kinase AGC1-5 Arabidopsis thaliana (Mouse-ear cress)	0	Q9LTW5	st11_olive_058150	Serine/threonine-protein kinase D6PKL2 Arabidopsis thaliana (Mouse-ear cress)	OE6A020963T1	Protein kinase PVPK-1	YES	-	YES	-	-	-	-
P2C95-PL	95_SP6_P22.ab1	Pathogenesis-related protein 5 Arabidopsis thaliana (Mouse-ear cress)	2e-56	P28493	st11_olive_016489	Pathogenesis-related protein 5 Arabidopsis thaliana (Mouse-ear cress)	OE6A051451T1	Pathogenesis-related protein 5	-	-	-	YES	YES	YES	-
P2C96-PL	96_SP6_P24.ab1	Heavy metal-associated isoprenylated plant protein 37 Arabidopsis thaliana (Mouse-ear cress)	8e-05	A2RVM8	st11_olive_045084	Uncharacterized protein Prunus persica (Peach) (Amygdalus persica)	OE6A112598T4	Copper transport protein ATX1	-	-	-	-	-	-	-
