# Supplementary material for: Identification and Functional Annotation of Genes Differentially Expressed in the Reproductive Tissues of the Olive Tree (Olea europaea L.) through the Generation of Subtractive Libraries
Source: Front Plant Sci. 2017 Sep 13;8:1576. doi: 10.3389/fpls.2017.01576 (PMC5601413; doi:10.3389/fpls.2017.01576)
Supplement: Supplementary file 12 [file Table12.XLSX]

## Sheet: T_Leaf__D_Pollen_table_complete
L(Po)		FULL-LengtherNext ANNOTATION			REPROLIVE		CRUZ		BLAST WITH Roche/454 READS
Sample	Fastq_id	Description	e-value	Subject_id	leaf_transc_id	leaf_description	cruz_transc_id	cruz_description	pollen_mature	pollen_germ_1h	pollen_germ_5h30min	pistil_stage2	pistil_stage3	pistil_stage4	leaf			Rejected by SeqTrimNext
P1C1-LPo	1_SP6_A02.ab1	-	-	-	-	-	-	-	-	-	-	-	-	-	-
P1C2-LPo	2_SP6_A04.ab1	Putative uncharacterized protein Vitis vinifera (Grape)	1e-38	D7SJD3	vg11_olive_011792	CDPK-related kinase 6 Arabidopsis thaliana (Mouse-ear cress)	OE6A086671T2	Asparagine--tRNA ligase, chloroplastic/mitochondrial	-	-	-	-	-	-	-
P1C3-LPo	3_SP6_A06.ab1	-	-	-	-	-	-	-	-	-	-	-	-	-	-
P1C4-LPo	4_SP6_A08.ab1	-	-	-	vg11_olive_002968	WPP domain-associated protein Arabidopsis thaliana (Mouse-ear cress)	OE6A047321T7	WPP domain-associated protein	-	-	-	-	-	-	-
P1C5-LPo	5_SP6_A10.ab1	-	-	-	-	-	-	-	-	-	-	-	-	-	-
P1C6-LPo	6_SP6_A12.ab1	-	-	-	vg11_olive_013802	-	OE6A027104T1	Probable disease resistance protein At1g12280	-	-	-	-	-	-	-
P1C7-LPo	7_SP6_A14.ab1	-	-	-	-	-	-	-	-	-	-	-	-	-	-
P1C8-LPo	8_SP6_A16.ab1	-	-	-	-	-	-	-	-	-	-	-	-	-	-
P1C9-LPo	9_SP6_A18.ab1	-	-	-	vg11_olive_001183	Uncharacterized protein Solanum tuberosum (Potato)	OE6A033025T1	Protein BZR1 homolog 2	-	-	-	YES	-	YES	YES
P1C10-LPo	10_SP6_A20.ab1	-	-	-	-	-	-	-	-	-	-	-	-	-	-
P1C11-LPo	11_SP6_A22.ab1	1-aminocyclopropane-1-carboxylate oxidase Actinidia deliciosa (Kiwi)	2e-49	P31237	vg11_olive_003320	1-aminocyclopropane-1-carboxylate oxidase Actinidia deliciosa (Kiwi)	OE6A066037T2	1-aminocyclopropane-1-carboxylate oxidase	-	-	-	-	-	-	-
P1C12-LPo	12_SP6_A24.ab1	-	-	-	vg11_olive_000363	Ribulose bisphosphate carboxylase/oxygenase activase, chloroplastic Oryza sativa subsp. japonica (Rice)	OE6A110201T1	Ribulose bisphosphate carboxylase/oxygenase activase 1, chloroplastic	-	-	-	YES	YES	YES	YES
P1C13-LPo	13_SP6_C02.ab1	Mitogen-activated protein kinase 3 Arabidopsis thaliana (Mouse-ear cress)	5e-79	Q39023	vg11_olive_000555	Mitogen-activated protein kinase 3 Arabidopsis thaliana (Mouse-ear cress)	OE6A004696T1	Mitogen-activated protein kinase 3	-	-	-	YES	YES	-	-
P1C14-LPo	14_SP6_C04.ab1	Uncharacterized protein Zea mays (Maize)	2e-84	K7U0P2	vg11_olive_000027	Aconitate hydratase, cytoplasmic Cucurbita maxima (Pumpkin) (Winter squash)	OE6A070007T3	Aconitate hydratase 2, mitochondrial	-	-	-	YES	YES	YES	YES
P1C15-LPo	15_SP6_C06.ab1	-	-	-	-	-	-	-	-	-	-	-	-	-	-
P1C16-LPo	16_SP6_C08.ab1	-	-	-	-	-	-	-	-	-	-	-	-	-	-
P1C17-LPo	17_SP6_C10.ab1	-	-	-	vg11_olive_008285	-	OE6A040097T2	Transmembrane protein 245	-	YES	-	YES	YES	-	-
P1C18-LPo	18_SP6_C12.ab1	Putative uncharacterized protein Vitis vinifera (Grape)	3e-30	D7TDI6	vg11_olive_006538	Putative uncharacterized protein Vitis vinifera (Grape)	OE6A093537T1	Uncharacterized protein At2g39910	-	-	-	-	-	-	-
P1C19-LPo	19_SP6_C14.ab1	-	-	-	-	-	-	-	-	-	-	-	-	-	-
P1C20-LPo	20_SP6_C16.ab1	-	-	-	-	-	-	-	-	-	-	-	-	-	-
P1C21-LPo	21_SP6_C18.ab1	Fructose-bisphosphate aldolase Coffea canephora (Robusta coffee)	6e-54	A0A068TL79	vg11_olive_000647	Probable fructose-bisphosphate aldolase 2, chloroplastic Arabidopsis thaliana (Mouse-ear cress)	OE6A031770T2	Probable fructose-bisphosphate aldolase 2, chloroplastic	-	-	-	YES	YES	YES	YES
P1C22-LPo	22_SP6_C20.ab1	2 of Glyceraldehyde-3-phosphate dehydrogenase GAPA2, chloroplastic Arabidopsis thaliana GN=GAPA2	3e-92	Q9LPW0-2	vg11_olive_002805	Glyceraldehyde-3-phosphate dehydrogenase GAPA1, chloroplastic Arabidopsis thaliana (Mouse-ear cress)	OE6A004414T2	Glyceraldehyde-3-phosphate dehydrogenase A, chloroplastic	-	-	-	YES	YES	YES	YES
P1C23-LPo	23_SP6_C22.ab1	Nucleic acid binding protein, putative Ricinus communis (Castor bean)	6e-12	B9S0N0	-	-	OE6A033320T2	Zinc finger protein JACKDAW	-	-	-	-	-	-	-
P1C24-LPo	24_SP6_C24.ab1	Catalase Helianthus annuus (Common sunflower)	4e-76	P45739	vg11_olive_000229	Catalase isozyme 1 Gossypium hirsutum (Upland cotton) (Gossypium mexicanum)	OE6A048265T5	Catalase isozyme 1	YES	YES	YES	YES	YES	YES	YES
P1C25-LPo	25_SP6_E02.ab1	-	-	-	vg11_olive_037321	Fructose-bisphosphate aldolase, chloroplastic Spinacia oleracea (Spinach)	OE6A072480T1	Probable fructose-bisphosphate aldolase 2, chloroplastic	-	-	-	-	-	-	-
P1C26-LPo	26_SP6_E04.ab1	-	-	-	-	-	-	-	-	-	-	-	-	-	-
P1C27-LPo	27_SP6_E06.ab1	-	-	-	-	-	-	-	-	-	-	-	-	-	-
P1C28-LPo	28_SP6_E08.ab1	-	-	-	-	-	-	-	-	-	-	-	-	-	-
P1C29-LPo	29_SP6_E10.ab1	Sedoheptulose-1,7-bisphosphatase, chloroplastic Triticum aestivum (Wheat)	2e-80	P46285	vg11_olive_002351	Sedoheptulose-1,7-bisphosphatase, chloroplastic Spinacia oleracea (Spinach)	OE6A083015T2	Sedoheptulose-1,7-bisphosphatase, chloroplastic	-	-	-	YES	YES	YES	YES
P1C30-LPo	30_SP6_E12.ab1	Nicotinamidase 2 Arabidopsis thaliana (Mouse-ear cress)	9e-37	Q9FMX7	vg11_olive_001870	Uncharacterized protein Solanum tuberosum (Potato)	OE6A096398T1	Isochorismatase	-	-	-	-	-	-	-
P1C31-LPo	31_SP6_E14.ab1	NADP-dependent glyceraldehyde-3-phosphate dehydrogenase Nicotiana plumbaginifolia (Leadwort-leaved tobacco) (Tex-Mex tobacco)	2e-86	P93338	vg11_olive_002405	NADP-dependent glyceraldehyde-3-phosphate dehydrogenase Arabidopsis thaliana (Mouse-ear cress)	OE6A027234T2	NADP-dependent glyceraldehyde-3-phosphate dehydrogenase	-	-	-	YES	YES	YES	YES
P1C32-LPo	32_SP6_E16.ab1	-	-	-	vg11_olive_012562	Uncharacterized protein Erythranthe guttata (Yellow monkey flower) (Mimulus guttatus)	OE6A085975T9	Lysine-specific demethylase 5B-B	-	-	-	YES	YES	YES	YES
P1C33-LPo	33_SP6_E18.ab1	-	-	-	-	-	-	-	-	-	-	-	-	-	-
P1C34-LPo	34_SP6_E20.ab1	Chlorophyll a-b binding protein 21, chloroplastic Nicotiana tabacum (Common tobacco)	2e-145	P27493	vg11_olive_000010	Chlorophyll a-b binding protein AB10, chloroplastic Malus domestica (Apple) (Pyrus malus)	OE6A081417T1	Chlorophyll a-b binding protein 21, chloroplastic	-	-	-	YES	YES	YES	YES
P1C35-LPo	35_SP6_E22.ab1	-	-	-	-	-	-	-	-	-	-	-	-	-	-
P1C36-LPo	36_SP6_E24.ab1	CRAL-TRIO domain-containing protein Cynara cardunculus var. scolymus (Artichoke) (Cynara scolymus)	1e-70	A0A118JTE4	vg11_olive_017243	Patellin-5 Arabidopsis thaliana (Mouse-ear cress)	OE6A001588T1	Patellin-3	-	-	-	-	YES	-	-
P1C37-LPo	37_SP6_G02.ab1	-	-	-	-	-	-	-	-	-	-	-	-	-	-
P1C38-LPo	38_SP6_G04.ab1	-	-	-	-	-	-	-	-	-	-	-	-	-	-
P1C39-LPo	39_SP6_G06.ab1	Sedoheptulose-1,7-bisphosphatase, chloroplastic Spinacia oleracea (Spinach)	2e-106	O20252	vg11_olive_002351	Sedoheptulose-1,7-bisphosphatase, chloroplastic Spinacia oleracea (Spinach)	OE6A083015T2	Sedoheptulose-1,7-bisphosphatase, chloroplastic	-	-	-	-	-	YES	YES
P1C40-LPo	40_SP6_G08.ab1	NADH dehydrogenase [ubiquinone] 1 beta subcomplex subunit 7 Arabidopsis thaliana (Mouse-ear cress)	2e-47	Q9SKC9	vg11_olive_022964	NADH dehydrogenase [ubiquinone] 1 beta subcomplex subunit 7 Arabidopsis thaliana (Mouse-ear cress)	OE6A002353T1	NADH dehydrogenase [ubiquinone] 1 beta subcomplex subunit 7	-	-	-	-	-	-	-
P1C41-LPo	41_SP6_G10.ab1	-	-	-	vg11_olive_000389	Primary amine oxidase Arabidopsis thaliana (Mouse-ear cress)	OE6A034561T2	Primary amine oxidase	-	-	-	YES	YES	YES	YES
P1C42-LPo	42_SP6_G12.ab1	-	-	-	vg11_olive_000879	Catalase isozyme 1 Gossypium hirsutum (Upland cotton) (Gossypium mexicanum)	OE6A048265T2	Catalase isozyme 3	-	-	-	YES	YES	YES	YES
P1C43-LPo	43_SP6_G14.ab1	NAD(P)H-quinone oxidoreductase subunit 5, chloroplastic Ligustrum vulgare (Common privet) (Ligustrum insulare) Plastid Chloroplast	1e-121	Q9TLA3	vg11_olive_032436	NAD(P)H-quinone oxidoreductase subunit 5, chloroplastic Ligustrum vulgare (Common privet) (Ligustrum insulare) Plastid Chloroplast	OE6A045734T1	LOB domain-containing protein 37	-	-	-	-	-	-	-
P1C44-LPo	44_SP6_G16.ab1	ESCRT-related protein CHMP1B Arabidopsis thaliana (Mouse-ear cress)	5e-73	Q9SSM4	vg11_olive_025653	Coffea canephora DH200=94 genomic scaffold, scaffold_2 Coffea canephora (Robusta coffee)	OE6A089436T1	Charged multivesicular body protein 1b	-	YES	-	-	YES	YES	-
P1C45-LPo	45_SP6_G18.ab1	-	-	-	-	-	-	-	-	-	-	-	-	-	-
P1C46-LPo	46_SP6_G20.ab1	-	-	-	-	-	-	-	-	-	-	-	-	-	-
P1C47-LPo	47_SP6_G22.ab1	Uncharacterized protein Cynara cardunculus var. scolymus (Artichoke) (Cynara scolymus)	1e-15	A0A103XVT9	-	-	OE6A031392T1	Protein Brevis radix-like 4	-	-	-	-	-	YES	-
P1C48-LPo	48_SP6_G24.ab1	-	-	-	-	-	-	-	-	-	-	-	-	-	-
P1C49-LPo	49_SP6_I02.ab1	-	-	-	-	-	-	-	-	-	-	-	-	-	-
P1C50-LPo	50_SP6_I04.ab1	Metallothionein-like protein type 3 Actinidia deliciosa (Kiwi)	0	P43389	vg11_olive_006108	Metallothionein-like protein type 3 Actinidia deliciosa (Kiwi)	OE6A111596T1	Metallothionein-like protein type 3	-	-	-	-	-	-	-
P1C51-LPo	51_SP6_I06.ab1	1-acylglycerol-3-phosphate O-acyltransferase Arabidopsis thaliana (Mouse-ear cress)	5e-105	O22975	vg11_olive_008411	1-acylglycerol-3-phosphate O-acyltransferase Arabidopsis thaliana (Mouse-ear cress)	OE6A032412T2	Abhydrolase domain-containing protein 4	-	-	YES	YES	-	-	-
P1C52-LPo	52_SP6_I08.ab1	-	-	-	-	-	-	-	-	-	-	-	-	-	-
P1C53-LPo	53_SP6_I10.ab1	Protein EMSY-LIKE 4 Arabidopsis thaliana (Mouse-ear cress)	1e-33	Q08A72	vg11_olive_026990	-	OE6A086663T3	Splicing factor U2af small subunit B	-	-	-	-	-	-	-
P1C54-LPo	54_SP6_I12.ab1	Uncharacterized protein Citrus sinensis (Sweet orange) (Citrus aurantium var. sinensis)	3e-48	A0A067DCX3	vg11_olive_002940	Heat shock cognate 70 kDa protein 2 Solanum lycopersicum (Tomato) (Lycopersicon esculentum)	OE6A069005T1	Heat shock cognate 70 kDa protein	-	-	-	YES	YES	YES	-
P1C55-LPo	55_SP6_I14.ab1	-	-	-	vg11_olive_000093	Probable protein phosphatase 2C 6 Oryza sativa subsp. japonica (Rice)	OE6A081712T4	Protein phosphatase 2C 7	-	-	-	-	-	-	-
P1C56-LPo	56_SP6_I16.ab1	-	-	-	-	-	-	-	-	-	-	-	-	-	-
P1C57-LPo	57_SP6_I18.ab1	Protein CPR-5 Arabidopsis thaliana (Mouse-ear cress)	0.36	Q9LV85	vg11_olive_006618	Protein CPR-5 Arabidopsis thaliana (Mouse-ear cress)	OE6A079588T1	Probable transporter MCH1	-	-	-	-	-	-	-
P1C58-LPo	58_SP6_I20.ab1	-	-	-	-	-	-	-	-	-	-	-	-	-	-
P1C59-LPo	59_SP6_I22.ab1	Dehydrin Rab15 Triticum aestivum (Wheat)	1e-09	Q00742	vg11_olive_024464	Dehydrin Rab15 Triticum aestivum (Wheat)	OE6A066286T1	Dehydrin DHN1	-	-	-	-	-	-	-
P1C60-LPo	60_SP6_I24.ab1	Protein CURVATURE THYLAKOID 1A, chloroplastic Arabidopsis thaliana (Mouse-ear cress)	1e-09	O04616	vg11_olive_017041	Protein CURVATURE THYLAKOID 1A, chloroplastic Arabidopsis thaliana (Mouse-ear cress)	OE6A082071T1	Protein CURVATURE THYLAKOID 1A, chloroplastic	-	-	-	-	-	-	-
P1C61-LPo	61_SP6_K02.ab1	-	-	-	-	-	-	-	-	-	-	-	-	-	-
P1C62-LPo	62_SP6_K04.ab1	-	-	-	-	-	-	-	-	-	-	-	-	-	-
P1C63-LPo	63_SP6_K06.ab1	-	-	-	-	-	-	-	-	-	-	-	-	-	-
P1C64-LPo	64_SP6_K08.ab1	-	-	-	vg11_olive_029189	Photosystem II CP47 chlorophyll apoprotein Euglena gracilis. Plastid Chloroplast	OE6A038394T1	Photosystem II CP47 chlorophyll apoprotein	-	-	-	-	-	-	YES
P1C65-LPo	65_SP6_K10.ab1	Photosystem I reaction center subunit II, chloroplastic Nicotiana sylvestris (Wood tobacco) (South American tobacco)	4e-64	P29302	vg11_olive_010865	Photosystem I reaction center subunit II, chloroplastic Solanum lycopersicum (Tomato) (Lycopersicon esculentum)	OE6A104794T1	Photosystem I reaction center subunit II, chloroplastic	-	-	-	YES	YES	YES	YES
P1C66-LPo	66_SP6_K12.ab1	-	-	-	vg11_olive_000901	Probable mediator of RNA polymerase II transcription subunit 37c Arabidopsis thaliana (Mouse-ear cress)	OE6A033723T1	Heat shock cognate 70 kDa protein 2	-	-	-	YES	YES	YES	YES
P1C67-LPo	67_SP6_K14.ab1	Chlorophyll a-b binding protein 7, chloroplastic Solanum lycopersicum (Tomato) (Lycopersicon esculentum)	2e-39	P10708	vg11_olive_007481	Chlorophyll a-b binding protein 7, chloroplastic Solanum lycopersicum (Tomato) (Lycopersicon esculentum)	OE6A092384T3	Chlorophyll a-b binding protein 7, chloroplastic	-	-	-	YES	-	YES	YES
P1C68-LPo	68_SP6_K16.ab1	4-coumarate--CoA ligase-like 5 Arabidopsis thaliana (Mouse-ear cress)	8e-64	Q84P21	vg11_olive_015999	4-coumarate--CoA ligase-like 5 Arabidopsis thaliana (Mouse-ear cress)	OE6A093659T1	4-coumarate--CoA ligase-like 5	-	-	-	-	-	-	-
P1C69-LPo	69_SP6_K18.ab1	Thiamine thiazole synthase, chloroplastic Citrus sinensis (Sweet orange) (Citrus aurantium var. sinensis)	1e-66	O23787	vg11_olive_003531	Thiamine thiazole synthase 2, chloroplastic Vitis vinifera (Grape)	OE6A056967T1	Thiamine thiazole synthase 2, chloroplastic	-	-	-	-	YES	-	-
P1C70-LPo	70_SP6_K20.ab1	ERBB-3 BINDING PROTEIN 1 Solanum tuberosum (Potato)	5e-96	M1CZC0	vg11_olive_009926	Uncharacterized protein Glycine max (Soybean) (Glycine hispida)	OE6A093775T8	Proliferation-associated protein 2G4	-	-	-	-	-	-	-
P1C71-LPo	71_SP6_K22.ab1	L-lactate dehydrogenase A Hordeum vulgare (Barley)	2e-51	P22988	vg11_olive_008023	L-lactate dehydrogenase Zea mays (Maize)	OE6A093693T1	L-lactate dehydrogenase A	-	-	-	YES	YES	YES	YES
P1C72-LPo	72_SP6_K24.ab1	Protein NRT1/ PTR FAMILY 2.13 Arabidopsis thaliana (Mouse-ear cress)	1e-46	Q8RX77	vg11_olive_009203	Uncharacterized protein Erythranthe guttata (Yellow monkey flower) (Mimulus guttatus)	OE6A070478T2	Protein NRT1/ PTR FAMILY 2.13	-	-	-	YES	YES	-	YES
P1C73-LPo	73_SP6_M02.ab1	-	-	-	vg11_olive_022415	RNA polymerase sigma factor sigA Arabidopsis thaliana (Mouse-ear cress)	OE6A028647T7	RNA polymerase sigma factor sigA	-	-	-	-	-	YES	-
P1C74-LPo	74_SP6_M04.ab1	Oxygen-evolving enhancer protein 1, chloroplastic Solanum tuberosum (Potato)	2e-54	P26320	vg11_olive_004417	Oxygen-evolving enhancer protein 1, chloroplastic Nicotiana tabacum (Common tobacco)	OE6A041639T1	Oxygen-evolving enhancer protein 1, chloroplastic	-	-	-	YES	YES	YES	YES
P1C75-LPo	75_SP6_M06.ab1	50S ribosomal protein L24, chloroplastic Nicotiana tabacum (Common tobacco)	9e-60	Q02764	vg11_olive_032982	50S ribosomal protein L24, chloroplastic Nicotiana tabacum (Common tobacco)	OE6A096310T1	50S ribosomal protein L24, chloroplastic	-	-	-	-	-	-	YES
P1C76-LPo	76_SP6_M08.ab1	-	-	-	-	-	OE6A088961T1	Protein vip1	-	-	-	-	-	-	-
P1C77-LPo	77_SP6_M10.ab1	-	-	-	-	-	-	-	-	-	-	-	-	-	-
P1C78-LPo	78_SP6_M12.ab1	-	-	-	-	-	-	-	-	-	-	-	-	-	-
P1C79-LPo	79_SP6_M14.ab1	-	-	-	-	-	-	-	-	-	-	-	-	-	-
P1C80-LPo	80_SP6_M16.ab1	Granule-bound starch synthase 1, chloroplastic/amyloplastic Solanum tuberosum (Potato)	2e-74	Q00775	vg11_olive_000823	Granule-bound starch synthase 1, chloroplastic/amyloplastic Solanum tuberosum (Potato)	OE6A104392T5	Granule-bound starch synthase 1, chloroplastic/amyloplastic	-	-	-	-	-	-	-
P1C81-LPo	81_SP6_M18.ab1	-	-	-	vg11_olive_002555	Beta-glucosidase 24 Oryza sativa subsp. japonica (Rice)	OE6A014603T8	Raucaffricine-O-beta-D-glucosidase	-	-	-	YES	YES	YES	YES
P1C82-LPo	82_SP6_M20.ab1	Probable aminotransferase Olea europaea (Common olive)	2e-67	A0A1C9ZM76	vg11_olive_001646	Probable aminotransferase TAT2 Arabidopsis thaliana (Mouse-ear cress)	OE6A028748T3	Probable aminotransferase TAT2	-	-	YES	-	-	-	-
P1C83-LPo	83_SP6_M22.ab1	-	-	-	vg11_olive_030560	Peptidyl-prolyl cis-trans isomerase FKBP16-4, chloroplastic Arabidopsis thaliana (Mouse-ear cress)	OE6A061861T1	Peptidyl-prolyl cis-trans isomerase FKBP16-4, chloroplastic	-	-	-	-	YES	-	-
P1C84-LPo	84_SP6_M24.ab1	-	-	-	-	-	-	-	-	-	-	-	-	-	-
P1C85-LPo	85_SP6_O02.ab1	Uncharacterized protein Solanum tuberosum (Potato)	2e-60	M1A8C4	vg11_olive_006589	Serine/threonine-protein kinase STN7, chloroplastic Arabidopsis thaliana (Mouse-ear cress)	OE6A101085T1	Serine/threonine-protein kinase STN7, chloroplastic	-	-	-	-	-	-	-
P1C86-LPo	86_SP6_O04.ab1	ERBB-3 BINDING PROTEIN 1 Solanum tuberosum (Potato)	5e-96	M1CZC0	vg11_olive_009926	Uncharacterized protein Glycine max (Soybean) (Glycine hispida)	OE6A093775T8	Proliferation-associated protein 2G4	-	-	-	-	-	-	-
P1C87-LPo	87_SP6_O06.ab1	Auxin-binding protein ABP20 Prunus persica (Peach) (Amygdalus persica)	3e-55	O04011	vg11_olive_009936	Auxin-binding protein ABP20 Prunus persica (Peach) (Amygdalus persica)	OE6A036310T1	Auxin-binding protein ABP20	-	-	-	-	-	-	YES
P1C88-LPo	88_SP6_O08.ab1	20 kDa chaperonin, chloroplastic Arabidopsis thaliana (Mouse-ear cress)	4e-09	O65282	vg11_olive_005148_split_0	20 kDa chaperonin, chloroplastic Arabidopsis thaliana (Mouse-ear cress)	OE6A075722T2	20 kDa chaperonin, chloroplastic	-	-	-	-	-	-	-
P1C89-LPo	89_SP6_O10.ab1	Ribulose bisphosphate carboxylase/oxygenase activase B, chloroplastic Hordeum vulgare (Barley)	1e-88	Q42450	vg11_olive_000018	Ribulose bisphosphate carboxylase/oxygenase activase, chloroplastic Malus domestica (Apple) (Pyrus malus)	OE6A110201T1	Ribulose bisphosphate carboxylase/oxygenase activase 1, chloroplastic	-	-	-	YES	YES	YES	YES
P1C90-LPo	90_SP6_O12.ab1	-	-	-	-	-	-	-	-	-	-	-	-	-	-
P1C91-LPo	91_SP6_O14.ab1	-	-	-	-	-	-	-	-	-	-	-	-	-	-
P1C92-LPo	92_SP6_O16.ab1	-	-	-	-	-	-	-	-	-	-	-	-	-	-
P1C93-LPo	93_SP6_O18.ab1	-	-	-	vg11_olive_027799	Uncharacterized protein Erythranthe guttata (Yellow monkey flower) (Mimulus guttatus)	OE6A044202T5	Uncharacterized protein At5g08430	-	-	-	-	YES	-	YES
P1C94-LPo	94_SP6_O20.ab1	-	-	-	vg11_olive_001154	-	OE6A034382T2	Uncharacterized protein At2g37660, chloroplastic	-	-	-	-	-	-	-
P1C95-LPo	95_SP6_O22.ab1	Protein indeterminate-domain 12 Arabidopsis thaliana (Mouse-ear cress)	4e-15	O22759	vg11_olive_010342	2 of Zinc finger protein MAGPIE Arabidopsis thaliana GN=MGP	OE6A071998T4	Zinc finger protein JACKDAW	-	-	-	-	-	YES	-
P1C96-LPo	96_SP6_O24.ab1	-	-	-	vg11_olive_010342	2 of Zinc finger protein MAGPIE Arabidopsis thaliana GN=MGP	OE6A071998T4	Zinc finger protein JACKDAW	-	-	-	-	-	YES	-
P2C1-LPo	1_SP6_B02.ab1	-	-	-	-	-	-	-	-	-	-	-	-	-	-
P2C2-LPo	2_SP6_B04.ab1	-	-	-	vg11_olive_037430	UDP-glycosyltransferase 74E2 Arabidopsis thaliana (Mouse-ear cress)	OE6A046733T5	UDP-glycosyltransferase 74F2	-	-	-	YES	YES	YES	YES
P2C3-LPo	3_SP6_B06.ab1	Cysteine proteinase 3 Solanum lycopersicum (Tomato) (Lycopersicon esculentum)	3e-75	Q40143	vg11_olive_000285	Cysteine proteinase 3 Solanum lycopersicum (Tomato) (Lycopersicon esculentum)	OE6A053903T1	Cysteine proteinase 3	-	-	-	YES	YES	YES	YES
P2C4-LPo	4_SP6_B08.ab1	Nascent polypeptide-associated complex subunit beta Arabidopsis thaliana (Mouse-ear cress)	4e-61	Q9CAT7	vg11_olive_014157	-	OE6A076378T3	Transcription factor BTF3 homolog 4	-	-	-	-	YES	YES	-
P2C5-LPo	5_SP6_B10.ab1	3 of Clp protease adapter protein ClpF, chloroplastic Arabidopsis thaliana GN=CLPF	2e-28	Q67Y99-3	vg11_olive_024292	Uncharacterized protein Erythranthe guttata (Yellow monkey flower) (Mimulus guttatus)	OE6A097922T4	F-box only protein 21	-	-	-	-	-	-	-
P2C6-LPo	6_SP6_B12.ab1	-	-	-	vg11_olive_013412	Structural maintenance of chromosomes protein 1 Arabidopsis thaliana (Mouse-ear cress)	OE6A075336T1	Structural maintenance of chromosomes protein 1	-	-	-	YES	-	-	-
P2C7-LPo	7_SP6_B14.ab1	-	-	-	vg11_olive_003637	Probable galactinol--sucrose galactosyltransferase 5 Arabidopsis thaliana (Mouse-ear cress)	OE6A037993T2	Galactinol--sucrose galactosyltransferase	-	-	-	YES	-	YES	YES
P2C8-LPo	8_SP6_B16.ab1	-	-	-	vg11_olive_031412	-	OE6A086671T1	Asparagine--tRNA ligase, chloroplastic/mitochondrial	-	-	-	-	-	-	YES
P2C9-LPo	9_SP6_B18.ab1	-	-	-	vg11_olive_008286	-	-	-	-	-	-	-	-	-	-
P2C10-LPo	10_SP6_B20.ab1	Uncharacterized protein Anthurium amnicola.	3e-46	A0A1D1XGR3	vg11_olive_014727	Uncharacterized protein Erythranthe guttata (Yellow monkey flower) (Mimulus guttatus)	OE6A083997T4	Golgi apparatus membrane protein-like protein ECHIDNA	-	-	-	-	YES	YES	YES
P2C11-LPo	11_SP6_B22.ab1	-	-	-	-	-	-	-	-	-	-	-	-	-	-
P2C12-LPo	12_SP6_B24.ab1	-	-	-	-	-	-	-	-	-	-	-	-	-	-
P2C13-LPo	13_SP6_D02.ab1	Metallothionein-like protein type 3 Carica papaya (Papaya)	2e-24	Q96386	vg11_olive_011070	Metallothionein-like protein type 3 Carica papaya (Papaya)	OE6A111596T1	Metallothionein-like protein type 3	-	-	-	-	-	-	YES
P2C14-LPo	14_SP6_D04.ab1	Uncharacterized protein Coffea canephora (Robusta coffee)	2e-15	A0A068TP31	vg11_olive_037236	-	OE6A039786T1	FAD-linked sulfhydryl oxidase ERV1	-	-	-	-	-	YES	-
P2C15-LPo	15_SP6_D06.ab1	-	-	-	vg11_olive_006107	Cysteine proteinase RD21a Arabidopsis thaliana (Mouse-ear cress)	OE6A111535T1	Cysteine proteinase RD21a	-	-	-	YES	YES	YES	YES
P2C16-LPo	16_SP6_D08.ab1	Protein NRT1/ PTR FAMILY 2.11 Arabidopsis thaliana (Mouse-ear cress)	1e-63	Q9LV10	vg11_olive_038495	Protein NRT1/ PTR FAMILY 2.11 Arabidopsis thaliana (Mouse-ear cress)	OE6A113952T3	Protein NRT1/ PTR FAMILY 2.11	-	-	-	YES	YES	YES	-
P2C17-LPo	17_SP6_D10.ab1	-	-	-	-	-	-	-	-	-	-	-	-	-	-
P2C18-LPo	18_SP6_D12.ab1	-	-	-	vg11_olive_007678	-	OE6A016596T1	Isoprene synthase, chloroplastic	-	-	-	-	-	-	-
P2C19-LPo	19_SP6_D14.ab1	Expansin-A10 Arabidopsis thaliana (Mouse-ear cress)	3e-14	Q9LDR9	vg11_olive_023233	Expansin-A10 Arabidopsis thaliana (Mouse-ear cress)	OE6A048265T2	Catalase isozyme 3	-	-	-	-	-	-	-
P2C20-LPo	20_SP6_D16.ab1	Non-specific lipid-transfer protein Malus domestica (Apple) (Pyrus malus)	5e-26	Q9M5X7	vg11_olive_037542	Non-specific lipid-transfer protein Malus domestica (Apple) (Pyrus malus)	OE6A070100T1	Non-specific lipid-transfer protein	-	-	-	-	-	-	-
P2C21-LPo	21_SP6_D18.ab1	-	-	-	vg11_olive_001230	NAD(P)H-quinone oxidoreductase chain 4, chloroplastic Solanum lycopersicum (Tomato) (Lycopersicon esculentum) Plastid Chloroplast	-	-	-	-	-	-	-	-	-
P2C22-LPo	22_SP6_D20.ab1	-	-	-	-	-	-	-	-	-	-	-	-	-	-
P2C23-LPo	23_SP6_D22.ab1	Protein TIFY 10B Arabidopsis thaliana (Mouse-ear cress)	6e-05	Q9S7M2	vg11_olive_038533	2 of Protein TIFY 7 Arabidopsis thaliana GN=TIFY7	OE6A114520T6	Protein TIFY 6B	-	-	-	YES	-	-	-
P2C24-LPo	24_SP6_D24.ab1	Photosystem I reaction center subunit V, chloroplastic Spinacia oleracea (Spinach)	3e-43	P12357	vg11_olive_030655	Photosystem I reaction center subunit V, chloroplastic Spinacia oleracea (Spinach)	OE6A066733T1	Photosystem I reaction center subunit V, chloroplastic	-	-	-	-	-	-	YES
P2C25-LPo	25_SP6_F02.ab1	-	-	-	vg11_olive_008286	-	-	-	-	-	-	-	-	-	-
P2C26-LPo	26_SP6_F04.ab1	-	-	-	-	-	-	-	-	-	-	-	-	-	-
P2C27-LPo	27_SP6_F06.ab1	-	-	-	vg11_olive_009831	Ribulose bisphosphate carboxylase/oxygenase activase 1, chloroplastic Larrea tridentata (Creosote bush) (Zygophyllum tridentatum)	OE6A086744T5	Protein SHORT-ROOT	-	-	-	-	-	-	YES
P2C28-LPo	28_SP6_F08.ab1	Fructose-bisphosphate aldolase, cytoplasmic isozyme 1 Pisum sativum (Garden pea)	1e-92	P46256	vg11_olive_008131	Fructose-bisphosphate aldolase, cytoplasmic isozyme 1 Pisum sativum (Garden pea)	OE6A058150T1	Fructose-bisphosphate aldolase, cytoplasmic isozyme 1	-	-	-	-	-	-	YES
P2C29-LPo	29_SP6_F10.ab1	Probable serine/threonine-protein kinase At5g41260 Arabidopsis thaliana (Mouse-ear cress)	1e-69	Q9FHD7	vg11_olive_023082	Probable serine/threonine-protein kinase At5g41260 Arabidopsis thaliana (Mouse-ear cress)	OE6A075128T3	Probable serine/threonine-protein kinase At5g41260	-	-	-	-	-	-	-
P2C30-LPo	30_SP6_F12.ab1	-	-	-	vg11_olive_013127	Glucose-6-phosphate 1-dehydrogenase, chloroplastic Spinacia oleracea (Spinach)	OE6A069549T2	Glucose-6-phosphate 1-dehydrogenase, chloroplastic	-	-	-	-	YES	-	-
P2C31-LPo	31_SP6_F14.ab1	-	-	-	vg11_olive_000822	-	OE6A109129T1	Protein OPI10 homolog	-	-	-	-	-	-	-
P2C32-LPo	32_SP6_F16.ab1	4-diphosphocytidyl-2-C-methyl-D-erythritol kinase, chloroplastic Mentha piperita (Peppermint) (Mentha aquatica x Mentha spicata)	4e-49	P56848	vg11_olive_016703	4-diphosphocytidyl-2-C-methyl-D-erythritol kinase, chloroplastic Oryza sativa subsp. japonica (Rice)	OE6A022888T3	4-diphosphocytidyl-2-C-methyl-D-erythritol kinase, chloroplastic	-	-	-	-	-	-	-
P2C33-LPo	33_SP6_F18.ab1	Uncharacterized protein Daucus carota subsp. sativus.	1e-76	A0A162AKA3	vg11_olive_005935	-	OE6A076860T1	UPF0301 protein TC_0483	-	-	-	YES	YES	YES	YES
P2C34-LPo	34_SP6_F20.ab1	NADP-dependent glyceraldehyde-3-phosphate dehydrogenase Nicotiana plumbaginifolia (Leadwort-leaved tobacco) (Tex-Mex tobacco)	1e-87	P93338	vg11_olive_002405	NADP-dependent glyceraldehyde-3-phosphate dehydrogenase Arabidopsis thaliana (Mouse-ear cress)	OE6A027234T2	NADP-dependent glyceraldehyde-3-phosphate dehydrogenase	-	-	-	YES	YES	YES	YES
P2C35-LPo	35_SP6_F22.ab1	-	-	-	-	-	-	-	-	-	-	-	-	-	-
P2C36-LPo	36_SP6_F24.ab1	-	-	-	-	-	-	-	-	-	-	-	-	-	-
P2C37-LPo	37_SP6_H02.ab1	Ubiquitin Avena sativa (Oat)	4e-31	P69310	vg11_olive_037922_split_0	Ubiquitin Avena sativa (Oat)	OE6A023707T2	Polyubiquitin 4	-	-	-	-	-	-	-
P2C38-LPo	38_SP6_H04.ab1	-	-	-	vg11_olive_010835	Lysine-specific demethylase JMJ706 Oryza sativa subsp. japonica (Rice)	OE6A101217T1	Lysine-specific demethylase REF6	-	-	-	-	-	-	-
P2C39-LPo	39_SP6_H06.ab1	Chlorophyll a-b binding protein 8, chloroplastic Solanum lycopersicum (Tomato) (Lycopersicon esculentum)	2e-81	P27522	vg11_olive_002751	Chlorophyll a-b binding protein 8, chloroplastic Solanum lycopersicum (Tomato) (Lycopersicon esculentum)	OE6A080272T1	Chlorophyll a-b binding protein 8, chloroplastic	-	-	-	YES	YES	YES	YES
P2C40-LPo	40_SP6_H08.ab1	PsbP domain-containing protein 4, chloroplastic Arabidopsis thaliana (Mouse-ear cress)	2e-66	O49292	vg11_olive_030406	PsbP domain-containing protein 4, chloroplastic Arabidopsis thaliana (Mouse-ear cress)	OE6A019468T1	PsbP domain-containing protein 4, chloroplastic	-	-	-	-	YES	-	YES
P2C41-LPo	41_SP6_H10.ab1	-	-	-	vg11_olive_030565	-	OE6A002534T3	Metacaspase-1	-	-	-	-	-	-	-
P2C42-LPo	42_SP6_H12.ab1	-	-	-	-	-	-	-	-	-	-	-	-	-	-
P2C43-LPo	43_SP6_H14.ab1	Monoxygenase Olea europaea (Common olive)	2e-133	W8P1K5	vg11_olive_011293	Monoxygenase Olea europaea (Common olive)	OE6A058970T1	FAD-dependent urate hydroxylase	-	-	-	-	-	-	-
P2C44-LPo	44_SP6_H16.ab1	-	-	-	vg11_olive_004488	Uncharacterized protein Erythranthe guttata (Yellow monkey flower) (Mimulus guttatus)	OE6A057574T1	BTB/POZ domain-containing protein At1g63850	-	-	-	-	-	-	-
P2C45-LPo	45_SP6_H18.ab1	-	-	-	-	-	-	-	-	-	-	-	-	-	-
P2C46-LPo	46_SP6_H20.ab1	Uncharacterized protein Musa acuminata subsp. malaccensis (Wild banana) (Musa malaccensis)	3e-22	M0U2D1	vg11_olive_019238	Sec-independent protein translocase protein TATC, chloroplastic Oryza sativa subsp. japonica (Rice)	OE6A061550T1	Sec-independent protein translocase protein TATC, chloroplastic	-	-	-	-	-	YES	-
P2C47-LPo	47_SP6_H22.ab1	-	-	-	vg11_olive_019062	Metallothionein-like protein 3A Oryza sativa subsp. japonica (Rice)	OE6A022948T1	Cytochrome c oxidase copper chaperone 1	-	-	-	-	-	-	-
P2C48-LPo	48_SP6_H24.ab1	Aspartic proteinase Cucurbita pepo (Vegetable marrow) (Summer squash)	0.0001	O04057	vg11_olive_038880	Aspartic proteinase Cucurbita pepo (Vegetable marrow) (Summer squash)	OE6A003315T2	Protein ASPARTIC PROTEASE IN GUARD CELL 1	-	-	-	-	YES	-	-
P2C49-LPo	49_SP6_J02.ab1	2 of B-box zinc finger protein 19 Arabidopsis thaliana GN=BBX19	0.014	C0SVM5-2	vg11_olive_005850	2 of B-box zinc finger protein 19 Arabidopsis thaliana GN=BBX19	OE6A004217T4	Probable salt tolerance-like protein At1g78600	-	-	-	-	-	-	-
P2C50-LPo	50_SP6_J04.ab1	Non-specific lipid-transfer protein Malus domestica (Apple) (Pyrus malus)	2e-26	Q9M5X7	vg11_olive_037542	Non-specific lipid-transfer protein Malus domestica (Apple) (Pyrus malus)	OE6A070100T1	Non-specific lipid-transfer protein	-	-	-	-	YES	YES	YES
P2C51-LPo	51_SP6_J06.ab1	Protein DEHYDRATION-INDUCED 19 Arabidopsis thaliana (Mouse-ear cress)	0.7	Q39083	vg11_olive_036148	E3 ubiquitin protein ligase RIE1 Arabidopsis thaliana (Mouse-ear cress)	OE6A096302T1	E3 ubiquitin protein ligase RIE1	-	-	-	YES	-	-	-
P2C52-LPo	52_SP6_J08.ab1	Clp protease adapter protein ClpF, chloroplastic Arabidopsis thaliana (Mouse-ear cress)	6e-93	Q67Y99	vg11_olive_010144	-	OE6A097922T5	F-box only protein 21	-	-	-	-	-	YES	-
P2C53-LPo	53_SP6_J10.ab1	2 of Peroxisomal (S)-2-hydroxy-acid oxidase GLO5 Arabidopsis thaliana GN=GLO5	5e-106	O49506-2	vg11_olive_001157	Peroxisomal (S)-2-hydroxy-acid oxidase Spinacia oleracea (Spinach)	OE6A113573T1	Peroxisomal (S)-2-hydroxy-acid oxidase	-	-	-	YES	-	YES	YES
P2C54-LPo	54_SP6_J12.ab1	Probable aminotransferase Olea europaea (Common olive)	2e-67	A0A1C9ZM76	vg11_olive_001646	Probable aminotransferase TAT2 Arabidopsis thaliana (Mouse-ear cress)	OE6A028748T3	Probable aminotransferase TAT2	-	-	YES	-	-	-	-
P2C55-LPo	55_SP6_J14.ab1	Cytochrome c-type biogenesis ccda-like chloroplastic protein 1 Oryza sativa subsp. japonica (Rice)	4e-13	Q2RAR6	vg11_olive_014694	Cytochrome c-type biogenesis ccda-like chloroplastic protein 1 Oryza sativa subsp. japonica (Rice)	OE6A055033T1	Cytochrome c-type biogenesis ccda-like chloroplastic protein 1	-	-	-	YES	YES	YES	-
P2C56-LPo	56_SP6_J16.ab1	Glycerate dehydrogenase HPR, peroxisomal Arabidopsis thaliana (Mouse-ear cress)	2e-114	Q9C9W5	vg11_olive_005465	Glycerate dehydrogenase HPR, peroxisomal Arabidopsis thaliana (Mouse-ear cress)	OE6A048457T5	Glycerate dehydrogenase HPR, peroxisomal	-	-	-	YES	YES	-	YES
P2C57-LPo	57_SP6_J18.ab1	-	-	-	vg11_olive_022153	Multicopper oxidase LPR2 Arabidopsis thaliana (Mouse-ear cress)	OE6A034213T3	Multicopper oxidase LPR2	-	-	-	YES	YES	-	-
P2C58-LPo	58_SP6_J20.ab1	E3 ubiquitin-protein ligase SP1 Arabidopsis thaliana (Mouse-ear cress)	1e-18	Q8L7N4	vg11_olive_000203	-	OE6A039927T2	Cytochrome P450 CYP72A219	-	-	-	-	-	-	-
P2C59-LPo	59_SP6_J22.ab1	-	-	-	vg11_olive_005479	AT-rich interactive domain-containing protein 4 Arabidopsis thaliana (Mouse-ear cress)	OE6A084394T1	AT-rich interactive domain-containing protein 4	-	-	-	-	YES	-	-
P2C60-LPo	60_SP6_J24.ab1	-	-	-	vg11_olive_012309	Elongation factor TuA, chloroplastic Nicotiana sylvestris (Wood tobacco) (South American tobacco)	OE6A096048T1	Elongation factor TuB, chloroplastic	-	-	-	YES	YES	-	YES
P2C61-LPo	61_SP6_L02.ab1	Photosystem II 10 kDa polypeptide, chloroplastic Solanum tuberosum (Potato)	5e-45	P06183	vg11_olive_036300	Photosystem II 10 kDa polypeptide, chloroplastic Nicotiana tabacum (Common tobacco)	OE6A077342T1	Photosystem II 10 kDa polypeptide, chloroplastic	-	-	-	YES	YES	YES	YES
P2C62-LPo	62_SP6_L04.ab1	Cyclin-dependent kinase E-1 Arabidopsis thaliana (Mouse-ear cress)	4e-86	Q84TI6	vg11_olive_007388	Cyclin-dependent kinase E-1 Arabidopsis thaliana (Mouse-ear cress)	OE6A109554T3	Cyclin-dependent kinase E-1	-	-	-	-	-	-	-
P2C63-LPo	63_SP6_L06.ab1	-	-	-	-	-	-	-	-	-	-	-	-	-	-
P2C64-LPo	64_SP6_L08.ab1	UDP-glycosyltransferase 91A1 Arabidopsis thaliana (Mouse-ear cress)	4e-53	Q940V3	vg11_olive_025683	UDP-glycosyltransferase 91A1 Arabidopsis thaliana (Mouse-ear cress)	OE6A058498T1	UDP-glycosyltransferase 91A1	-	-	-	-	-	-	-
P2C65-LPo	65_SP6_L10.ab1	Putative uncharacterized protein Vitis vinifera (Grape)	4e-92	D7U207	vg11_olive_005519	-	OE6A103925T3	Chaperone protein DnaJ	-	-	-	-	-	-	-
P2C66-LPo	66_SP6_L12.ab1	Uncharacterized protein Coffea canephora (Robusta coffee)	1e-44	A0A068UX35	vg11_olive_019266	Coffea canephora DH200=94 genomic scaffold, scaffold_73 Coffea canephora (Robusta coffee)	OE6A001326T1	BTB/POZ domain-containing protein At1g21780	-	-	-	-	-	-	-
P2C67-LPo	67_SP6_L14.ab1	-	-	-	-	-	-	-	-	-	-	-	-	-	-
P2C68-LPo	68_SP6_L16.ab1	Magnesium-protoporphyrin IX monomethyl ester [oxidative] cyclase, chloroplastic Euphorbia esula (Leafy spurge)	1e-131	Q945B7	vg11_olive_001523	Magnesium-protoporphyrin IX monomethyl ester [oxidative] cyclase, chloroplastic Gossypium hirsutum (Upland cotton) (Gossypium mexicanum)	OE6A118807T1	Magnesium-protoporphyrin IX monomethyl ester [oxidative] cyclase, chloroplastic	-	-	-	YES	YES	YES	YES
P2C69-LPo	69_SP6_L18.ab1	NADP-dependent malic enzyme Populus trichocarpa (Western balsam poplar) (Populus balsamifera subsp. trichocarpa)	4e-86	P34105	vg11_olive_000297	NADP-dependent malic enzyme Vitis vinifera (Grape)	OE6A108943T1	NADP-dependent malic enzyme	-	-	-	YES	YES	YES	YES
P2C70-LPo	70_SP6_L20.ab1	-	-	-	-	-	-	-	-	-	-	-	-	-	-
P2C71-LPo	71_SP6_L22.ab1	Geraniol synthase, chloroplastic Ocimum basilicum (Sweet basil)	8e-92	Q6USK1	vg11_olive_035158	Geraniol synthase, chloroplastic Ocimum basilicum (Sweet basil)	OE6A119166T3	Geraniol synthase, chloroplastic	-	-	-	-	YES	-	YES
P2C72-LPo	72_SP6_L24.ab1	Ferredoxin--NADP reductase, chloroplastic Vicia faba (Broad bean) (Faba vulgaris)	4e-76	P41346	vg11_olive_007767	Ferredoxin--NADP reductase, leaf isozyme 1, chloroplastic Arabidopsis thaliana (Mouse-ear cress)	OE6A045728T1	Ferredoxin--NADP reductase, leaf-type isozyme, chloroplastic	YES	-	-	YES	YES	YES	YES
P2C73-LPo	73_SP6_N02.ab1	Oxygen-evolving enhancer protein 2-1, chloroplastic Nicotiana tabacum (Common tobacco)	1e-88	Q7DM39	vg11_olive_009547	Oxygen-evolving enhancer protein 2, chloroplastic Pisum sativum (Garden pea)	OE6A005088T1	DEAD-box ATP-dependent RNA helicase 53	-	-	-	-	-	-	YES
P2C74-LPo	74_SP6_N04.ab1	NAD(P)H-quinone oxidoreductase subunit J, chloroplastic Jasminum nudiflorum (Winter jasmine) Plastid Chloroplast	2e-88	Q06RC6	vg11_olive_011358	NAD(P)H-quinone oxidoreductase subunit J, chloroplastic Jasminum nudiflorum (Winter jasmine) Plastid Chloroplast	OE6A088738T1	NAD(P)H-quinone oxidoreductase subunit J, chloroplastic	-	-	-	-	-	-	-
P2C75-LPo	75_SP6_N06.ab1	-	-	-	-	-	-	-	-	-	-	-	-	-	-
P2C76-LPo	76_SP6_N08.ab1	Probable GTP diphosphokinase CRSH, chloroplastic Arabidopsis thaliana (Mouse-ear cress)	4e-78	Q84R11	vg11_olive_004991	Probable GTP diphosphokinase CRSH, chloroplastic Arabidopsis thaliana (Mouse-ear cress)	OE6A069184T1	Rop guanine nucleotide exchange factor 14	-	YES	-	-	-	-	-
P2C77-LPo	77_SP6_N10.ab1	-	-	-	vg11_olive_006639	Uncharacterized protein Lotus japonicus (Lotus corniculatus var. japonicus)	OE6A119710T2	Two-component response regulator ARR7	-	-	-	YES	YES	YES	YES
P2C78-LPo	78_SP6_N12.ab1	Putative polyol transporter 2 Arabidopsis thaliana (Mouse-ear cress)	2e-45	Q9XIH6	vg11_olive_026971	Polyol transporter 5 Arabidopsis thaliana (Mouse-ear cress)	OE6A102094T2	Polyol transporter 5	-	-	-	YES	-	-	-
P2C79-LPo	79_SP6_N14.ab1	Protease Do-like 1, chloroplastic Arabidopsis thaliana (Mouse-ear cress)	2e-86	O22609	vg11_olive_000747	Protease Do-like 1, chloroplastic Arabidopsis thaliana (Mouse-ear cress)	OE6A079174T1	Protease Do-like 1, chloroplastic	-	-	-	YES	YES	YES	YES
P2C80-LPo	80_SP6_N16.ab1	Plastocyanin, chloroplastic Solanum lycopersicum (Tomato) (Lycopersicon esculentum)	5e-25	P17340	vg11_olive_029237	Plastocyanin, chloroplastic Solanum lycopersicum (Tomato) (Lycopersicon esculentum)	OE6A024826T1	Plastocyanin, chloroplastic	-	-	-	-	-	YES	YES
P2C81-LPo	81_SP6_N18.ab1	-	-	-	-	-	-	-	-	-	-	-	-	-	-
P2C82-LPo	82_SP6_N20.ab1	-	-	-	-	-	-	-	-	-	-	-	-	-	-
P2C83-LPo	83_SP6_N22.ab1	Auxin-responsive protein IAA27 Arabidopsis thaliana (Mouse-ear cress)	2e-50	Q9ZSY8	vg11_olive_004917	Auxin-responsive protein IAA8 Arabidopsis thaliana (Mouse-ear cress)	OE6A004451T3	Auxin-responsive protein IAA27	-	-	-	-	-	-	-
P2C84-LPo	84_SP6_N24.ab1	Putative uncharacterized protein Vitis vinifera (Grape)	1e-14	A5CA74	vg11_olive_018604	Putative uncharacterized protein Vitis vinifera (Grape)	OE6A087747T5	Protein PHR1-LIKE 1	-	-	-	-	-	-	-
P2C85-LPo	85_SP6_P02.ab1	Ribulose bisphosphate carboxylase/oxygenase activase 2, chloroplastic Larrea tridentata (Creosote bush) (Zygophyllum tridentatum)	9e-35	Q7X999	vg11_olive_010655_split_0	Ribulose bisphosphate carboxylase/oxygenase activase 2, chloroplastic Larrea tridentata (Creosote bush) (Zygophyllum tridentatum)	OE6A110201T1	Ribulose bisphosphate carboxylase/oxygenase activase 1, chloroplastic	-	-	-	YES	YES	YES	YES
P2C86-LPo	86_SP6_P04.ab1	-	-	-	vg11_olive_005858	Monoxygenase Olea europaea (Common olive)	OE6A112399T2	3-hydroxybenzoate 6-hydroxylase	-	-	-	-	-	-	-
P2C87-LPo	87_SP6_P06.ab1	-	-	-	vg11_olive_034860	-	OE6A031874T2	F-box/kelch-repeat protein At5g43190	-	-	-	-	YES	-	-
P2C88-LPo	88_SP6_P08.ab1	Chlorophyll a-b binding protein CP29.1, chloroplastic Arabidopsis thaliana (Mouse-ear cress)	4e-120	Q07473	vg11_olive_003055	Chlorophyll a-b binding protein CP29.2, chloroplastic Arabidopsis thaliana (Mouse-ear cress)	OE6A060174T1	Chlorophyll a-b binding protein CP29.1, chloroplastic	-	-	-	-	YES	YES	YES
P2C89-LPo	89_SP6_P10.ab1	-	-	-	-	-	-	-	-	-	-	-	-	-	-
P2C90-LPo	90_SP6_P12.ab1	Peptide methionine sulfoxide reductase Lactuca sativa (Garden lettuce)	1e-56	Q9SEC2	vg11_olive_023393	Peptide methionine sulfoxide reductase Lactuca sativa (Garden lettuce)	OE6A035753T1	Peptide methionine sulfoxide reductase	-	-	-	YES	YES	-	-
P2C91-LPo	91_SP6_P14.ab1	-	-	-	vg11_olive_038299	-	OE6A098060T3	Bark storage protein A	-	-	-	YES	YES	YES	YES
P2C92-LPo	92_SP6_P16.ab1	-	-	-	-	-	-	-	-	-	-	-	-	-	-
P2C93-LPo	93_SP6_P18.ab1	-	-	-	-	-	-	-	-	-	-	-	-	-	-
P2C94-LPo	94_SP6_P20.ab1	-	-	-	vg11_olive_030560	Peptidyl-prolyl cis-trans isomerase FKBP16-4, chloroplastic Arabidopsis thaliana (Mouse-ear cress)	OE6A061861T1	Peptidyl-prolyl cis-trans isomerase FKBP16-4, chloroplastic	-	-	-	-	YES	-	-
P2C95-LPo	95_SP6_P22.ab1	Glyceraldehyde-3-phosphate dehydrogenase GAPA2, chloroplastic Arabidopsis thaliana (Mouse-ear cress)	6e-78	Q9LPW0	vg11_olive_002805	Glyceraldehyde-3-phosphate dehydrogenase GAPA1, chloroplastic Arabidopsis thaliana (Mouse-ear cress)	OE6A004414T2	Glyceraldehyde-3-phosphate dehydrogenase A, chloroplastic	-	-	-	YES	YES	YES	YES
P2C96-LPo	96_SP6_P24.ab1	-	-	-	vg11_olive_001670	DEAD-box ATP-dependent RNA helicase 17 Arabidopsis thaliana (Mouse-ear cress)	OE6A095572T8	DEAD-box ATP-dependent RNA helicase 17	-	-	YES	YES	-	YES	-
