# Supplementary material for: Identification and Functional Annotation of Genes Differentially Expressed in the Reproductive Tissues of the Olive Tree (Olea europaea L.) through the Generation of Subtractive Libraries
Source: Front Plant Sci. 2017 Sep 13;8:1576. doi: 10.3389/fpls.2017.01576 (PMC5601413; doi:10.3389/fpls.2017.01576)
Supplement: Supplementary file 13 [file Table13.XLSX]

## Sheet: T_Leaf__D_Pistil_table_complete
L(P)		FULL-LengtherNext ANNOTATION			REPROLIVE		CRUZ		BLAST WITH Roche/454 READS
Sample	Fastq_id	Description	e-value	Subject_id	leaf_transc_id	leaf_description	cruz_transc_id	cruz_description	pollen_mature	pollen_germ_1h	pollen_germ_5h30min	pistil_stage2	pistil_stage3	pistil_stage4	leaf			Rejected by SeqTrimNext
P1C1-LP	1_SP6_B01.ab1	Metallothionein-like protein type 3 Carica papaya (Papaya)	3e-24	Q96386	vg11_olive_011070	Metallothionein-like protein type 3 Carica papaya (Papaya)	OE6A111596T1	Metallothionein-like protein type 3	-	-	-	-	-	-	YES
P1C2-LP	2_SP6_B03.ab1	-	-	-	vg11_olive_013819	Uncharacterized protein Erythranthe guttata (Yellow monkey flower) (Mimulus guttatus)	OE6A080691T1	Protein LOW PSII ACCUMULATION 1, chloroplastic	-	-	-	-	-	-	-
P1C3-LP	3_SP6_B05.ab1	Bax inhibitor 1 Arabidopsis thaliana (Mouse-ear cress)	3e-45	Q9LD45	vg11_olive_027299	Bax inhibitor 1 Arabidopsis thaliana (Mouse-ear cress)	OE6A002891T2	Bax inhibitor 1	-	-	-	-	YES	-	-
P1C4-LP	4_SP6_B07.ab1	-	-	-	-	-	-	-	-	-	-	-	-	-	-
P1C5-LP	5_SP6_B09.ab1	-	-	-	-	-	-	-	-	-	-	-	-	-	-
P1C6-LP	6_SP6_B11.ab1	-	-	-	-	-	-	-	-	-	-	-	-	-	-
P1C7-LP	7_SP6_B13.ab1	-	-	-	-	-	-	-	-	-	-	-	-	-	-
P1C8-LP	8_SP6_B15.ab1	-	-	-	-	-	-	-	-	-	-	-	-	-	-
P1C9-LP	9_SP6_B17.ab1	-	-	-	vg11_olive_032082	Ribulose bisphosphate carboxylase small chain, chloroplastic Gossypium hirsutum (Upland cotton) (Gossypium mexicanum)	OE6A082796T1	Ribulose bisphosphate carboxylase small chain, chloroplastic	-	-	-	YES	YES	YES	YES
P1C10-LP	10_SP6_B19.ab1	-	-	-	-	-	-	-	-	-	-	-	-	-	-
P1C11-LP	11_SP6_B21.ab1	-	-	-	vg11_olive_000878	Cell division control protein 48 homolog A Arabidopsis thaliana (Mouse-ear cress)	OE6A061216T2	Cell division cycle protein 48 homolog	YES	-	-	YES	YES	YES	-
P1C12-LP	12_SP6_B23.ab1	-	-	-	-	-	-	-	-	-	-	-	-	-	-
P1C13-LP	13_SP6_D01.ab1	-	-	-	-	-	-	-	-	-	-	-	-	-	-
P1C14-LP	14_SP6_D03.ab1	Late embryogenesis abundant protein D-11 Gossypium hirsutum (Upland cotton) (Gossypium mexicanum)	0.002	P09442	vg11_olive_013802	-	OE6A027104T1	Probable disease resistance protein At1g12280	-	-	-	YES	YES	YES	YES
P1C15-LP	15_SP6_D05.ab1	-	-	-	vg11_olive_007647	Chlorophyll a-b binding protein 21, chloroplastic Nicotiana tabacum (Common tobacco)	OE6A081417T1	Chlorophyll a-b binding protein 21, chloroplastic	-	-	-	-	YES	YES	YES
P1C16-LP	16_SP6_D07.ab1	2 of High mobility group B protein 3 Arabidopsis thaliana GN=HMGB3	5e-42	P93047-2	vg11_olive_024266	2 of High mobility group B protein 3 Arabidopsis thaliana GN=HMGB3	OE6A103574T3	High mobility group B protein 3	-	-	-	-	-	-	-
P1C17-LP	17_SP6_D09.ab1	-	-	-	vg11_olive_007647	Chlorophyll a-b binding protein 21, chloroplastic Nicotiana tabacum (Common tobacco)	OE6A081417T1	Chlorophyll a-b binding protein 21, chloroplastic	-	-	-	-	-	-	-
P1C18-LP	18_SP6_D11.ab1	Plastocyanin, chloroplastic Solanum lycopersicum (Tomato) (Lycopersicon esculentum)	3e-50	P17340	vg11_olive_011873	Plastocyanin, chloroplastic Solanum lycopersicum (Tomato) (Lycopersicon esculentum)	OE6A115438T1	Plastocyanin, chloroplastic	-	YES	-	YES	YES	YES	YES
P1C19-LP	19_SP6_D13.ab1	-	-	-	-	-	-	-	-	-	-	-	-	-	-
P1C20-LP	20_SP6_D15.ab1	-	-	-	-	-	-	-	-	-	-	-	-	-	-
P1C21-LP	21_SP6_D17.ab1	-	-	-	-	-	-	-	-	-	-	-	-	-	-
P1C22-LP	22_SP6_D19.ab1	-	-	-	-	-	-	-	-	-	-	-	-	-	-
P1C23-LP	23_SP6_D21.ab1	-	-	-	-	-	-	-	-	-	-	-	-	-	-
P1C24-LP	24_SP6_D23.ab1	-	-	-	-	-	-	-	-	-	-	-	-	-	-
P1C25-LP	25_SP6_F01.ab1	-	-	-	-	-	-	-	-	-	-	-	-	-	-
P1C26-LP	26_SP6_F03.ab1	-	-	-	vg11_olive_031323	Cysteine proteinase RD21a Arabidopsis thaliana (Mouse-ear cress)	OE6A111535T1	Cysteine proteinase RD21a	-	-	-	YES	YES	YES	YES
P1C27-LP	27_SP6_F05.ab1	Non-specific lipid-transfer protein Malus domestica (Apple) (Pyrus malus)	2e-26	Q9M5X7	vg11_olive_037542	Non-specific lipid-transfer protein Malus domestica (Apple) (Pyrus malus)	OE6A070100T1	Non-specific lipid-transfer protein	-	-	-	-	YES	YES	YES
P1C28-LP	28_SP6_F07.ab1	Putative uncharacterized protein Vitis vinifera (Grape)	3e-32	F6HED6	vg11_olive_018809	Putative uncharacterized protein Vitis vinifera (Grape)	OE6A077257T3	GTP-binding protein YPTM2	-	-	-	-	-	-	-
P1C29-LP	29_SP6_F09.ab1	-	-	-	-	-	-	-	-	-	-	-	-	-	-
P1C30-LP	30_SP6_F11.ab1	Non-specific lipid-transfer protein Malus domestica (Apple) (Pyrus malus)	2e-25	Q9M5X7	vg11_olive_037542	Non-specific lipid-transfer protein Malus domestica (Apple) (Pyrus malus)	OE6A070100T1	Non-specific lipid-transfer protein	-	-	-	-	YES	YES	YES
P1C31-LP	31_SP6_F13.ab1	-	-	-	-	-	-	-	-	-	-	-	-	-	-
P1C32-LP	32_SP6_F15.ab1	-	-	-	vg11_olive_002096	Acetyl-coenzyme A carboxylase carboxyl transferase subunit beta, chloroplastic Carica papaya (Papaya) Plastid Chloroplast	OE6A009031T3	Transcription factor bHLH47	-	-	-	-	-	-	-
P1C33-LP	33_SP6_F17.ab1	-	-	-	-	-	-	-	-	-	-	-	-	-	-
P1C34-LP	34_SP6_F19.ab1	Putative DNA damage-binding protein 1-like Solanum chacoense (Chaco potato)	7e-75	A0A0V0IXE1	vg11_olive_006656	DNA damage-binding protein 1 Solanum lycopersicum (Tomato) (Lycopersicon esculentum)	OE6A032916T4	DNA damage-binding protein 1	-	-	-	-	-	-	-
P1C35-LP	35_SP6_F21.ab1	Fructose-bisphosphate aldolase 1, chloroplastic Arabidopsis thaliana (Mouse-ear cress)	1e-46	Q9SJU4	vg11_olive_001923	Probable fructose-bisphosphate aldolase 1, chloroplastic Arabidopsis thaliana (Mouse-ear cress)	OE6A061765T1	Probable fructose-bisphosphate aldolase 2, chloroplastic	-	-	-	-	-	-	-
P1C36-LP	36_SP6_F23.ab1	Glutamine synthetase cytosolic isozyme 1 Vitis vinifera (Grape)	2e-75	P51118	vg11_olive_001295	Glutamine synthetase cytosolic isozyme 2 Vitis vinifera (Grape)	OE6A048840T3	Glutamine synthetase nodule isozyme	YES	YES	-	YES	YES	YES	YES
P1C37-LP	37_SP6_H01.ab1	-	-	-	-	-	-	-	-	-	-	-	-	-	-
P1C38-LP	38_SP6_H03.ab1	-	-	-	-	-	-	-	-	-	-	-	-	-	-
P1C39-LP	39_SP6_H05.ab1	-	-	-	-	-	-	-	-	-	-	-	-	-	-
P1C40-LP	40_SP6_H07.ab1	-	-	-	-	-	-	-	-	-	-	-	-	-	-
P1C41-LP	41_SP6_H09.ab1	-	-	-	-	-	-	-	-	-	-	-	-	-	-
P1C42-LP	42_SP6_H11.ab1	Glutamine synthetase root isozyme 3 Zea mays (Maize)	4e-70	P38561	vg11_olive_001295	Glutamine synthetase cytosolic isozyme 2 Vitis vinifera (Grape)	OE6A048840T2	Glutamine synthetase cytosolic isozyme 1-1	-	-	-	YES	YES	YES	YES
P1C43-LP	43_SP6_H13.ab1	-	-	-	-	-	-	-	-	-	-	-	-	-	-
P1C44-LP	44_SP6_H15.ab1	-	-	-	-	-	-	-	-	-	-	-	-	-	-
P1C45-LP	45_SP6_H17.ab1	-	-	-	-	-	-	-	-	-	-	-	-	-	-
P1C46-LP	46_SP6_H19.ab1	Galactinol synthase 4 Arabidopsis thaliana (Mouse-ear cress)	3e-51	O22693	vg11_olive_013234	Galactinol synthase 1 Ajuga reptans (Bugle)	OE6A001640T2	Galactinol synthase 1	-	-	-	-	-	-	YES
P1C47-LP	47_SP6_H21.ab1	Uncharacterized protein Solanum tuberosum (Potato)	1e-102	M1AF95	vg11_olive_023735	40S ribosomal protein S5-2 Arabidopsis thaliana (Mouse-ear cress)	OE6A021385T2	40S ribosomal protein S5	-	-	YES	YES	YES	YES	-
P1C48-LP	48_SP6_H23.ab1	Uncharacterized protein Coffea canephora (Robusta coffee)	6e-111	A0A068VBP9	vg11_olive_021850	Protein disulfide isomerase-like 2-2 Oryza sativa subsp. japonica (Rice)	OE6A097641T2	Probable protein disulfide-isomerase A6	YES	YES	YES	YES	YES	YES	YES
P1C49-LP	49_SP6_J01.ab1	-	-	-	-	-	-	-	-	-	-	-	-	-	-
P1C50-LP	50_SP6_J03.ab1	-	-	-	-	-	-	-	-	-	-	-	-	-	-
P1C51-LP	51_SP6_J05.ab1	-	-	-	vg11_olive_021958	Protein NLP3 Oryza sativa subsp. japonica (Rice)	OE6A047646T4	Protein NLP7	-	-	-	-	-	-	-
P1C52-LP	52_SP6_J07.ab1	-	-	-	vg11_olive_000822	-	OE6A109129T1	Protein OPI10 homolog	-	-	-	-	-	-	-
P1C53-LP	53_SP6_J09.ab1	-	-	-	vg11_olive_009403	Uncharacterized protein Solanum lycopersicum (Tomato) (Lycopersicon esculentum)	OE6A014960T2	NADH--cytochrome b5 reductase 1	YES	-	-	-	-	YES	-
P1C54-LP	54_SP6_J11.ab1	Glutamine synthetase root isozyme 3 Zea mays (Maize)	4e-70	P38561	vg11_olive_001295	Glutamine synthetase cytosolic isozyme 2 Vitis vinifera (Grape)	OE6A048840T2	Glutamine synthetase cytosolic isozyme 1-1	-	-	-	YES	YES	YES	YES
P1C55-LP	55_SP6_J13.ab1	Fructose-bisphosphate aldolase, chloroplastic Oryza sativa subsp. japonica (Rice)	1e-128	Q40677	vg11_olive_000647	Probable fructose-bisphosphate aldolase 2, chloroplastic Arabidopsis thaliana (Mouse-ear cress)	OE6A031770T2	Probable fructose-bisphosphate aldolase 2, chloroplastic	-	-	-	YES	-	YES	YES
P1C56-LP	56_SP6_J15.ab1	Ribulose bisphosphate carboxylase small chain 2, chloroplastic Spinacia oleracea (Spinach)	2e-20	Q43832	vg11_olive_007416	Ribulose bisphosphate carboxylase small chain 2, chloroplastic Spinacia oleracea (Spinach)	OE6A082796T1	Ribulose bisphosphate carboxylase small chain, chloroplastic	-	-	-	-	-	-	-
P1C57-LP	57_SP6_J17.ab1	-	-	-	-	-	-	-	-	-	-	-	-	-	-
P1C58-LP	58_SP6_J19.ab1	Fructose-bisphosphate aldolase Coffea canephora (Robusta coffee)	3e-54	A0A068TL79	vg11_olive_000647	Probable fructose-bisphosphate aldolase 2, chloroplastic Arabidopsis thaliana (Mouse-ear cress)	OE6A031770T2	Probable fructose-bisphosphate aldolase 2, chloroplastic	-	-	-	YES	YES	YES	YES
P1C59-LP	59_SP6_J21.ab1	-	-	-	-	-	-	-	-	-	-	-	-	-	-
P1C60-LP	60_SP6_J23.ab1	-	-	-	-	-	-	-	-	-	-	-	-	-	-
P1C61-LP	61_SP6_L01.ab1	Ribulose bisphosphate carboxylase small chain 2, chloroplastic Spinacia oleracea (Spinach)	1e-17	Q43832	vg11_olive_007416	Ribulose bisphosphate carboxylase small chain 2, chloroplastic Spinacia oleracea (Spinach)	OE6A082796T1	Ribulose bisphosphate carboxylase small chain, chloroplastic	-	-	-	-	-	-	-
P1C62-LP	62_SP6_L03.ab1	-	-	-	-	-	-	-	-	-	-	-	-	-	-
P1C63-LP	63_SP6_L05.ab1	Chlorophyll a-b binding protein 151, chloroplastic Gossypium hirsutum (Upland cotton) (Gossypium mexicanum)	2e-131	P27518	vg11_olive_003497	Chlorophyll a-b binding protein 37, chloroplastic Petunia sp. (Petunia)	OE6A106143T1	Chlorophyll a-b binding protein 37, chloroplastic	-	-	-	YES	YES	YES	YES
P1C64-LP	64_SP6_L07.ab1	Chlorophyll a-b binding protein 21, chloroplastic Nicotiana tabacum (Common tobacco)	5e-105	P27493	vg11_olive_005897	Chlorophyll a-b binding protein 21, chloroplastic Nicotiana tabacum (Common tobacco)	OE6A081417T1	Chlorophyll a-b binding protein 21, chloroplastic	-	-	-	YES	YES	YES	YES
P1C65-LP	65_SP6_L09.ab1	Metallothionein-like protein type 3 Carica papaya (Papaya)	3e-24	Q96386	vg11_olive_011070	Metallothionein-like protein type 3 Carica papaya (Papaya)	OE6A111596T1	Metallothionein-like protein type 3	-	-	-	-	-	-	YES
P1C66-LP	66_SP6_L11.ab1	-	-	-	vg11_olive_003649	-	OE6A062710T1	Ankyrin repeat protein SKIP35	-	-	-	YES	-	-	YES
P1C67-LP	67_SP6_L13.ab1	-	-	-	-	-	-	-	-	-	-	-	-	-	-
P1C68-LP	68_SP6_L15.ab1	Metallothionein-like protein type 3 Carica papaya (Papaya)	3e-24	Q96386	vg11_olive_011070	Metallothionein-like protein type 3 Carica papaya (Papaya)	OE6A111596T1	Metallothionein-like protein type 3	-	-	-	-	-	-	YES
P1C69-LP	69_SP6_L17.ab1	Fructose-bisphosphate aldolase, chloroplastic Oryza sativa subsp. japonica (Rice)	5e-120	Q40677	vg11_olive_000647	Probable fructose-bisphosphate aldolase 2, chloroplastic Arabidopsis thaliana (Mouse-ear cress)	OE6A031770T2	Probable fructose-bisphosphate aldolase 2, chloroplastic	-	-	-	YES	-	YES	YES
P1C70-LP	70_SP6_L19.ab1	-	-	-	-	-	-	-	-	-	-	-	-	-	-
P1C71-LP	71_SP6_L21.ab1	-	-	-	-	-	-	-	-	-	-	-	-	-	-
P1C72-LP	72_SP6_L23.ab1	-	-	-	-	-	-	-	-	-	-	-	-	-	-
P1C73-LP	73_SP6_N01.ab1	-	-	-	-	-	-	-	-	-	-	-	-	-	-
P1C74-LP	74_SP6_N03.ab1	Heavy metal-associated isoprenylated plant protein 26 Arabidopsis thaliana (Mouse-ear cress)	5e-60	Q9SZN7	vg11_olive_025703	Heavy metal-associated isoprenylated plant protein 26 Arabidopsis thaliana (Mouse-ear cress)	OE6A027835T1	Heavy metal-associated isoprenylated plant protein 26	-	-	-	-	-	-	-
P1C75-LP	75_SP6_N05.ab1	-	-	-	vg11_olive_007647	Chlorophyll a-b binding protein 21, chloroplastic Nicotiana tabacum (Common tobacco)	OE6A081417T1	Chlorophyll a-b binding protein 21, chloroplastic	-	-	-	-	YES	YES	YES
P1C76-LP	76_SP6_N07.ab1	Chlorophyll a-b binding protein 21, chloroplastic Nicotiana tabacum (Common tobacco)	2e-137	P27493	vg11_olive_005897	Chlorophyll a-b binding protein 21, chloroplastic Nicotiana tabacum (Common tobacco)	OE6A081417T1	Chlorophyll a-b binding protein 21, chloroplastic	-	-	-	YES	YES	YES	YES
P1C77-LP	77_SP6_N09.ab1	Chlorophyll a-b binding protein 151, chloroplastic Gossypium hirsutum (Upland cotton) (Gossypium mexicanum)	3e-131	P27518	vg11_olive_003497	Chlorophyll a-b binding protein 37, chloroplastic Petunia sp. (Petunia)	OE6A106143T1	Chlorophyll a-b binding protein 37, chloroplastic	-	-	-	YES	YES	YES	YES
P1C78-LP	78_SP6_N11.ab1	-	-	-	vg11_olive_007647	Chlorophyll a-b binding protein 21, chloroplastic Nicotiana tabacum (Common tobacco)	OE6A081417T1	Chlorophyll a-b binding protein 21, chloroplastic	-	-	-	-	-	-	YES
P1C79-LP	79_SP6_N13.ab1	Photosystem II 10 kDa polypeptide, chloroplastic Nicotiana tabacum (Common tobacco)	6e-64	Q40519	vg11_olive_027791	Photosystem II 10 kDa polypeptide, chloroplastic Nicotiana tabacum (Common tobacco)	OE6A077342T1	Photosystem II 10 kDa polypeptide, chloroplastic	-	-	-	YES	YES	YES	YES
P1C80-LP	80_SP6_N15.ab1	-	-	-	-	-	-	-	-	-	-	-	-	-	-
P1C81-LP	81_SP6_N17.ab1	-	-	-	-	-	-	-	-	-	-	-	-	-	-
P1C82-LP	82_SP6_N19.ab1	Metallothionein-like protein type 3 Musa acuminata (Banana) (Musa cavendishii)	6e-23	Q40256	vg11_olive_011070	Metallothionein-like protein type 3 Carica papaya (Papaya)	OE6A022948T1	Cytochrome c oxidase copper chaperone 1	-	-	-	-	-	-	YES
P1C83-LP	83_SP6_N21.ab1	-	-	-	vg11_olive_032481	Uncharacterized protein Solanum lycopersicum (Tomato) (Lycopersicon esculentum)	OE6A039601T1	COP9 signalosome complex subunit 1	-	-	-	-	-	-	-
P1C84-LP	84_SP6_N23.ab1	-	-	-	-	-	-	-	-	-	-	-	-	-	-
P1C85-LP	85_SP6_P01.ab1	Chlorophyll a-b binding protein 21, chloroplastic Nicotiana tabacum (Common tobacco)	8e-108	P27493	vg11_olive_001331	Chlorophyll a-b binding protein 21, chloroplastic Nicotiana tabacum (Common tobacco)	OE6A081417T1	Chlorophyll a-b binding protein 21, chloroplastic	-	-	-	YES	YES	YES	YES
P1C86-LP	86_SP6_P03.ab1	-	-	-	-	-	-	-	-	-	-	-	-	-	-
P1C87-LP	87_SP6_P05.ab1	Fructose-bisphosphate aldolase Coffea canephora (Robusta coffee)	3e-54	A0A068TL79	vg11_olive_010981	Fructose-bisphosphate aldolase, chloroplastic Spinacia oleracea (Spinach)	OE6A061765T1	Probable fructose-bisphosphate aldolase 2, chloroplastic	-	-	-	YES	YES	YES	YES
P1C88-LP	88_SP6_P07.ab1	-	-	-	-	-	-	-	-	-	-	-	-	-	-
P1C89-LP	89_SP6_P09.ab1	-	-	-	vg11_olive_001923	Probable fructose-bisphosphate aldolase 1, chloroplastic Arabidopsis thaliana (Mouse-ear cress)	OE6A061765T1	Probable fructose-bisphosphate aldolase 2, chloroplastic	-	-	-	-	-	-	-
P1C90-LP	90_SP6_P11.ab1	Glutamine synthetase root isozyme 3 Zea mays (Maize)	1e-69	P38561	vg11_olive_001295	Glutamine synthetase cytosolic isozyme 2 Vitis vinifera (Grape)	OE6A048840T2	Glutamine synthetase cytosolic isozyme 1-1	-	-	-	YES	YES	YES	YES
P1C91-LP	91_SP6_P13.ab1	-	-	-	-	-	-	-	-	-	-	-	-	-	-
P1C92-LP	92_SP6_P15.ab1	-	-	-	-	-	-	-	-	-	-	-	-	-	-
P1C93-LP	93_SP6_P17.ab1	-	-	-	-	-	-	-	-	-	-	-	-	-	-
P1C94-LP	94_SP6_P19.ab1	-	-	-	-	-	-	-	-	-	-	-	-	-	-
P1C95-LP	95_SP6_P21.ab1	Ferredoxin--NADP reductase, leaf isozyme 1, chloroplastic Arabidopsis thaliana (Mouse-ear cress)	4e-95	Q9FKW6	vg11_olive_008477	Ferredoxin--NADP reductase, leaf-type isozyme, chloroplastic Nicotiana tabacum (Common tobacco)	OE6A061595T2	Ferredoxin--NADP reductase, leaf-type isozyme, chloroplastic	YES	-	-	YES	-	YES	YES
P1C96-LP	96_SP6_P23.ab1	-	-	-	vg11_olive_030851	Fructose-bisphosphate aldolase, chloroplastic Oryza sativa subsp. japonica (Rice)	OE6A061765T1	Probable fructose-bisphosphate aldolase 2, chloroplastic	-	-	-	YES	YES	YES	YES
P1C97-LP	1_SP6_A02.ab1	-	-	-	-	-	-	-	-	-	-	-	-	-	-
P1C98-LP	2_SP6_A04.ab1	-	-	-	-	-	-	-	-	-	-	-	-	-	-
P1C99-LP	3_SP6_A06.ab1	-	-	-	-	-	-	-	-	-	-	-	-	-	-
P1C100-LP	4_SP6_A08.ab1	Early light-induced protein 2, chloroplastic Arabidopsis thaliana (Mouse-ear cress)	2e-43	Q94K66	vg11_olive_023131	Early light-induced protein, chloroplastic Pisum sativum (Garden pea)	OE6A096707T1	Early light-induced protein 2, chloroplastic	-	-	-	-	-	-	-
P1C101-LP	5_SP6_A10.ab1	-	-	-	-	-	-	-	-	-	-	-	-	-	-
P1C102-LP	6_SP6_A12.ab1	-	-	-	-	-	-	-	-	-	-	-	-	-	-
P1C103-LP	7_SP6_A14.ab1	-	-	-	vg11_olive_007647	Chlorophyll a-b binding protein 21, chloroplastic Nicotiana tabacum (Common tobacco)	OE6A081417T1	Chlorophyll a-b binding protein 21, chloroplastic	-	-	-	-	-	-	-
P1C104-LP	8_SP6_A16.ab1	-	-	-	-	-	-	-	-	-	-	-	-	-	-
P1C105-LP	9_SP6_A18.ab1	-	-	-	vg11_olive_000363	Ribulose bisphosphate carboxylase/oxygenase activase, chloroplastic Oryza sativa subsp. japonica (Rice)	OE6A110201T1	Ribulose bisphosphate carboxylase/oxygenase activase 1, chloroplastic	-	-	-	YES	YES	YES	YES
P1C106-LP	10_SP6_A20.ab1	-	-	-	-	-	-	-	-	-	-	-	-	-	-
P1C107-LP	11_SP6_A22.ab1	Photosystem II 10 kDa polypeptide, chloroplastic Solanum tuberosum (Potato)	5e-28	P06183	vg11_olive_036300	Photosystem II 10 kDa polypeptide, chloroplastic Nicotiana tabacum (Common tobacco)	OE6A077342T1	Photosystem II 10 kDa polypeptide, chloroplastic	-	-	-	YES	YES	YES	YES
P1C108-LP	12_SP6_A24.ab1	-	-	-	-	-	-	-	-	-	-	-	-	-	-
P1C109-LP	13_SP6_C02.ab1	mitochondrial of Thiamine thiazole synthase, chloroplastic Arabidopsis thaliana GN=THI1	6e-105	Q38814-2	vg11_olive_001129	Thiamine thiazole synthase, chloroplastic Citrus sinensis (Sweet orange) (Citrus aurantium var. sinensis)	OE6A016718T1	Thiamine thiazole synthase 1, chloroplastic	-	-	YES	YES	YES	YES	YES
P1C110-LP	14_SP6_C04.ab1	-	-	-	vg11_olive_034708	Metallothionein-like protein 1 Erythranthe guttata (Yellow monkey flower) (Mimulus guttatus)	-	-	-	-	-	-	-	-	-
P1C111-LP	15_SP6_C06.ab1	-	-	-	-	-	-	-	-	-	-	-	-	-	-
P1C112-LP	16_SP6_C08.ab1	-	-	-	-	-	-	-	-	-	-	-	-	-	-
P1C113-LP	17_SP6_C10.ab1	-	-	-	-	-	-	-	-	-	-	-	-	-	-
P1C114-LP	18_SP6_C12.ab1	-	-	-	-	-	-	-	-	-	-	-	-	-	-
P1C115-LP	19_SP6_C14.ab1	Putative uncharacterized protein Oryza sativa subsp. indica (Rice)	6e-93	B8B1H2	vg11_olive_010157	Ubiquitin Triticum aestivum (Wheat)	OE6A023707T1	Polyubiquitin 10	-	-	-	-	-	-	YES
P1C116-LP	20_SP6_C16.ab1	-	-	-	vg11_olive_001164	Glycerate dehydrogenase Cucumis sativus (Cucumber)	OE6A120811T1	UPF0161 protein At3g09310	-	-	-	-	-	-	-
P1C117-LP	21_SP6_C18.ab1	-	-	-	-	-	-	-	-	-	-	-	-	-	-
P1C118-LP	22_SP6_C20.ab1	-	-	-	vg11_olive_011070	Metallothionein-like protein type 3 Carica papaya (Papaya)	OE6A111596T1	Metallothionein-like protein type 3	-	-	-	-	-	-	-
P1C119-LP	23_SP6_C22.ab1	-	-	-	-	-	-	-	-	-	-	-	-	-	-
P1C120-LP	24_SP6_C24.ab1	-	-	-	-	-	-	-	-	-	-	-	-	-	-
P1C121-LP	25_SP6_E02.ab1	ABA-, stress-and ripening-induced protein Fragaria ananassa (Strawberry) (Fragaria chiloensis x Fragaria virginiana)	0.28	G3JVJ6	vg11_olive_009703	Abscisic stress-ripening protein 1 Solanum lycopersicum (Tomato) (Lycopersicon esculentum)	OE6A106849T1	Abscisic stress-ripening protein 1	-	YES	-	YES	YES	YES	YES
P1C122-LP	26_SP6_E04.ab1	-	-	-	-	-	-	-	-	-	-	-	-	-	-
P1C123-LP	27_SP6_E06.ab1	-	-	-	-	-	-	-	-	-	-	-	-	-	-
P1C124-LP	28_SP6_E08.ab1	-	-	-	-	-	-	-	-	-	-	-	-	-	-
P1C125-LP	29_SP6_E10.ab1	Transposase Phaeodactylum tricornutum (Diatom)	2e-11	A0A171NWN9	vg11_olive_012448	Probable receptor protein kinase TMK1 Arabidopsis thaliana (Mouse-ear cress)	-	-	-	-	-	-	-	-	-
P1C126-LP	30_SP6_E12.ab1	Uncharacterized protein Brassica oleracea var. oleracea.	2e-25	A0A0D2ZW07	vg11_olive_008450	-	OE6A037667T1	MAGUK p55 subfamily member 5	-	-	-	-	-	-	-
P1C127-LP	31_SP6_E14.ab1	-	-	-	-	-	-	-	-	-	-	-	-	-	-
P1C128-LP	32_SP6_E16.ab1	-	-	-	vg11_olive_001895	Glyceraldehyde-3-phosphate dehydrogenase, cytosolic Petunia hybrida (Petunia)	OE6A105640T6	Glyceraldehyde-3-phosphate dehydrogenase, cytosolic	-	-	-	YES	YES	YES	YES
P1C129-LP	33_SP6_E18.ab1	-	-	-	-	-	-	-	-	-	-	-	-	-	-
P1C130-LP	34_SP6_E20.ab1	Metallothionein-like protein 1 Erythranthe guttata (Yellow monkey flower) (Mimulus guttatus)	6e-20	P20238	vg11_olive_035962	Metallothionein-like protein 1 Erythranthe guttata (Yellow monkey flower) (Mimulus guttatus)	OE6A058199T1	Metallothionein-like protein 1	-	-	-	YES	YES	YES	YES
P1C131-LP	35_SP6_E22.ab1	-	-	-	-	-	-	-	-	-	-	-	-	-	-
P1C132-LP	36_SP6_E24.ab1	Photosystem II 22 kDa protein, chloroplastic Spinacia oleracea (Spinach)	8e-53	Q02060	vg11_olive_010149	Photosystem II 22 kDa protein, chloroplastic Spinacia oleracea (Spinach)	OE6A058147T1	Photosystem II 22 kDa protein, chloroplastic	-	-	-	-	YES	YES	-
P1C133-LP	37_SP6_G02.ab1	Ribulose bisphosphate carboxylase small chain, chloroplastic Malus sp. (Crab apple)	2e-26	Q02980	vg11_olive_031931	Ribulose bisphosphate carboxylase small chain, chloroplastic Malus sp. (Crab apple)	OE6A080904T1	Ribulose bisphosphate carboxylase small chain, chloroplastic	-	-	-	YES	YES	YES	YES
P1C134-LP	38_SP6_G04.ab1	-	-	-	-	-	-	-	-	-	-	-	-	-	-
P1C135-LP	39_SP6_G06.ab1	-	-	-	-	-	-	-	-	-	-	-	-	-	-
P1C136-LP	40_SP6_G08.ab1	-	-	-	-	-	-	-	-	-	-	-	-	-	-
P1C137-LP	41_SP6_G10.ab1	-	-	-	-	-	-	-	-	-	-	-	-	-	-
P1C138-LP	42_SP6_G12.ab1	-	-	-	-	-	-	-	-	-	-	-	-	-	-
P1C139-LP	43_SP6_G14.ab1	-	-	-	-	-	-	-	-	-	-	-	-	-	-
P1C140-LP	44_SP6_G16.ab1	1-aminocyclopropane-1-carboxylate oxidase Actinidia deliciosa (Kiwi)	1e-47	P31237	vg11_olive_013135	1-aminocyclopropane-1-carboxylate oxidase Actinidia deliciosa (Kiwi)	OE6A066037T2	1-aminocyclopropane-1-carboxylate oxidase	-	-	-	-	-	YES	YES
P1C141-LP	45_SP6_G18.ab1	-	-	-	-	-	-	-	-	-	-	-	-	-	-
P1C142-LP	46_SP6_G20.ab1	-	-	-	-	-	-	-	-	-	-	-	-	-	-
P1C143-LP	47_SP6_G22.ab1	-	-	-	-	-	-	-	-	-	-	-	-	-	-
P1C144-LP	48_SP6_G24.ab1	2 of Heavy metal-associated isoprenylated plant protein 7 Arabidopsis thaliana GN=HIPP07	3e-33	Q9C5D3-2	vg11_olive_039004	Heavy metal-associated isoprenylated plant protein 26 Arabidopsis thaliana (Mouse-ear cress)	OE6A005606T2	Heavy metal-associated isoprenylated plant protein 26	-	-	-	-	-	-	YES
P1C145-LP	49_SP6_I02.ab1	Probable aquaporin PIP2-6 Oryza sativa subsp. japonica (Rice)	3e-32	Q7XLR1	vg11_olive_032004	Probable aquaporin PIP2-4 Arabidopsis thaliana (Mouse-ear cress)	OE6A012339T1	Aquaporin PIP2-1	-	-	-	-	YES	YES	-
P1C146-LP	50_SP6_I04.ab1	-	-	-	vg11_olive_026471	Ribulose bisphosphate carboxylase small chain 2, chloroplastic Spinacia oleracea (Spinach)	OE6A082796T1	Ribulose bisphosphate carboxylase small chain, chloroplastic	-	-	-	-	-	-	-
P1C147-LP	51_SP6_I06.ab1	-	-	-	-	-	-	-	-	-	-	-	-	-	-
P1C148-LP	52_SP6_I08.ab1	Uncharacterized protein Arundo donax (Giant reed) (Donax arundinaceus)	0.023	A0A0A9TY50	vg11_olive_004955	Abscisic stress-ripening protein 1 Solanum lycopersicum (Tomato) (Lycopersicon esculentum)	OE6A106849T1	Abscisic stress-ripening protein 1	-	-	-	YES	YES	YES	YES
P1C149-LP	53_SP6_I10.ab1	Non-specific lipid-transfer protein Malus domestica (Apple) (Pyrus malus)	2e-26	Q9M5X7	vg11_olive_037542	Non-specific lipid-transfer protein Malus domestica (Apple) (Pyrus malus)	OE6A070100T1	Non-specific lipid-transfer protein	-	-	-	-	YES	YES	YES
P1C150-LP	54_SP6_I12.ab1	-	-	-	-	-	-	-	-	-	-	-	-	-	-
P1C151-LP	55_SP6_I14.ab1	-	-	-	vg11_olive_001331	Chlorophyll a-b binding protein 21, chloroplastic Nicotiana tabacum (Common tobacco)	OE6A081417T1	Chlorophyll a-b binding protein 21, chloroplastic	-	-	-	YES	YES	YES	YES
P1C152-LP	56_SP6_I16.ab1	Uncharacterized protein Brachypodium distachyon (Purple false brome) (Trachynia distachya)	2e-90	I1GW86	vg11_olive_010157	Ubiquitin Triticum aestivum (Wheat)	OE6A023707T1	Polyubiquitin 10	-	-	-	-	-	-	YES
P1C153-LP	57_SP6_I18.ab1	Ribulose bisphosphate carboxylase small chain, chloroplastic Pyrus pyrifolia (Chinese pear) (Pyrus serotina)	1e-11	P24007	vg11_olive_034708	Metallothionein-like protein 1 Erythranthe guttata (Yellow monkey flower) (Mimulus guttatus)	OE6A082796T1	Ribulose bisphosphate carboxylase small chain, chloroplastic	-	-	-	-	-	-	-
P1C154-LP	58_SP6_I20.ab1	Putative uncharacterized protein Vitis vinifera (Grape)	1e-21	F6GT48	vg11_olive_026644	Rubredoxin-like superfamily protein Theobroma cacao (Cacao) (Cocoa)	OE6A006438T2	Rubredoxin-1	-	-	-	YES	-	YES	YES
P1C155-LP	59_SP6_I22.ab1	Chlorophyll a-b binding protein 21, chloroplastic Nicotiana tabacum (Common tobacco)	6e-105	P27493	vg11_olive_005897	Chlorophyll a-b binding protein 21, chloroplastic Nicotiana tabacum (Common tobacco)	OE6A081417T1	Chlorophyll a-b binding protein 21, chloroplastic	-	-	-	YES	YES	YES	YES
P1C156-LP	60_SP6_I24.ab1	Granule-bound starch synthase 1, chloroplastic/amyloplastic Solanum tuberosum (Potato)	3e-97	Q00775	vg11_olive_000823	Granule-bound starch synthase 1, chloroplastic/amyloplastic Solanum tuberosum (Potato)	OE6A104392T5	Granule-bound starch synthase 1, chloroplastic/amyloplastic	-	-	-	YES	-	-	YES
P1C157-LP	61_SP6_K02.ab1	2 of Inner membrane protein ALBINO3, chloroplastic Arabidopsis thaliana GN=ALB3	1e-51	Q8LBP4-2	vg11_olive_018438	2 of Inner membrane protein ALBINO3, chloroplastic Arabidopsis thaliana GN=ALB3	OE6A112990T8	Inner membrane protein PPF-1, chloroplastic	YES	YES	-	YES	YES	YES	YES
P1C158-LP	62_SP6_K04.ab1	Galactinol synthase 1 Ajuga reptans (Bugle)	8e-45	Q9XGN4	vg11_olive_001482	Galactinol synthase 1 Ajuga reptans (Bugle)	OE6A001640T2	Galactinol synthase 1	-	-	-	-	-	-	YES
P1C159-LP	63_SP6_K06.ab1	-	-	-	vg11_olive_000591	4-hydroxy-3-methylbut-2-enyl diphosphate reductase, chloroplastic Arabidopsis thaliana (Mouse-ear cress)	OE6A071967T2	4-hydroxy-3-methylbut-2-enyl diphosphate reductase, chloroplastic	-	-	-	YES	YES	YES	-
P1C160-LP	64_SP6_K08.ab1	Ribulose bisphosphate carboxylase small chain, chloroplastic Betula pendula (European white birch) (Betula verrucosa)	2e-22	Q96542	vg11_olive_031931	Ribulose bisphosphate carboxylase small chain, chloroplastic Malus sp. (Crab apple)	OE6A082796T1	Ribulose bisphosphate carboxylase small chain, chloroplastic	-	-	-	YES	YES	YES	YES
P1C161-LP	65_SP6_K10.ab1	Uncharacterized protein Zea mays (Maize)	7e-37	K7VET7	vg11_olive_001189	Omega-3 fatty acid desaturase, chloroplastic Sesamum indicum (Oriental sesame) (Sesamum orientale)	OE6A075849T2	Omega-3 fatty acid desaturase, chloroplastic	-	-	-	YES	YES	YES	YES
P1C162-LP	66_SP6_K12.ab1	-	-	-	-	-	-	-	-	-	-	-	-	-	-
P1C163-LP	67_SP6_K14.ab1	-	-	-	-	-	-	-	-	-	-	-	-	-	-
P1C164-LP	68_SP6_K16.ab1	-	-	-	-	-	-	-	-	-	-	-	-	-	-
P1C165-LP	69_SP6_K18.ab1	-	-	-	-	-	-	-	-	-	-	-	-	-	-
P1C166-LP	70_SP6_K20.ab1	Galactinol synthase 1 Ajuga reptans (Bugle)	4e-27	Q9XGN4	vg11_olive_010152_split_1	BTB/POZ and TAZ domain-containing protein 1 Arabidopsis thaliana (Mouse-ear cress)	OE6A047763T1	Galactinol synthase 1	-	-	-	-	-	-	-
P1C167-LP	71_SP6_K22.ab1	-	-	-	-	-	-	-	-	-	-	-	-	-	-
P1C168-LP	72_SP6_K24.ab1	-	-	-	-	-	-	-	-	-	-	-	-	-	-
P1C169-LP	73_SP6_M02.ab1	-	-	-	-	-	-	-	-	-	-	-	-	-	-
P1C170-LP	74_SP6_M04.ab1	-	-	-	vg11_olive_021958	Protein NLP3 Oryza sativa subsp. japonica (Rice)	OE6A047646T4	Protein NLP7	-	-	-	-	-	-	-
P1C171-LP	75_SP6_M06.ab1	-	-	-	-	-	-	-	-	-	-	-	-	-	-
P1C172-LP	76_SP6_M08.ab1	-	-	-	-	-	-	-	-	-	-	-	-	-	-
P1C173-LP	77_SP6_M10.ab1	-	-	-	-	-	-	-	-	-	-	-	-	-	-
P1C174-LP	78_SP6_M12.ab1	Ubiquitin-60S ribosomal protein L40 Brassica rapa subsp. pekinensis (Chinese cabbage) (Brassica pekinensis)	7e-31	P51423	vg11_olive_037922_split_0	Ubiquitin Avena sativa (Oat)	OE6A023707T2	Polyubiquitin 4	-	-	-	-	-	-	-
P1C175-LP	79_SP6_M14.ab1	-	-	-	-	-	-	-	-	-	-	-	-	-	-
P1C176-LP	80_SP6_M16.ab1	-	-	-	-	-	-	-	-	-	-	-	-	-	-
P1C177-LP	81_SP6_M18.ab1	-	-	-	-	-	-	-	-	-	-	-	-	-	-
P1C178-LP	82_SP6_M20.ab1	-	-	-	-	-	-	-	-	-	-	-	-	-	-
P1C179-LP	83_SP6_M22.ab1	-	-	-	-	-	-	-	-	-	-	-	-	-	-
P1C180-LP	84_SP6_M24.ab1	-	-	-	-	-	-	-	-	-	-	-	-	-	-
P1C181-LP	85_SP6_O02.ab1	-	-	-	vg11_olive_007647	Chlorophyll a-b binding protein 21, chloroplastic Nicotiana tabacum (Common tobacco)	OE6A081417T1	Chlorophyll a-b binding protein 21, chloroplastic	-	-	-	-	YES	YES	YES
P1C182-LP	86_SP6_O04.ab1	-	-	-	-	-	-	-	-	-	-	-	-	-	-
P1C183-LP	87_SP6_O06.ab1	-	-	-	-	-	-	-	-	-	-	-	-	-	-
P1C184-LP	88_SP6_O08.ab1	-	-	-	-	-	-	-	-	-	-	-	-	-	-
P1C185-LP	89_SP6_O10.ab1	-	-	-	-	-	-	-	-	-	-	-	-	-	-
P1C186-LP	90_SP6_O12.ab1	-	-	-	-	-	-	-	-	-	-	-	-	-	-
P1C187-LP	91_SP6_O14.ab1	Splicing factor U2af small subunit A Morus notabilis.	1e-27	W9SF68	vg11_olive_010541	2 of Splicing factor U2af small subunit A Oryza sativa subsp. japonica GN=U2AF35A	OE6A086657T4	Splicing factor U2af small subunit B	-	-	-	-	-	-	-
P1C188-LP	92_SP6_O16.ab1	-	-	-	-	-	-	-	-	-	-	-	-	-	-
P1C189-LP	93_SP6_O18.ab1	Photosystem II reaction center protein Z Piper cenocladum (Ant piper) Plastid Chloroplast	5e-07	Q06GR3	vg11_olive_026971	Polyol transporter 5 Arabidopsis thaliana (Mouse-ear cress)	OE6A102094T2	Polyol transporter 5	-	-	-	-	-	-	-
P1C190-LP	94_SP6_O20.ab1	Metallothionein-like protein type 3 Actinidia deliciosa (Kiwi)	7e-20	P43389	vg11_olive_011070	Metallothionein-like protein type 3 Carica papaya (Papaya)	OE6A111596T1	Metallothionein-like protein type 3	-	-	-	-	-	-	-
P1C191-LP	95_SP6_O22.ab1	-	-	-	vg11_olive_012448	Probable receptor protein kinase TMK1 Arabidopsis thaliana (Mouse-ear cress)	OE6A007915T1	Probable receptor protein kinase TMK1	-	YES	-	YES	YES	-	-
P1C192-LP	96_SP6_O24.ab1	-	-	-	-	-	-	-	-	-	-	-	-	-	-
